# Supplementary material for: The first report of direct inhibitors that target the C-terminal MEEVD region on heat shock protein 90
Source: Royal Society of Chemistry journal article supplement (doi:10.1039/c5cc03245h), 2015-10-14

# De novo design of heat shock protein 90 inhibitors: direct inhibition of the C-terminus

L. K. Buckton<sup>a</sup>, H. Wahyudi<sup>a</sup> and S. R. McAlpine<sup>a\*</sup>

<sup>a</sup>School of Chemistry, University of New South Wales, Kensington NSW 2052 Australia.

\*Corresponding author email: s.mcalpine@unsw.edu.au

## Table of Contents

|                                                                |    |
|----------------------------------------------------------------|----|
| Supplementary Figure 1 (Figure S1)                             | 2  |
| Supplementary Figure 2 (Figure S2)                             | 2  |
| <b>Chemistry: Synthesis and Spectral Data</b>                  |    |
| General Remarks                                                | 3  |
| General Procedures for Synthesis of Linear Peptides            | 3  |
| General Procedures for Synthesis of Cyclic Peptides            | 4  |
| General Procedures for Removal of Side Chain Protecting Groups | 4  |
| Experimental Procedures                                        |    |
| 5.1 LIN                                                        | 4  |
| 5.1 CYC                                                        | 6  |
| 6.1 LIN                                                        | 7  |
| 6.1 CYC                                                        | 8  |
| 7.1 LIN                                                        | 9  |
| 7.1 CYC                                                        | 10 |
| 8.1 LIN                                                        | 11 |
| 8.1 CYC                                                        | 12 |
| 5.2 LIN                                                        | 13 |
| 5.2 CYC                                                        | 14 |
| 6.2 LIN                                                        | 15 |
| 6.2 CYC                                                        | 17 |
| 7.2 LIN                                                        | 17 |
| 7.2 CYC                                                        | 19 |
| 8.2 LIN                                                        | 20 |
| 8.2 CYC                                                        | 22 |
| TPR Peptide                                                    | 23 |
| MEEVD Peptide                                                  | 24 |
| Spectral Data                                                  |    |
| 5.1 LIN                                                        | 26 |
| 5.1 CYC                                                        | 30 |
| 6.1 LIN                                                        | 34 |
| 6.1 CYC                                                        | 38 |
| 7.1 LIN                                                        | 42 |
| 7.1 CYC                                                        | 46 |
| 8.1 LIN                                                        | 50 |
| 8.1 CYC                                                        | 54 |
| 5.2 LIN                                                        | 58 |
| 5.2 CYC                                                        | 61 |
| 6.2 LIN                                                        | 64 |
| 6.2 CYC                                                        | 68 |
| 7.2 LIN                                                        | 72 |
| 7.2 CYC                                                        | 75 |
| 8.2 LIN                                                        | 78 |
| 8.2 CYC                                                        | 81 |
| TPR Peptide                                                    | 84 |
| <b>Biology Methodology</b>                                     |    |
| AlphaScreen (PerkinElmer) Protein-Protein Binding Assay        | 88 |
| Luciferase Protein Renaturation Assay                          | 88 |
| <b><sup>1</sup>H NMR Titration Experiments</b>                 |    |
| Experimental Procedure                                         | 88 |
| Full Spectra                                                   | 89 |
| Enlarged Spectra                                               | 94 |

## Supplementary Figure 1 (Figure S1)

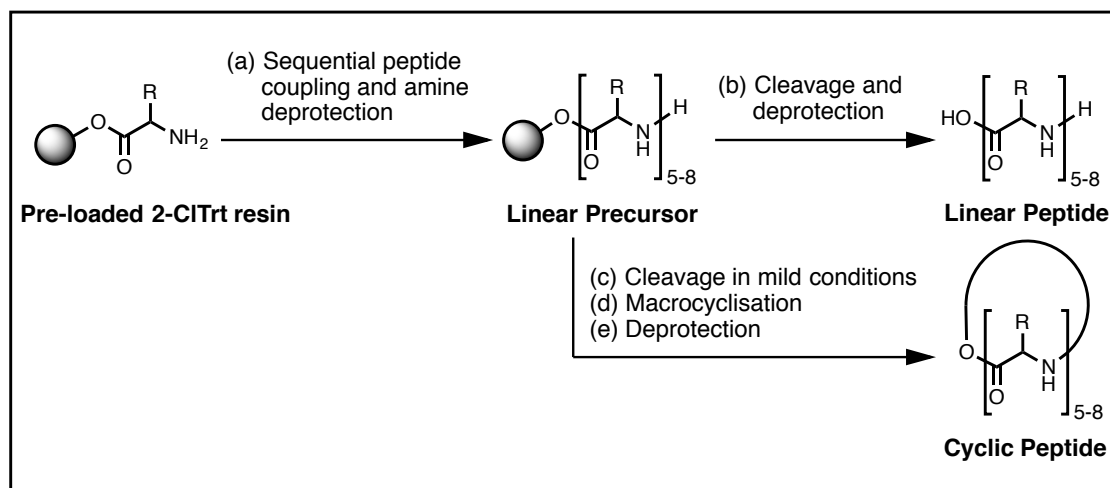

**Figure S1.** Overview of synthetic approach. Reaction conditions for each step are as follows: **(a)** Fmoc-protected amino acid (3 eq.), HOAt or HOBt (3 eq.), DIC (6 eq.) in DMF (0.3 M) followed by washing with 20% piperidine in DMF. **(b)** TFA (4 mL/g of resin with anisole (2 eq./side chain protecting group)). **(c)** TFE:CH<sub>2</sub>Cl<sub>2</sub> (1:1, 10 mL/g resin). **(d)** HATU (1 eq.), TBTU (0.8 eq.), DMTMM (0.8 eq.), DIPEA (8 eq.) in CH<sub>2</sub>Cl<sub>2</sub> (0.001 M). **(e)** TFA (4 mL/g of peptide with anisole (2 eq./side chain protecting group)).

## Supplementary Figure 2 (Figure S2)

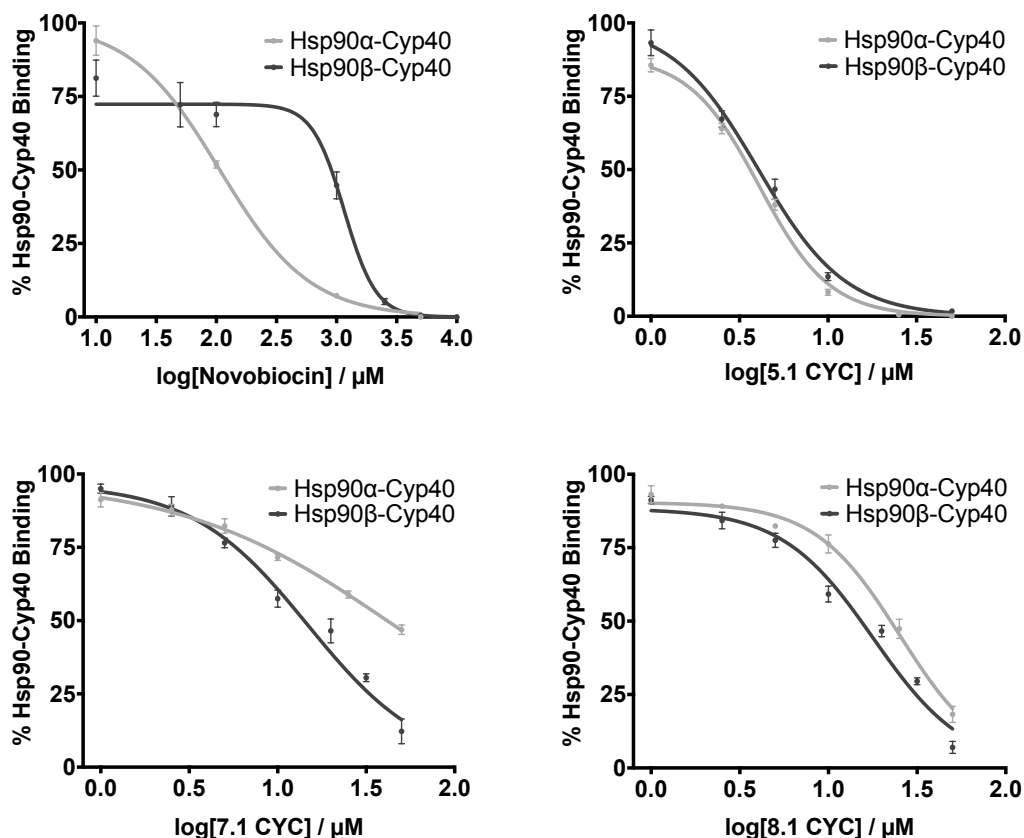

**Figure S2.** Impact of novobiocin, 5.1 CYC, 7.1 CYC and 8.1 CYC on binding of both α and β isoforms of Hsp90 with Cyp40. Graphs represent mean ± SEM,  $n = 3$ .

## Supporting Information

### **General Remarks**

All chemicals were purchased from commercial suppliers (Chem-Impex International, Peptide International, GL-Biochem and Sigma Aldrich) and used without further purification. All moisture sensitive reactions were performed using anhydrous solvents under nitrogen gas. Removal of solvent was carried out under reduced pressure using a Buchi R-210 rotary evaporator.

Thin Layer Chromatography (TLC) was performed on aluminium silica gel sheets (Merck TLC silica gel 60 F254). Spots were visualised under ultraviolet light ( $\lambda = 254$  nm) and developed by heating with ninhydrin solution.

LC/MS analyses were performed using a Waters Symmetry® C18 column (3.5  $\mu\text{m}$ , 4.65 x 75 mm) on a Shimadzu Prominence High Performance LCMS 2010EV system connected to a Shimadzu LCMS 2010EV mass spectrometer. The mobile phase consisted of milli-Q water with 0.1% (v/v) formic acid (Mobile Phase A), and HPLC grade acetonitrile with 0.1% (v/v) formic acid (Mobile Phase B) at a flow rate of 0.5 mL/min, starting at 95% Mobile Phase A and 5% Mobile Phase B.

Semi-preparative HPLC for purification was performed using a GRACE VisionHT C18 column (5  $\mu\text{m}$ , 22 x 150 mm) on a Shimadzu Prominence High Performance LCMS 2010EV system. The mobile phase consisted of milli-Q water with 0.1% (v/v) formic acid (Mobile Phase A), and HPLC grade acetonitrile with 0.1% (v/v) formic acid (Mobile Phase B) at a flow rate of 5 mL/min, starting at 95% Mobile Phase A and 5% Mobile Phase B.

$^1\text{H}$  and  $^{13}\text{C}$  NMR spectra were obtained on Bruker Avance III 600 MHz. All samples were dissolved in deuterium oxide ( $\text{D}_2\text{O}$ ). Linear peptide spectra were obtained at 318 K (45 °C) while cyclic peptide spectra were obtained at 308 K (35 °C). Multiplicity of NMR signals were represented by the following abbreviations: s = singlet, d = doublet, t = triplet, q = quartet, m = multiplet, br = broad, dd = doublet of doublet.

High-resolution mass spectrometry (HRMS) analyses were recorded on a Thermo LTQ Orbitrap XL ESI/APCI with UPLC system at the Bioanalytical Mass Spectrometry Facility in Mark Wainwright Analytical Centre at the University of New South Wales.

### **General Procedures for Synthesis of Linear Peptides**

#### **Solid-Phase Peptide Synthesis**

Stepwise SPPS was performed in a polypropylene solid-phase extraction cartridge fitted with a 20  $\mu\text{m}$  polyethylene frit purchased from Applied Separations (Allentown, PA) using pre-loaded 2-CITrt resins with loading scales between 0.2-0.9 mmol/g. The resin was weighed, transferred to the cartridge and swelled in DMF for 30 minutes prior to the first coupling reaction.

#### **Coupling Reaction**

Couplings were performed in DMF at a concentration of 0.3 M. Fmoc-protected amino acid (3 eq.) and HOBt (3 eq.) were mixed with the resin. DIC (6 eq.) was then added to activate the reaction. Coupling was allowed to proceed for a minimum of 4 hours while shaking (Labquake tube shaker, Thermo Fisher Scientific) at room temperature. Reaction was monitored using thin layer chromatography (TLC) with a ninhydrin test. Upon completion, the reaction solution was drained and the resin was subjected to *Fmoc Removal*. (Note: For particularly hindered coupling reactions, HOBt was replaced with HOAt and the reaction was allowed to proceed overnight.)

#### **Fmoc Removal**

After the peptide coupling reaction was complete, the Fmoc protecting group was removed using the following washes: DMF (3 x 1 min), 20% piperidine in DMF (1 x 5 min), 20% piperidine in DMF (1 x 10 min), DMF (2 x 1 min), IPA (1 x 1 min), DMF (1 x 1 min), IPA (1 x 1 min) and DMF (3 x 1 min). The resin was then ready for the next coupling reaction.

#### **Cleavage**

Once the desired peptide was generated, the final Fmoc protecting group was removed following *Fmoc Removal* procedure with the following additional washes: DMF (3 x 1 min), IPA (3 x 1 min) and MeOH (3 x 1 min). The resin-bound peptide was then dried *in vacuo* overnight. The resin was then cleaved from the linear peptide using TFE and  $\text{CH}_2\text{Cl}_2$  (1:1 v/v) at a concentration of 10 mL/g resin. The reaction was allowed to stir at room temperature for 48 hours. The suspension was then filtered through a Büchner funnel and the resin was washed with additional  $\text{CH}_2\text{Cl}_2$  to fully extract the linear peptide. The filtrate was then evaporated and the dried solid was redissolved in  $\text{CH}_2\text{Cl}_2$  and evaporated multiple times to remove residual entrapped TFE. The linear peptide was then dried *in vacuo* overnight.

## Supporting Information

### General Procedure for Synthesis of Cyclic Peptides

Macrocyclisation of the linear peptide was achieved using a cocktail of 3 coupling reagents: HATU (1 eq.), TBTU (0.5 eq.) and DMTMM (0.5 eq.). The reaction was performed in dilute conditions using anhydrous solvents at concentration of 0.001 M. The linear peptide and coupling reagents were dissolved separately in  $\text{CH}_2\text{Cl}_2$ , where 20% of the final volume was used to dissolve the linear peptide and the other 80% dissolved the coupling reagents. DIPEA (4 eq.) was added to each solution. The linear peptide solution was then added drop-wise to the coupling reagents solution *via* a syringe pump over approximately 2 hours. The reaction was stirred overnight and monitored using LC/MS. (Note: if the reaction failed to reach completion after stirring overnight, additional HATU (1 eq.) was added and the reaction was monitored using LC/MS.) Upon completion, the reaction mixture was evaporated and the dry solid was subjected to acid-base work-up with saturated sodium bicarbonate ( $\text{NaHCO}_3$ ) and milli-Q water acidified to pH 3 using ammonium chloride ( $\text{NH}_4\text{Cl}$ ) and hydrochloric acid (HCl) to remove excess DIPEA. The organic layer was then dried over  $\text{Na}_2\text{SO}_4$ , filtered and evaporated under reduced pressure before the compound was dried *in vacuo* overnight.

### General Procedure for Removal of Side Chain Protecting Groups

Amino acid side chain protecting groups were removed using neat TFA and anisole. 2 equivalents of anisole was added per protecting group to be removed. Anisole was added to the linear or cyclic peptide, whilst stirring, followed by neat TFA at a concentration of 1 mL/250 mg compound. The reaction was left stirring at room temperature for 4 hours. The reaction was monitored using LC/MS and once complete the solvent was evaporated before redissolving in  $\text{CH}_2\text{Cl}_2$  and evaporating multiple times to remove residual entrapped TFA. The peptide was then dried *in vacuo* overnight.

### Synthesis of 5.1 LIN and 5.1 CYC

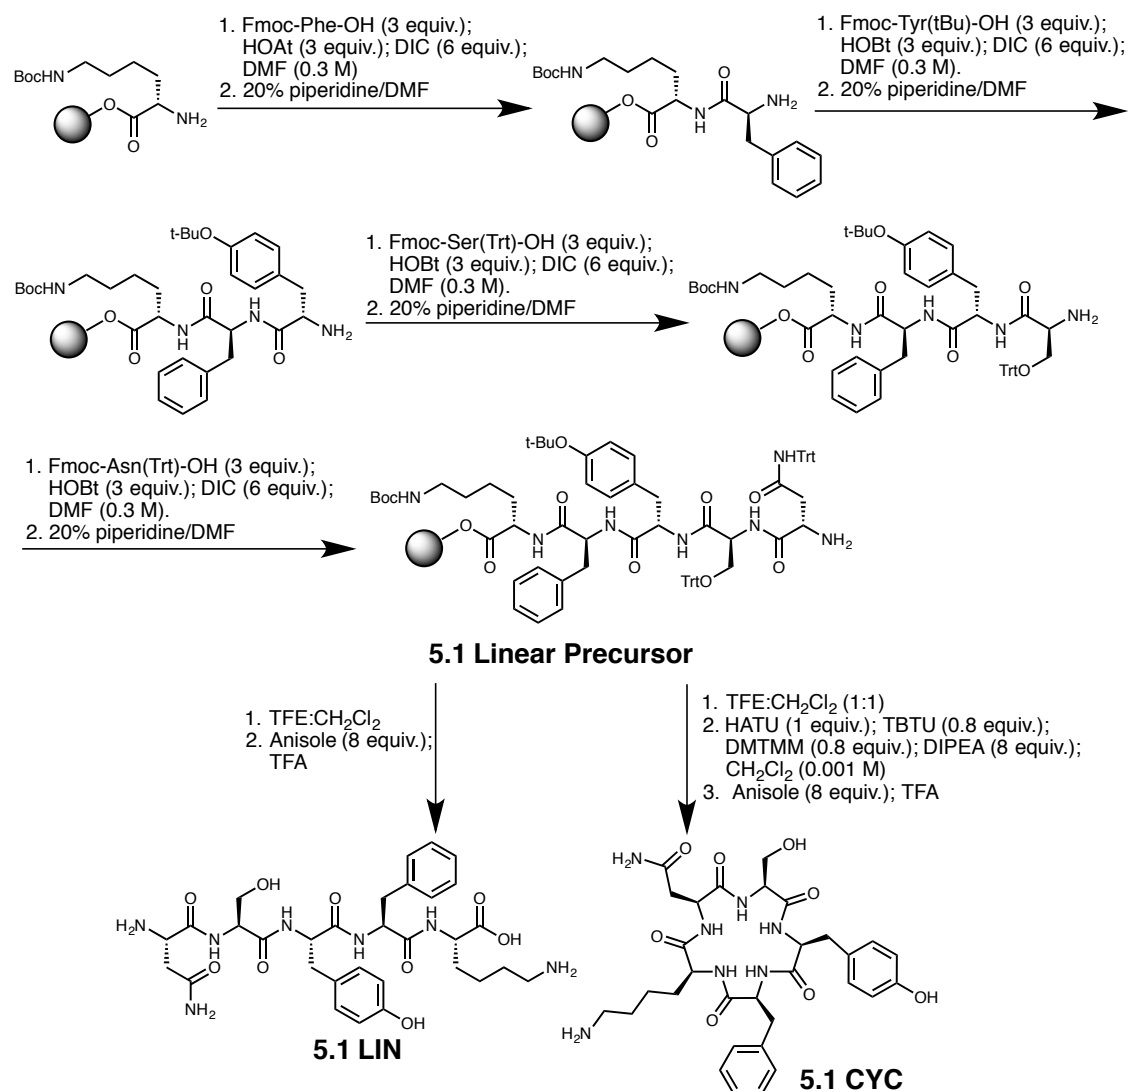

## Supporting Information

### Experimental Procedures for 5.1 LIN

#### Resin-O-Lys(Boc)-Phe-NH<sub>2</sub>

The resin-bound dipeptide Resin-O-Lys(Boc)-Phe-NH<sub>2</sub> was synthesised following the *Coupling Reaction* procedure using 1.0 g H-Lys(Boc)-2-CITrt resin (0.50 mmol, 1 eq.), 0.58 g Fmoc-Phe-OH (1.5 mmol, 3 eq.), 0.21 g HOAt (1.5 mmol, 3 eq.), 0.46 mL DIC (3.0 mmol, 6 eq.) and 5.0 mL DMF to generate a concentration of 0.30 M. The coupling reaction was run overnight and a negative ninhydrin test was used to confirm the reaction was complete. The reaction mixture was then drained to produce Resin-O-Lys(Boc)-Phe-NHFmoc. The Fmoc protecting group was removed following the *Fmoc Removal* procedure and a positive ninhydrin test was used to confirm complete removal, producing Resin-O-Lys(Boc)-Phe-NH<sub>2</sub>.

#### Resin-O-Lys(Boc)-Phe-Tyr(t-Bu)-NH<sub>2</sub>

The resin-bound tripeptide Resin-O-Lys(Boc)-Phe-Tyr(t-Bu)-NH<sub>2</sub> was synthesised following the *Coupling Reaction* procedure using Resin-O-Lys(Boc)-Phe-NH<sub>2</sub> synthesised from previous coupling reaction, together with 0.69 g Fmoc-Tyr(t-Bu)-OH (1.5 mmol, 3 eq.), 0.21 g HOBt (1.5 mmol, 3 eq.), 0.46 mL DIC (3.0 mmol, 6 eq.) and 5.0 mL DMF to generate a concentration of 0.30 M. The coupling reaction was run for 4 hours and a negative ninhydrin test was used to confirm the reaction was complete. The reaction mixture was then drained to produce Resin-O-Lys(Boc)-Phe-Tyr(t-Bu)-NHFmoc. The Fmoc protecting group was removed following the *Fmoc Removal* procedure and a positive ninhydrin test was used to confirm complete removal, producing Resin-O-Lys(Boc)-Phe-Tyr(t-Bu)-NH<sub>2</sub>.

#### Resin-O-Lys(Boc)-Phe-Tyr(t-Bu)-Ser(Trt)-NH<sub>2</sub>

The resin-bound tetrapeptide Resin-O-Lys(Boc)-Phe-Tyr(t-Bu)-Ser(Trt)-NH<sub>2</sub> was synthesised following the *Coupling Reaction* procedure using Resin-O-Lys(Boc)-Phe-Tyr(t-Bu)-NH<sub>2</sub> synthesised from previous coupling reaction, together with 0.86 g Fmoc-Ser(Trt)-OH (1.5 mmol, 3 eq.), 0.21 g HOBt (1.5 mmol, 3 eq.), 0.46 mL DIC (3.0 mmol, 6 eq.) and 5.0 mL DMF to generate a concentration of 0.30 M. The coupling reaction was run for 4 hours and a negative ninhydrin test was used to confirm the reaction was complete. The reaction mixture was then drained to produce Resin-O-Lys(Boc)-Phe-Tyr(t-Bu)-Ser(Trt)-NHFmoc. The Fmoc protecting group was removed following the *Fmoc Removal* procedure and a positive ninhydrin test was used to confirm complete removal, producing Resin-O-Lys(Boc)-Phe-Tyr(t-Bu)-Ser(Trt)-NH<sub>2</sub>.

#### Resin-O-Lys(Boc)-Phe-Tyr(t-Bu)-Ser(Trt)-Asn(Trt)-NH<sub>2</sub>

The resin-bound pentapeptide Resin-O-Lys(Boc)-Phe-Tyr(t-Bu)-Ser(Trt)-Asn(Trt)-NH<sub>2</sub> was synthesised following the *Coupling Reaction* procedure using Resin-O-Lys(Boc)-Phe-Tyr(t-Bu)-Ser(Trt)-NH<sub>2</sub> synthesised from previous coupling reaction, together with 0.92 g Fmoc-Asn(Trt)-OH (1.5 mmol, 3 eq.), 0.21 g HOBt (1.5 mmol, 3 eq.), 0.46 mL DIC (3.0 mmol, 6 eq.) and 5.0 mL DMF to generate a concentration of 0.30 M. The coupling reaction was run for 4 hours and a negative ninhydrin test was used to confirm the reaction was complete. The reaction mixture was then drained to produce Resin-O-Lys(Boc)-Phe-Tyr(t-Bu)-Ser(Trt)-Asn(Trt)-NHFmoc. The Fmoc protecting group was removed following the *Fmoc Removal* procedure and a positive ninhydrin test was used to confirm complete removal, producing Resin-O-Lys(Boc)-Phe-Tyr(t-Bu)-Ser(Trt)-Asn(Trt)-NH<sub>2</sub>.

The resin-bound pentapeptide was then divided into 2 equal portions of 1.3 g, where one part was reserved for the synthesis of the 6.1 compound series and the other was taken forward to complete the synthesis of the 5.1 compound series.

#### HO-Lys(Boc)-Phe-Tyr(t-Bu)-Ser(Trt)-Asn(Trt)-NH<sub>2</sub>

The linear pentapeptide HO-Lys(Boc)-Phe-Tyr(t-Bu)-Ser(Trt)-Asn(Trt)-NH<sub>2</sub> was generated following the *Cleavage* procedure. The linear peptide was cleaved from the resin using a mixed solution of 3.6 mL of TFE and 3.6 mL of CH<sub>2</sub>Cl<sub>2</sub>. The resin-containing solution was filtered and dried *in vacuo* to yield HO-Lys(Boc)-Phe-Tyr(t-Bu)-Ser(Trt)-Asn(Trt)-NH<sub>2</sub> as a white solid (286 mg, overall 87%).

#### HO-Lys-Phe-Tyr-Ser-Asn-NH<sub>2</sub>

The free linear peptide HO-Lys-Phe-Tyr-Ser-Asn-NH<sub>2</sub> was generated by removing the side chain protecting groups on HO-Lys(Boc)-Phe-Tyr(t-Bu)-Ser(Trt)-Asn(Trt)-NH<sub>2</sub>. 30 mg HO-Lys(Boc)-Phe-Tyr(t-Bu)-Ser(Trt)-Asn(Trt)-NH<sub>2</sub> (0.02 mmol, 1 eq.) was deprotected using a mixture of 120 μL of TFA and anisole (8 eq.). The free linear peptide then underwent HPLC purification to generate pure final compound **5.1 LIN** in a 29% yield as a white solid.

LC/MS (ESI) *m/z*: [M+2H]<sup>2+</sup> calcd for C<sub>31</sub>H<sub>43</sub>N<sub>7</sub>O<sub>9</sub>, 329.66; found, 329.50.

HRMS (ESI-TOF) *m/z*: [M+H]<sup>+</sup> calcd for C<sub>31</sub>H<sub>43</sub>N<sub>7</sub>O<sub>9</sub>, 658.3100; found, 658.3196.

<sup>1</sup>H NMR (600 MHz, D<sub>2</sub>O) δ 7.53-7.33 (m, 5H, Phe), 7.21-7.15 (d, *J* = 8.58 Hz, 2H, δH Tyr), 6.96-6.91 (d, *J* = 8.58 Hz, 2H, εH Tyr), 4.59-4.55 (t, *J* = 5.76 Hz, 1H, αH Ser), 4.36-4.29 (m, 1H, αH Asn), 4.27-4.22 (t, *J* = 5.58 Hz, 1H, αH Lys), 3.92-3.82 (d, *J* = 5.76 Hz, 2H, βCH<sub>2</sub> Ser), 3.32-3.28 & 3.15-3.06 (m, 2H, βCH<sub>2</sub> Phe), 3.15-3.06 (m, 2H, εCH<sub>2</sub> Lys), 3.15-3.06 & 3.05-2.89 (m, 2H, βCH<sub>2</sub> Tyr), 3.05-2.89 (m, 2H, βCH<sub>2</sub> Asn), 1.97-1.88 (m, 2H, βCH<sub>2</sub> Lys), 1.86-1.77 (m, 2H, δCH<sub>2</sub> Lys), 1.52-1.45 (m, 2H, γCH<sub>2</sub> Lys).

## Supporting Information

### Experimental Procedures for 5.1 CYC

#### Resin-O-Phe-Tyr(t-Bu)-NH<sub>2</sub>

The resin-bound dipeptide Resin-O-Phe-NH<sub>2</sub> was synthesised following the *Coupling Reaction* procedure using 0.50 g H-Phe-2-ClTrt resin (0.29 mmol, 1 eq.), 0.39 g Fmoc-Tyr(t-Bu)-OH (0.86 mmol, 3 eq.), 0.12 g HOBt (0.86 mmol, 3 eq.), 0.26 mL DIC (1.71 mmol, 6 eq.) and 2.9 mL DMF to generate a concentration of 0.30 M. The coupling reaction was run for 4 hours and a negative ninhydrin test was used to confirm the reaction was complete. The reaction mixture was then drained to produce Resin-O-Phe-Tyr(t-Bu)-NHFmoc. The Fmoc protecting group was removed following the *Fmoc Removal* procedure and a positive ninhydrin test was used to confirm complete removal, producing Resin-O-Phe-Tyr(t-Bu)-NH<sub>2</sub>.

#### Resin-O-Phe-Tyr(t-Bu)-Ser(Trt)-NH<sub>2</sub>

The resin-bound tripeptide Resin-O-Phe-Tyr(t-Bu)-Ser(Trt)-NH<sub>2</sub> was synthesised following the *Coupling Reaction* procedure using Resin-O-Phe-Tyr(t-Bu)-NH<sub>2</sub> synthesised from previous coupling reaction, together with 0.49 g Fmoc-Ser(Trt)-OH (0.89 mmol, 3 eq.), 0.12 g HOAt (0.89 mmol, 3 eq.), 0.26 mL DIC (3.0 mmol, 6 eq.) and 2.9 mL DMF to generate a concentration of 0.30 M. The coupling reaction was run overnight and a negative ninhydrin test was used to confirm the reaction was complete. The reaction mixture was then drained to produce Resin-O-Phe-Tyr(t-Bu)-Ser(Trt)-NHFmoc. The Fmoc protecting group was removed following the *Fmoc Removal* procedure and a positive ninhydrin test was used to confirm complete removal, producing Resin-O-Phe-Tyr(t-Bu)-Ser(Trt)-NH<sub>2</sub>.

#### Resin-O-Phe-Tyr(t-Bu)-Ser(Trt)-Asn(Trt)-NH<sub>2</sub>

The resin-bound tetrapeptide Resin-O-Phe-Tyr(t-Bu)-Ser(Trt)-Asn(Trt)-NH<sub>2</sub> was synthesised following the *Coupling Reaction* procedure using Resin-O-Phe-Tyr(t-Bu)-Ser(Trt)-NH<sub>2</sub> synthesised from previous coupling reaction, together with 0.53 g Fmoc-Asn(Trt)-OH (0.89 mmol, 3 eq.), 0.12 g HOAt (0.89 mmol, 3 eq.), 0.26 mL DIC (3.0 mmol, 6 eq.) and 2.9 mL DMF to generate a concentration of 0.30 M. The coupling reaction was run overnight and a negative ninhydrin test was used to confirm the reaction was complete. The reaction mixture was then drained to produce Resin-O-Phe-Tyr(t-Bu)-Ser(Trt)-Asn(Trt)-NHFmoc. The Fmoc protecting group was removed following the *Fmoc Removal* procedure and a positive ninhydrin test was used to confirm complete removal, producing Resin-O-Phe-Tyr(t-Bu)-Ser(Trt)-Asn(Trt)-NH<sub>2</sub>.

#### Resin-O-Phe-Tyr(t-Bu)-Ser(Trt)-Asn(Trt)-Lys(Boc)-NH<sub>2</sub>

The resin-bound pentapeptide Resin-O-Phe-Tyr(t-Bu)-Ser(Trt)-Asn(Trt)-Lys(Boc)-NH<sub>2</sub> was synthesised following the *Coupling Reaction* procedure using Resin-O-Phe-Tyr(t-Bu)-Ser(Trt)-Asn(Trt)-NH<sub>2</sub> synthesised from previous coupling reaction, together with 0.40 g Fmoc-Lys(Boc)-OH (0.89 mmol, 3 eq.), 0.12 g HOAt (0.89 mmol, 3 eq.), 0.26 mL DIC (3.0 mmol, 6 eq.) and 2.9 mL DMF to generate a concentration of 0.30 M. The coupling reaction was run overnight and a negative ninhydrin test was used to confirm the reaction was complete. The reaction mixture was then drained to produce Resin-O-Phe-Tyr(t-Bu)-Ser(Trt)-Asn(Trt)-Lys(Boc)-NHFmoc. The Fmoc protecting group was removed following the *Fmoc Removal* procedure and a positive ninhydrin test was used to confirm complete removal, producing Resin-O-Phe-Tyr(t-Bu)-Ser(Trt)-Asn(Trt)-Lys(Boc)-NH<sub>2</sub>.

#### HO-Phe-Tyr(t-Bu)-Ser(Trt)-Asn(Trt)-Lys(Boc)-NH<sub>2</sub>

The linear pentapeptide HO-Phe-Tyr(t-Bu)-Ser(Trt)-Asn(Trt)-Lys(Boc)-NH<sub>2</sub> was generated following the *Cleavage* procedure. The linear peptide was cleaved from the resin using a mixed solution of 3.5 mL of TFE and 3.5 mL of CH<sub>2</sub>Cl<sub>2</sub>. The resin-containing solution was filtered and dried *in vacuo* to yield HO-Phe-Tyr(t-Bu)-Ser(Trt)-Asn(Trt)-Lys(Boc)-NH<sub>2</sub> as a white solid (267 mg, overall 72%).

#### cyclo-Phe-Tyr(t-Bu)-Ser(Trt)-Asn(Trt)-Lys(Boc)

cyclo-Phe-Tyr(t-Bu)-Ser(Trt)-Asn(Trt)-Lys(Boc) was synthesised using 0.16 g HO-Phe-Tyr(t-Bu)-Ser(Trt)-Asn(Trt)-Lys(Boc)-NH<sub>2</sub> (0.12 mmol, 1 eq.), 0.046 g HATU (0.12 mmol, 1 eq.), 0.021 g TBTU (0.060 mmol, 0.5 eq.), 0.018 g DMTMM (0.060 mmol, 0.5 eq.), 0.09 mL DIPEA (0.96 mmol, 8 eq.) in anhydrous CH<sub>2</sub>Cl<sub>2</sub> (122 mL, 0.001 M) following the *General Procedure for Synthesis of Cyclic Peptides*. The reaction was allowed to stir overnight and the reaction was monitored *via* LC/MS. Once complete, the reaction mixture was subjected to an acid-base work-up before drying over Na<sub>2</sub>SO<sub>4</sub>, filtering, evaporating under reduced pressure and drying *in vacuo* to yield crude cyclo-Phe-Tyr(t-Bu)-Ser(Trt)-Asn(Trt)-Lys(Boc).

#### cyclo-Phe-Tyr-Ser-Asn-Lys

The free cyclic peptide cyclo-Phe-Tyr-Ser-Asn-Lys was generated by removing the side chain protecting groups on cyclo-Phe-Tyr(t-Bu)-Ser(Trt)-Asn(Trt)-Lys(Boc). 100 mg cyclo-Phe-Tyr(t-Bu)-Ser(Trt)-Asn(Trt)-Lys(Boc) (0.08 mmol, 1 eq.) was deprotected using a mixture of 400  $\mu$ L of TFA and anisole (8 eq.). The free cyclic peptide then underwent HPLC purification to generate pure final compound **5.1 CYC** in a 42% yield as a white solid.

LC/MS (ESI) *m/z*: [M+H]<sup>+</sup> calcd for C<sub>31</sub>H<sub>41</sub>N<sub>7</sub>O<sub>8</sub>, 640.30; found, 640.20.

HRMS (ESI-TOF) *m/z*: [M+H]<sup>+</sup> calcd for C<sub>31</sub>H<sub>41</sub>N<sub>7</sub>O<sub>8</sub>, 640.3000; found, 640.3090.

## Supporting Information

$^1\text{H}$  NMR (600 MHz,  $\text{D}_2\text{O}$ )  $\delta$  7.57-7.03 (m, 5H, Phe), 7.57-7.03 (m, 2H,  $\delta\text{H}$  Tyr), 7.03-6.86 (m, 2H,  $\epsilon\text{H}$  Tyr), 4.55-4.39 (m, 1H,  $\alpha\text{H}$  Tyr), 4.39-4.16 (m, 1H,  $\alpha\text{H}$  Ser), 4.09-3.96 (m, 2H,  $\beta\text{CH}_2$  Ser), 3.96-3.79 (m, 1H,  $\alpha\text{H}$  Lys), 3.42-3.33 & 3.33-3.19 (m, 2H,  $\beta\text{CH}_2$  Phe), 3.19-3.07 (m, 2H,  $\epsilon\text{CH}_2$  Lys), 3.19-2.80 (m, 2H,  $\beta\text{CH}_2$  Tyr), 3.19-2.80 (m, 2H,  $\beta\text{CH}_2$  Asn), 2.22-1.71 (m, 2H,  $\beta\text{CH}_2$  Lys), 1.89-1.77 (m, 2H,  $\delta\text{CH}_2$  Lys), 1.59-1.43 (m, 2H,  $\gamma\text{CH}_2$  Lys).

### Synthesis of 6.1 LIN and 6.1 CYC

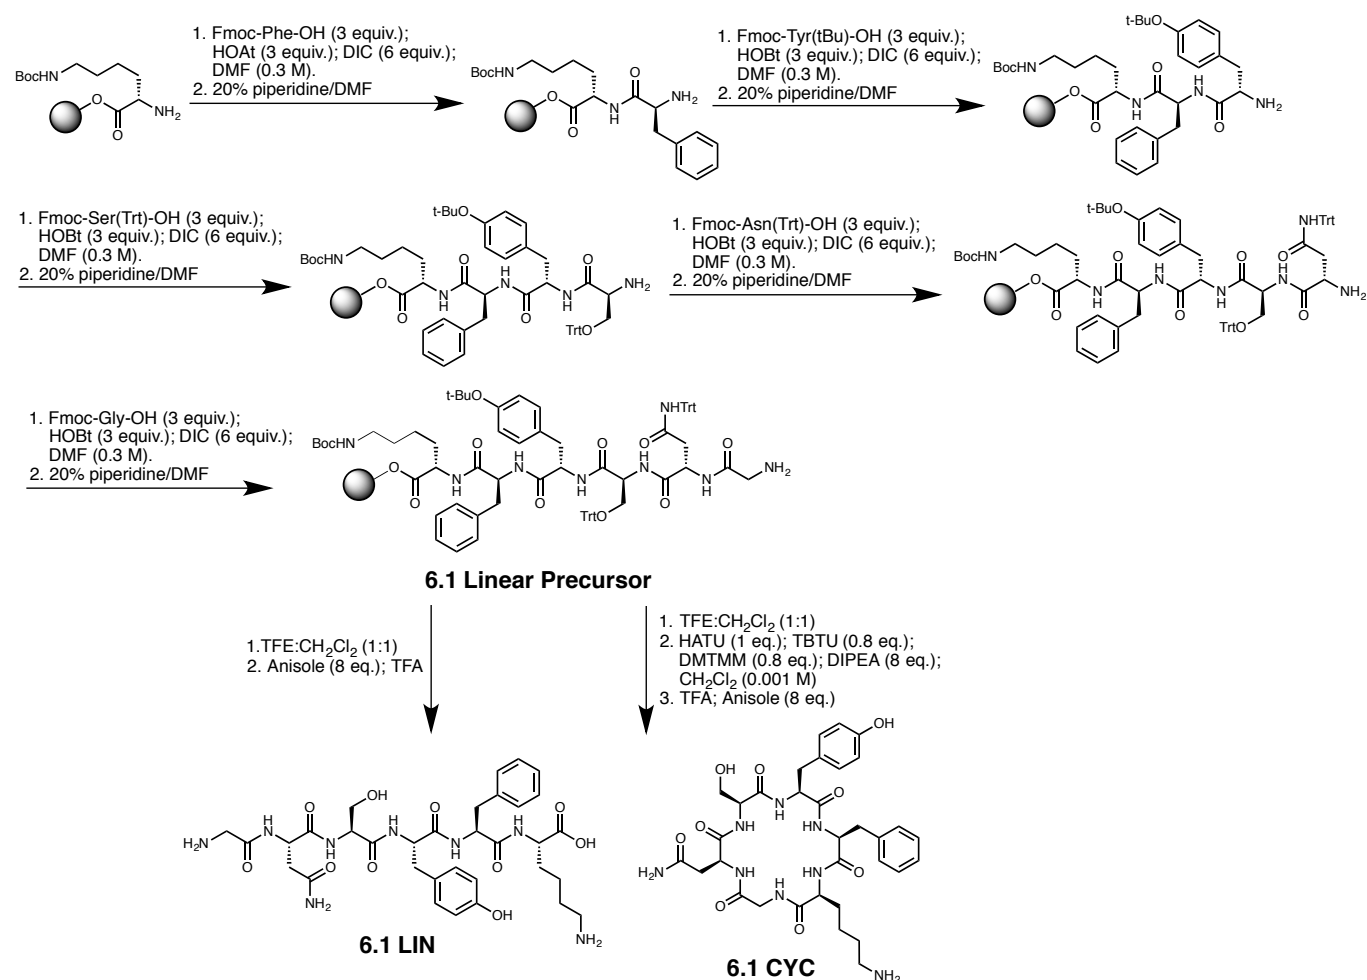

### Experimental Procedures for 6.1 LIN

#### Resin-O-Lys(Boc)-Phe-Tyr(t-Bu)-Ser(Trt)-Asn(Trt)-Gly-NH<sub>2</sub>

The resin-bound hexapeptide Resin-O-Lys(Boc)-Phe-Tyr(t-Bu)-Ser(Trt)-Asn(Trt)-Gly-NH<sub>2</sub> was synthesised following the *Coupling Reaction* procedure using 1.3 g Resin-O-Lys(Boc)-Phe-Tyr(t-Bu)-Ser(Trt)-Asn(Trt)-NH<sub>2</sub> (0.25 mmol, 1 eq.) reserved from the synthesis of **5.1 LIN**, together with 0.24 g Fmoc-Gly-OH (0.75 mmol, 3 eq.), 0.10 g HOBt (0.75 mmol, 3 eq.), 0.23 mL DIC (1.5 mmol, 6 eq.) and 2.5 mL DMF to generate a concentration of 0.30 M. The coupling reaction was run for 4 hours and a negative ninhydrin test was used to confirm the reaction was complete. The reaction mixture was then drained to produce Resin-O-Lys(Boc)-Phe-Tyr(t-Bu)-Ser(Trt)-Asn(Trt)-Gly-NHFmoc. The Fmoc protecting group was removed following the *Fmoc Removal* procedure and a positive ninhydrin test was used to confirm complete removal, producing Resin-O-Lys(Boc)-Phe-Tyr(t-Bu)-Ser(Trt)-Asn(Trt)-Gly-NH<sub>2</sub>.

#### HO-Lys(Boc)-Phe-Tyr(t-Bu)-Ser(Trt)-Asn(Trt)-NH<sub>2</sub>

The linear pentapeptide HO-Lys(Boc)-Phe-Tyr(t-Bu)-Ser(Trt)-Asn(Trt)-NH<sub>2</sub> was generated following the *Cleavage* procedure. The linear peptide was cleaved from the resin using a mixed solution of 3.6 mL of TFE and 3.6 mL of  $\text{CH}_2\text{Cl}_2$ . The resin-containing solution was filtered and dried *in vacuo* to yield HO-Lys(Boc)-Phe-Tyr(t-Bu)-Ser(Trt)-Asn(Trt)-NH<sub>2</sub> as a white solid (286 mg, overall 87%).

#### HO-Lys-Phe-Tyr-Ser-Asn-Gly-NH<sub>2</sub>

The free linear peptide HO-Lys-Phe-Tyr-Ser-Asn-Gly-NH<sub>2</sub> was generated by removing the side chain protecting groups on HO-Lys(Boc)-Phe-Tyr(t-Bu)-Ser(Trt)-Asn(Trt)-Gly-NH<sub>2</sub>. 70 mg HO-Lys(Boc)-Phe-Tyr(t-Bu)-Ser(Trt)-

## Supporting Information

Asn(Trt)-NH<sub>2</sub> (0.05 mmol, 1 eq.) was deprotected using a mixture of 280  $\mu$ L of TFA and anisole (8 eq.). The free linear peptide then underwent HPLC purification to generate pure final compound **6.1 LIN** in a 29% yield as a white solid.

LC/MS (ESI)  $m/z$ : [M+2H]<sup>2+</sup> calcd for C<sub>33</sub>H<sub>46</sub>N<sub>8</sub>O<sub>10</sub>, 358.17; found, 357.95.

HRMS (ESI-TOF)  $m/z$ : [M+H]<sup>+</sup> calcd for C<sub>33</sub>H<sub>46</sub>N<sub>8</sub>O<sub>10</sub>, 715.3300; found, 715.3412.

<sup>1</sup>H NMR (600 MHz, D<sub>2</sub>O)  $\delta$  7.56-7.38 (m, 5H, Phe), 7.25-7.17 (d,  $J$  = 8.40 Hz, 2H,  $\delta$ H Tyr), 7.01-6.93 (d,  $J$  = 8.40 Hz, 2H,  $\epsilon$ H Tyr), 4.97-4.92 (t,  $J$  = 7.20 Hz, 1H,  $\alpha$ H Asn), 4.59-4.53 (t,  $J$  = 5.58 Hz, 1H,  $\alpha$ H Ser), 4.31-4.25 (t,  $J$  = 6.66 Hz, 1H,  $\alpha$ H Lys), 4.02-3.94 (m, 2H,  $\alpha$ CH<sub>2</sub> Gly), 3.94-3.86 (m, 2H,  $\beta$ CH<sub>2</sub> Ser), 3.37-3.29 & 3.21-3.09 (m, 2H,  $\beta$ CH<sub>2</sub> Phe), 3.21-3.09 (m, 2H,  $\epsilon$ CH<sub>2</sub> Lys), 3.21-3.09 & 2.97-2.86 (m, 2H,  $\beta$ CH<sub>2</sub> Tyr), 2.97-2.86 (qd,  $J$  = 5.70, 15.75 Hz, 2H,  $\beta$ CH<sub>2</sub> Asn), 2.00-1.91 & 1.91-1.78 (m, 2H,  $\beta$ CH<sub>2</sub> Lys), 1.91-1.78 (m, 2H,  $\delta$ CH<sub>2</sub> Lys), 1.63-1.47 (m, 2H,  $\gamma$ CH<sub>2</sub> Lys).

### Experimental Procedures for 6.1 CYC

#### **cyclo-Lys(Boc)-Phe-Tyr(t-Bu)-Ser(Trt)-Asn(Trt)-Gly**

*cyclo*-Lys(Boc)-Phe-Tyr(t-Bu)-Ser(Trt)-Asn(Trt)-Gly was synthesised using 0.10 g HO-Lys(Boc)-Phe-Tyr(t-Bu)-Ser(Trt)-Asn(Trt)-Gly-NH<sub>2</sub> (0.074 mmol, 1 eq.), 0.028 g HATU (0.074 mmol, 1 eq.), 0.012 g TBTU (0.037 mmol, 0.5 eq.), 0.011 g DMTMM (0.037 mmol, 0.5 eq.), 0.10 mL DIPEA (0.59 mmol, 8 eq.) in anhydrous CH<sub>2</sub>Cl<sub>2</sub> (74 mL, 0.001 M) following the *General Procedure for Synthesis of Cyclic Peptides*. The reaction was allowed to stir overnight and the reaction was monitored *via* LC/MS. Once complete, the reaction mixture was subjected to an acid-base work-up before drying over Na<sub>2</sub>SO<sub>4</sub>, filtering, evaporating under reduced pressure and drying *in vacuo* to yield crude *cyclo*-Lys(Boc)-Phe-Tyr(t-Bu)-Ser(Trt)-Asn(Trt)-Gly.

#### **cyclo-Lys-Phe-Tyr-Ser-Asn-Gly**

The free cyclic peptide *cyclo*-Lys-Phe-Tyr-Ser-Asn-Gly was generated by removing the side chain protecting groups on *cyclo*-Lys(Boc)-Phe-Tyr(t-Bu)-Ser(Trt)-Asn(Trt)-Gly. 56 mg *cyclo*-Lys(Boc)-Phe-Tyr(t-Bu)-Ser(Trt)-Asn(Trt)-Gly (0.042 mmol, 1 eq.) was deprotected using a mixture of 224  $\mu$ L of TFA and anisole (8 eq.). The free cyclic peptide then underwent HPLC purification to generate pure final compound **6.1 CYC** in a 40% yield as a white solid.

LC/MS (ESI)  $m/z$ : [M+H]<sup>+</sup> calcd for C<sub>33</sub>H<sub>44</sub>N<sub>8</sub>O<sub>9</sub>, 697.32; found, 696.85.

HRMS (ESI-TOF)  $m/z$ : [M+H]<sup>+</sup> calcd for C<sub>33</sub>H<sub>44</sub>N<sub>8</sub>O<sub>9</sub>, 697.3200; found, 697.3301.

<sup>1</sup>H NMR (600 MHz, D<sub>2</sub>O)  $\delta$  7.49-7.16 (m, 5H, Phe), 7.16-6.91 (m, 2H,  $\delta$ H Tyr), 6.91-6.78 (m, 2H,  $\epsilon$ H Tyr), 4.85-4.79 (t,  $J$  = 5.58 Hz, 1H,  $\alpha$ H Asn), 4.49-4.43 (m, 1H,  $\alpha$ H Phe), 4.43-4.38 (t,  $J$  = 4.98 Hz, 1H,  $\alpha$ H Tyr), 4.21-4.16 (t,  $J$  = 7.03 Hz, 1H,  $\alpha$ H Ser), 4.14-4.05 (m, 1H,  $\alpha$ H Lys), 3.85-3.72 (m, 2H,  $\alpha$ CH<sub>2</sub> Gly), 3.85-3.72 (m, 2H,  $\beta$ CH<sub>2</sub> Ser), 3.30-3.22 & 3.13-3.03 (m, 2H,  $\beta$ CH<sub>2</sub> Phe), 2.97-2.70 (m, 2H,  $\epsilon$ CH<sub>2</sub> Lys), 2.97-2.70 (m, 2H,  $\beta$ CH<sub>2</sub> Tyr), 2.97-2.70 (m, 2H,  $\beta$ CH<sub>2</sub> Asn), 1.91-1.77 (m, 2H,  $\beta$ CH<sub>2</sub> Lys), 1.77-1.63 (m, 2H,  $\delta$ CH<sub>2</sub> Lys), 1.46-1.27 (m, 2H,  $\gamma$ CH<sub>2</sub> Lys).



## Supporting Information

### Synthesis of 7.1 LIN and 7.1 CYC

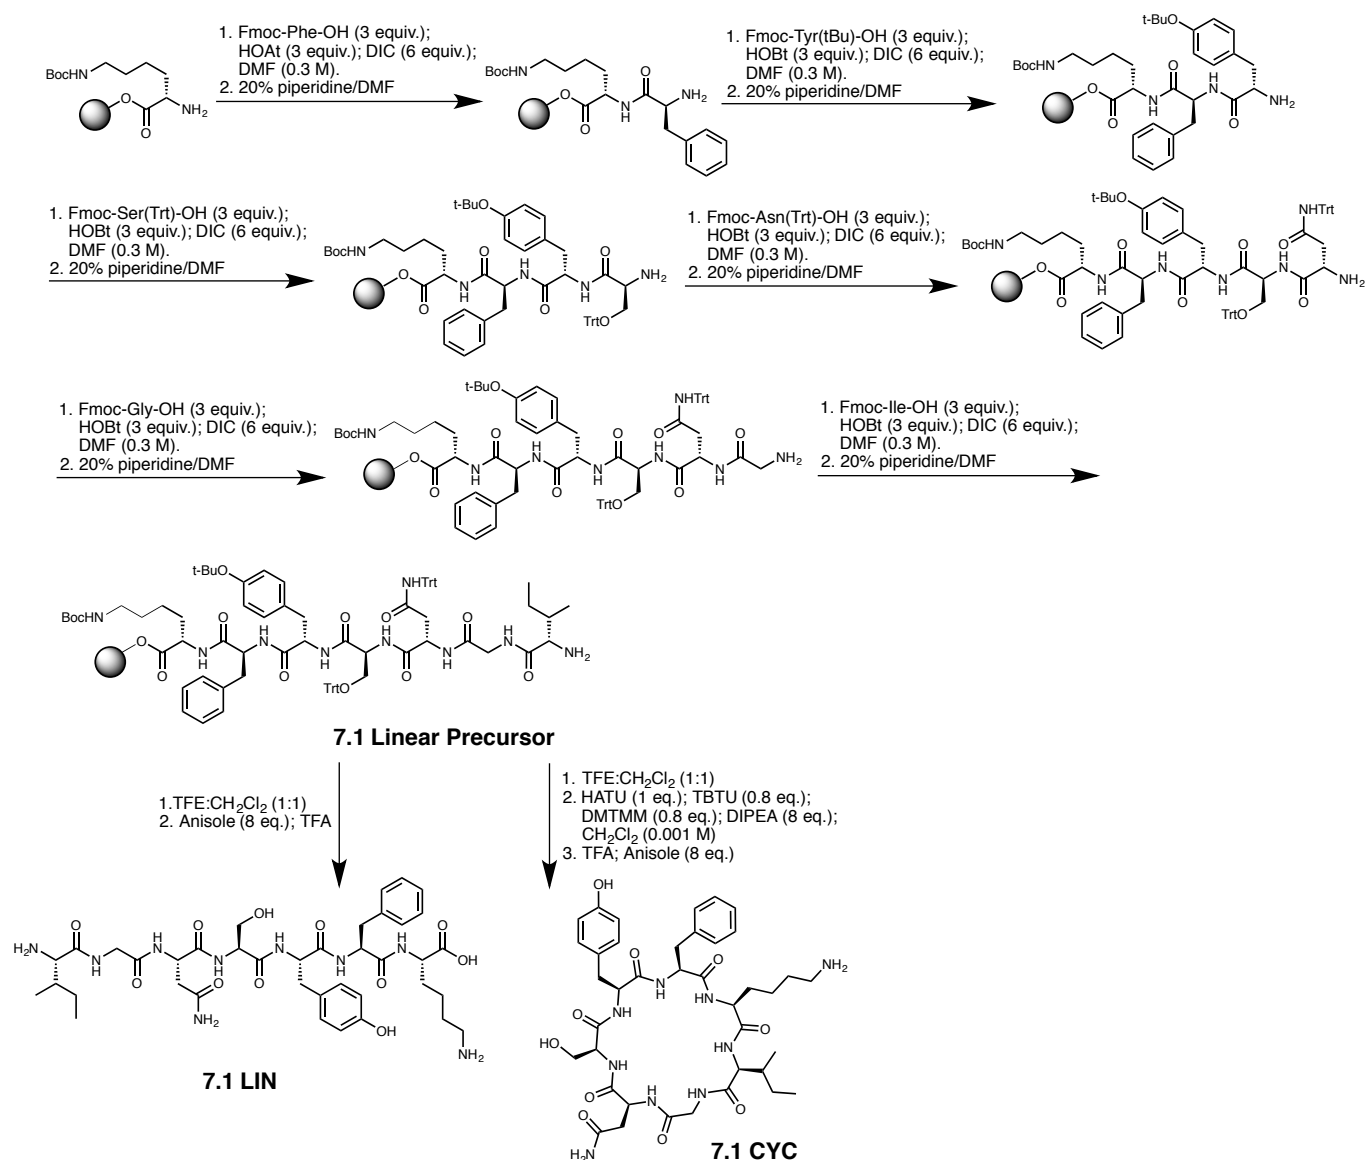

### Experimental Procedures for 7.1 LIN

#### Resin-O-Lys(Boc)-Phe-Tyr(t-Bu)-Ser(Trt)-Asn(Trt)-NH<sub>2</sub>

Resin-bound pentapeptide Resin-O-Lys(Boc)-Phe-Tyr(t-Bu)-Ser(Trt)-Asn(Trt)-NH<sub>2</sub> was synthesised as described for compound **5.1 LIN**.

#### Resin-O-Lys(Boc)-Phe-Tyr(t-Bu)-Ser(Trt)-Asn(Trt)-Gly-NH<sub>2</sub>

The resin-bound hexapeptide Resin-O-Lys(Boc)-Phe-Tyr(t-Bu)-Ser(Trt)-Asn(Trt)-Gly-NH<sub>2</sub> was synthesised following the *Coupling Reaction* procedure using Resin-O-Lys(Boc)-Phe-Tyr(t-Bu)-Ser(Trt)-Asn(Trt)-NH<sub>2</sub> synthesised from the previous coupling reaction, together with 0.45 g Fmoc-Gly-OH (1.5 mmol, 3 eq.), 0.20 g HOBT (1.5 mmol, 3 eq.), 0.46 mL DIC (3.0 mmol, 6 eq.) and 5.0 mL DMF to generate a concentration of 0.30 M. The coupling reaction was run for 4 hours and a negative ninhydrin test was used to confirm the reaction was complete. The reaction mixture was then drained to produce Resin-O-Lys(Boc)-Phe-Tyr(t-Bu)-Ser(Trt)-Asn(Trt)-Gly-NHFmoc. The Fmoc protecting group was removed following the *Fmoc Removal* procedure and a positive ninhydrin test was used to confirm complete removal, producing Resin-O-Lys(Boc)-Phe-Tyr(t-Bu)-Ser(Trt)-Asn(Trt)-Gly-NH<sub>2</sub>.

#### Resin-O-Lys(Boc)-Phe-Tyr(t-Bu)-Ser(Trt)-Asn(Trt)-Gly-Ile-NH<sub>2</sub>

The resin-bound heptapeptide Resin-O-Lys(Boc)-Phe-Tyr(t-Bu)-Ser(Trt)-Asn(Trt)-Gly-Ile-NH<sub>2</sub> was synthesised following the *Coupling Reaction* procedure using Resin-O-Lys(Boc)-Phe-Tyr(t-Bu)-Ser(Trt)-Asn(Trt)-Gly-NH<sub>2</sub> synthesised from the previous coupling reaction, together with 0.53 g Fmoc-Ile-OH (1.5 mmol, 3 eq.), 0.20 g HOBT (1.5 mmol, 3 eq.), 0.46 mL DIC (3.0 mmol, 6 eq.) and 5.0 mL DMF to generate a concentration of 0.30 M. The

## Supporting Information

coupling reaction was run for 4 hours and a negative ninhydrin test was used to confirm the reaction was complete. The reaction mixture was then drained to produce Resin-O-Lys(Boc)-Phe-Tyr(t-Bu)-Ser(Trt)-Asn(Trt)-Gly-Ile-NHFmoc. The Fmoc protecting group was removed following the *Fmoc Removal* procedure and a positive ninhydrin test was used to confirm complete removal, producing Resin-O-Lys(Boc)-Phe-Tyr(t-Bu)-Ser(Trt)-Asn(Trt)-Gly-Ile-NH<sub>2</sub>.

The resin-bound pentapeptide was then divided into 2 equal portions of 1.4 g, where one part was reserved for the synthesis of the 8.1 compound series and the other was taken forward to complete the synthesis of the 7.1 compound series.

### HO-Lys(Boc)-Phe-Tyr(t-Bu)-Ser(Trt)-Asn(Trt)-Gly-Ile-NH<sub>2</sub>

The linear heptapeptide HO-Lys(Boc)-Phe-Tyr(t-Bu)-Ser(Trt)-Asn(Trt)-Gly-Ile-NH<sub>2</sub> was generated following the *Cleavage* procedure. The linear peptide was cleaved from the resin using a mixed solution of 3.1 mL of TFE and 3.1 mL of CH<sub>2</sub>Cl<sub>2</sub>. The resin-containing solution was filtered and dried *in vacuo* to yield HO-Lys(Boc)-Phe-Tyr(t-Bu)-Ser(Trt)-Asn(Trt)-Gly-Ile-NH<sub>2</sub> as a white solid (255 mg, overall 68%).

### HO-Lys-Phe-Tyr-Ser-Asn-Gly-Ile-NH<sub>2</sub>

The free linear peptide HO-Lys-Phe-Tyr-Ser-Asn-Gly-Ile-NH<sub>2</sub> was generated by removing the side chain protecting groups on HO-Lys(Boc)-Phe-Tyr(t-Bu)-Ser(Trt)-Asn(Trt)-Gly-Ile-NH<sub>2</sub>. 62 mg HO-Lys(Boc)-Phe-Tyr(t-Bu)-Ser(Trt)-Asn(Trt)-Gly-Ile-NH<sub>2</sub> (0.04 mmol, 1 eq.) was deprotected using a mixture of 250  $\mu$ L of TFA and anisole (8 eq.). The free linear peptide then underwent HPLC purification to generate pure final compound **7.1 LIN** in a 48% yield as a white solid.

LC/MS (ESI) *m/z*: [M+2H]<sup>2+</sup> calcd for C<sub>39</sub>H<sub>57</sub>N<sub>9</sub>O<sub>11</sub>, 414.71; found, 414.55.

HRMS (ESI-TOF) *m/z*: [M+H]<sup>+</sup> calcd for C<sub>39</sub>H<sub>57</sub>N<sub>9</sub>O<sub>11</sub>, 828.42; found, 828.4255.

<sup>1</sup>H NMR (600 MHz, D<sub>2</sub>O)  $\delta$  7.56-7.28 (m, 5H, Phe), 7.21-7.15 (d, *J* = 8.04 Hz, 2H,  $\delta$ H Tyr), 7.02-6.93 (m, 2H,  $\epsilon$ H Tyr), 4.91-4.86 (t, *J* = 6.49 Hz, 1H,  $\alpha$ H Asn), 4.57-4.51 (t, *J* = 5.52 Hz, 1H,  $\alpha$ H Ser), 4.31-4.24 (m, 1H,  $\alpha$ H Lys), 4.22-4.15 (m, 2H,  $\alpha$ CH<sub>2</sub> Gly), 4.06-4.00 (m, 1H,  $\alpha$ H Ile), 3.96-3.85 (m, 2H,  $\beta$ CH<sub>2</sub> Ser), 3.39-3.33 & 3.18-3.05 (m, 2H,  $\beta$ CH<sub>2</sub> Phe), 3.18-3.05 (m, 2H,  $\epsilon$ CH<sub>2</sub> Lys), 3.18-2.97 (m, 2H,  $\beta$ CH<sub>2</sub> Tyr), 2.97-2.85 (m, 2H,  $\beta$ CH<sub>2</sub> Asn), 2.16-2.07 (m, 1H,  $\beta$ H Ile), 2.00-1.90 & 1.90-1.79 (m, 2H,  $\beta$ CH<sub>2</sub> Lys), 1.90-1.79 (m, 2H,  $\delta$ CH<sub>2</sub> Lys), 1.73-1.65 & 1.46-1.36 (m, 2H,  $\delta$ CH<sub>3</sub> Ile), 1.59-1.36 (m, 2H,  $\gamma$ CH<sub>2</sub> Lys), 1.19-1.12 (d, *J* = 6.90 Hz, 3H,  $\gamma$ CH<sub>2</sub> Ile), 1.11-1.00 (m, 3H,  $\gamma$ CH<sub>3</sub> Ile).

## Experimental Procedures for 7.1 CYC

### *cyclo*-Lys(Boc)-Phe-Tyr(t-Bu)-Ser(Trt)-Asn(Trt)-Gly-Ile

*cyclo*-Lys(Boc)-Phe-Tyr(t-Bu)-Ser(Trt)-Asn(Trt)-Gly-Ile was synthesised using 0.10 g HO-Lys(Boc)-Phe-Tyr(t-Bu)-Ser(Trt)-Asn(Trt)-Gly-NH<sub>2</sub> (0.068 mmol, 1 eq.), 0.029 g HATU (0.068 mmol, 1 eq.), 0.014 g TBTU (0.034 mmol, 0.5 eq.), 0.012 g DMTMM (0.034 mmol, 0.5 eq.), 0.10 mL DIPEA (0.55 mmol, 8 eq.) in anhydrous CH<sub>2</sub>Cl<sub>2</sub> (68 mL, 0.001 M) following the *General Procedure for Synthesis of Cyclic Peptides*. The reaction was allowed to stir overnight and the reaction was monitored *via* LC/MS. Once complete, the reaction mixture was subjected to an acid-base work-up before drying over Na<sub>2</sub>SO<sub>4</sub>, filtering, evaporating under reduced pressure and drying *in vacuo* to yield crude *cyclo*-Lys(Boc)-Phe-Tyr(t-Bu)-Ser(Trt)-Asn(Trt)-Gly-Ile.

### *cyclo*-Lys-Phe-Tyr-Ser-Asn-Gly-Ile

The free cyclic peptide *cyclo*-Lys-Phe-Tyr-Ser-Asn-Gly-Ile was generated by removing the side chain protecting groups on *cyclo*-Lys(Boc)-Phe-Tyr(t-Bu)-Ser(Trt)-Asn(Trt)-Gly-Ile. 62 mg *cyclo*-Lys(Boc)-Phe-Tyr(t-Bu)-Ser(Trt)-Asn(Trt)-Gly-Ile (0.043 mmol, 1 eq.) was deprotected using a mixture of 250  $\mu$ L of TFA and anisole (8 eq.). The free cyclic peptide then underwent HPLC purification to generate pure final compound **7.1 CYC** in a 30% yield as a white solid.

LC/MS (ESI) *m/z*: [M+H]<sup>+</sup> calcd for C<sub>39</sub>H<sub>55</sub>N<sub>9</sub>O<sub>10</sub>, 810.41; found, 810.05.

HRMS (ESI-TOF) *m/z*: [M+H]<sup>+</sup> calcd for C<sub>39</sub>H<sub>55</sub>N<sub>9</sub>O<sub>10</sub>, 810.0500; found, 810.4141.

<sup>1</sup>H NMR (600 MHz, D<sub>2</sub>O)  $\delta$  7.52-7.13 (m, 5H, Phe), 7.13-6.90 (m, 2H,  $\delta$ H Tyr), 6.90-6.74 (m, 2H,  $\epsilon$ H Tyr), 4.88-4.82 (t, *J* = 6.66 Hz, 1H,  $\alpha$ H Asn), 4.57-4.52 (dd, *J* = 5.52, 9.90 Hz, 1H,  $\alpha$ H Phe), 4.49-4.44 & 4.41-4.35 (t, *J* = 4.80 Hz, 1H,  $\alpha$ H Tyr), 4.32-4.21 (m, 2H,  $\alpha$ CH<sub>2</sub> Gly), 4.32-4.21 (m, 2H,  $\alpha$ H Lys), 4.21-4.05 (m, 1H,  $\alpha$ H Ile), 4.05-3.65 (m, 2H,  $\beta$ CH<sub>2</sub> Ser), 3.33-3.22 & 3.12-2.67 (m, 2H,  $\beta$ CH<sub>2</sub> Phe), 3.12-2.67 (m, 2H,  $\epsilon$ CH<sub>2</sub> Lys), 3.12-2.67 (m, 2H,  $\beta$ CH<sub>2</sub> Tyr), 3.12-2.67 (m, 2H,  $\beta$ CH<sub>2</sub> Asn), 1.98-1.77 (m, 1H,  $\beta$ H Ile), 1.98-1.77 (m, 2H,  $\beta$ CH<sub>2</sub> Lys), 1.77-1.63 (m, 2H,  $\delta$ CH<sub>2</sub> Lys), 1.63-1.51 & 1.45-1.21 (m, 2H,  $\gamma$ CH<sub>2</sub> Ile), 1.45-1.21 (m, 2H,  $\gamma$ CH<sub>2</sub> Lys), 1.10-0.83 (m, 3H,  $\delta$ CH<sub>3</sub> Ile), 1.10-0.83 (m, 3H,  $\gamma$ CH<sub>3</sub> Ile).

## Supporting Information

### Synthesis of 8.1 LIN and 8.1 CYC

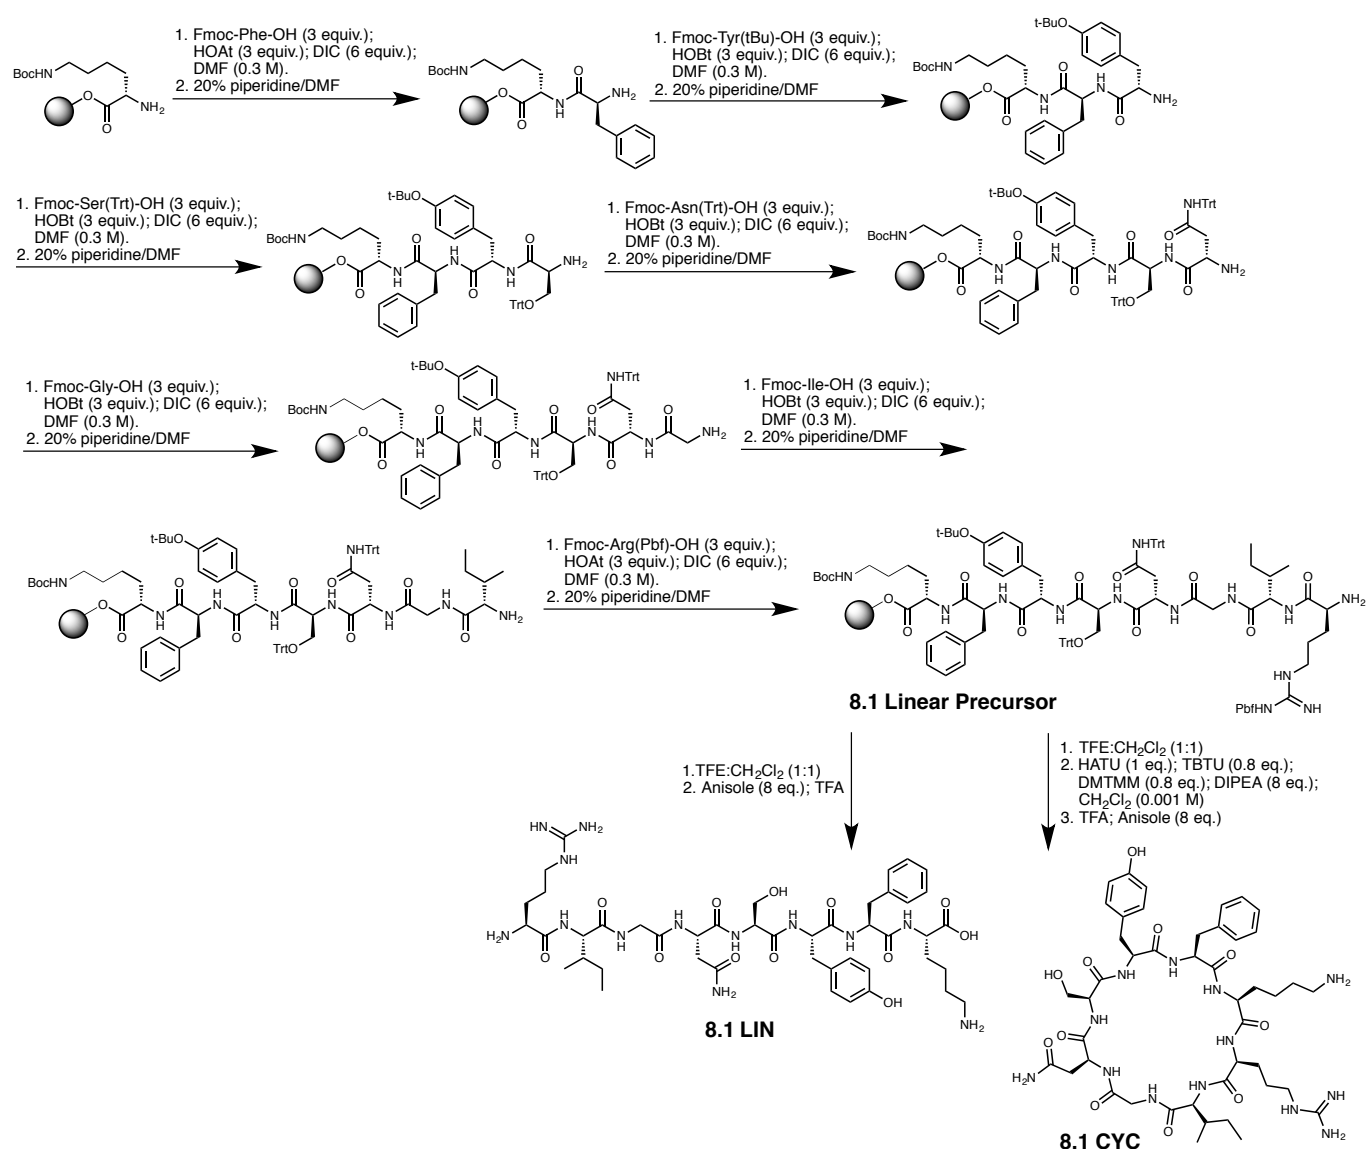

### Experimental Procedures for 8.1 LIN

#### Resin-O-Lys(Boc)-Phe-Tyr(t-Bu)-Ser(Trt)-Asn(Trt)-Gly-Ile-Arg(Pbf)-NH<sub>2</sub>

The resin-bound octapeptide Resin-O-Lys(Boc)-Phe-Tyr(t-Bu)-Ser(Trt)-Asn(Trt)-Gly-Ile-Arg(Pbf)-NH<sub>2</sub> was synthesised following the *Coupling Reaction* procedure using 1.4 g Resin-O-Lys(Boc)-Phe-Tyr(t-Bu)-Ser(Trt)-Asn(Trt)-Gly-Ile-NH<sub>2</sub> (0.25 mmol, 1 eq.) reserved from the synthesis of 7.1 LIN, together with 0.49 g Fmoc-Arg(Pbf)-OH (0.75 mmol, 3 eq.), 0.10 g HOAt (0.75 mmol, 3 eq.), 0.23 mL DIC (1.5 mmol, 6 eq.) and 2.5 mL DMF to generate a concentration of 0.30 M. The coupling reaction was run overnight and a negative ninhydrin test was used to confirm the reaction was complete. The reaction mixture was then drained to produce Resin-O-Lys(Boc)-Phe-Tyr(t-Bu)-Ser(Trt)-Asn(Trt)-Gly-Ile-Arg(Pbf)-NH<sub>2</sub>Fmoc. The Fmoc protecting group was removed following the *Fmoc Removal* procedure and a positive ninhydrin test was used to confirm complete removal, producing Resin-O-Lys(Boc)-Phe-Tyr(t-Bu)-Ser(Trt)-Asn(Trt)-Gly-Ile-Arg(Pbf)-NH<sub>2</sub>.

#### HO-Lys(Boc)-Phe-Tyr(t-Bu)-Ser(Trt)-Asn(Trt)-NH<sub>2</sub>

The linear octapeptide HO-Lys(Boc)-Phe-Tyr(t-Bu)-Ser(Trt)-Asn(Trt)-Gly-Ile-Arg(Pbf)-NH<sub>2</sub> was generated following the *Cleavage* procedure. The linear peptide was cleaved from the resin using a mixed solution of 3.7 mL of TFE and 3.7 mL of CH<sub>2</sub>Cl<sub>2</sub>. The resin-containing solution was filtered and dried *in vacuo* to yield HO-Lys(Boc)-Phe-Tyr(t-Bu)-Ser(Trt)-Asn(Trt)-Gly-Ile-Arg(Pbf)-NH<sub>2</sub> as a white solid (364 mg, overall 77%).

#### HO-Lys-Phe-Tyr-Ser-Asn-Gly-NH<sub>2</sub>

## Supporting Information

The free linear peptide HO-Lys-Phe-Tyr-Ser-Asn-Gly-Ile-Arg-NH<sub>2</sub> was generated by removing the side chain protecting groups on HO-Lys(Boc)-Phe-Tyr(t-Bu)-Ser(Trt)-Asn(Trt)-Gly-Ile-Arg(Pbf)-NH<sub>2</sub>. 62 mg HO-Lys(Boc)-Phe-Tyr(t-Bu)-Ser(Trt)-Asn(Trt)-Gly-Ile-Arg(Pbf)-NH<sub>2</sub> (0.033 mmol, 1 eq.) was deprotected using a mixture of 250  $\mu$ L of TFA and anisole (8 eq.). The free linear peptide then underwent HPLC purification to generate pure final compound **8.1 LIN** in a 32% yield as a white solid.

LC/MS (ESI)  $m/z$ : [M+2H]<sup>2+</sup> calcd for C<sub>45</sub>H<sub>69</sub>N<sub>13</sub>O<sub>12</sub>, 492.76; found, 492.70.

HRMS (ESI-TOF)  $m/z$ : [M+2H]<sup>2+</sup> calcd for C<sub>45</sub>H<sub>69</sub>N<sub>13</sub>O<sub>12</sub>, 492.7600; found, 492.7666.

<sup>1</sup>H NMR (600 MHz, D<sub>2</sub>O)  $\delta$  7.55-7.35 (m, 5H, Phe), 7.22-7.14 (d,  $J$  = 8.53 Hz, 2H,  $\delta$ H Tyr), 6.99-6.93 (d,  $J$  = 8.41 Hz, 2H,  $\epsilon$ H Tyr), 4.90-4.86 (t,  $J$  = 6.58 Hz, 1H,  $\alpha$ H Asn), 4.56-4.51 (t,  $J$  = 5.46 Hz, 1H,  $\alpha$ H Ser), 4.42-4.38 (d,  $J$  = 7.74 Hz, 1H,  $\alpha$ H Ile), 4.31-4.23 (t,  $J$  = 7.27 Hz, 1H,  $\alpha$ H Lys), 4.21-4.09 (m, 1H,  $\alpha$ H Arg), 4.21-4.09 (m, 2H,  $\alpha$ CH<sub>2</sub> Gly), 3.95-3.85 (m, 2H,  $\beta$ CH<sub>2</sub> Ser), 3.37-3.29 (m, 2H,  $\delta$ CH<sub>2</sub> Arg), 3.37-3.29 & 3.20-2.85 (m, 2H,  $\beta$ CH<sub>2</sub> Phe), 3.20-2.85 (m, 2H,  $\epsilon$ CH<sub>2</sub> Lys), 3.20-2.85 (m, 2H,  $\beta$ CH<sub>2</sub> Tyr), 3.20-2.85 (m, 2H,  $\beta$ CH<sub>2</sub> Asn), 2.08-1.99 (m, 1H,  $\beta$ H Ile), 2.08-1.99 (m, 2H,  $\beta$ CH<sub>2</sub> Arg), 1.99-1.90 & 1.88-1.73 (m, 2H,  $\beta$ CH<sub>2</sub> Lys), 1.88-1.73 (m, 2H,  $\delta$ CH<sub>2</sub> Lys), 1.88-1.73 (m, 2H,  $\gamma$ CH<sub>2</sub> Arg), 1.71-1.63 & 1.42-1.33 (m, 2H,  $\gamma$ CH<sub>2</sub> Ile), 1.58-1.47 (m, 2H,  $\gamma$ CH<sub>2</sub> Lys), 1.12-1.07 (d,  $J$  = 6.78 Hz, 3H,  $\delta$ CH<sub>3</sub> Ile), 1.07-1.00 (t,  $J$  = 7.38 Hz, 3H,  $\gamma$ CH<sub>3</sub> Ile).

### Experimental Procedures for 8.1 CYC

#### **cyclo-Lys(Boc)-Phe-Tyr(t-Bu)-Ser(Trt)-Asn(Trt)-Gly-Ile-Arg(Pbf)**

*cyclo-Lys(Boc)-Phe-Tyr(t-Bu)-Ser(Trt)-Asn(Trt)-Gly-Ile-Arg(Pbf)* was synthesised using 0.15 g HO-Lys(Boc)-Phe-Tyr(t-Bu)-Ser(Trt)-Asn(Trt)-Gly-NH<sub>2</sub> (0.080 mmol, 1 eq.), 0.033 g HATU (0.080 mmol, 1 eq.), 0.014 g TBTU (0.040 mmol, 0.5 eq.), 0.012 g DMTEA (0.040 mmol, 0.5 eq.), 0.11 mL DIPEA (0.64 mmol, 8 eq.) in anhydrous CH<sub>2</sub>Cl<sub>2</sub> (80 mL, 0.001 M) following the *General Procedure for Synthesis of Cyclic Peptides*. The reaction was allowed to stir overnight and the reaction was monitored *via* LC/MS. Once complete, the reaction mixture was subjected to an acid-base work-up before drying over Na<sub>2</sub>SO<sub>4</sub>, filtering, evaporating under reduced pressure and drying *in vacuo* to yield crude *cyclo-Lys(Boc)-Phe-Tyr(t-Bu)-Ser(Trt)-Asn(Trt)-Gly-Ile-Arg(Pbf)*.

#### **cyclo-Lys-Phe-Tyr-Ser-Asn-Gly-Ile**

The free cyclic peptide *cyclo-Lys-Phe-Tyr-Ser-Asn-Gly-Ile-Arg* was generated by removing the side chain protecting groups on *cyclo-Lys(Boc)-Phe-Tyr(t-Bu)-Ser(Trt)-Asn(Trt)-Gly-Ile-Arg(Pbf)*. 45 mg *cyclo-Lys(Boc)-Phe-Tyr(t-Bu)-Ser(Trt)-Asn(Trt)-Gly-Ile* (0.024 mmol, 1 eq.) was deprotected using a mixture of 180  $\mu$ L of TFA and anisole (10 eq.). The free cyclic peptide then underwent HPLC purification to generate pure final compound **8.1 CYC** in a 67% yield as a white solid.

LC/MS (ESI)  $m/z$ : [M+2H]<sup>2+</sup> calcd for C<sub>45</sub>H<sub>67</sub>N<sub>13</sub>O<sub>11</sub>, 483.76; found, 483.65.

HRMS (ESI-TOF)  $m/z$ : [M+2H]<sup>2+</sup> calcd for C<sub>45</sub>H<sub>67</sub>N<sub>13</sub>O<sub>11</sub>, 483.7600; found, 483.7610.

<sup>1</sup>H NMR (600 MHz, D<sub>2</sub>O)  $\delta$  7.57-7.20 (m, 5H, Phe), 7.20-6.73 (m, 2H,  $\delta$ H Tyr), 7.20-6.73 (m, 2H,  $\epsilon$ H Tyr), 4.90-4.84 (m, 1H,  $\alpha$ H Asn), 4.55-4.67 (s, br, 1H,  $\alpha$ H Tyr), 4.39-4.35 (t,  $J$  = 5.16 Hz, 1H,  $\alpha$ H Ser), 4.33-4.26 (t,  $J$  = 8.04 Hz, 1H,  $\alpha$ H Lys), 4.21-4.09 (m, 2H,  $\alpha$ CH<sub>2</sub> Gly), 4.05-4.00 (m, 1H,  $\alpha$ H Ile), 4.05-4.00 (m, 1H,  $\alpha$ H Arg), 4.05-3.72 (m, 2H,  $\beta$ CH<sub>2</sub> Ser), 3.45-3.36 & 3.09-2.96 (m, 2H,  $\beta$ CH<sub>2</sub> Phe), 3.31-3.17 (m, 2H,  $\delta$ CH<sub>2</sub> Arg), 3.09-2.96 (m, 2H,  $\epsilon$ CH<sub>2</sub> Lys), 2.96-2.87 (m, 2H,  $\beta$ CH<sub>2</sub> Tyr), 2.87-2.68 (m, 2H,  $\beta$ CH<sub>2</sub> Asn), 2.15-1.88 (m, 1H,  $\beta$ H Ile), 2.15-1.88 (m, 1H,  $\beta$ CH<sub>2</sub> Arg), 1.88-1.59 (m, 2H,  $\beta$ CH<sub>2</sub> Lys), 1.79-1.59 (m, 2H,  $\delta$ CH<sub>2</sub> Lys), 1.59-1.53 & 1.30-1.10 (m, 2H,  $\gamma$ CH<sub>2</sub> Ile), 1.47-1.30 (m, 2H,  $\gamma$ CH<sub>2</sub> Lys), 1.00-0.82 (m, 3H,  $\delta$ CH<sub>3</sub> Ile), 1.00-0.82 (m, 3H,  $\gamma$ CH<sub>3</sub> Ile).

## Supporting Information

### Synthesis of 5.2 LIN and 5.2 CYC

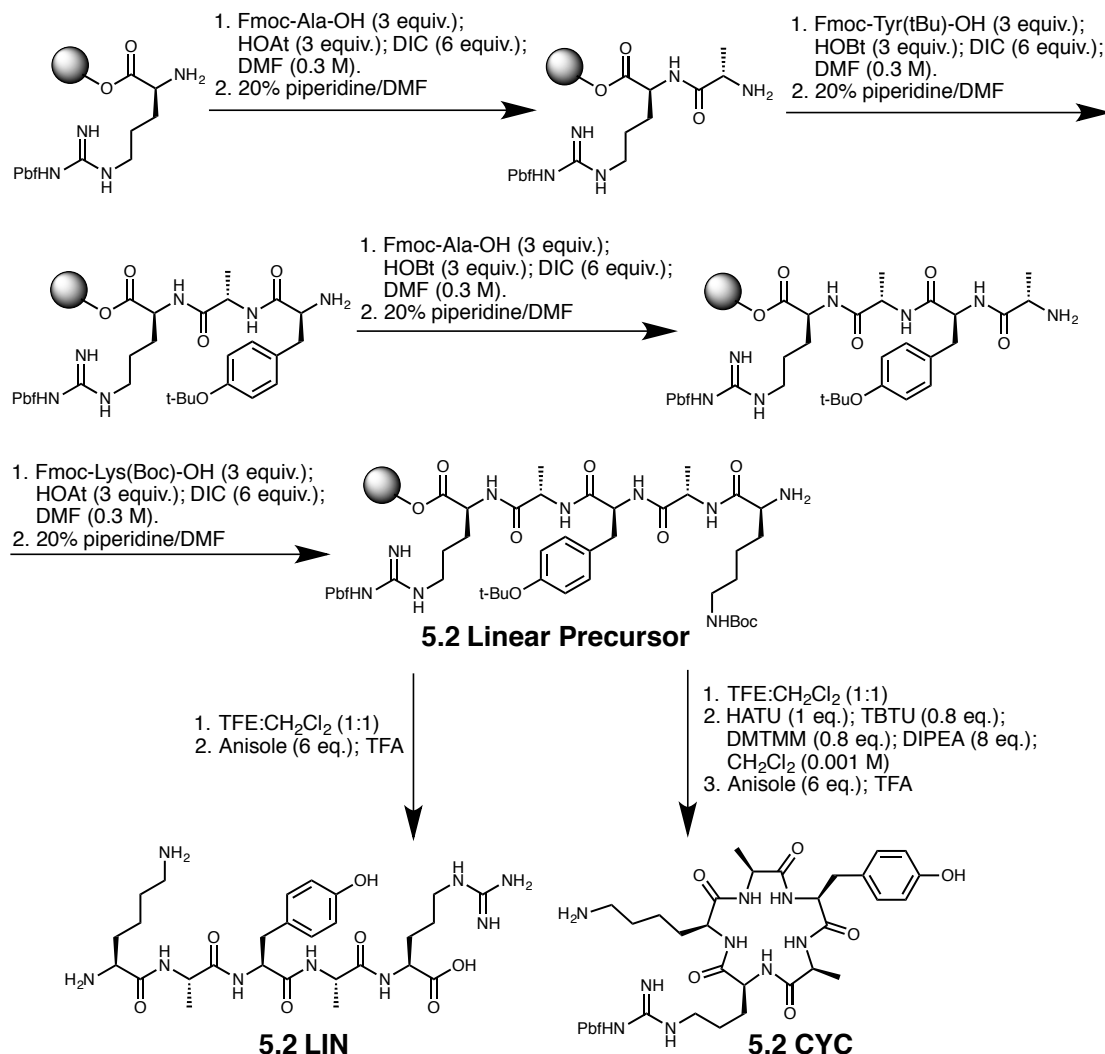

### Experimental Procedures for 5.2 LIN

#### Resin-O-Arg(Pbf)-Ala-NHFmoc

The dipeptide Resin-O-Arg(Pbf)-Ala-NHFmoc was synthesized following the “Solid phase peptide synthesis” procedure utilizing 1.003 g (0.60 mmol, 1.0 equivalent) of Resin-O-Arg(Pbf)-NH<sub>2</sub>, 0.560 g (1.80 mmol, 3.0 equivalents) of HO-Ala-NHFmoc, 245 mg of HOAt (1.80 mmol, 3.0 equivalents), 0.56 mL of DIC (3.60 mmol, 6.0 equivalents) and 3.0 mL of DMF (0.2 M). The reaction was run for 2 hr and a negative ninhydrin test was performed to verify the reaction completion. The reaction mixture was drained to give the Fmoc-protected resin-bound dipeptide.

#### Resin-O-Arg(Pbf)-Ala-NH<sub>2</sub>

The dipeptide Resin-O-Arg(Pbf)-Ala-NH<sub>2</sub> was synthesized following the “Fmoc removal” procedure. A positive ninhydrin test was performed to verify the completion of Fmoc removal.

#### Resin-O-Arg(Pbf)-Ala-Tyr(tBu)-NHFmoc

The tripeptide Resin-O-Arg(Pbf)-Ala-Tyr(tBu)-NHFmoc was synthesized following the “Solid phase peptide synthesis” procedure utilizing 1.003 g (0.60 mmol, 1.0 equivalent) of Resin-O-Arg(Pbf)-Ala-NH<sub>2</sub>, 0.827 g (1.80 mmol, 3.0 equivalents) of HO-Tyr(tBu)-NHFmoc, 243 mg of HOBt (1.80 mmol, 3.0 equivalents), 0.56 mL of DIC (3.60 mmol, 6.0 equivalents) and 3.0 mL of DMF (0.2 M). The reaction was run for 2 hr and a negative ninhydrin test was performed to verify the reaction completion. The reaction mixture was drained to give the Fmoc-protected resin-bound tripeptide.

#### Resin-O-Arg(Pbf)-Ala-Tyr(tBu)-NH<sub>2</sub>

The tripeptide Resin-O-Arg(Pbf)-Ala-Tyr(tBu)-NH<sub>2</sub> was synthesized following the “Fmoc removal” procedure. A positive ninhydrin test was performed to verify the completion of Fmoc removal.

## Supporting Information

### Resin-O-Arg(Pbf)-Ala-Tyr(tBu)-Ala-NHFmoc

The tetrapeptide Resin-O-Arg(Pbf)-Ala-Tyr(tBu)-Ala-NHFmoc was synthesized following the "Solid phase peptide synthesis" procedure utilizing 1.003 g (0.60 mmol, 1.0 equivalent) of Resin-O-Arg(Pbf)-Ala-Tyr(tBu)-NH<sub>2</sub>, 0.560 g (1.80 mmol, 3.0 equivalents) of HO-Ala-NHFmoc, 243 mg of HOBt (1.80 mmol, 3.0 equivalents), 0.56 mL of DIC (3.60 mmol, 6.0 equivalents) and 3.0 mL of DMF (0.2 M). The reaction was run for 2 hr and a negative ninhydrin test was performed to verify the reaction completion. The reaction mixture was drained to give the Fmoc-protected resin-bound tetrapeptide.

### Resin-O-Arg(Pbf)-Ala-Tyr(tBu)-Ala-NH<sub>2</sub>

The tetrapeptide Resin-O-Arg(Pbf)-Ala-Tyr(tBu)-Ala-NH<sub>2</sub> was synthesized following the "Fmoc removal" procedure. A positive ninhydrin test was performed to verify the completion of Fmoc removal.

### Resin-O-Arg(Pbf)-Ala-Tyr(tBu)-Ala-Lys(Boc)-NHFmoc

The pentapeptide Resin-O-Arg(Pbf)-Ala-Tyr(tBu)-Ala-Lys(Boc)-NHFmoc was synthesized following the "Solid phase peptide synthesis" procedure utilizing 1.003 g (0.60 mmol, 1.0 equivalent) of Resin-O-Arg(Pbf)-Ala-Tyr(tBu)-Ala-NH<sub>2</sub>, 0.843 g (1.80 mmol, 3.0 equivalents) of HO-Lys(Boc)-NHFmoc, 245 mg of HOAt (1.80 mmol, 3.0 equivalents), 0.56 mL of DIC (3.60 mmol, 6.0 equivalents) and 3.0 mL of DMF (0.2 M). The reaction was run for 2 hr and a negative ninhydrin test was performed to verify the reaction completion. The reaction mixture was drained to give the Fmoc-protected resin-bound pentapeptide.

### Resin-O-Arg(Pbf)-Ala-Tyr(tBu)-Ala-Lys(Boc)-NH<sub>2</sub>

The pentapeptide Resin-O-Arg(Pbf)-Ala-Tyr(tBu)-Ala-Lys(Boc)-NH<sub>2</sub> was synthesized following the "Fmoc removal" procedure. A positive ninhydrin test was performed to verify the completion of Fmoc removal.

### HO-Arg(Pbf)-Ala-Tyr(tBu)-Ala-Lys(Boc)-NH<sub>2</sub>

The double deprotected linear precursor (DDL P) HO-Arg(Pbf)-Ala-Tyr(tBu)-Ala-Lys(Boc)-NH<sub>2</sub> was synthesized using the resin-bound peptide prepared from previous step following "Linear peptide cleavage from resin" procedure utilizing 3.9 mL of TFE and 3.9 mL of CH<sub>2</sub>Cl<sub>2</sub>. The resulting slurry was filtered and dried *in vacuo* to yield HO-Arg(Pbf)-Ala-Tyr(tBu)-Ala-Lys(Boc)-NH<sub>2</sub> as a pale yellow solid (270 mg, overall 44%).

LC/MS (ESI): *m/z* calculated C<sub>49</sub>H<sub>78</sub>N<sub>9</sub>O<sub>12</sub>S [M + H<sup>+</sup>] = 1016.55, found 1016.20

### HO-Arg-Ala-Tyr-Ala-Lys-NH<sub>2</sub>

The HO-Arg-Ala-Tyr-Ala-Lys-NH<sub>2</sub> was synthesized utilizing 25.0 mg (0.025 mmol, 1.0 equivalent) of the DDL P HO-Arg(Pbf)-Ala-Tyr(tBu)-Ala-Lys(Boc)-NH<sub>2</sub>, 5.00 mL (0.050 mmol, 2.0 equivalents) of Anisole, 0.125 mL of TFA and 0.125 mL of CH<sub>2</sub>Cl<sub>2</sub>. The resulting slurry was dried *in vacuo*. The residue was redissolved in MeOH, and the solution was centrifuged. The supernatant was injected into the HPLC to yield HO-Arg-Ala-Tyr-Ala-Lys-NH<sub>2</sub> (13.2 mg, overall 87%).

LC/MS (ESI): *m/z* calculated C<sub>27</sub>H<sub>46</sub>N<sub>9</sub>O<sub>7</sub> [M + H<sup>+</sup>] = 608.35, found 608.10.

HRMS (ESI-TOF): M+H<sup>+</sup>, found 608.3508 C<sub>27</sub>H<sub>47</sub>N<sub>9</sub>O<sub>7</sub> requires 608.3520

<sup>1</sup>H NMR (600 MHz, CDCl<sub>3</sub>, 298K): δ = 1.22-1.32 (m, 6H, CH<sub>3</sub>β Ala); 1.22-1.35 (m, 2H, CH<sub>2</sub>γ Lys); 1.51-1.62 (m, 2H, CH<sub>2</sub>δ Lys); 1.56-1.65 (m, 2H, CH<sub>2</sub>γ Arg); 1.65-1.73 & 1.81-1.89 (m, 2H, CH<sub>2</sub>β Lys); 1.71-1.81 (m, 2H, CH<sub>2</sub>β Arg); 2.83-2.98 & 3.03-3.08 (m, 2H, CH<sub>2</sub>β Tyr); 2.85-2.93 (m, 2H, CH<sub>2</sub>δ Arg); 3.09-3.18 (m, 2H, CH<sub>2</sub>ε Lys); 3.61-3.66 & 3.84-3.91 (m, 1H, CHα Arg); 4.19-4.33 (m, 2H, CHα Ala); 4.20-4.28 (m, 1H, CHα Lys); 4.41-4.46 & 4.49-4.54 (m, 1H, CHα Tyr); 6.73-6.76 & 7.13-7.17 (d, J = 8.55 Hz, 2H, Ph Tyr); 7.04-7.08 & 7.19-7.23 (d, J = 8.55 Hz, 2H, Ph Tyr).

<sup>13</sup>C NMR (150 MHz, CDCl<sub>3</sub>, 298K): δ = 16.61, 21.06, 24.40, 26.25, 27.90, 30.31, 36.27, 36.66, 38.96, 40.49, 49.28, 52.78, 52.85, 54.35, 54.63, 55.04, 115.37, 121.43, 128.00, 130.52, 154.39, 156.71, 169.10, 172.19, 172.45, 174.08, 175.83

## Experimental Procedures for 5.2 CYC

### cyclo-Arg(Pbf)-Ala-Tyr(tBu)-Ala-Lys(Boc)

The macrocycle Arg(Pbf)-Ala-Tyr(tBu)-Ala-Lys(Boc) was synthesized following the "Syringe pump macrocyclization" procedure utilizing 107 mg (0.105 mmol, 1.0 equivalent) of DDL P HO-Arg(Pbf)-Ala-Tyr(tBu)-Ala-Lys(Boc)-NH<sub>2</sub>, 0.11 mL (0.632 mmol, 6.0 equivalents) of DIPEA, 17 mg (0.053 mmol, 0.5 equivalents) of TBUTU, 40 mg (0.105 mmol, 1.0 equivalents) HATU, and 15 mg (0.053 mmol, 0.5 equivalents) of DMTMM in 105 mL CH<sub>2</sub>Cl<sub>2</sub>. The crude reaction was dried *in vacuo* to yield 126 mg of macrocycle. The macrocycle was taken onto the next reaction without further purification.

### cyclo-Arg-Ala-Tyr-Ala-Lys

Macrocycle Arg-Ala-Tyr-Ala-Lys was synthesized utilizing 126 mg (0.127 mmol, 1.0 equivalent) of the Macrocycle Arg(Pbf)-Ala-Tyr(tBu)-Ala-Lys(Boc), 27.0 mL (0.254 mmol, 2.0 equivalents) of Anisole, 0.65 mL of TFA and 0.65 mL of CH<sub>2</sub>Cl<sub>2</sub>. The resulting slurry was dried *in vacuo*. The residue was redissolved in MeOH, and the solution was

## Supporting Information

centrifuged. The supernatant was injected into the HPLC to yield Macrocycle Arg-Ala-Tyr-Ala-Lys (21.7 mg, overall 17%). LCMS:  $m/z$  calcd for  $C_{27}H_{44}N_9O_6$  ( $M + H^+$ ) = 590.34, found 590.05.

HRMS (ESI-TOF):  $M+H^+$ , found 590.3408  $C_{27}H_{45}N_9O_6$  requires 590.3414

$^1H$  NMR (600 MHz,  $CDCl_3$ , 318K):  $\delta$  = 1.42-1.53 (d,  $J$  = 6.60 Hz, 3H,  $CH_3\beta$  Ala); 1.45-1.51 & 1.59-1.64 (d,  $J$  = 7.23 Hz, 3H,  $CH_3\beta$  Ala); 1.52-1.63 (m, 2H,  $CH_2\gamma$  Lys); 1.73-1.87 (m, 2H,  $CH_2\gamma$  Arg); 1.79-1.90 (m, 2H,  $CH_2\delta$  Lys); 1.97-2.06 (m, 2H,  $CH_2\beta$  Lys); 2.05-2.11 (m, 2H,  $CH_2\beta$  Arg); 3.11-3.19 (m, 2H,  $CH_2\delta$  Arg); 3.19-3.25 & 3.28-3.32 (m, 2H,  $CH_2\beta$  Tyr); 3.30-3.43 & 3.33-3.39 (m, 2H,  $CH_2\epsilon$  Lys); 4.24-4.29 (m, 1H,  $CH\alpha$  Ala); 4.40-4.44 (m, 1H,  $CH\alpha$  Ala); 4.38-4.43 (m, 1H,  $CH\alpha$  Lys); 4.38-4.44 (m, 1H,  $CH\alpha$  Arg); 4.58-4.64 (m, 1H,  $CH\alpha$  Tyr); 7.01-7.06 & 7.24-7.27 (d,  $J$  = 8.77 Hz, 2H, Ph Tyr); 7.32-7.36 & 7.91-7.94 (d,  $J$  = 8.77 Hz, 2H, Ph Tyr).

$^{13}C$  NMR (150 MHz,  $CDCl_3$ , 318K):  $\delta$  = 15.64, 16.63, 22.36, 24.82, 26.27, 27.56, 29.51, 35.43, 39.29, 40.65, 42.64, 50.82, 51.21, 54.17, 54.82, 55.53, 114.37, 115.68, 127.58, 130.78, 154.39, 156.71, 169.10, 172.19, 172.45, 174.08, 175.83

### Synthesis of 6.2 LIN and 6.2 CYC

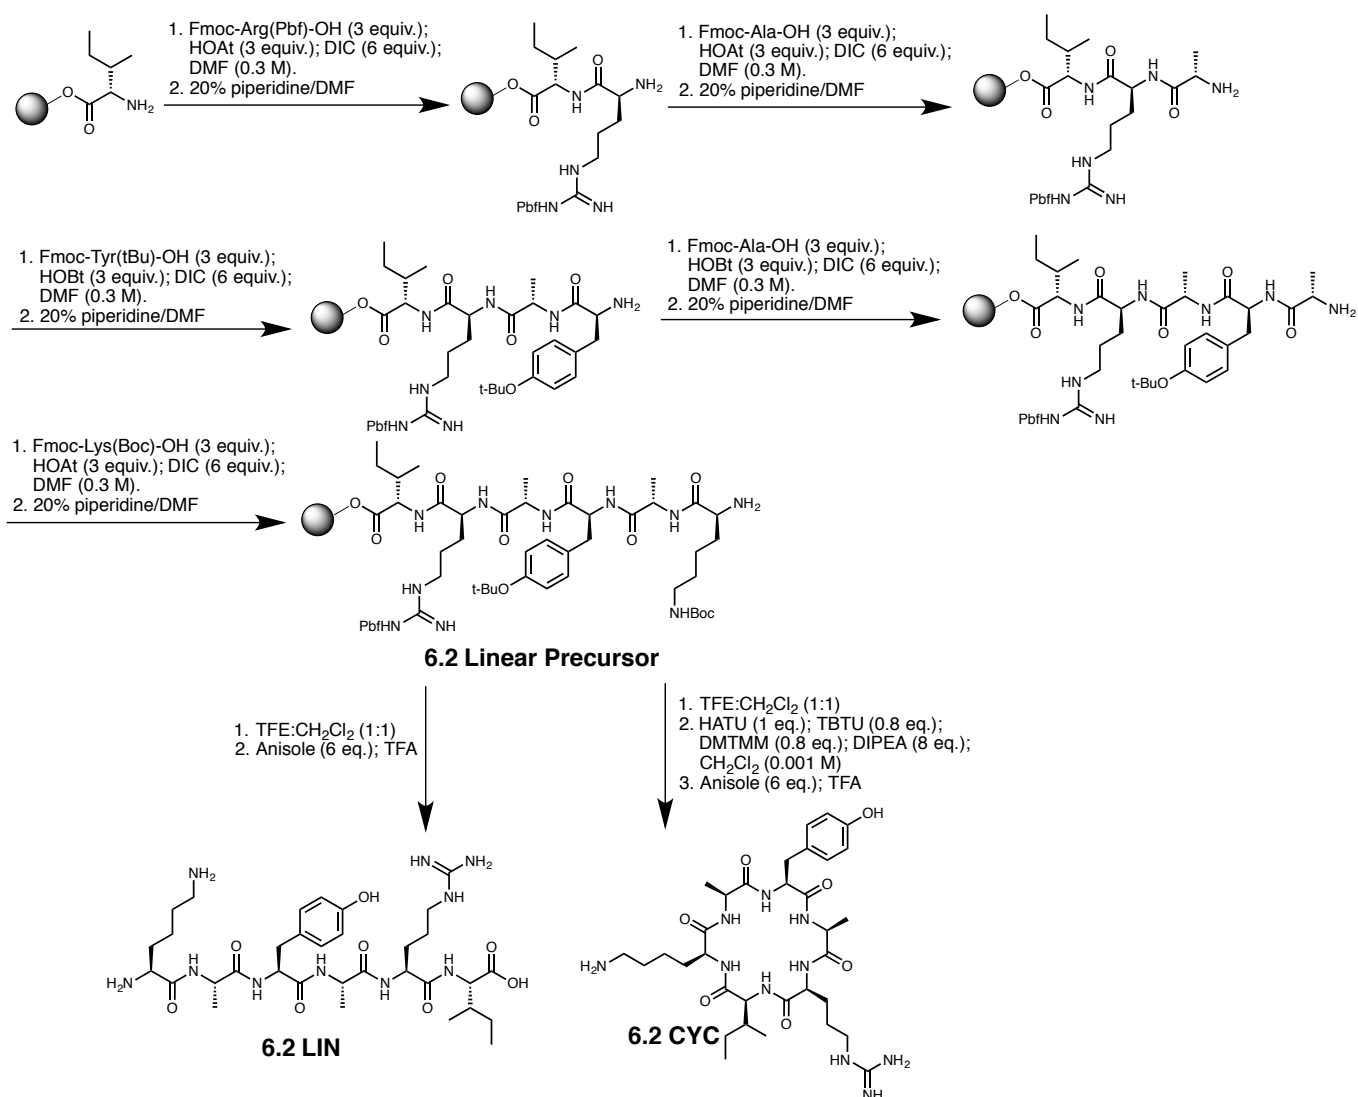

### Experimental Procedures for 6.2 LIN

#### Resin-O-Ile-Arg(Pbf)-NH<sub>2</sub>

The resin-bound dipeptide Resin-O-Ile-Arg(Pbf)-NH<sub>2</sub> was synthesised following the *Coupling Reaction* procedure using 1.00 g H-Ile-2-CITrt resin (0.9 mmol, 1 eq.), 1.75 g Fmoc-Phe-OH (2.7 mmol, 3 eq.), 0.38 g HOBt (2.7 mmol, 3 eq.), 0.83 mL DIC (5.4 mmol, 6 eq.) and 9.0 mL DMF to generate a concentration of 0.30 M. The coupling reaction was run for 4 hours and a negative ninhydrin test was used to confirm the reaction was complete. The reaction mixture was then drained to produce Resin-O-Ile-Arg(Pbf)-NH-Fmoc. The Fmoc protecting group was removed following the *Fmoc Removal* procedure and a positive ninhydrin test was used to confirm complete removal, producing Resin-O-Ile-Arg(Pbf)-NH<sub>2</sub>.

## Supporting Information

### Resin-O-Ile-Arg(Pbf)-Ala-NH<sub>2</sub>

The resin-bound tripeptide Resin-O-Ile-Arg(Pbf)-Ala-NH<sub>2</sub> was synthesised following the *Coupling Reaction* procedure using Resin-O-Ile-Arg(Pbf)-NH<sub>2</sub> synthesised from previous coupling reaction, together with 0.84 g Fmoc-Ala-OH (2.7 mmol, 3 eq.), 0.37 g HOAt (2.7 mmol, 3 eq.), 0.83 mL DIC (5.4 mmol, 6 eq.) and 9.0 mL DMF to generate a concentration of 0.30 M. The coupling reaction was run overnight and a negative ninhydrin test was used to confirm the reaction was complete. The reaction mixture was then drained to produce Resin-O-Ile-Arg(Pbf)-Ala-NHFmoc. The Fmoc protecting group was removed following the *Fmoc Removal* procedure and a positive ninhydrin test was used to confirm complete removal, producing Resin-O-Ile-Arg(Pbf)-Ala-NH<sub>2</sub>.

### Resin-O-Ile-Arg(Pbf)-Ala-Tyr(t-Bu)-NH<sub>2</sub>

The resin-bound tetrapeptide Resin-O-Ile-Arg(Pbf)-Ala-Tyr(t-Bu)-NH<sub>2</sub> was synthesised following the *Coupling Reaction* procedure using Resin-O-Ile-Arg(Pbf)-Ala-NH<sub>2</sub> synthesised from previous coupling reaction, together with 1.24 g Fmoc-Tyr(t-Bu)-OH (2.7 mmol, 3 eq.), 0.38 g HOBt (2.7 mmol, 3 eq.), 0.83 mL DIC (5.4 mmol, 6 eq.) and 9.0 mL DMF to generate a concentration of 0.30 M. The coupling reaction was run for 4 hours and a negative ninhydrin test was used to confirm the reaction was complete. The reaction mixture was then drained to produce Resin-O-Ile-Arg(Pbf)-Ala-Tyr(t-Bu)-NHFmoc. The Fmoc protecting group was removed following the *Fmoc Removal* procedure and a positive ninhydrin test was used to confirm complete removal, producing Resin-O-Ile-Arg(Pbf)-Ala-Tyr(t-Bu)-NH<sub>2</sub>.

### Resin-O-Ile-Arg(Pbf)-Ala-Tyr(t-Bu)-Ala-NH<sub>2</sub>

The resin-bound pentapeptide Resin-O-Ile-Arg(Pbf)-Ala-Tyr(t-Bu)-Ala-NH<sub>2</sub> was synthesised following the *Coupling Reaction* procedure using Resin-O-Ile-Arg(Pbf)-Ala-Tyr(t-Bu)-NH<sub>2</sub> synthesised from previous coupling reaction, together with 0.84 g Fmoc-Ala-OH (2.7 mmol, 3 eq.), 0.37 g HOBt (2.7 mmol, 3 eq.), 0.83 mL DIC (5.4 mmol, 6 eq.) and 9.0 mL DMF to generate a concentration of 0.30 M. The coupling reaction was run for 4 hours and a negative ninhydrin test was used to confirm the reaction was complete. The reaction mixture was then drained to produce Resin-O-Ile-Arg(Pbf)-Ala-Tyr(t-Bu)-Ala-NHFmoc. The Fmoc protecting group was removed following the *Fmoc Removal* procedure and a positive ninhydrin test was used to confirm complete removal, producing Resin-O-Ile-Arg(Pbf)-Ala-Tyr(t-Bu)-Ala-NH<sub>2</sub>.

### Resin-O-Ile-Arg(Pbf)-Ala-Tyr(t-Bu)-Ala-Lys(Boc)-NH<sub>2</sub>

The resin-bound pentapeptide Resin-O-Ile-Arg(Pbf)-Ala-Tyr(t-Bu)-Ala-NH<sub>2</sub> was synthesised following the *Coupling Reaction* procedure using Resin-O-Ile-Arg(Pbf)-Ala-Tyr(t-Bu)-Ala-NH<sub>2</sub> synthesised from previous coupling reaction, together with 1.27 g Fmoc-Lys(Boc)-OH (2.7 mmol, 3 eq.), 0.37 g HOBt (2.7 mmol, 3 eq.), 0.83 mL DIC (5.4 mmol, 6 eq.) and 9.0 mL DMF to generate a concentration of 0.30 M. The coupling reaction was run for 4 hours and a negative ninhydrin test was used to confirm the reaction was complete. The reaction mixture was then drained to produce Resin-O-Ile-Arg(Pbf)-Ala-Tyr(t-Bu)-Ala-Lys(Boc)-NHFmoc. The Fmoc protecting group was removed following the *Fmoc Removal* procedure and a positive ninhydrin test was used to confirm complete removal, producing Resin-O-Ile-Arg(Pbf)-Ala-Tyr(t-Bu)-Ala-Lys(Boc)-NH<sub>2</sub>.

### HO-Ile-Arg(Pbf)-Ala-Tyr(t-Bu)-Ala-Lys(Boc)-NH<sub>2</sub>

The linear hexapeptide HO-Ile-Arg(Pbf)-Ala-Tyr(t-Bu)-Ala-Lys(Boc)-NH<sub>2</sub> was generated following the *Cleavage* procedure. The linear peptide was cleaved from the resin using a mixed solution of 6.4 mL of TFE and 6.4 mL of CH<sub>2</sub>Cl<sub>2</sub>. The resin-containing solution was filtered and dried *in vacuo* to yield HO-Ile-Arg(Pbf)-Ala-Tyr(t-Bu)-Ala-Lys(Boc)-NH<sub>2</sub> as a white solid (450 mg, overall 45%).

### HO-Ile-Arg-Ala-Tyr-Ala-Lys-NH<sub>2</sub>

The free linear peptide HO-Ile-Arg-Ala-Tyr-Ala-Lys-NH<sub>2</sub> was generated by removing the side chain protecting groups on HO-Ile-Arg(Pbf)-Ala-Tyr(t-Bu)-Ala-Lys(Boc)-NH<sub>2</sub>. 71 mg HO-Ile-Arg(Pbf)-Ala-Tyr(t-Bu)-Ala-Lys(Boc)-NH<sub>2</sub> (0.063 mmol, 1 eq.) was deprotected using a mixture of 284  $\mu$ L of TFA and anisole (6 eq.). The free linear peptide then underwent HPLC purification to generate pure final compound **6.2 LIN** in a 69% yield as a white solid.

LC/MS (ESI) *m/z*: [M+2H]<sup>2+</sup> calcd for C<sub>33</sub>H<sub>56</sub>N<sub>10</sub>O<sub>8</sub>, 361.22; found, 361.10.

HRMS (ESI-TOF) *m/z*: [M+2H]<sup>2+</sup> calcd for C<sub>33</sub>H<sub>56</sub>N<sub>10</sub>O<sub>8</sub>, 361.2200; found, 361.2216.

<sup>1</sup>H NMR (600 MHz, D<sub>2</sub>O)  $\delta$  7.47-7.25 (m, 2H,  $\delta$ H Tyr), 7.02-6.96 (d, *J* = 8.40 Hz, 2H,  $\epsilon$ H Tyr), 4.56-4.46 (m, 1H,  $\alpha$ H Arg), 4.56-4.46 (m, 1H,  $\alpha$ H Ala), 4.56-4.46 (m, 1H,  $\alpha$ H Ala), 4.29-4.25 (d, *J* = 6.19 Hz, 1H,  $\beta$ H Ile), 4.16-4.11 (m, 1H,  $\alpha$ H Lys), 3.41-3.34 (t, *J* = 5.52 Hz, 2H,  $\delta$ CH<sub>2</sub> Arg), 3.23-3.06 (m, 2H,  $\epsilon$ CH<sub>2</sub> Lys), 3.23-3.06 (m, 2H,  $\beta$ CH<sub>2</sub> Tyr), 2.07-1.95 (m, 1H,  $\beta$ H Ile), 2.07-1.95 (m, 1H,  $\beta$ CH<sub>2</sub> Lys), 2.07-1.95 & 1.97-1.75 (m, 1H,  $\beta$ CH<sub>2</sub> Arg), 1.95-1.75 (m, 2H,  $\gamma$ CH<sub>2</sub> Arg), 1.95-1.75 (m, 2H,  $\delta$ CH<sub>2</sub> Lys), 1.63-1.45 (m, 2H,  $\gamma$ CH<sub>2</sub> Lys), 1.63-1.45 (m, 3H,  $\beta$ CH<sub>3</sub> Ala), 1.63-1.45 (m, 3H,  $\beta$ CH<sub>3</sub> Ala), 1.63-1.45 & 1.35-1.25 (m, 2H,  $\gamma$ CH<sub>2</sub> Ile), 1.06-1.00 (m, 3H,  $\delta$ CH<sub>3</sub> Ile), 1.06-1.00 (m, 3H,  $\gamma$ CH<sub>3</sub> Ile).



## Experimental Procedures for 6.2 CYC

**cyclo-Ile-Arg(Pbf)-Ala-Tyr(t-Bu)-Ala-Lys(Boc)**

*cyclo-Ile-Arg(Pbf)-Ala-Tyr(t-Bu)-Ala-Lys(Boc)* was synthesised using 0.12 g HO-Ile-Arg(Pbf)-Ala-Tyr(t-Bu)-Ala-Lys(Boc)-NH<sub>2</sub> (0.11 mmol, 1 eq.), 0.042 g HATU (0.11 mmol, 1 eq.), 0.020 g TBTU (0.050 mmol, 0.5 eq.), 0.012 g DMTMM (0.050 mmol, 0.5 eq.), 0.15 mL DIPEA (0.88 mmol, 8 eq.) in anhydrous CH<sub>2</sub>Cl<sub>2</sub> (106 mL, 0.001 M) following the *General Procedure for Synthesis of Cyclic Peptides*. The reaction was allowed to stir overnight and the reaction was monitored *via* LC/MS. Once complete, the reaction mixture was subjected to an acid-base work-up before drying over Na<sub>2</sub>SO<sub>4</sub>, filtering, evaporating under reduced pressure and drying *in vacuo* to yield crude *cyclo-Ile-Arg(Pbf)-Ala-Tyr(t-Bu)-Ala-Lys(Boc)*.

**cyclo-Ile-Arg-Ala-Tyr-Ala-Lys**

The free cyclic peptide *cyclo-Ile-Arg-Ala-Tyr-Ala-Lys* was generated by removing the side chain protecting groups on *cyclo-Ile-Arg(Pbf)-Ala-Tyr(t-Bu)-Ala-Lys(Boc)*. 45 mg *cyclo-Ile-Arg(Pbf)-Ala-Tyr(t-Bu)-Ala-Lys(Boc)* (0.040 mmol, 1 eq.) was deprotected using a mixture of 180  $\mu$ L of TFA and anisole (6 eq.). The free cyclic peptide then underwent HPLC purification to generate pure final compound **6.2 CYC** in a 26% yield as a white solid.

LC/MS (ESI) *m/z*: [M-H]<sup>-</sup> calcd for C<sub>33</sub>H<sub>54</sub>N<sub>10</sub>O<sub>7</sub>, 701.42; found, 700.90.

HRMS (ESI-TOF) *m/z*: [M+2H]<sup>2+</sup> calcd for C<sub>33</sub>H<sub>54</sub>N<sub>10</sub>O<sub>7</sub>, 352.2100; found 352.2162.

<sup>1</sup>H NMR (600 MHz, D<sub>2</sub>O)  $\delta$  7.35-7.12 (m, 2H,  $\delta$ H Tyr), 6.95-6.83 (dd, *J* = 7.68, 24.31 Hz, 2H,  $\epsilon$ H Tyr), 4.62-4.49 (m, 1H,  $\alpha$ H Tyr), 4.49-4.16 (m, 1H,  $\alpha$ H Arg), 4.49-4.16 (m, 1H,  $\alpha$ H Ala), 4.49-4.16 (m, 1H,  $\alpha$ H Ala), 4.16-4.13 (d, *J* = 6.18 Hz, 1H,  $\beta$ H Ile), 4.13-4.06 (m, 1H,  $\alpha$ H Lys), 3.34-3.22 (m, 2H,  $\delta$ CH<sub>2</sub> Arg), 3.22-2.83 (m, 2H,  $\epsilon$ CH<sub>2</sub> Lys), 3.22-2.83 (m, 2H,  $\beta$ CH<sub>2</sub> Tyr), 1.97-1.95 (m, 1H,  $\beta$ H Ile), 1.97-1.78 (m, 1H,  $\beta$ CH<sub>2</sub> Lys), 1.78-1.58 (m, 1H,  $\beta$ CH<sub>2</sub> Arg), 1.78-1.58 (m, 2H,  $\gamma$ CH<sub>2</sub> Arg), 1.78-1.58 (m, 2H,  $\delta$ CH<sub>2</sub> Lys), 1.58-1.47 & 1.27-1.12 (m, 2H,  $\gamma$ CH<sub>2</sub> Ile), 1.47-1.27 (m, 2H,  $\gamma$ CH<sub>2</sub> Lys), 1.47-1.27 (m, 3H,  $\beta$ CH<sub>3</sub> Ala), 1.47-1.27 (m, 3H,  $\beta$ CH<sub>3</sub> Ala), 1.01-0.84 (m, 3H,  $\delta$ CH<sub>3</sub> Ile), 1.01-0.84 (m, 3H,  $\gamma$ CH<sub>3</sub> Ile).

## Synthesis of 7.2 LIN and 7.2 CYC

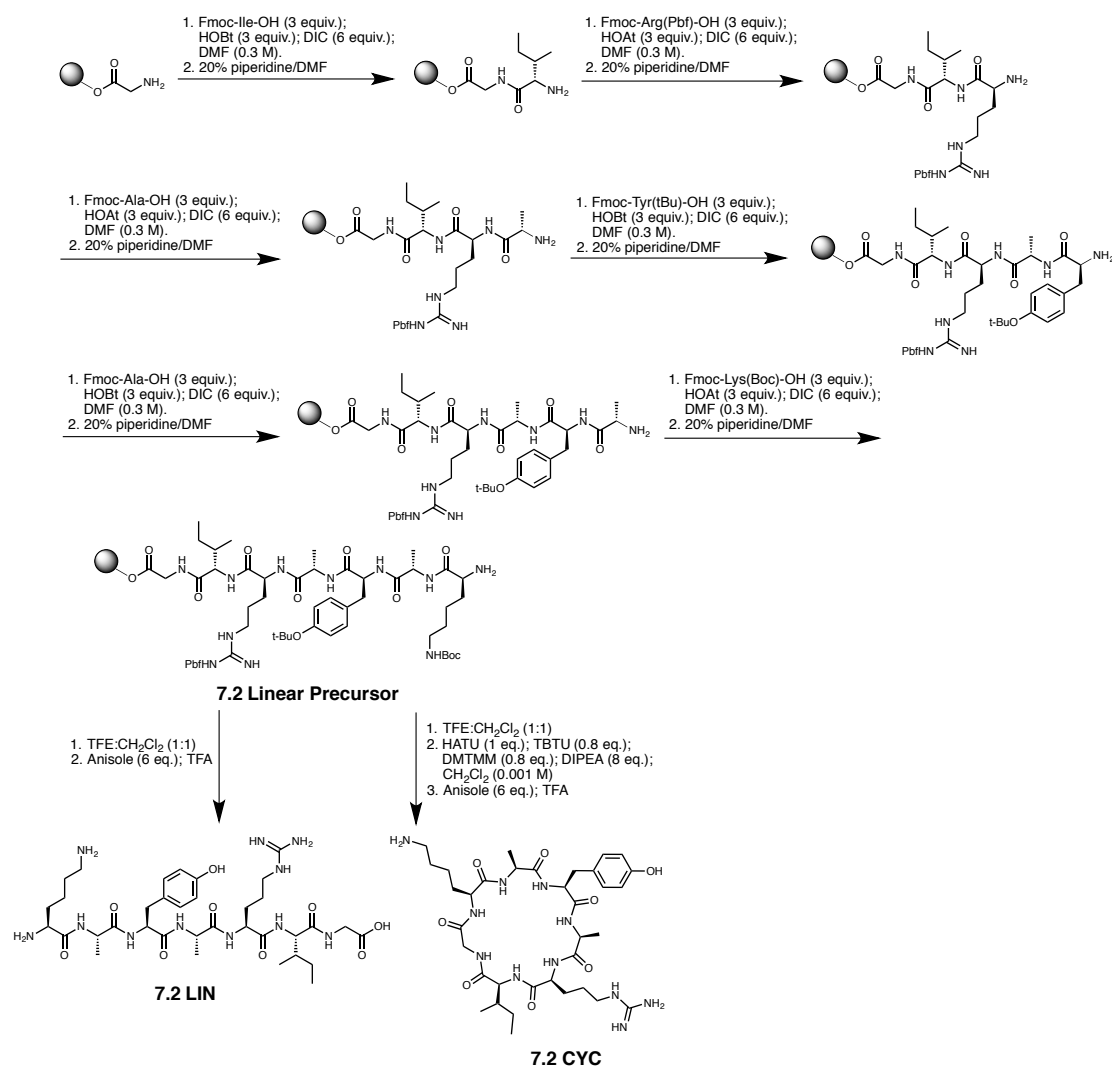

## Supporting Information

### Experimental Procedures for 7.2 LIN

#### Resin-O-Gly-Ile-NHFmoc

The dipeptide Resin-O-Gly-Ile-NHFmoc was synthesized following the "Solid phase peptide synthesis" procedure utilizing 1.012 g (0.90 mmol, 1.0 equivalent) of Resin-O-Gly-NH<sub>2</sub>, 0.954 g (2.70 mmol, 3.0 equivalents) of HO-Ile-NHFmoc, 365 mg of HOBt (2.70 mmol, 3.0 equivalents), 0.85 mL of DIC (5.40 mmol, 6.0 equivalents) and 4.5 mL of DMF (0.2 M). The reaction was run for 2 hr and a negative ninhydrin test was performed to verify the reaction completion. The reaction mixture was drained to give the Fmoc-protected resin-bound dipeptide.

#### Resin-O-Gly-Ile-NH<sub>2</sub>

The dipeptide Resin-O-Gly-Ile-NH<sub>2</sub> was synthesized following the "Fmoc removal" procedure. A positive ninhydrin test was performed to verify the completion of Fmoc removal.

#### Resin-O-Gly-Ile-Arg(Pbf)-NHFmoc

The tripeptide Resin-O-Gly-Ile-Arg(Pbf)-NHFmoc was synthesized following the "Solid phase peptide synthesis" procedure utilizing 1.012 g (0.90 mmol, 1.0 equivalent) of Resin-O-Gly-Ile-NH<sub>2</sub>, 1.150 g (2.70 mmol, 3.0 equivalents) of HO-Arg(Pbf)-NHFmoc, 367 mg of HOAt (2.70 mmol, 3.0 equivalents), 0.85 mL of DIC (5.40 mmol, 6.0 equivalents) and 4.5 mL of DMF (0.2 M). The reaction was run for 2 hr and a negative ninhydrin test was performed to verify the reaction completion. The reaction mixture was drained to give the Fmoc-protected resin-bound tripeptide.

#### Resin-O-Gly-Ile-Arg(Pbf)-NH<sub>2</sub>

The tripeptide Resin-O-Gly-Ile-Arg(Pbf)-NH<sub>2</sub> was synthesized following the "Fmoc removal" procedure. A positive ninhydrin test was performed to verify the completion of Fmoc removal.

#### Resin-O-Gly-Ile-Arg(Pbf)-Ala-NHFmoc

The tetrapeptide Resin-O-Gly-Ile-Arg(Pbf)-Ala-NHFmoc was synthesized following the "Solid phase peptide synthesis" procedure utilizing 1.012 g (0.90 mmol, 1.0 equivalent) of Resin-O-Gly-Ile-Arg(Pbf)-NH<sub>2</sub>, 0.841 g (2.70 mmol, 3.0 equivalents) of HO-Ala-NHFmoc, 367 mg of HOAt (2.70 mmol, 3.0 equivalents), 0.85 mL of DIC (5.40 mmol, 6.0 equivalents) and 4.5 mL of DMF (0.2 M). The reaction was run for 2 hr and a negative ninhydrin test was performed to verify the reaction completion. The reaction mixture was drained to give the Fmoc-protected resin-bound tetrapeptide.

#### Resin-O-Gly-Ile-Arg(Pbf)-Ala-NH<sub>2</sub>

The tetrapeptide Resin-O-Gly-Ile-Arg(Pbf)-Ala-NH<sub>2</sub> was synthesized following the "Fmoc removal" procedure. A positive ninhydrin test was performed to verify the completion of Fmoc removal.

#### Resin-O-Gly-Ile-Arg(Pbf)-Ala-Tyr(tBu)-NHFmoc

The pentapeptide Resin-O-Gly-Ile-Arg(Pbf)-Ala-Tyr(tBu)-NHFmoc was synthesized following the "Solid phase peptide synthesis" procedure utilizing 1.012 g (0.90 mmol, 1.0 equivalent) of Resin-O-Gly-Ile-Arg(Pbf)-Ala-NH<sub>2</sub>, 1.240 g (2.70 mmol, 3.0 equivalents) of HO-Tyr(tBu)-NHFmoc, 365 mg of HOBt (2.70 mmol, 3.0 equivalents), 0.85 mL of DIC (5.40 mmol, 6.0 equivalents) and 4.5 mL of DMF (0.2 M). The reaction was run for 2 hr and a negative ninhydrin test was performed to verify the reaction completion. The reaction mixture was drained to give the Fmoc-protected resin-bound pentapeptide.

#### Resin-O-Gly-Ile-Arg(Pbf)-Ala-Tyr(tBu)-NH<sub>2</sub>

The pentapeptide Resin-O-Gly-Ile-Arg(Pbf)-Ala-Tyr(tBu)-NH<sub>2</sub> was synthesized following the "Fmoc removal" procedure. A positive ninhydrin test was performed to verify the completion of Fmoc removal.

#### Resin-O-Gly-Ile-Arg(Pbf)-Ala-Tyr(tBu)-Ala-NHFmoc

The hexapeptide Resin-O-Gly-Ile-Arg(Pbf)-Ala-Tyr(tBu)-Ala-NHFmoc was synthesized following the "Solid phase peptide synthesis" procedure utilizing 1.012 g (0.90 mmol, 1.0 equivalent) of Resin-O-Gly-Ile-Arg(Pbf)-Ala-Tyr(tBu)-NH<sub>2</sub>, 0.841 g (2.70 mmol, 3.0 equivalents) of HO-Ala-NHFmoc, 365 mg of HOBt (2.70 mmol, 3.0 equivalents), 0.85 mL of DIC (5.40 mmol, 6.0 equivalents) and 4.5 mL of DMF (0.2 M). The reaction was run for 2 hr and a negative ninhydrin test was performed to verify the reaction completion. The reaction mixture was drained to give the Fmoc-protected resin-bound hexapeptide.

#### Resin-O-Gly-Ile-Arg(Pbf)-Ala-Tyr(tBu)-Ala-NH<sub>2</sub>

The hexapeptide Resin-O-Gly-Ile-Arg(Pbf)-Ala-Tyr(tBu)-Ala-NH<sub>2</sub> was synthesized following the "Fmoc removal" procedure. A positive ninhydrin test was performed to verify the completion of Fmoc removal.

#### Resin-O-Gly-Ile-Arg(Pbf)-Ala-Tyr(tBu)-Ala-Lys(Boc)-NHFmoc

## Supporting Information

The heptapeptide Resin-O-Gly-Ile-Arg(Pbf)-Ala-Tyr(tBu)-Ala-Lys(Boc)-NHfmoc was synthesized following the “Solid phase peptide synthesis” procedure utilizing 1.012 g (0.90 mmol, 1.0 equivalent) of Resin-O-Gly-Ile-Arg(Pbf)-Ala-Tyr(tBu)-Ala-NH<sub>2</sub>, 1.265 g (2.70 mmol, 3.0 equivalents) of HO-Lys(Boc)-NHfmoc, 367 mg of HOAt (2.70 mmol, 3.0 equivalents), 0.85 mL of DIC (5.40 mmol, 6.0 equivalents) and 4.5 mL of DMF (0.2 M). The reaction was run for 2 hr and a negative ninhydrin test was performed to verify the reaction completion. The reaction mixture was drained to give the Fmoc-protected resin-bound heptapeptide.

### Resin-O-Gly-Ile-Arg(Pbf)-Ala-Tyr(tBu)-Ala-Lys(Boc)-NH<sub>2</sub>

The heptapeptide Resin-O-Gly-Ile-Arg(Pbf)-Ala-Tyr(tBu)-Ala-Lys(Boc)-NH<sub>2</sub> was synthesized following the “Fmoc removal” procedure. A positive ninhydrin test was performed to verify the completion of Fmoc removal.

### HO-Gly-Ile-Arg(Pbf)-Ala-Tyr(tBu)-Ala-Lys(Boc)-NH<sub>2</sub>

The double deprotected linear precursor (DDL P) HO-Gly-Ile-Arg(Pbf)-Ala-Tyr(tBu)-Ala-Lys(Boc)-NH<sub>2</sub> was synthesized using the resin-bound peptide prepared from previous step following “Linear peptide cleavage from resin” procedure utilizing 5.0 mL of TFE and 5.0 mL of CH<sub>2</sub>Cl<sub>2</sub>. The resulting slurry was filtered and dried *in vacuo* to yield HO-Gly-Ile-Arg(Pbf)-Ala-Tyr(tBu)-Ala-Lys(Boc)-NH<sub>2</sub> as a pale yellow solid (172 mg, overall 16%).

LC/MS (ESI): *m/z* calculated C<sub>57</sub>H<sub>92</sub>N<sub>11</sub>O<sub>14</sub>S [M + H<sup>+</sup>] = 1186.65, found 1186.15

### HO-Gly-Ile-Arg-Ala-Tyr-Ala-Lys-NH<sub>2</sub>

The HO-Gly-Ile-Arg-Ala-Tyr-Ala-Lys-NH<sub>2</sub> was synthesized utilizing 12.0 mg (0.010 mmol, 1.0 equivalent) of the DDL P HO-Gly-Ile-Arg(Pbf)-Ala-Tyr(tBu)-Ala-Lys(Boc)-NH<sub>2</sub>, 2.00 mL (0.020 mmol, 2.0 equivalents) of Anisole, 0.050 mL of TFA and 0.050 mL of CH<sub>2</sub>Cl<sub>2</sub>. The resulting slurry was dried *in vacuo*. The residue was redissolved in MeOH, and the solution was centrifuged. The supernatant was injected into the HPLC to yield HO-Gly-Ile-Arg-Ala-Tyr-Ala-Lys-NH<sub>2</sub> (4.1 mg, overall 52%).

LC/MS (ESI): *m/z* calculated C<sub>35</sub>H<sub>60</sub>N<sub>11</sub>O<sub>9</sub> [M + H<sup>+</sup>] = 778.46, found 778.05.

HRMS (ESI-TOF): M+H<sup>+</sup>, found 778.4564 C<sub>35</sub>H<sub>61</sub>N<sub>11</sub>O<sub>9</sub> requires 778.4575

<sup>1</sup>H NMR (600 MHz, CDCl<sub>3</sub>, 298K): δ = 0.76-0.81 (t, *J* = 7.37 Hz, 3H, CH<sub>3</sub>δ Ile); 0.84-0.87 (d, *J* = 6.72 Hz, 3H, CH<sub>3</sub>γ Ile); 1.10-1.16 & 1.40-1.46 (m, 2H, CH<sub>2</sub>γ Ile); 1.23-1.25 (d, *J* = 7.11 Hz, 3H, CH<sub>3</sub>β Ala); 1.25-1.29 (d, *J* = 7.24 Hz, 3H, CH<sub>3</sub>β Ala); 1.26-1.34 (m, 2H, CH<sub>2</sub>γ Lys); 1.47-1.60 (m, 2H, CH<sub>2</sub>δ Lys); 1.57-1.65 (m, 2H, CH<sub>2</sub>γ Arg); 1.65-1.77 (m, 2H, CH<sub>2</sub>β Lys); 1.74-1.80 (m, 2H, CH<sub>2</sub>β Arg); 1.77-1.83 (m, 2H, CHβ Ile); 2.84-2.90 & 2.92-2.96 (m, 2H, CH<sub>2</sub>β Tyr); 2.86-2.92 (m, 2H, CH<sub>2</sub>δ Arg); 3.10-3.16 (m, 2H, CH<sub>2</sub>ε Lys); 3.81-3.85 & 3.90-3.94 & 3.92-3.96 & 3.97-4.00 (m, 2H, CH<sub>2</sub> Gly); 3.86-3.91 (m, 2H, CHα Arg); 4.12-4.17 (m, 1H, CHα Ile); 4.19-4.25 (m, 1H, CHα Ala); 4.19-4.25 (m, 1H, CHα Lys); 4.27-4.33 (m, 1H, CHα Ala); 4.41-4.46 (m, 1H, CHα Tyr); 6.72-6.76 & 7.13-7.16 (d, *J* = 8.42 Hz, 2H, Ph Tyr); 7.04-7.09 & 7.19-7.22 (d, *J* = 8.42 Hz, 2H, Ph Tyr).

<sup>13</sup>C NMR (150 MHz, CDCl<sub>3</sub>, 298K): δ = 9.96, 14.58, 16.63, 17.69, 21.06, 24.35, 24.41, 26.25, 28.05, 30.31, 36.11, 36.28, 38.96, 40.37, 40.52, 41.03, 44.53, 49.19, 49.29, 52.66, 53.23, 55.04, 58.08, 115.36, 117.30, 128.01, 130.55, 154.37, 156.69, 162.87, 169.05, 172.44, 173.02, 173.21, 173.69, 173.99, 174.08.

## Experimental Procedures for 7.2 CYC

### cyclo-Gly-Ile-Arg(Pbf)-Ala-Tyr(tBu)-Ala-Lys(Boc)

The macrocycle Gly-Ile-Arg(Pbf)-Ala-Tyr(tBu)-Ala-Lys(Boc) was synthesized following the “Syringe pump macrocyclization” procedure utilizing 67 mg (0.056 mmol, 1.0 equivalent) of DDL P HO-Gly-Ile-Arg(Pbf)-Ala-Tyr(tBu)-Ala-Lys(Boc)-NH<sub>2</sub>, 0.058 mL (0.336 mmol, 6.0 equivalents) of DIPEA, 9.00 mg (0.028 mmol, 0.5 equivalents) of TBTU, 21.3 mg (0.056 mmol, 1.0 equivalents) HATU, and 7.75 mg (0.028 mmol, 0.5 equivalents) of DMTMM in 56 mL CH<sub>2</sub>Cl<sub>2</sub>. The crude reaction was dried *in vacuo* to yield 25.4 mg of macrocycle. The macrocycle was taken onto the next reaction without further purification.

### cyclo-Gly-Ile-Arg-Ala-Tyr-Ala-Lys

Macrocycle Gly-Ile-Arg-Ala-Tyr-Ala-Lys was synthesized utilizing 25.4 mg (0.022 mmol, 1.0 equivalent) of the Macrocycle Gly-Ile-Arg(Pbf)-Ala-Tyr(tBu)-Ala-Lys(Boc), 4.70 mL (0.044 mmol, 2.0 equivalents) of Anisole, 0.11 mL of TFA and 0.11 mL of CH<sub>2</sub>Cl<sub>2</sub>. The resulting slurry was dried *in vacuo*. The residue was redissolved in MeOH, and the solution was centrifuged. The supernatant was injected into the HPLC to yield Macrocycle Gly-Ile-Arg-Ala-Tyr-Ala-Lys (3.2 mg, overall 19%). LCMS: *m/z* calcd for C<sub>35</sub>H<sub>58</sub>N<sub>11</sub>O<sub>8</sub> (M + H<sup>+</sup>) = 760.45, found 760.30.

HRMS (ESI-TOF): M+H<sup>+</sup>, found 760.4462 C<sub>35</sub>H<sub>59</sub>N<sub>11</sub>O<sub>8</sub> requires 760.4470

<sup>1</sup>H NMR (600 MHz, CDCl<sub>3</sub>, 308K): δ = 0.90-0.96 (m, 3H, CH<sub>3</sub>δ Ile); 0.94-1.01 (m, 3H, CH<sub>3</sub>γ Ile); 1.24-1.29 & 1.52-1.56 (m, 2H, CH<sub>2</sub>γ Ile); 1.32-1.48 (m, 6H, CH<sub>3</sub>β Ala); 1.41-1.51 (m, 2H, CH<sub>2</sub>γ Lys); 1.57-1.72 (m, 2H, CH<sub>2</sub>δ Lys); 1.69-1.79 (m, 2H, CH<sub>2</sub>γ Arg); 1.79-1.84 & 1.85-1.98 (m, 2H, CH<sub>2</sub>β Lys); 1.71-1.76 & 1.85-1.90 (m, 2H, CH<sub>2</sub>β Arg); 1.90-1.97 (m, 2H, CHβ Ile); 3.01-3.08 (m, 2H, CH<sub>2</sub>β Tyr); 3.22-3.30 (m, 2H, CH<sub>2</sub>δ Arg); 3.46-3.50 & 3.52-3.58 (m, 2H, CH<sub>2</sub>ε Lys); 3.99-4.09 & 4.12-4.23 (m, 2H, CH<sub>2</sub> Gly); 3.93-3.95 & 4.00-4.03 (m, 2H, CHα Arg); 4.12-4.18 & 4.25-4.28 (m, 1H, CHα Ala); 4.20-4.28 (m, 1H, CHα Ile); 4.31-4.39 (m, 1H, CHα Ala); 4.31-4.34 & 4.35-4.44 (m, 1H, CHα Lys); 4.43-4.45 & 4.50-4.60 (m, 1H, CHα Tyr); 6.83-6.93 (m, 2H, Ph Tyr); 7.10-7.20 (m, 2H, Ph Tyr).

## Supporting Information

$^{13}\text{C}$  NMR (150 MHz,  $\text{CDCl}_3$ , 308K):  $\delta$  = 10.11, 14.68, 16.24, 16.67, 21.94, 24.71, 24.51, 25.02, 26.27, 28.03, 30.72, 36.14, 39.10, 40.50, 41.00, 42.40, 43.80, 46.10, 49.50, 50.80, 52.10, 53.20, 54.10, 55.00, 55.30, 55.40, 58.40, 115.43, 130.66, 154.37, 156.69, 162.87, 169.05, 172.44, 173.02, 173.21, 173.69, 173.99, 174.08.

### Synthesis of 8.2 LIN and 8.2 CYC

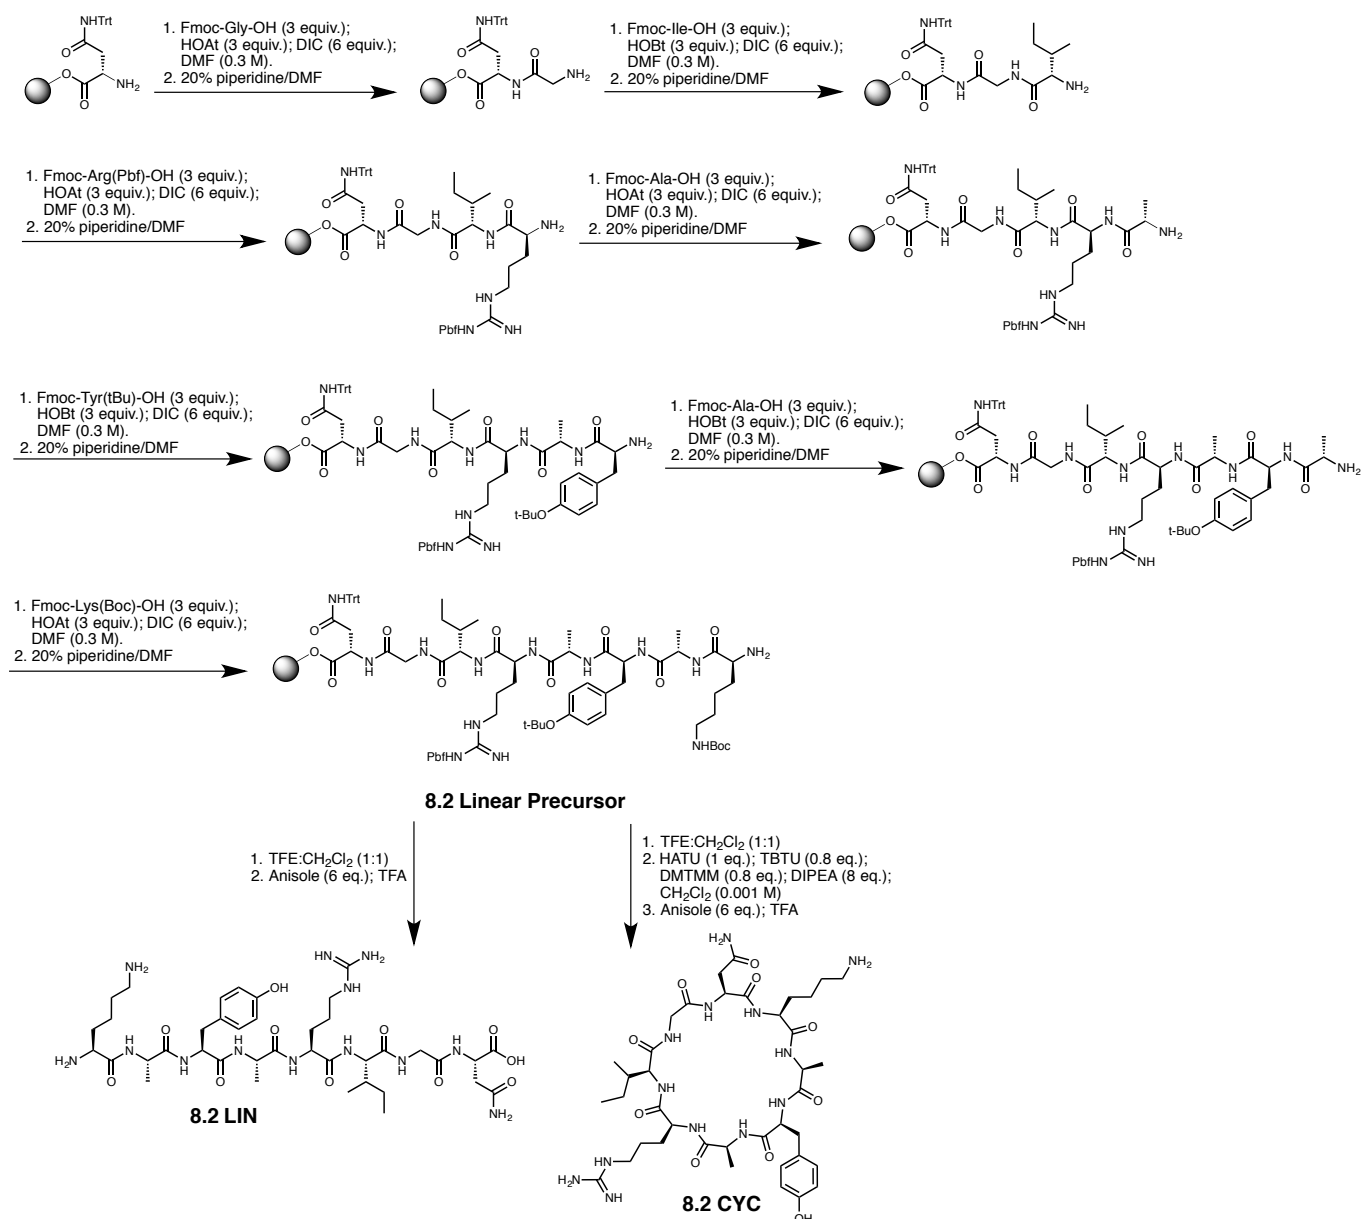

### Experimental Procedures for 8.2 LIN

#### Resin-O-Asn(Trt)-Gly-NHFmoc

The dipeptide Resin-O-Asn(Trt)-Gly-NHFmoc was synthesized following the “Solid phase peptide synthesis” procedure utilizing 0.984 g (0.66 mmol, 1.0 equivalent) of Resin-O-Asn(Trt)- $\text{NH}_2$ , 0.589 g (1.98 mmol, 3.0 equivalents) of HO-Gly-NHFmoc, 268 mg of HOBT (1.98 mmol, 3.0 equivalents), 0.62 mL of DIC (3.96 mmol, 6.0 equivalents) and 3.3 mL of DMF (0.2 M). The reaction was run for 2 hr and a negative ninhydrin test was performed to verify the reaction completion. The reaction mixture was drained to give the Fmoc-protected resin-bound dipeptide.

#### Resin-O-Asn(Trt)-Gly- $\text{NH}_2$

The dipeptide Resin-O-Asn(Trt)-Gly- $\text{NH}_2$  was synthesized following the “Fmoc removal” procedure. A positive ninhydrin test was performed to verify the completion of Fmoc removal.

#### Resin-O-Asn(Trt)-Gly-Ile-NHFmoc

## Supporting Information

The tripeptide Resin-O-Asn(Trt)-Gly-Ile-NHFmoc was synthesized following the "Solid phase peptide synthesis" procedure utilizing 0.984 g (0.66 mmol, 1.0 equivalent) of Resin-O-Asn(Trt)-Gly-NH<sub>2</sub>, 0.70 g (1.98 mmol, 3.0 equivalents) of HO-Ile-NHFmoc, 268 mg of HOBt (1.98 mmol, 3.0 equivalents), 0.62 mL of DIC (3.96 mmol, 6.0 equivalents) and 3.3 mL of DMF (0.2 M). The reaction was run for 2 hr and a negative ninhydrin test was performed to verify the reaction completion. The reaction mixture was drained to give the Fmoc-protected resin-bound tripeptide.

### **Resin-O-Asn(Trt)-Gly-Ile-NH<sub>2</sub>**

The tripeptide Resin-O-Asn(Trt)-Gly-Ile-NH<sub>2</sub> was synthesized following the "Fmoc removal" procedure. A positive ninhydrin test was performed to verify the completion of Fmoc removal.

### **Resin-O-Asn(Trt)-Gly-Ile-Arg(Pbf)-NHFmoc**

The tetrapeptide Resin-O-Asn(Trt)-Gly-Ile-Arg(Pbf)-NHFmoc was synthesized following the "Solid phase peptide synthesis" procedure utilizing 0.984 g (0.66 mmol, 1.0 equivalent) of Resin-O-Asn(Trt)-Gly-Ile-NH<sub>2</sub>, 0.845 g (1.98 mmol, 3.0 equivalents) of HO-Arg(Pbf)-NHFmoc, 269 mg of HOAt (1.98 mmol, 3.0 equivalents), 0.62 mL of DIC (3.96 mmol, 6.0 equivalents) and 3.3 mL of DMF (0.2 M). The reaction was run for 2 hr and a negative ninhydrin test was performed to verify the reaction completion. The reaction mixture was drained to give the Fmoc-protected resin-bound tetrapeptide.

### **Resin-O-Asn(Trt)-Gly-Ile-Arg(Pbf)-NH<sub>2</sub>**

The tetrapeptide Resin-O-Asn(Trt)-Gly-Ile-Arg(Pbf)-NH<sub>2</sub> was synthesized following the "Fmoc removal" procedure. A positive ninhydrin test was performed to verify the completion of Fmoc removal.

### **Resin-O-Asn(Trt)-Gly-Ile-Arg(Pbf)-Ala-NHFmoc**

The pentapeptide Resin-O-Asn(Trt)-Gly-Ile-Arg(Pbf)-Ala-NHFmoc was synthesized following the "Solid phase peptide synthesis" procedure utilizing 0.984 g (0.66 mmol, 1.0 equivalent) of Resin-O-Asn(Trt)-Gly-Ile-Arg(Pbf)-NH<sub>2</sub>, 0.616 g (1.98 mmol, 3.0 equivalents) of HO-Ala-NHFmoc, 269 mg of HOAt (1.98 mmol, 3.0 equivalents), 0.62 mL of DIC (3.96 mmol, 6.0 equivalents) and 3.3 mL of DMF (0.2 M). The reaction was run for 2 hr and a negative ninhydrin test was performed to verify the reaction completion. The reaction mixture was drained to give the Fmoc-protected resin-bound pentapeptide.

### **Resin-O-Asn(Trt)-Gly-Ile-Arg(Pbf)-Ala-NH<sub>2</sub>**

The pentapeptide Resin-O-Asn(Trt)-Gly-Ile-Arg(Pbf)-Ala-NH<sub>2</sub> was synthesized following the "Fmoc removal" procedure. A positive ninhydrin test was performed to verify the completion of Fmoc removal.

### **Resin-O-Asn(Trt)-Gly-Ile-Arg(Pbf)-Ala-Tyr(tBu)-NHFmoc**

The hexapeptide Resin-O-Asn(Trt)-Gly-Ile-Arg(Pbf)-Ala-Tyr(tBu)-NHFmoc was synthesized following the "Solid phase peptide synthesis" procedure utilizing 0.984 g (0.66 mmol, 1.0 equivalent) of Resin-O-Asn(Trt)-Gly-Ile-Arg(Pbf)-Ala-NH<sub>2</sub>, 0.910 g (1.98 mmol, 3.0 equivalents) of HO-Tyr(tBu)-NHFmoc, 268 mg of HOBt (1.98 mmol, 3.0 equivalents), 0.62 mL of DIC (3.96 mmol, 6.0 equivalents) and 3.3 mL of DMF (0.2 M). The reaction was run for 2 hr and a negative ninhydrin test was performed to verify the reaction completion. The reaction mixture was drained to give the Fmoc-protected resin-bound hexapeptide.

### **Resin-O-Asn(Trt)-Gly-Ile-Arg(Pbf)-Ala-Tyr(tBu)-NH<sub>2</sub>**

The hexapeptide Resin-O-Asn(Trt)-Gly-Ile-Arg(Pbf)-Ala-Tyr(tBu)-NH<sub>2</sub> was synthesized following the "Fmoc removal" procedure. A positive ninhydrin test was performed to verify the completion of Fmoc removal.

### **Resin-O-Asn(Trt)-Gly-Ile-Arg(Pbf)-Ala-Tyr(tBu)-Ala-NHFmoc**

The heptapeptide Resin-O-Asn(Trt)-Gly-Ile-Arg(Pbf)-Ala-Tyr(tBu)-Ala-NHFmoc was synthesized following the "Solid phase peptide synthesis" procedure utilizing 0.984 g (0.66 mmol, 1.0 equivalent) of Resin-O-Asn(Trt)-Gly-Ile-Arg(Pbf)-Ala-Tyr(tBu)-NH<sub>2</sub>, 0.616 g (1.98 mmol, 3.0 equivalents) of HO-Ala-NHFmoc, 268 mg of HOBt (1.98 mmol, 3.0 equivalents), 0.62 mL of DIC (3.96 mmol, 6.0 equivalents) and 3.3 mL of DMF (0.2 M). The reaction was run for 2 hr and a negative ninhydrin test was performed to verify the reaction completion. The reaction mixture was drained to give the Fmoc-protected resin-bound heptapeptide.

### **Resin-O-Asn(Trt)-Gly-Ile-Arg(Pbf)-Ala-Tyr(tBu)-Ala-NH<sub>2</sub>**

The heptapeptide Resin-O-Asn(Trt)-Gly-Ile-Arg(Pbf)-Ala-Tyr(tBu)-Ala-NH<sub>2</sub> was synthesized following the "Fmoc removal" procedure. A positive ninhydrin test was performed to verify the completion of Fmoc removal.

### **Resin-O-Asn(Trt)-Gly-Ile-Arg(Pbf)-Ala-Tyr(tBu)-Ala-Lys(Boc)-NHFmoc**

The octapeptide Resin-O-Asn(Trt)-Gly-Ile-Arg(Pbf)-Ala-Tyr(tBu)-Ala-Lys(Boc)-NHFmoc was synthesized following the "Solid phase peptide synthesis" procedure utilizing 0.984 g (0.66 mmol, 1.0 equivalent) of Resin-O-Asn(Trt)-Gly-Ile-Arg(Pbf)-Ala-Tyr(tBu)-Ala-NH<sub>2</sub>, 0.928 g (1.98 mmol, 3.0 equivalents) of HO-Lys(Boc)-NHFmoc, 269 mg of

## Supporting Information

HOAt (1.98 mmol, 3.0 equivalents), 0.62 mL of DIC (3.96 mmol, 6.0 equivalents) and 3.3 mL of DMF (0.2 M). The reaction was run for 2 hr and a negative ninhydrin test was performed to verify the reaction completion. The reaction mixture was drained to give the Fmoc-protected resin-bound octapeptide.

### Resin-O-Asn(Trt)-Gly-Ile-Arg(Pbf)-Ala-Tyr(tBu)-Ala-Lys(Boc)-NH<sub>2</sub>

The octapeptide Resin-O-Asn(Trt)-Gly-Ile-Arg(Pbf)-Ala-Tyr(tBu)-Ala-Lys(Boc)-NH<sub>2</sub> was synthesized following the "Fmoc removal" procedure. A positive ninhydrin test was performed to verify the completion of Fmoc removal.

HO-Asn(Trt)-Gly-Ile-Arg(Pbf)-Ala-Tyr(tBu)-Ala-Lys(Boc)-NH<sub>2</sub>

The double deprotected linear precursor (DDL P) HO-Asn(Trt)-Gly-Ile-Arg(Pbf)-Ala-Tyr(tBu)-Ala-Lys(Boc)-NH<sub>2</sub> was synthesized using the resin-bound peptide prepared from previous step following "Linear peptide cleavage from resin" procedure utilizing 6.5 mL of TFE and 6.5 mL of CH<sub>2</sub>Cl<sub>2</sub>. The resulting slurry was filtered and dried *in vacuo* to yield HO-Asn(Trt)-Gly-Ile-Arg(Pbf)-Ala-Tyr(tBu)-Ala-Lys(Boc)-NH<sub>2</sub> as a pale yellow solid (691 mg, overall 68%). LC/MS (ESI): *m/z* calculated C<sub>80</sub>H<sub>112</sub>N<sub>13</sub>O<sub>16</sub>S [M + H<sup>+</sup>] = 1542.81, found 1542.25

### HO-Asn-Gly-Ile-Arg-Ala-Tyr-Ala-Lys-NH<sub>2</sub>

The HO-Asn-Gly-Ile-Arg-Ala-Tyr-Ala-Lys-NH<sub>2</sub> was synthesized utilizing 43.7 mg (0.028 mmol, 1.0 equivalent) of the DDL P HO-Asn(Trt)-Gly-Ile-Arg(Pbf)-Ala-Tyr(tBu)-Ala-Lys(Boc)-NH<sub>2</sub>, 6.00 mL (0.056 mmol, 2.0 equivalents) of Anisole, 0.140 mL of TFA and 0.140 mL of CH<sub>2</sub>Cl<sub>2</sub>. The resulting slurry was dried *in vacuo*. The residue was redissolved in MeOH, and the solution was centrifuged. The supernatant was injected into the HPLC to yield HO-Asn-Gly-Ile-Arg-Ala-Tyr-Ala-Lys-NH<sub>2</sub> (15.9 mg, overall 63%).

LC/MS (ESI): *m/z* calculated C<sub>39</sub>H<sub>66</sub>N<sub>13</sub>O<sub>11</sub> [M + H<sup>+</sup>] = 892.50, found 893.30.

HRMS (ESI-TOF): M+H<sup>+</sup>, found 892.4990 C<sub>39</sub>H<sub>67</sub>N<sub>13</sub>O<sub>11</sub> requires 892.5004

<sup>1</sup>H NMR (600 MHz, CDCl<sub>3</sub>, 298K): δ = 0.75-0.80 (t, *J* = 7.41 Hz, 3H, CH<sub>3</sub>δ Ile); 0.82-0.85 (d, *J* = 6.83 Hz, 3H, CH<sub>3</sub>γ Ile); 1.07-1.15 & 1.37-1.44 (m, 2H, CH<sub>2</sub>γ Ile); 1.22-1.27 (dd, *J* = 10.88, 7.29 Hz, 3H, CH<sub>3</sub>β Ala); 1.22-1.34 (m, 2H, CH<sub>2</sub>γ Lys); 1.47-1.60 (m, 2H, CH<sub>2</sub>δ Lys); 1.55-1.63 (m, 2H, CH<sub>2</sub>γ Arg); 1.62-1.79 (m, 2H, CH<sub>2</sub>β Lys); 1.71-1.81 (m, 2H, CH<sub>2</sub>β Arg); 1.73-1.83 (m, 2H, CHβ Ile); 2.71-2.81 (m, 2H, CH<sub>2</sub>β Asn); 2.82-2.98 (m, 2H, CH<sub>2</sub>β Tyr); 2.85-2.92 (m, 2H, CH<sub>2</sub>δ Arg); 3.08-3.16 (m, 2H, CH<sub>2</sub>ε Lys); 3.84-3.94 (m, 2H, CH<sub>2</sub> Gly); 3.84-3.92 (m, 2H, CHα Arg); 4.08-4.12 (d, *J* = 8.65 Hz, 1H, CHα Ile); 4.17-4.24 (m, 1H, CHα Ala); 4.19-4.27 (m, 1H, CHα Lys); 4.26-4.33 (m, 1H, CHα Ala); 4.39-4.47 & 4.48-4.52 (m, 1H, CHα Tyr); 4.65-4.73 (m, 1H, CHα Asn); 6.72-6.76 & 7.12-7.15 (d, *J* = 8.29 Hz, 2H, Ph Tyr); 7.03-7.06 & 7.17-7.20 (d, *J* = 8.29 Hz, 2H, Ph Tyr).

<sup>13</sup>C NMR (150 MHz, CDCl<sub>3</sub>, 298K): δ = 9.99, 14.65, 16.63, 21.09, 24.34, 24.50, 26.26, 28.05, 30.32, 36.03, 36.25, 38.99, 40.53, 42.18, 49.24, 49.28, 52.67, 53.19, 54.65, 55.03, 58.29, 113.40, 115.33, 117.26, 119.23, 121.41, 128.01, 130.49, 154.38, 156.69, 162.78, 169.04, 170.73, 172.46, 173.30, 173.77, 173.80, 173.95, 174.03, 174.06, 174.65.

## Experimental Procedures for 8.2 CYC

### cyclo-Asn(Trt)-Gly-Ile-Arg(Pbf)-Ala-Tyr(tBu)-Ala-Lys(Boc)

The macrocycle Asn(Trt)-Gly-Ile-Arg(Pbf)-Ala-Tyr(tBu)-Ala-Lys(Boc) was synthesized following the "Syringe pump macrocyclization" procedure utilizing 321 mg (0.208 mmol, 1.0 equivalent) of DDL P HO-Asn(Trt)-Gly-Ile-Arg(Pbf)-Ala-Tyr(tBu)-Ala-Lys(Boc)-NH<sub>2</sub>, 0.220 mL (1.25 mmol, 6.0 equivalents) of DIPEA, 33.5 mg (0.104 mmol, 0.5 equivalents) of TBTU, 79.2 mg (0.208 mmol, 1.0 equivalents) HATU, and 29.0 mg (0.104 mmol, 0.5 equivalents) of DMTMM in 208 mL CH<sub>2</sub>Cl<sub>2</sub>. The crude reaction was dried *in vacuo* to yield 361 mg of macrocycle. The macrocycle was taken onto the next reaction without further purification.

### cyclo-Asn-Gly-Ile-Arg-Ala-Tyr-Ala-Lys

Macrocycle Asn-Gly-Ile-Arg-Ala-Tyr-Ala-Lys was synthesized utilizing 107 mg (0.070 mmol, 1.0 equivalent) of the Macrocycle Asn(Trt)-Gly-Ile-Arg(Pbf)-Ala-Tyr(tBu)-Ala-Lys(Boc), 15.0 mL (0.140 mmol, 2.0 equivalents) of Anisole, 0.35 mL of TFA and 0.35 mL of CH<sub>2</sub>Cl<sub>2</sub>. The resulting slurry was dried *in vacuo*. The residue was redissolved in MeOH, and the solution was centrifuged. The supernatant was injected into the HPLC to yield Macrocycle Asn-Gly-Ile-Arg-Ala-Tyr-Ala-Lys (11.4 mg, overall 19%). LCMS: *m/z* calcd for C<sub>39</sub>H<sub>64</sub>N<sub>13</sub>O<sub>10</sub> (M + H<sup>+</sup>) = 874.49, found 874.15.

HRMS (ESI-TOF): M+H<sup>+</sup>, found 874.4880 C<sub>39</sub>H<sub>65</sub>N<sub>13</sub>O<sub>10</sub> requires 874.4899

<sup>1</sup>H NMR (600 MHz, CDCl<sub>3</sub>, 308K): δ = 0.89-0.95 (m, 3H, CH<sub>3</sub>δ Ile); 0.92-0.98 (m, 3H, CH<sub>3</sub>γ Ile); 1.27-1.30 & 1.44-1.46 (d, *J* = 7.27 Hz, 3H, CH<sub>3</sub>β Ala); 1.36-1.42 (m, 3H, CH<sub>3</sub>β Ala); 1.21-1.26 & 1.53-1.61 (m, 2H, CH<sub>2</sub>γ Ile); 1.38-1.55 (m, 2H, CH<sub>2</sub>γ Lys); 1.62-1.72 (m, 2H, CH<sub>2</sub>δ Lys); 1.65-1.77 (m, 2H, CH<sub>2</sub>γ Arg); 1.77-1.81 & 1.90-1.94 (m, 2H, CH<sub>2</sub>β Lys); 1.78-1.88 (m, 2H, CH<sub>2</sub>β Arg); 1.87-1.94 (m, 2H, CHβ Ile); 2.80-2.91 (m, 2H, CH<sub>2</sub>β Asn); 2.98-3.09 (m, 2H, CH<sub>2</sub>β Tyr); 3.17-3.30 (m, 2H, CH<sub>2</sub>δ Arg); 3.20-3.28 (m, 2H, CH<sub>2</sub>ε Lys); 3.62-3.66 & 3.72-3.81 (m, 1H, CHα Arg); 3.81-3.84 & 3.85-3.89 & 3.99-4.03 & 4.12-4.15 & 4.17-4.19 (m, 2H, CH<sub>2</sub> Gly); 4.10-4.16 & 4.23-4.30 & 4.32-4.40 (m, 1H, CHα Ala); 4.15-4.19 & 4.21-4.29 (m, 1H, CHα Ile); 4.22-4.27 & 4.34-4.41 (m, 1H, CHα Lys); 4.49-4.53 & 4.54-4.59 & 4.59-4.64 (m, 1H, CHα Tyr); 4.71-4.75 & 4.77-4.83 & 4.86-4.92 (m, 1H, CHα Asn); 6.84-6.96 (m, 2H, Ph Tyr); 7.12-7.23 (m, 2H, Ph Tyr).

<sup>13</sup>C NMR (150 MHz, CDCl<sub>3</sub>, 308K): δ = 10.13, 14.66, 15.47, 15.61, 16.37, 17.70, 22.15, 24.37, 24.87, 24.99, 26.12, 29.04, 29.90, 35.70, 36.03, 39.22, 40.54, 42.55, 42.75, 42.42, 42.80, 49.42, 50.08, 50.22, 50.55, 51.26, 51.91,

## Supporting Information

52.71, 53.04, 53.28, 54.36, 54.40, 54.97, 55.16, 58.35, 59.10, 113.40, 115.40, 117.26, 119.23, 121.41, 128.01, 130.31, 154.38, 156.69, 162.78, 169.04, 170.73, 172.46, 173.30, 173.77, 173.80, 173.95, 174.03, 174.06, 174.65.

### Synthesis of TPR Peptide

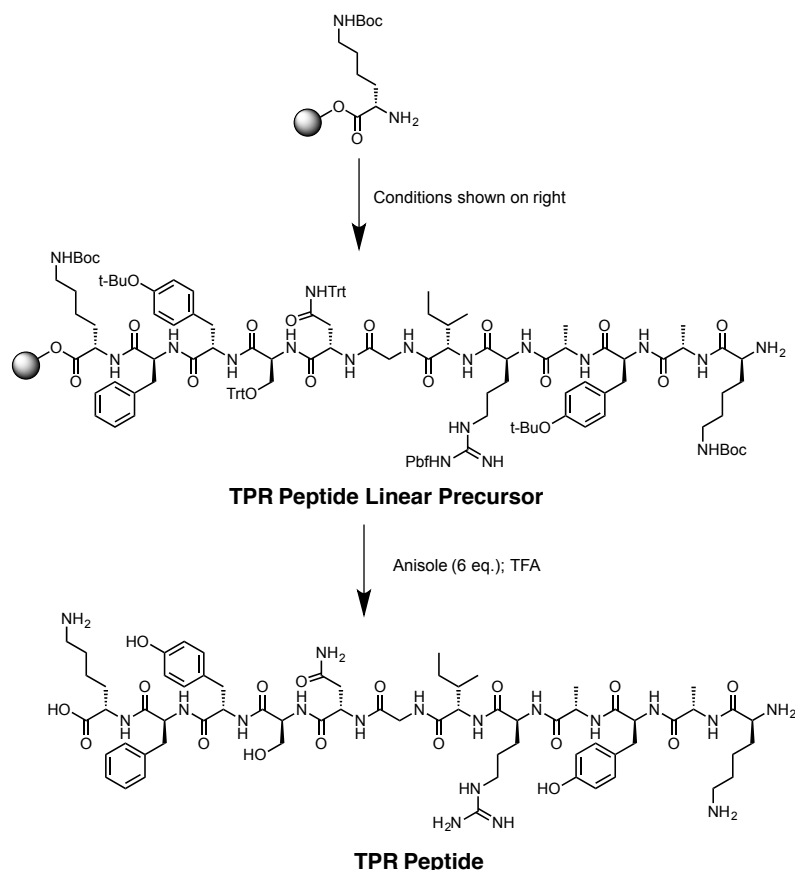

#### Coupling Reaction Conditions

- (a) Fmoc-Phe-OH (3 equiv.); HOAt (3 equiv.); DIC (6 equiv.) in DMF (0.2 M)  
(b) 20% Piperidine in DMF
- (a) Fmoc-Tyr(t-Bu)-OH (3 equiv.); HOBT (3 equiv.); DIC (6 equiv.) in DMF (0.2 M)  
(b) 20% Piperidine in DMF
- (a) Fmoc-Ser(Trt)-OH (3 equiv.); HOBT (3 equiv.); DIC (6 equiv.) in DMF (0.2 M)  
(b) 20% Piperidine in DMF
- (a) Fmoc-Asn(Trt)-OH (3 equiv.); HOBT (3 equiv.); DIC (6 equiv.) in DMF (0.2 M)
- (a) Fmoc-Gly-OH (3 equiv.); HOBT (3 equiv.); DIC (6 equiv.) in DMF (0.2 M)  
(b) 20% Piperidine in DMF
- (a) Fmoc-Ile-OH (3 equiv.); HOBT (3 equiv.); DIC (6 equiv.) in DMF (0.2 M)  
(b) 20% Piperidine in DMF
- (a) Fmoc-Arg(Pbf)-OH (3 equiv.); HOBT (3 equiv.); DIC (6 equiv.) in DMF (0.2 M)  
(b) 20% Piperidine in DMF
- (a) Fmoc-Ala-OH (3 equiv.); HOAt (3 equiv.); DIC (6 equiv.) in DMF (0.2 M)  
(b) 20% Piperidine in DMF
- (a) Fmoc-Tyr(t-Bu)-OH (3 equiv.); HOBT (3 equiv.); DIC (6 equiv.) in DMF (0.2 M)  
(b) 20% Piperidine in DMF
- (a) Fmoc-Ala-OH (3 equiv.); HOBT (3 equiv.); DIC (6 equiv.) in DMF (0.2 M)  
(b) 20% Piperidine in DMF
- (a) Fmoc-Lys(Boc)-OH (3 equiv.); HOBT (3 equiv.); DIC (6 equiv.) in DMF (0.2 M)  
(b) 20% Piperidine in DMF

### Experimental Procedures for TPR Peptide

#### Resin-O-Lys(Boc)-Phe-Tyr(t-Bu)-Ser(Trt)-Asn(Trt)-Gly-Ile-Arg(Pbf)-Ala-Tyr(t-Bu)-Ala-Lys(Boc)-NH<sub>2</sub>

Resin-bound dodecapeptide Resin-O-Lys(Boc)-Phe-Tyr(t-Bu)-Ser(Trt)-Asn(Trt)-Gly-Ile-Arg(Pbf)-Ala-Tyr(t-Bu)-Ala-Lys(Boc)-NH<sub>2</sub> was synthesised using a Biotage Initiator + Alstra Automated Microwave Peptide Synthesiser. 0.50 g H-Lys(Boc)-2-ClTrt resin was weighed and added to a 10 mL-capacity dedicated reactor vial. All amino acids were pre-dissolved in DMF to produce 3 mL solutions with concentrations of 0.25 M. Coupling reagents HOBT and HOAt were dissolved separately in a mix of DIC and DMF (1:1 v/v) also with concentrations of 0.25 M. The system was set up according to the manufacturer's protocol.

The resin underwent sequential coupling reactions with each amino acid as described in the *Coupling Reaction* procedure, with the following modifications:

- Reaction time was shortened to 35 minutes
- Reaction temperature was increased to 70°C

Fmoc removal washes were performed as described in the *Fmoc Removal* procedure. Once the final amino acid coupling reaction was complete, the system automatically performed the pre-cleavage washes as described in the *Cleavage* procedure. Once the synthesis was complete, the resin-bound peptide was removed from the system and dried *in vacuo* overnight.

#### HO-Lys(Boc)-Phe-Tyr(t-Bu)-Ser(Trt)-Asn(Trt)-Gly-Ile-Arg(Pbf)-Ala-Tyr(t-Bu)-Ala-Lys(Boc)-NH<sub>2</sub>

The linear dodecapeptide HO-Lys(Boc)-Phe-Tyr(t-Bu)-Ser(Trt)-Asn(Trt)-Gly-Ile-Arg(Pbf)-Ala-Tyr(t-Bu)-Ala-Lys(Boc)-NH<sub>2</sub> was generated following the *Cleavage* procedure. The linear peptide was cleaved from the resin using a mixed solution of 3.3 mL of TFE and 3.3 mL of CH<sub>2</sub>Cl<sub>2</sub>. The resin-containing solution was filtered and dried *in vacuo* to yield HO-Lys(Boc)-Phe-Tyr(t-Bu)-Ser(Trt)-Asn(Trt)-Gly-Ile-Arg(Pbf)-Ala-Tyr(t-Bu)-Ala-Lys(Boc)-NH<sub>2</sub> (156 mg, overall 25%).

#### HO-Lys-Phe-Tyr-Ser-Asn-Gly-Ile-Arg-Ala-Tyr-Ala-Lys-NH<sub>2</sub>

The free linear peptide HO-Lys-Phe-Tyr-Ser-Asn-Gly-Ile-Arg-Ala-Tyr-Ala-Lys-NH<sub>2</sub> was generated by removing the side chain protecting groups on HO-Lys(Boc)-Phe-Tyr(t-Bu)-Ser(Trt)-Asn(Trt)-Gly-Ile-Arg(Pbf)-Ala-Tyr(t-Bu)-Ala-

## Supporting Information

Lys(Boc)-NH<sub>2</sub>. 156 mg HO-Lys(Boc)-Phe-Tyr(t-Bu)-Ser(Trt)-Asn(Trt)-Gly-Ile-Arg(Pbf)-Ala-Tyr(t-Bu)-Ala-Lys(Boc)-NH<sub>2</sub> (0.063 mmol, 1 eq.) was deprotected using a mixture of 624  $\mu$ L of TFA and anisole (14 eq.).

The free linear peptide was then purified by washing with MeOH. MeOH was added to the crude, dry linear peptide and the suspension was vortexed before undergoing centrifugation. The supernatant was removed and this process was repeated until the supernatant was observed to be clear and colourless for 3 successive washes. This generated pure final compound **12 LIN** in a 16% yield as a white solid.

LC/MS (ESI)  $m/z$ :  $[M+3H]^{3+}$  calcd for C<sub>66</sub>H<sub>100</sub>N<sub>18</sub>O<sub>17</sub>, 473.25; found, 473.15.

HRMS (ESI-TOF)  $m/z$ :  $[M+2H]^{2+}$  calcd for C<sub>66</sub>H<sub>100</sub>N<sub>18</sub>O<sub>17</sub>, 709.3800; found, 709.3831.

<sup>1</sup>H NMR (600 MHz, D<sub>2</sub>O)  $\delta$  7.56-7.21 (m, 5H, Phe), 7.21-7.01 (dd,  $J$  = 8.43, 16.29 Hz, 4H,  $\delta$ H Tyr), 7.01-6.92 (dd,  $J$  = 8.35, 21.19 Hz, 4H,  $\epsilon$ H Tyr), 4.91-4.87 (t,  $J$  = 6.12 Hz, 1H,  $\alpha$ H Asn), 4.57-4.52 (m, 1H,  $\alpha$ H Ser), 4.57-4.52 (m, 1H,  $\alpha$ H Ala), 4.51-4.46 (m, 1H,  $\alpha$ H Arg), 4.51-4.46 (m, 1H,  $\alpha$ H Ala), 4.42-4.32 (m, 1H,  $\alpha$ H Ile), 4.42-4.32 (t, 1H,  $\alpha$ H Lys), 4.23-4.04 (m, 1H,  $\alpha$ H Lys), 4.23-4.04 (m, 2H,  $\alpha$ CH<sub>2</sub> Gly), 3.96-3.87 (m, 2H,  $\beta$ CH<sub>2</sub> Ser), 3.38-3.24 (m, 2H,  $\delta$ CH<sub>2</sub> Arg), 3.38-3.24 & 3.24-2.84 (m, 2H,  $\beta$ CH<sub>2</sub> Phe), 3.24-2.84 (m, 4H,  $\epsilon$ CH<sub>2</sub> Lys), 3.24-2.84 (m, 4H,  $\beta$ CH<sub>2</sub> Tyr), 3.24-2.84 (m, 2H,  $\beta$ CH<sub>2</sub> Asn), 2.08-1.93 (m, 1H,  $\beta$ H Ile), 2.08-1.93 & 1.93-1.80 (m, 2H,  $\beta$ CH<sub>2</sub> Arg), 2.08-1.93 & 1.93-1.80 (m, 4H,  $\beta$ CH<sub>2</sub> Lys), 1.93-1.80 (m, 4H,  $\delta$ CH<sub>2</sub> Lys), 1.80-1.68 (m, 2H,  $\gamma$ CH<sub>2</sub> Arg), 1.67-1.59 & 1.39-1.29 (m, 2H,  $\gamma$ CH<sub>2</sub> Ile), 1.59-1.43 (m, 4H,  $\gamma$ CH<sub>2</sub> Lys), 1.59-1.43 (m, 6H, CH<sub>3</sub> Ala), 1.11-1.05 (d,  $J$  = 6.72 Hz, 3H,  $\delta$ CH<sub>3</sub> Ile), 1.05-0.98 (t,  $J$  = 7.38 Hz, 3H,  $\gamma$ CH<sub>3</sub> Ile).

### Synthesis of MEEVD Peptide

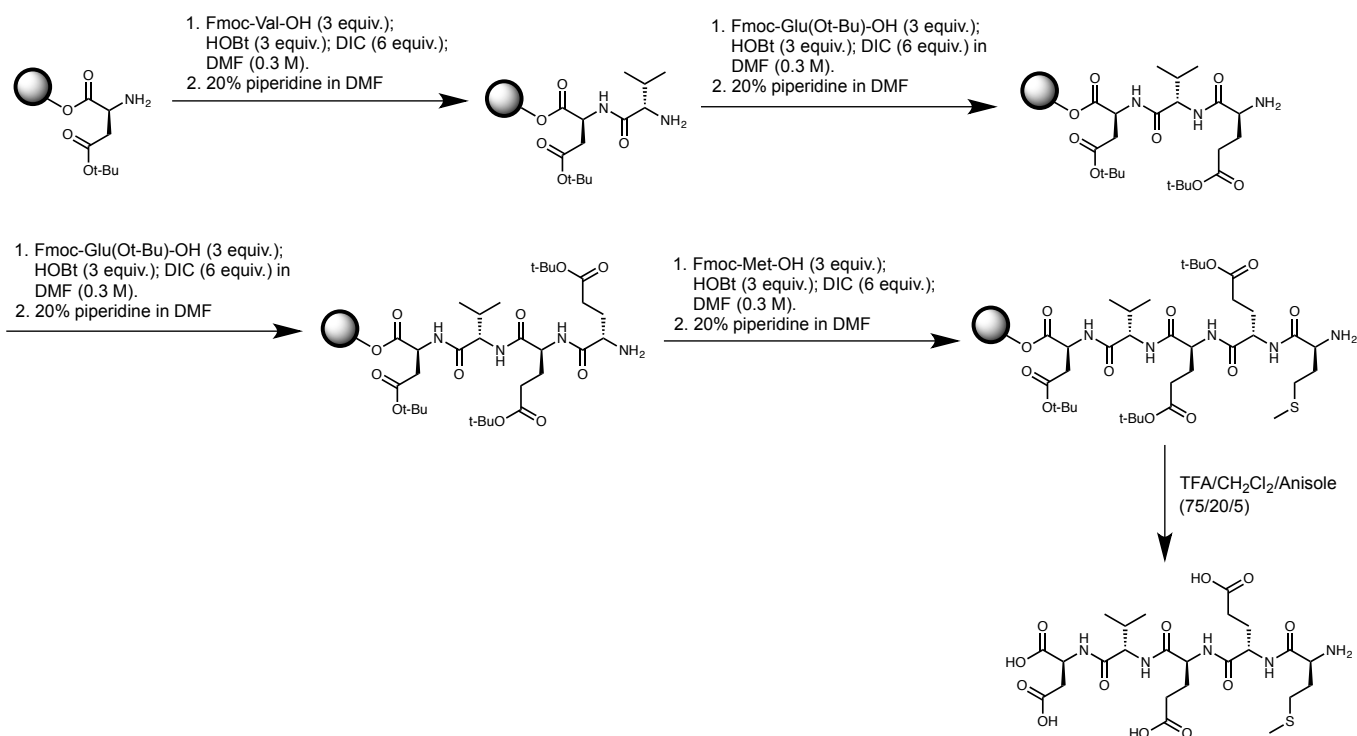

### Experimental Procedures for MEEVD Peptide

#### Resin-O-Asp(Ot-Bu)-Val-NH<sub>2</sub>

The resin-bound dipeptide Resin-O-Asp(Ot-Bu)-Val-NH<sub>2</sub> was synthesised following the *Coupling Reaction* procedure using 1.0 g H-Asp(Ot-Bu)-2-CITrt resin (0.50 mmol, 1 eq.), 0.51 g Fmoc-Val-OH (1.5 mmol, 3 eq.), 0.20 g HOBT (1.5 mmol, 3 eq.), 0.46 mL DIC (3.0 mmol, 6 eq.) and 5.0 mL DMF to generate a concentration of 0.30 M. The coupling reaction was run over 4 hours and a negative ninhydrin test was used to confirm the reaction was complete. The reaction mixture was then drained to produce Resin-O-Asp(Ot-Bu)-Val-NHFmoc. The Fmoc protecting group was removed following the *Fmoc Removal* procedure and a positive ninhydrin test was used to confirm complete removal, producing Resin-O-Asp(Ot-Bu)-Val-NH<sub>2</sub>.

#### Resin-O-Asp(Ot-Bu)-Val-Glu(Ot-Bu)-NH<sub>2</sub>

The resin-bound tripeptide Resin-O-Asp(Ot-Bu)-Val-Glu(Ot-Bu)-NH<sub>2</sub> was synthesised following the *Coupling Reaction* procedure using Resin-O-Asp(Ot-Bu)-Val-NH<sub>2</sub> synthesised from previous coupling reaction, together with 0.64 g Fmoc-Glu(Ot-Bu)-OH (1.5 mmol, 3 eq.), 0.20 g HOBT (1.5 mmol, 3 eq.), 0.46 mL DIC (3.0 mmol, 6 eq.) and 5.0 mL DMF to generate a concentration of 0.30 M. The coupling reaction was run for 4 hours and a negative



## Supporting Information

ninhydrin test was used to confirm the reaction was complete. The reaction mixture was then drained to produce Resin-O-Asp(Ot-Bu)-Val-Glu(Ot-Bu)-NHfmoc. The Fmoc protecting group was removed following the *Fmoc Removal* procedure and a positive ninhydrin test was used to confirm complete removal, producing Resin-O-Asp(Ot-Bu)-Val-Glu(Ot-Bu)-NH<sub>2</sub>.

### Resin-O-Asp(Ot-Bu)-Val-Glu(Ot-Bu)-Glu(Ot-Bu)-NH<sub>2</sub>

The resin-bound tetrapeptide Resin-O-Asp(Ot-Bu)-Val-Glu(Ot-Bu)-Glu(Ot-Bu)-NH<sub>2</sub> was synthesised following the *Coupling Reaction* procedure using Resin-O-Asp(Ot-Bu)-Val-Glu(Ot-Bu)-NH<sub>2</sub> synthesised from previous coupling reaction, together with 0.64 g Fmoc-Glu(Ot-Bu)-OH (1.5 mmol, 3 eq.), 0.20 g HOBt (1.5 mmol, 3 eq.), 0.46 mL DIC (3.0 mmol, 6 eq.) and 5.0 mL DMF to generate a concentration of 0.30 M. The coupling reaction was run for 4 hours and a negative ninhydrin test was used to confirm the reaction was complete. The reaction mixture was then drained to produce Resin-O-Asp(Ot-Bu)-Val-Glu(Ot-Bu)-Glu(Ot-Bu)-NHfmoc. The Fmoc protecting group was removed following the *Fmoc Removal* procedure and a positive ninhydrin test was used to confirm complete removal, producing Resin-O-Asp(Ot-Bu)-Val-Glu(Ot-Bu)-Glu(Ot-Bu)-NH<sub>2</sub>.

### Resin-O-Asp(O-tBu)-Val-Glu(Ot-Bu)-Glu(Ot-Bu)-Met-NH<sub>2</sub>

The resin-bound pentapeptide Resin-O-Asp(O-tBu)-Val-Glu(Ot-Bu)-Glu(Ot-Bu)-Met-NH<sub>2</sub> was synthesised following the *Coupling Reaction* procedure using Resin-O-Asp(Ot-Bu)-Val-Glu(Ot-Bu)-Glu(Ot-Bu)-NH<sub>2</sub> synthesised from previous coupling reaction, together with 0.56 g Fmoc-Met-OH (1.5 mmol, 3 eq.), 0.20 g HOBt (1.5 mmol, 3 eq.), 0.46 mL DIC (3.0 mmol, 6 eq.) and 5.0 mL DMF to generate a concentration of 0.30 M. The coupling reaction was run for 4 hours and a negative ninhydrin test was used to confirm the reaction was complete. The reaction mixture was then drained to produce Resin-O-Asp(O-tBu)-Val-Glu(Ot-Bu)-Glu(Ot-Bu)-Met-NHFmoc. The Fmoc protecting group was removed following the *Fmoc Removal* procedure and a positive ninhydrin test was used to confirm complete removal, producing Resin-O-Asp(O-tBu)-Val-Glu(Ot-Bu)-Glu(Ot-Bu)-Met-NH<sub>2</sub>.

### HO-Asp-Val-Glu-Glu-Met-NH<sub>2</sub>

The linear pentapeptide HO-Asp-Val-Glu-Glu-Met-NH<sub>2</sub> was generated by simultaneously cleaving the resin and deprotecting the side chain protecting groups using a mixture of TFA/CH<sub>2</sub>Cl<sub>2</sub>/Anisole (75/24/1) at a concentration of 10 mL/g of resin. The resin-containing solution was filtered and dried *in vacuo* to yield HO-Asp-Val-Glu-Glu-Met-NH<sub>2</sub> as a white solid (560 mg, overall 81%). The free linear peptide was then precipitated in methanol and pelleted by centrifugation then dried *in vacuo* to generate pure final compound **MEEVD Peptide** in a 60% yield as a white solid.

<sup>1</sup>H NMR (600 MHz, D<sub>2</sub>O) δ 4.49-4.44 (dd, *J* = 7.6, 5.1 Hz, 1H, αH Asp), 4.38-4.29 (m, 2H, αH Glu), 4.13-4.05 (dd, *J* = 7.7, 6.0 Hz, 1H, αH Val), 3.68-3.60 (m, 1H, αH Met), 2.81-2.66 (m, 2H, βCH<sub>2</sub> Asp), 2.60-2.49 (m, 2H, γCH<sub>2</sub> Met), 2.44-2.27 (m, 4H, γCH<sub>2</sub> Glu), 2.16-2.08 & 2.08-1.97 (m, 3H, δCH<sub>3</sub> Met), 2.08-1.97 (m, 5H, βCH<sub>2</sub> Glu & αH Val), 1.96-1.86 (m, 2H, βCH<sub>2</sub> Met), 0.90-0.84 (dd, *J* = 7.7, 6.8 Hz, 6H, γCH<sub>3</sub> Val).

# Supporting Information

## 5.1 LIN: <sup>1</sup>H NMR and <sup>13</sup>C NMR

5.1 LIN FREE - D2O - 1H

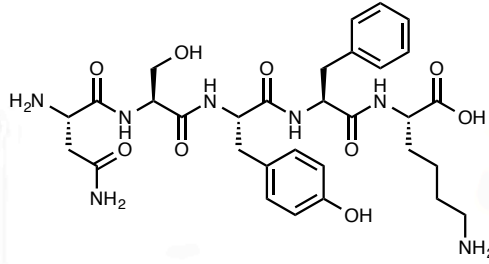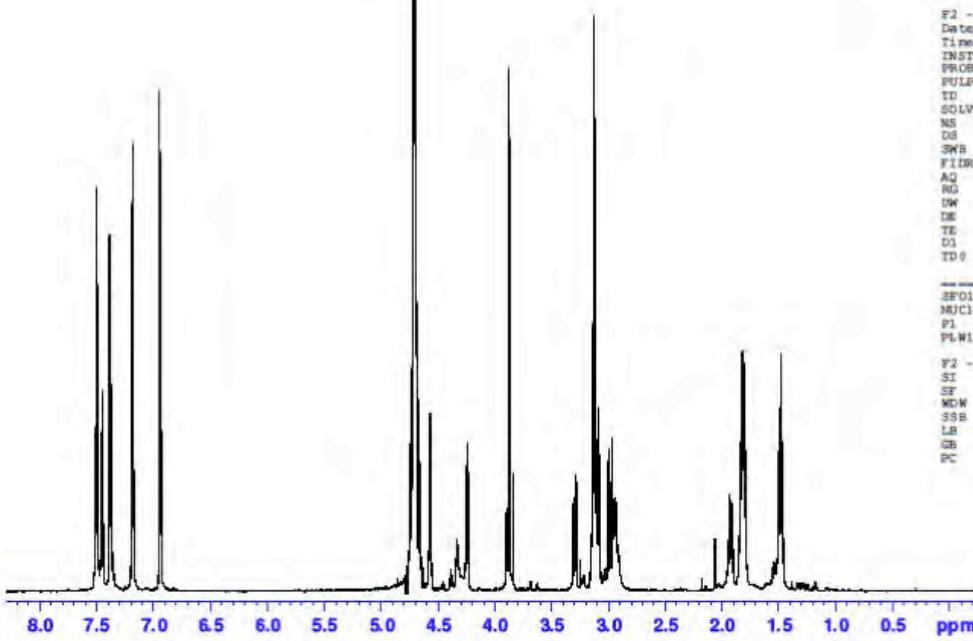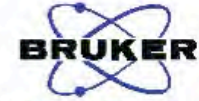

Current Data Parameters  
 NAME 140930-1kb  
 EXPNO 1  
 PROCNO 1

F2 - Acquisition Parameters  
 Date\_ 20141001  
 Time 18.32  
 INSTRUM spect  
 PROBRD 5 mm CPTCI 1H/  
 PULPROG zg  
 TD 65536  
 SOLVENT D2O  
 NS 8  
 DS 0  
 SWH 9009.009 Hz  
 FIDRES 0.137467 Hz  
 AQ 3.6372480 sec  
 RG 25.04  
 DW 55.500 usec  
 DE 33.22 usec  
 TE 318.0 K  
 D1 5.0000000 sec  
 TDO 1

----- CHANNEL f1 -----  
 SFO1 600.1639010 MHz  
 NUCL1 1H  
 P1 8.00 usec  
 PLW1 3.81069994 W

F2 - Processing parameters  
 SI 131072  
 SF 600.1600000 MHz  
 MDW EM  
 SSB 0  
 LB 0.30 Hz  
 GB 0  
 PC 1.00

5.1 LIN FREE - D2O - 13C

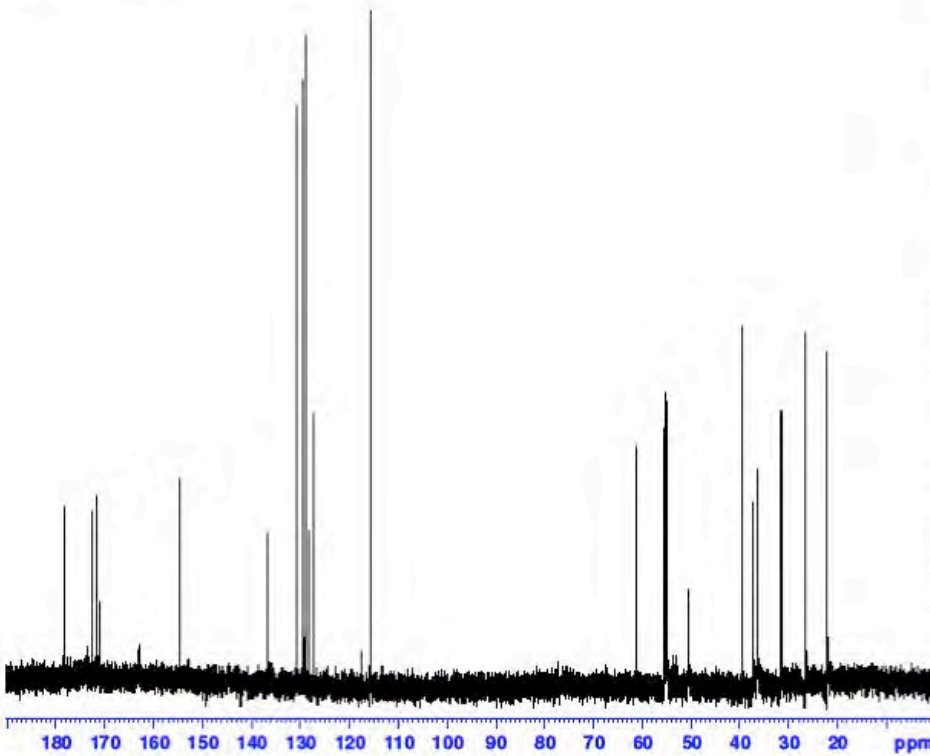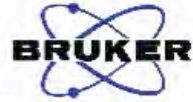

Current Data Parameters  
 NAME 140930-1kb  
 EXPNO 2  
 PROCNO 1

F2 - Acquisition Parameters  
 Date\_ 20141001  
 Time 23.00  
 INSTRUM spect  
 PROBRD 5 mm CPTCI 1H/  
 PULPROG zgpg30  
 TD 65536  
 SOLVENT D2O  
 NS 5120  
 DS 4  
 SWH 33333.332 Hz  
 FIDRES 0.508626 Hz  
 AQ 0.9830400 sec  
 RG 202.23  
 DW 15.000 usec  
 DE 15.55 usec  
 TE 318.0 K  
 D1 2.0000000 sec  
 D11 0.0300000 sec  
 TDO 1

----- CHANNEL f1 -----  
 SFO1 150.9254430 MHz  
 NUCL1 13C  
 P1 11.50 usec  
 PLW1 100.0000000 W

----- CHANNEL f2 -----  
 SFO2 600.1624006 MHz  
 NUCL2 1H  
 CPDPRG2 bt\_waltz63\_256  
 PCPD2 70.00 usec  
 PLW2 3.81069994 W  
 PLW12 0.04917200 W  
 PLW13 0.02438800 W

F2 - Processing parameters  
 SI 32768  
 SF 150.9103520 MHz  
 MDW EM  
 SSB 0  
 LB 1.00 Hz  
 GB 0  
 PC 1.00

Supporting Information

5.1 LIN:  $^1\text{H}$ - $^{13}\text{C}$  HSQC NMR and  $^1\text{H}$ - $^{13}\text{C}$  HMBC NMR

5.1 LIN FREE - D2O - HSQC

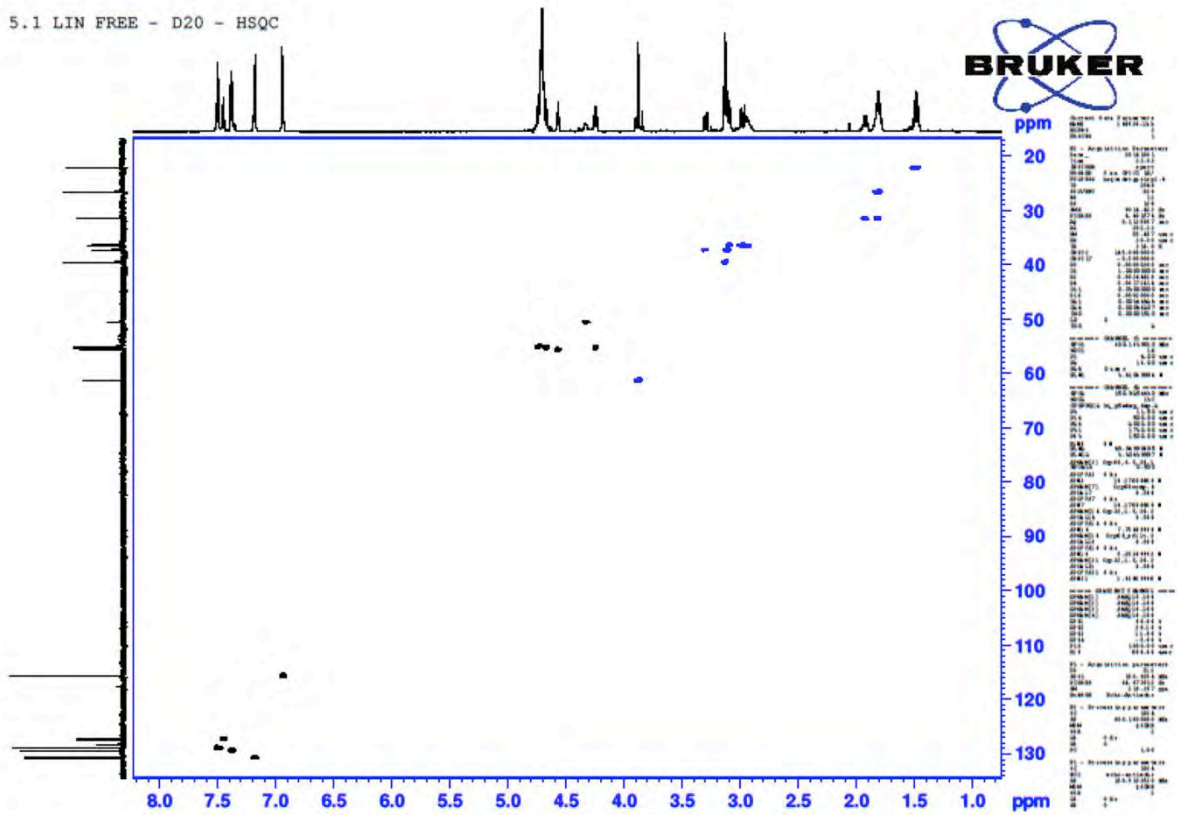

5.1 LIN FREE - D2O - HMBC

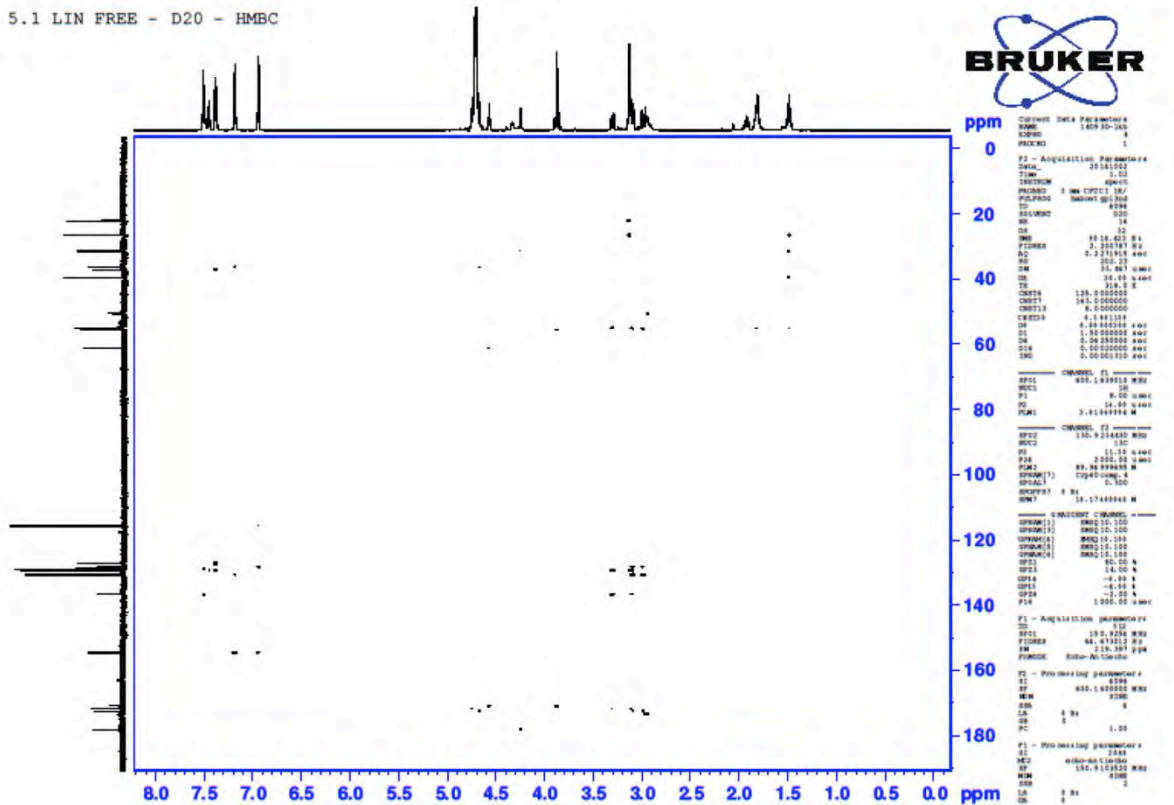

# Supporting Information

## 5.1 LIN: $^1\text{H}$ - $^1\text{H}$ COSY NMR and HRMS

5.1 LIN FREE - D2O - COSY

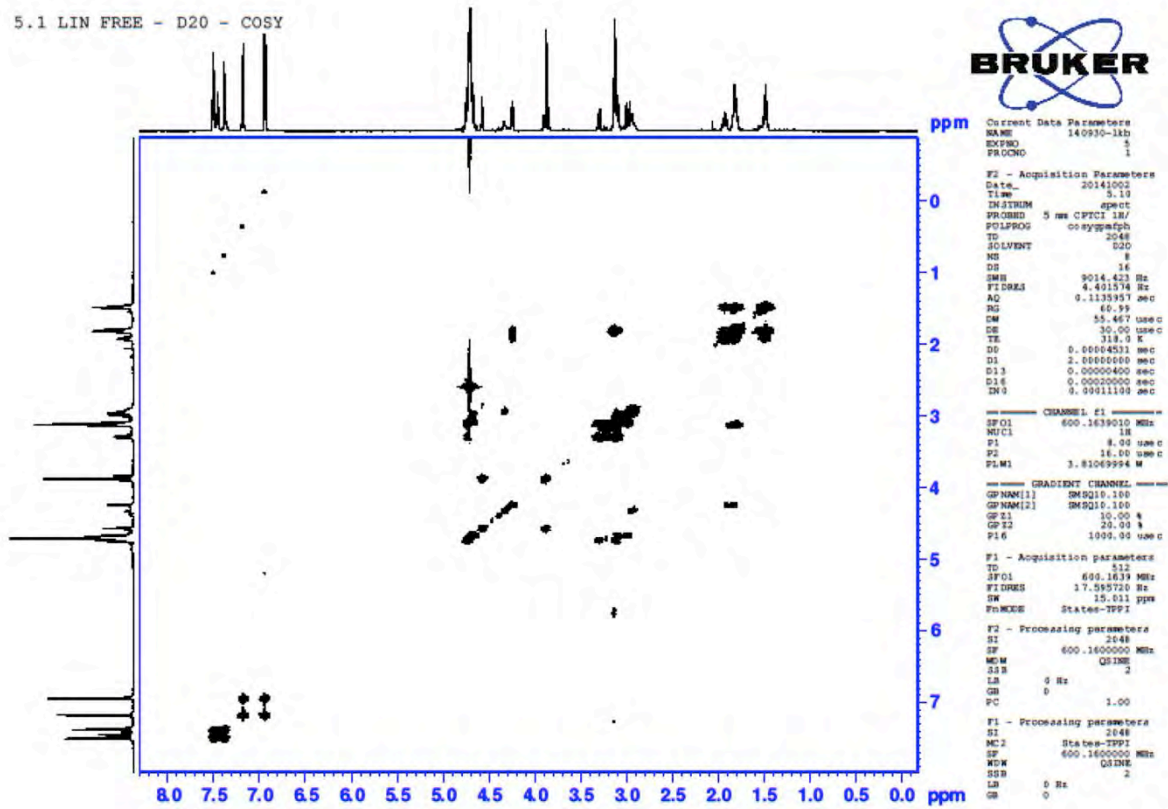

L-1\_Pos\_Full#7 RT: 0.35 AV: 1 NL: 6.50E7  
 T: FTMS + c.NSI Full ms [50.00-2000.00]

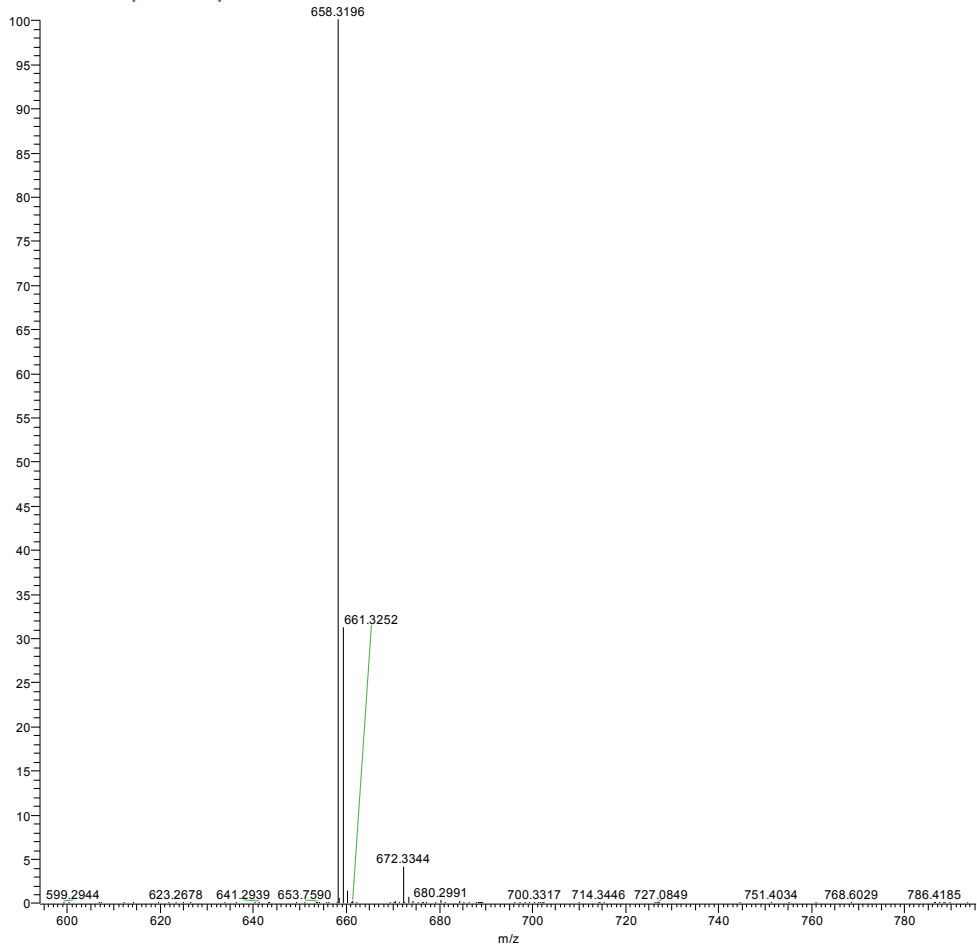

Supporting Information

5.1 LIN: LC/MS

==== Shimadzu LCMSsolution Analysis Report ====

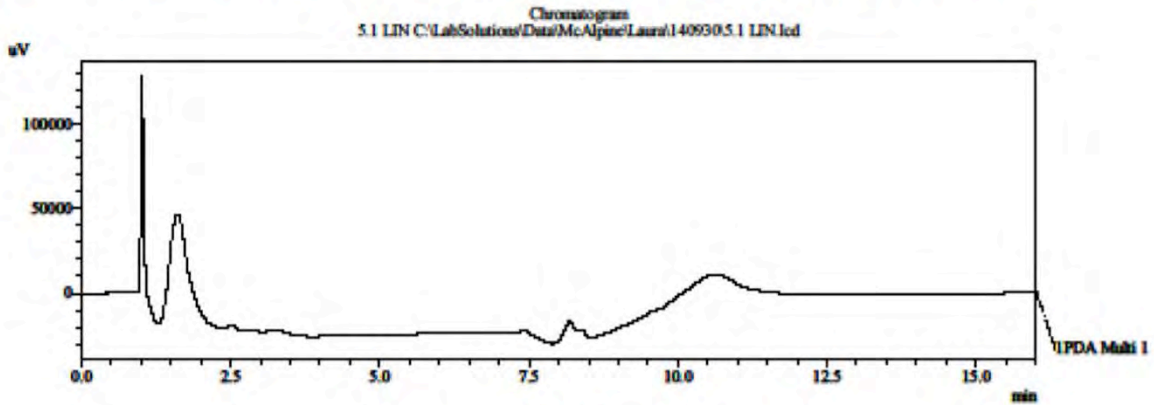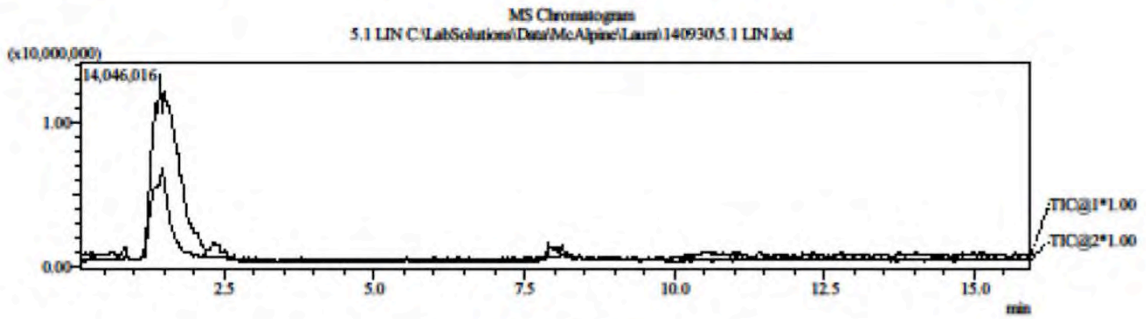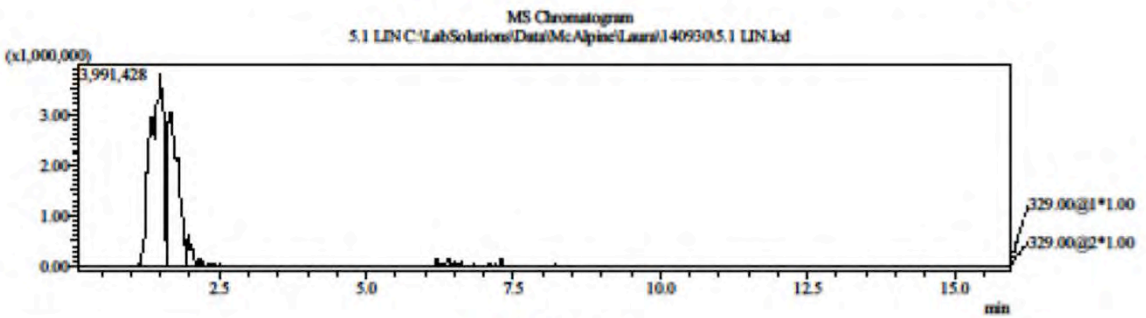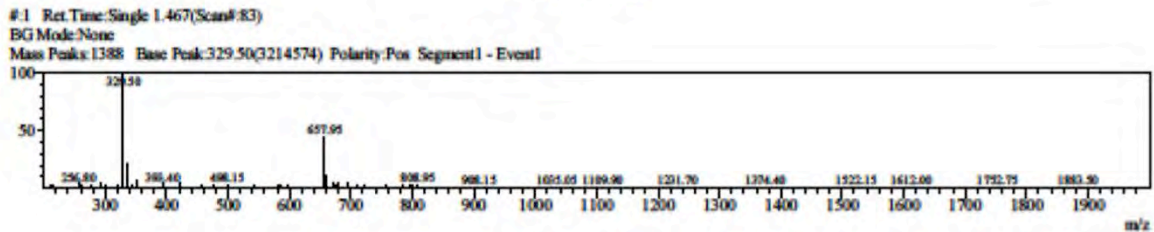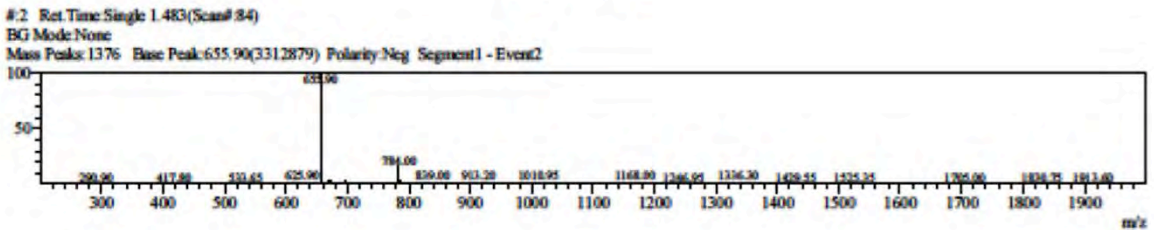

## Supporting Information

### 5.1 CYC: $^1\text{H}$ NMR and $^{13}\text{C}$ NMR

5.1 CYC FREE - D2O -  $^1\text{H}$

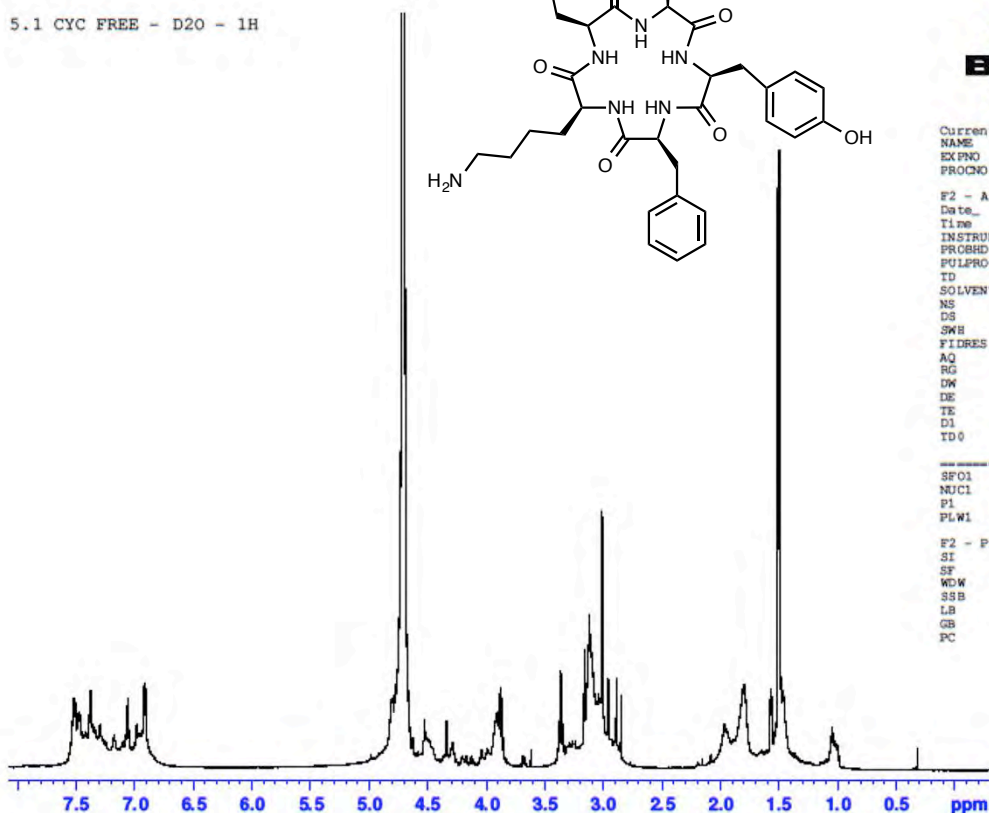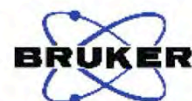

Current Data Parameters  
 NAME 140913-lkb-1conmr  
 EXPNO 1  
 PROCNO 1

F2 - Acquisition Parameters  
 Date\_ 20140913  
 Time 1.33  
 INSTRUM spect  
 PROBHD 5 mm PABBO BB-  
 PULPROG zg  
 TD 65536  
 SOLVENT D2O  
 NS 16  
 DS 8  
 SWH 9009.009 Hz  
 FIDRES 0.137467 Hz  
 AQ 3.6372480 sec  
 RG 45.2  
 DW 55.500 usec  
 DE 9.17 usec  
 TE 318.0 K  
 D1 5.0000000 sec  
 TD0 1

CHANNEL f1  
 SFO1 600.1339008 MHz  
 NUC1  $^1\text{H}$   
 P1 13.08 usec  
 PLW1 16.5960067 W

F2 - Processing parameters  
 SI 131072  
 SF 600.1300000 MHz  
 WDW EM  
 SSB 0  
 LB 0.30 Hz  
 GB 0  
 PC 1.00

5.1 CYC FREE - D2O -  $^{13}\text{C}$

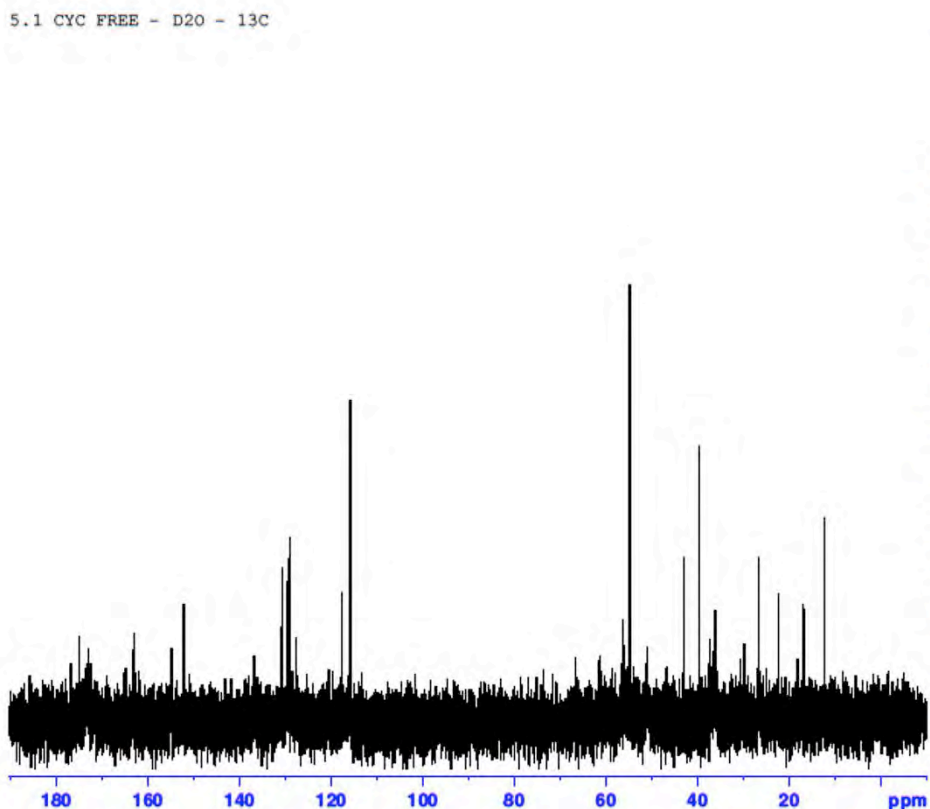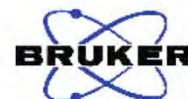

Current Data Parameters  
 NAME 140913-lkb-1conmr  
 EXPNO 6  
 PROCNO 1

F2 - Acquisition Parameters  
 Date\_ 20140913  
 Time 15.23  
 INSTRUM spect  
 PROBHD 5 mm PABBO BB-  
 PULPROG zgpg30  
 TD 65536  
 SOLVENT D2O  
 NS 3940  
 DS 4  
 SWH 30241.936 Hz  
 FIDRES 0.461455 Hz  
 AQ 1.0835285 sec  
 RG 2050  
 DW 16.533 usec  
 DE 7.01 usec  
 TE 318.0 K  
 D1 2.0000000 sec  
 D11 0.0300000 sec  
 TD0 1

CHANNEL f1  
 SFO1 150.9163903 MHz  
 NUC1  $^{13}\text{C}$   
 P1 11.90 usec  
 PLW1 115.09999847 W

CHANNEL f2  
 SFO2 600.1324005 MHz  
 NUC2  $^1\text{H}$   
 CPDPRG2 bi\_waltz65\_256  
 PCPD2 70.00 usec  
 PLW2 16.5960067 W  
 PLW12 0.52078003 W  
 PLW13 0.25518000 W

F2 - Processing parameters  
 SI 32768  
 SF 150.9028090 MHz  
 WDW EM  
 SSB 0  
 LB 1.00 Hz  
 GB 0  
 PC 1.40

# Supporting Information

## 5.1 CYC: $^1\text{H}$ - $^{13}\text{C}$ HSQC NMR and $^1\text{H}$ - $^{13}\text{C}$ HMBC NMR

5.1 CYC FREE - D2O - HSQC

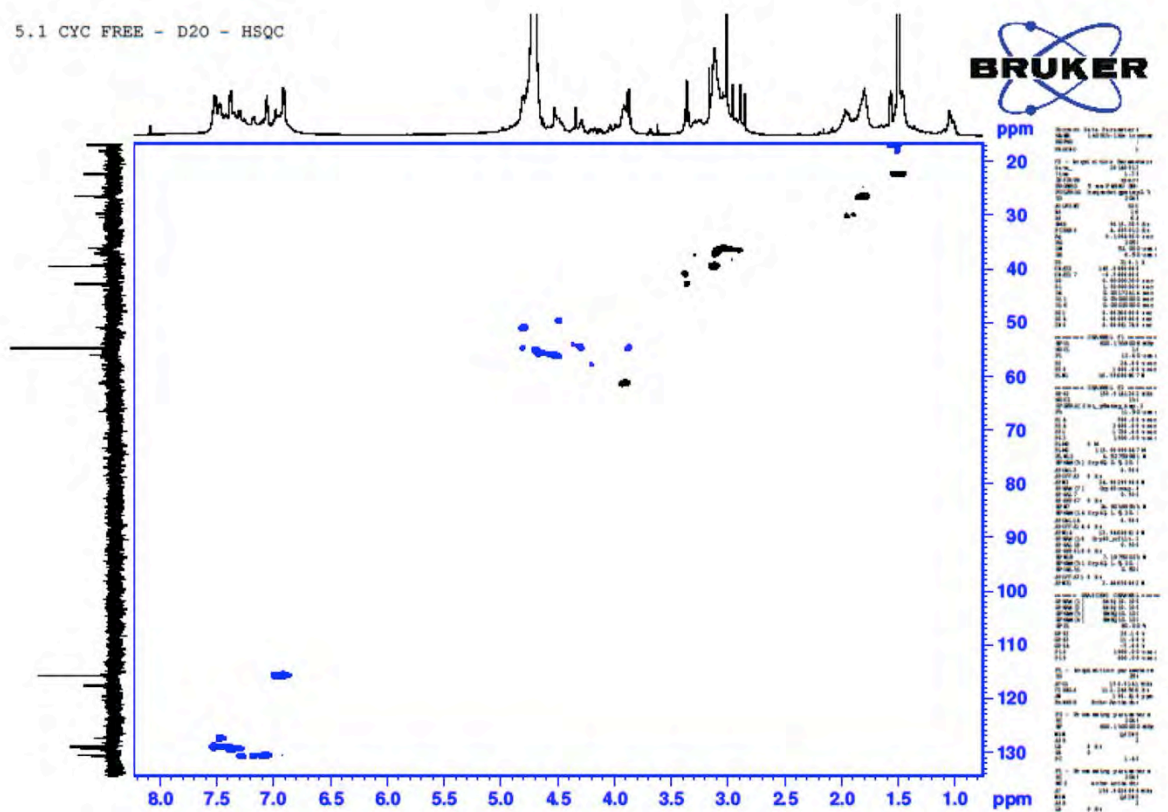

5.1 CYC FREE - D2O - HMBC

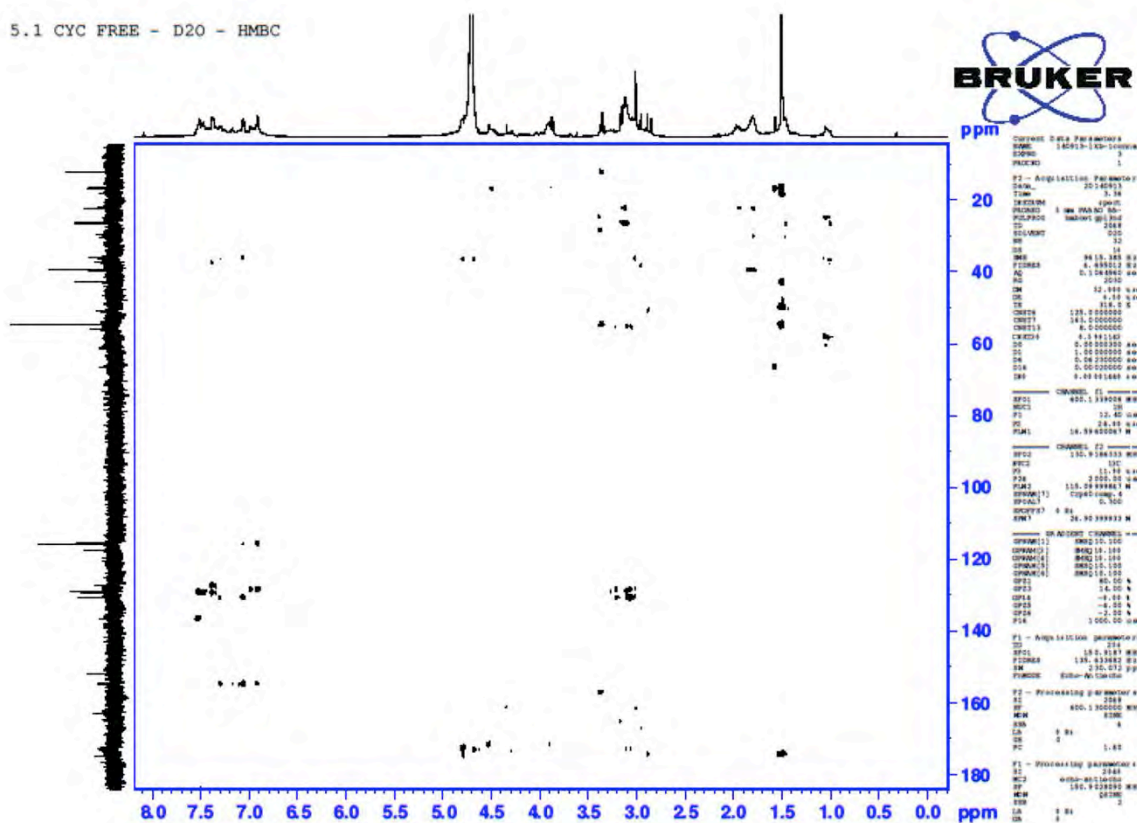

# Supporting Information

## 5.1 CYC: $^1\text{H}$ - $^1\text{H}$ COSY NMR and HRMS

5.1 CYC FREE - D2O - COSY

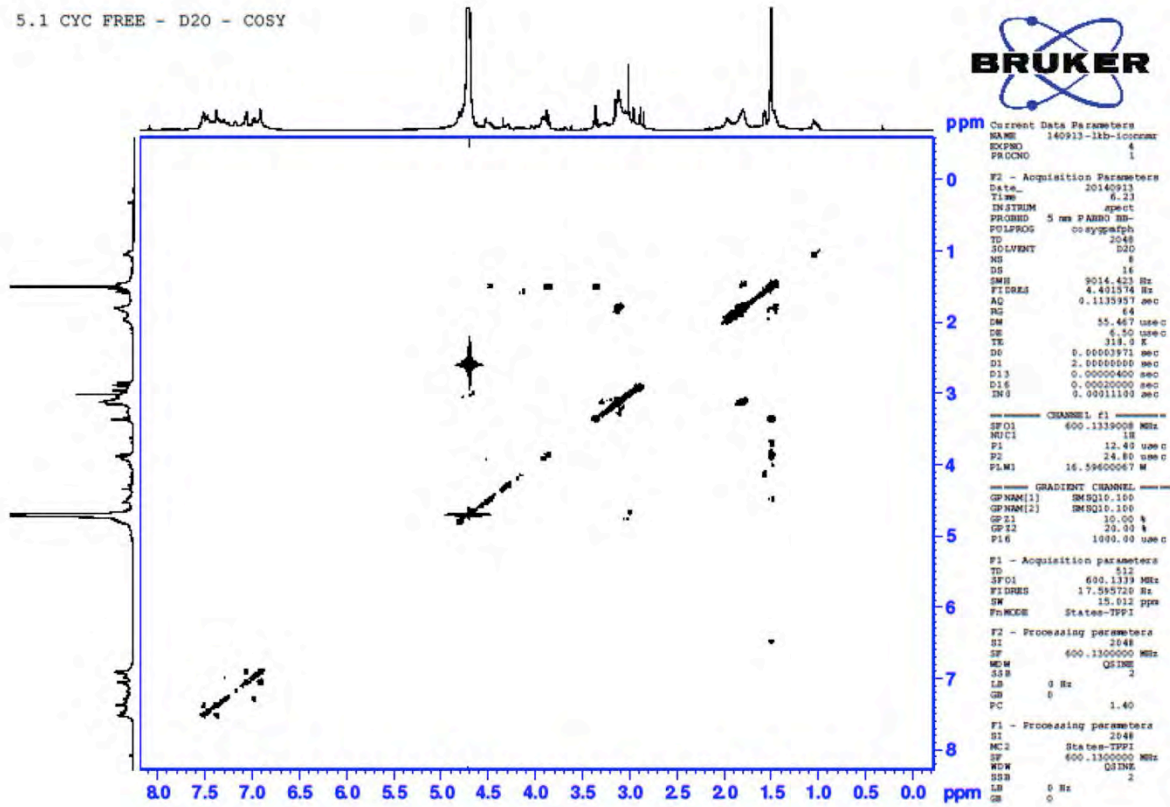

L-2\_Pos\_Full\_a #1 RT: 0.02 AV: 1 NL: 1.48E7  
 T: FTMS + c NSI Full ms [50.00-2000.00]

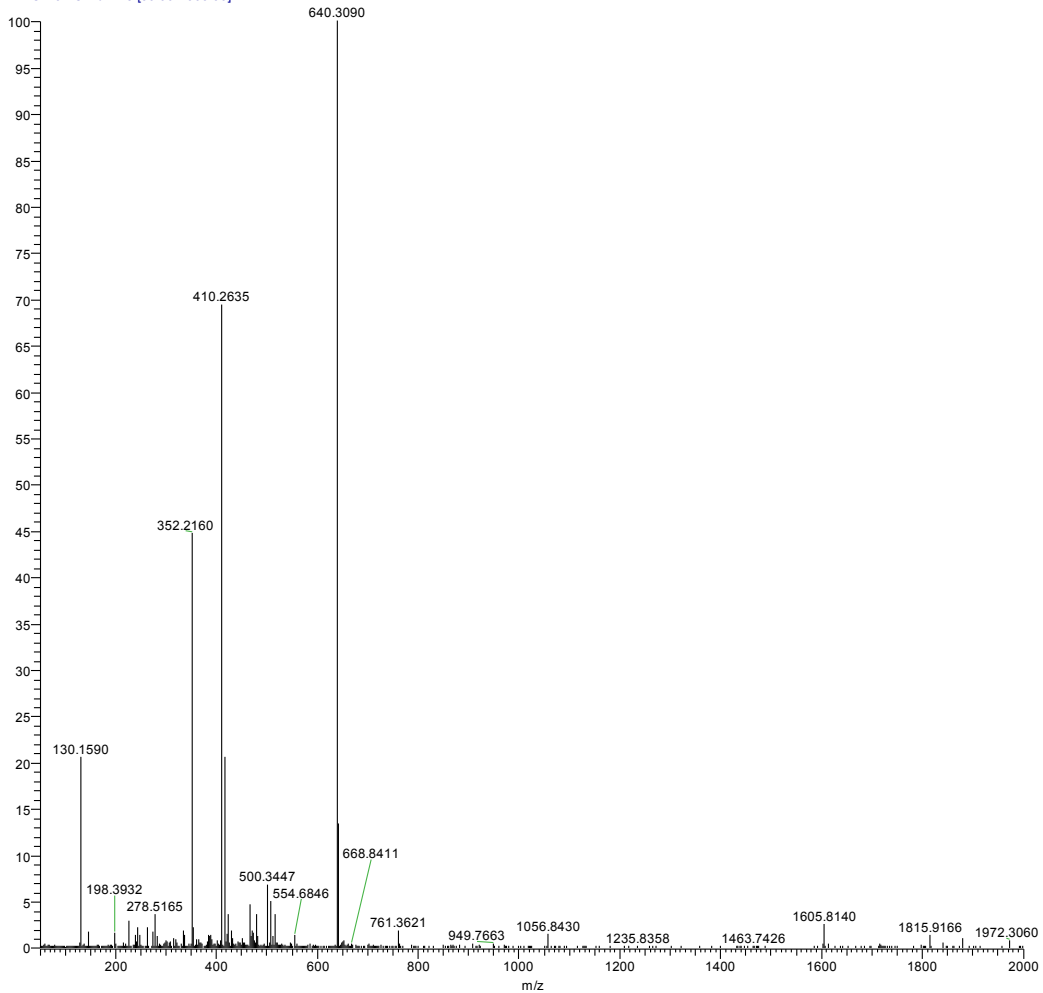



Supporting Information

5.1 CYC: LC/MS

==== Shimadzu LCMSsolution Analysis Report ====

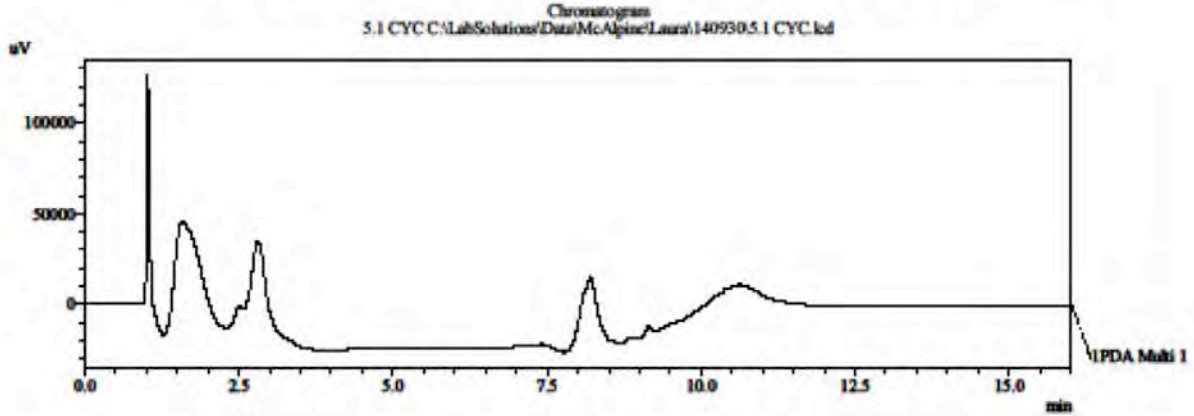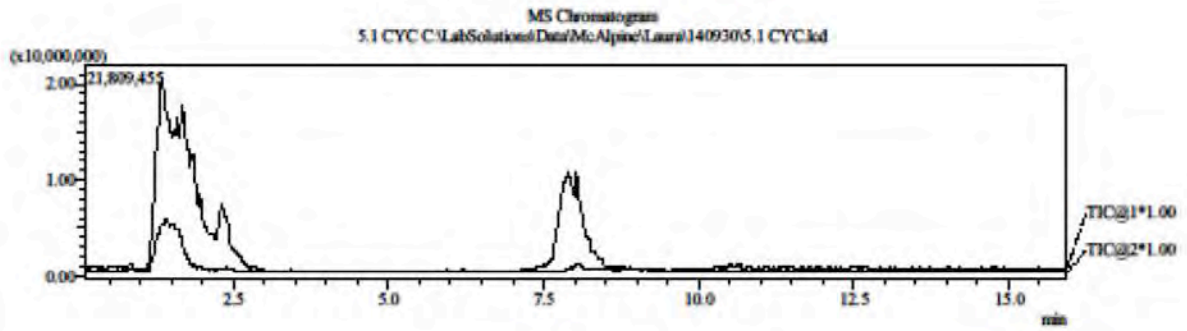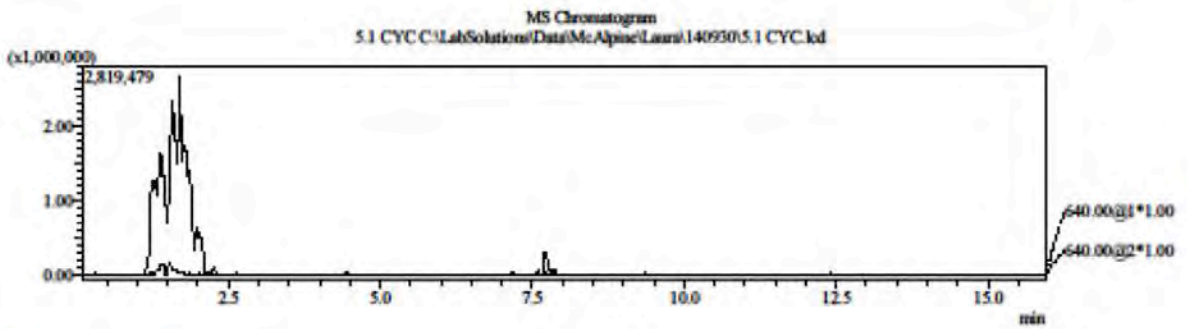

MS Spectrum Graph

#1 Ret.Time:Single 1.400(Scan#79)  
BG Mode:None  
Mass Peaks:1444 Base Peak:640.20(1603544) Polarity:Pos Segment1 - Event1

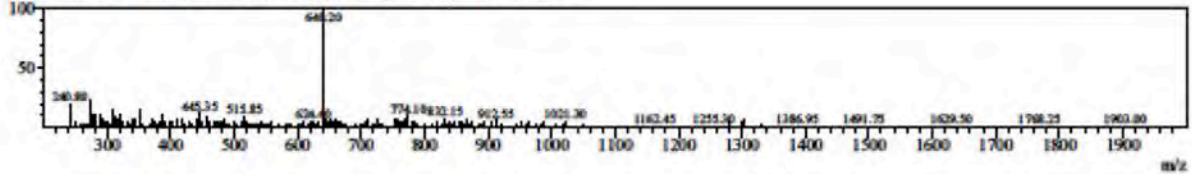

MS Spectrum Graph

#2 Ret.Time:Single 1.417(Scan#80)  
BG Mode:None  
Mass Peaks:1399 Base Peak:637.75(1095982) Polarity:Neg Segment1 - Event2

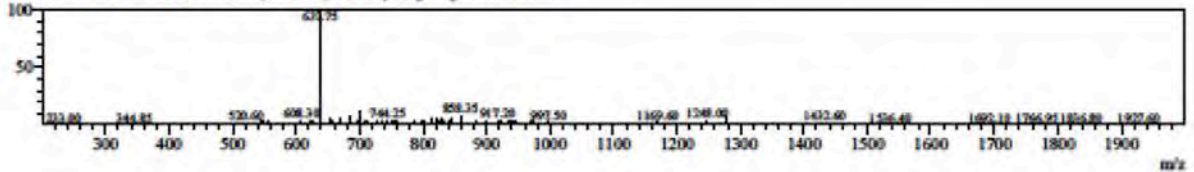

## Supporting Information

### 6.1 LIN: <sup>1</sup>H NMR and <sup>13</sup>C NMR

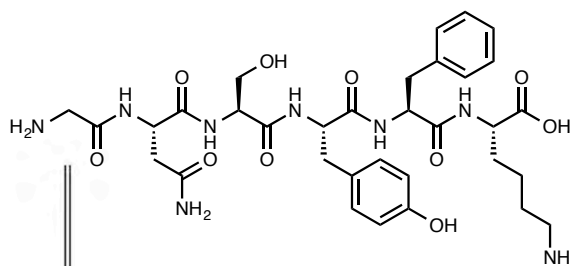

6.1 LIN FREE - D2O - 1H

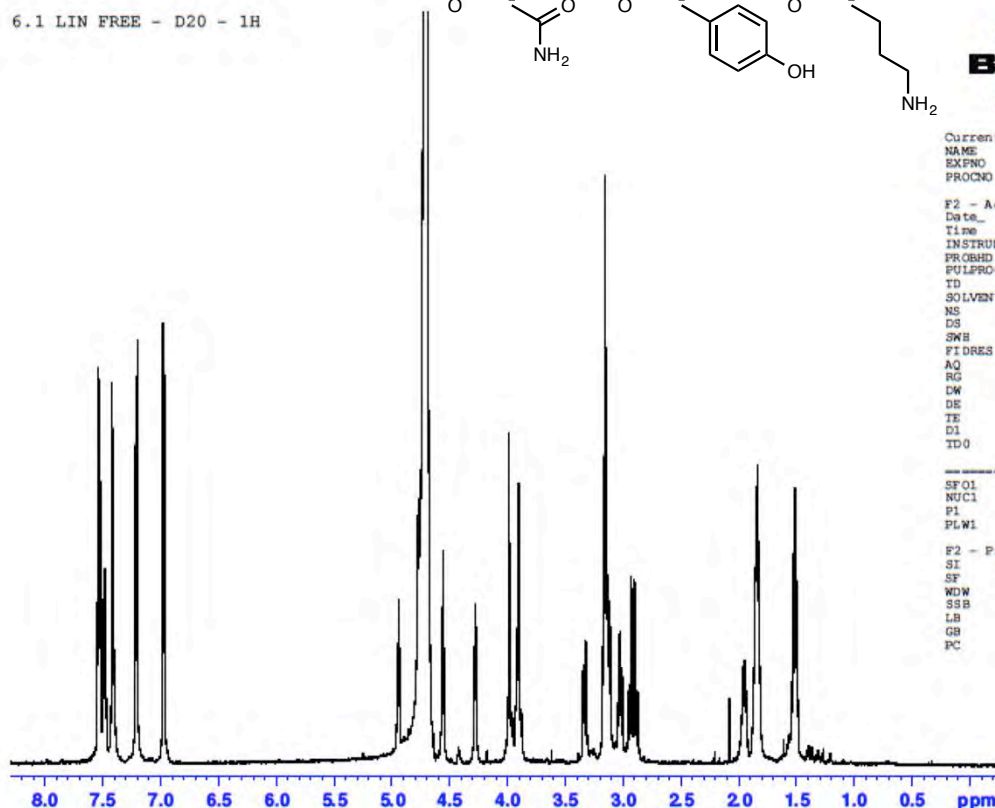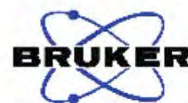

```

Current Data Parameters
NAME      140927-lkb
EXPNO    2
PROCNO   1

F2 - Acquisition Parameters
Date_    20140927
Time     17.47
INSTRUM  spect
PROBHD   5 mm PABBO BB-
PULPROG  zg
TD        65536
SOLVENT  D2O
NS        32
DS        0
SWH       9009.009 Hz
FIDRES    0.137467 Hz
AQ        3.6372480 sec
RG        80.6
DW        55.500 usec
DE        9.61 usec
TE        318.1 K
D1        5.00000000 sec
TD0       1

----- CHANNEL f1 -----
SF01     600.1339008 MHz
NUC1     1H
P1       12.40 usec
PLW1     16.59600067 W

F2 - Processing parameters
SI       131.072
SF       600.1300000 MHz
WDW      EM
SSB      0
LB       0.30 Hz
GB       0
PC       1.00
    
```

6.1 LIN FREE - D2O - 13C

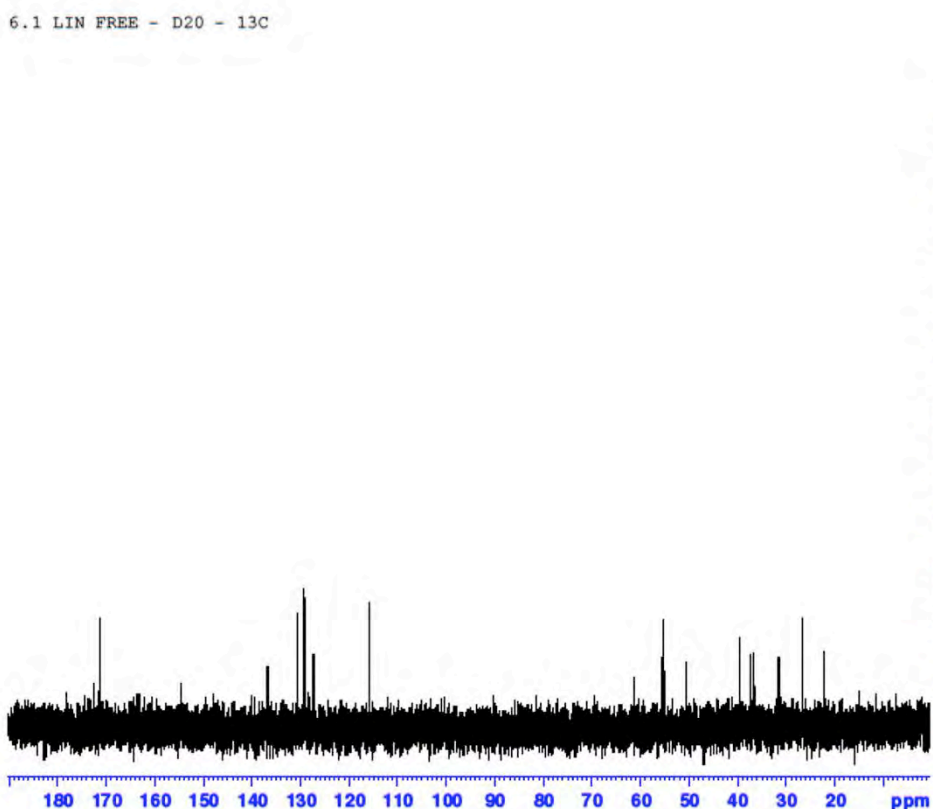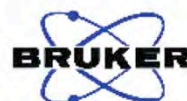

```

Current Data Parameters
NAME      140927-lkb
EXPNO    3
PROCNO   1

F2 - Acquisition Parameters
Date_    20140927
Time     18.05
INSTRUM  spect
PROBHD   5 mm PABBO BB-
PULPROG  zgpg30
TD        65536
SOLVENT  D2O
NS        5120
DS        4
SWH       30241.936 Hz
FIDRES    0.461455 Hz
AQ        1.0835285 sec
RG        2050
DW        16.533 usec
DE        7.01 usec
TE        318.1 K
D1        2.00000000 sec
D11       0.03000000 sec
TD0       1

----- CHANNEL f1 -----
SF01     150.9163903 MHz
NUC1     13C
P1       11.90 usec
PLW1     115.09999847 W

----- CHANNEL f2 -----
SF02     600.1324005 MHz
NUC2     1H
PCPRG2  bi_waltz65_256
PCPD2   75.00 usec
PLW2     16.59600067 W
PLW12    0.52078003 W
PLW13    0.25518000 W

F2 - Processing parameters
SI       32.768
SF       150.9028090 MHz
WDW      EM
SSB      0
LB       1.00 Hz
GB       0
PC       1.00
    
```

# Supporting Information

## 6.1 LIN: $^1\text{H}$ - $^{13}\text{C}$ HSQC NMR and $^1\text{H}$ - $^{13}\text{C}$ HMBC NMR

6.1 LIN FREE - D2O - HSQC

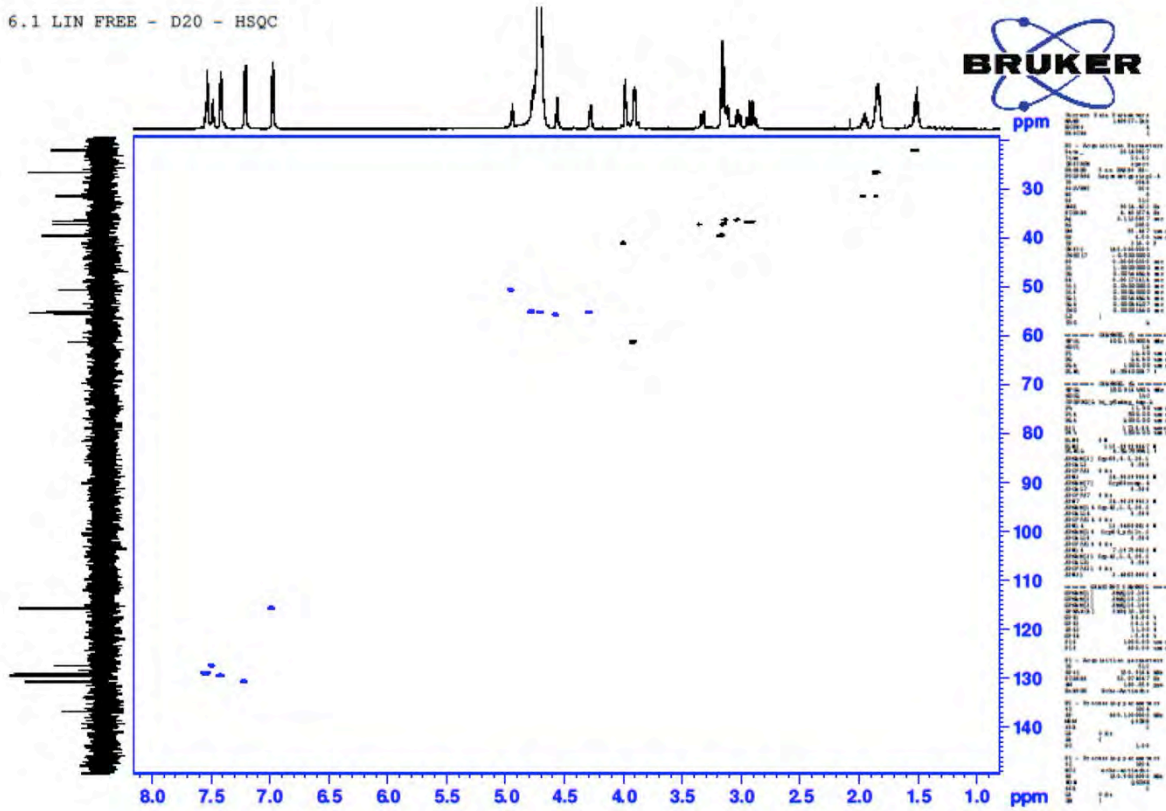

6.1 LIN FREE - D2O - HMBC

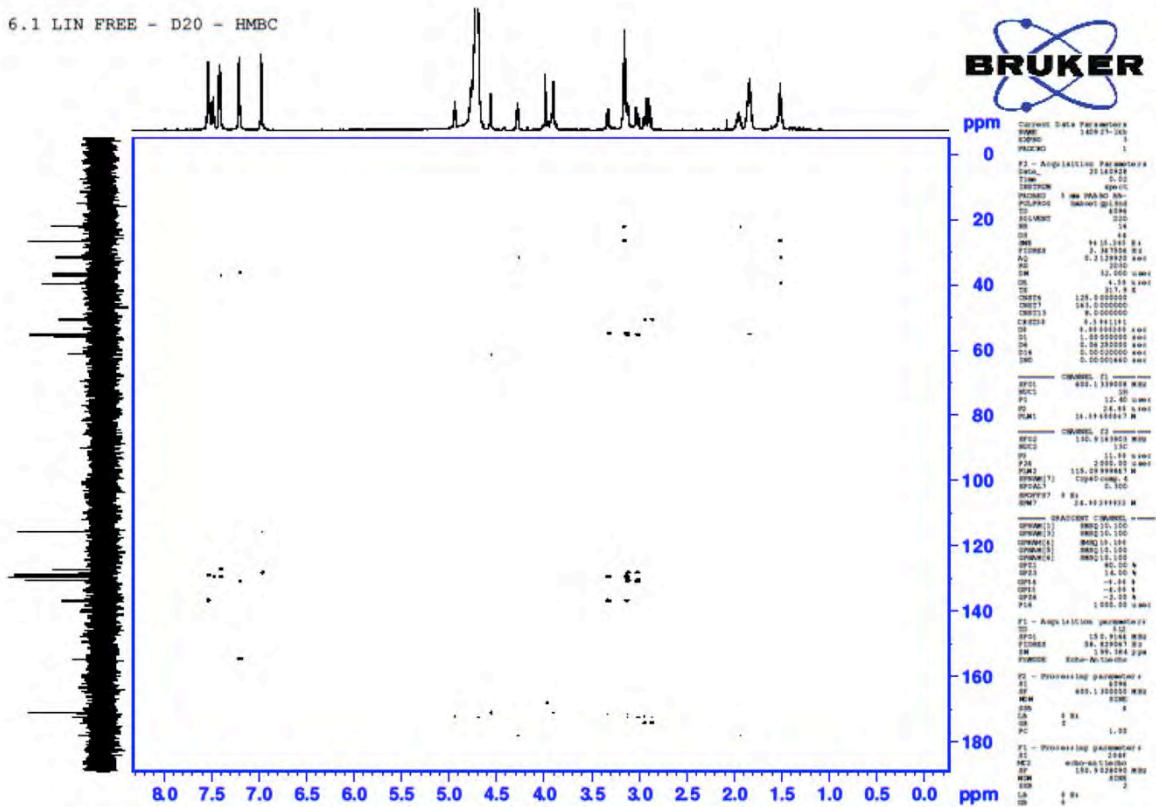

# Supporting Information

## 6.1 LIN: $^1\text{H}$ - $^1\text{H}$ COSY NMR and HRMS

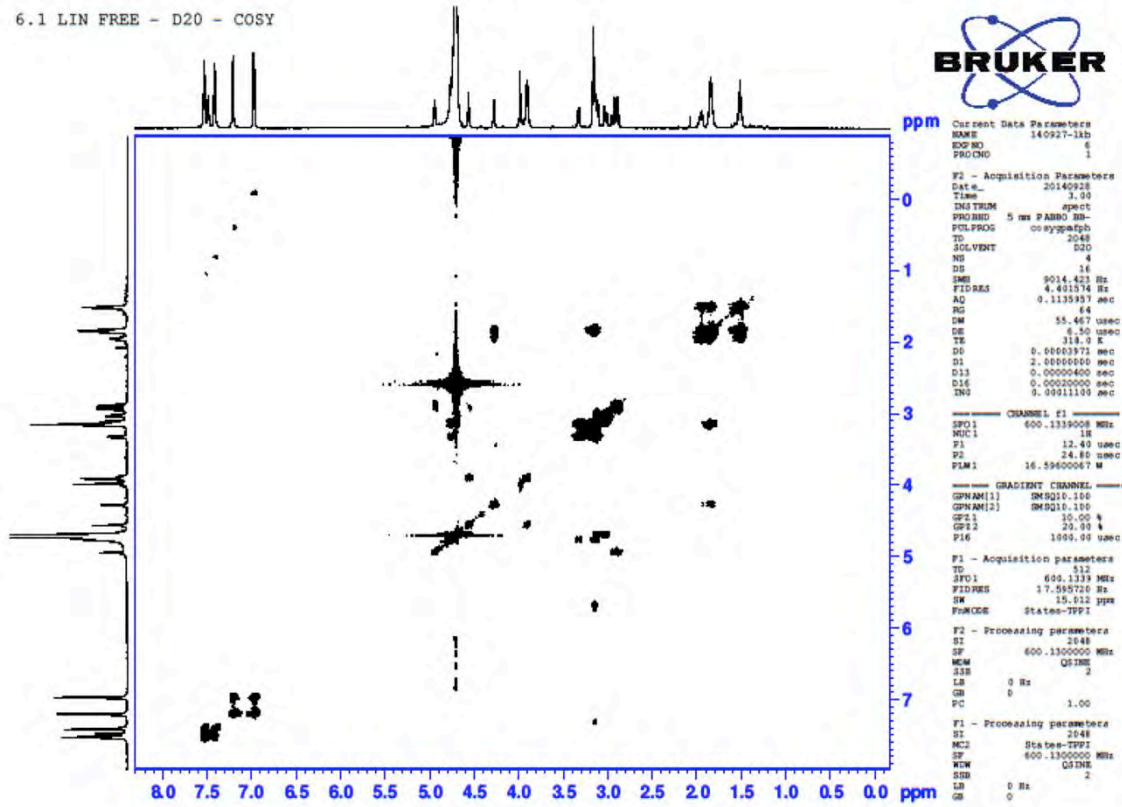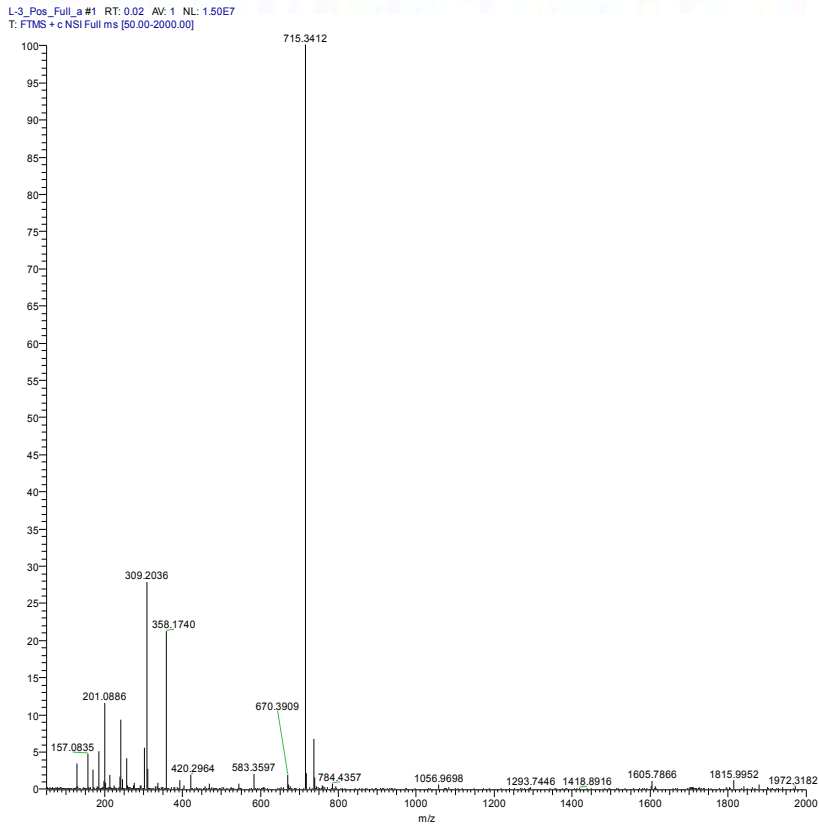

Supporting Information

6.1 LIN: LC/MS

==== Shimadzu LCMSsolution Analysis Report ====

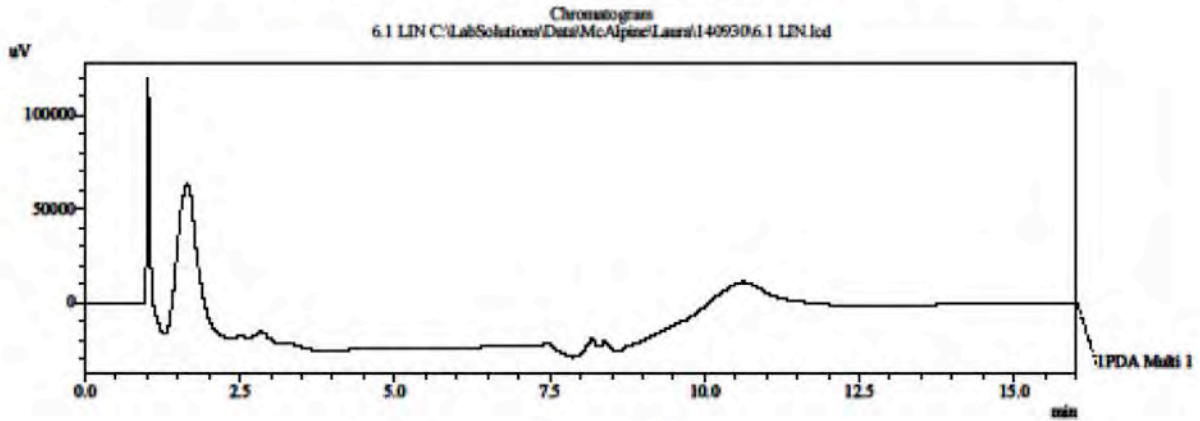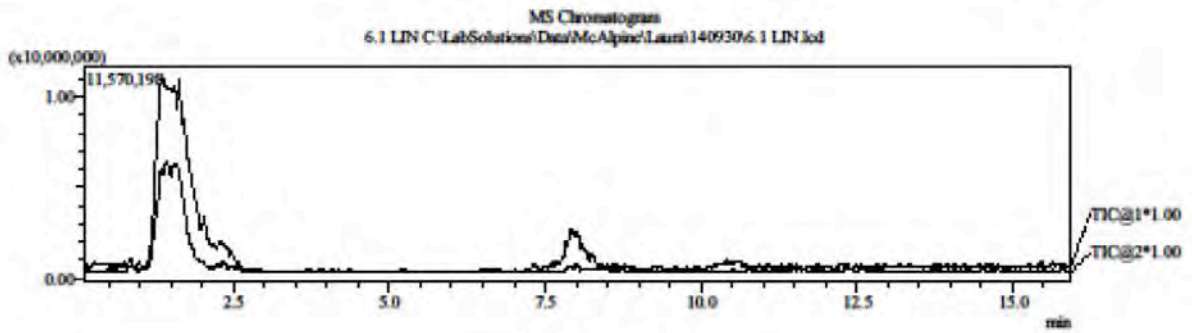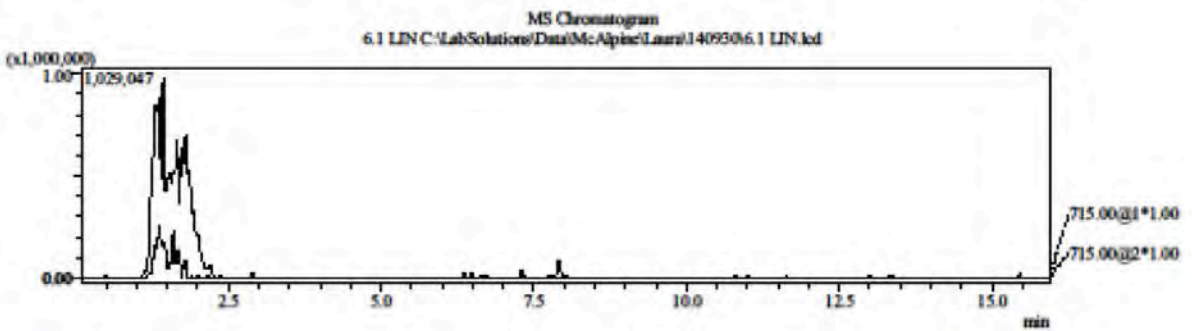

MS Spectrum Graph

#1 Ret.Time:Single 1.433(Scan#81)

BG Mode:None

Mass Peak:1381 Base Peak:357.95(1799282) Polarity:Pos Segment1 - Event1

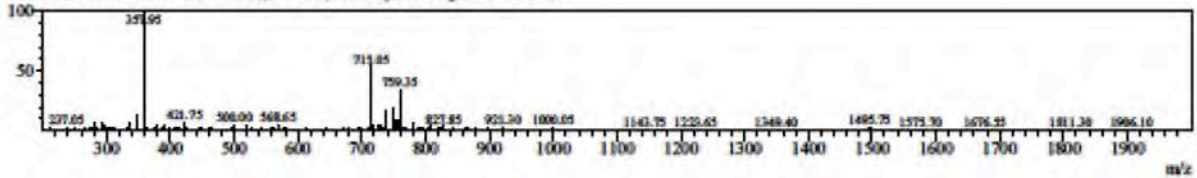

MS Spectrum Graph

#2 Ret.Time:Single 1.450(Scan#82)

BG Mode:None

Mass Peak:1371 Base Peak:712.75(1422035) Polarity:Neg Segment1 - Event2

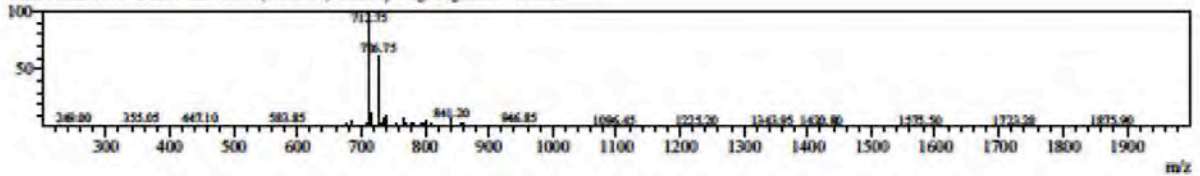

Supporting Information

6.1 CYC: <sup>1</sup>H NMR and <sup>13</sup>C NMR

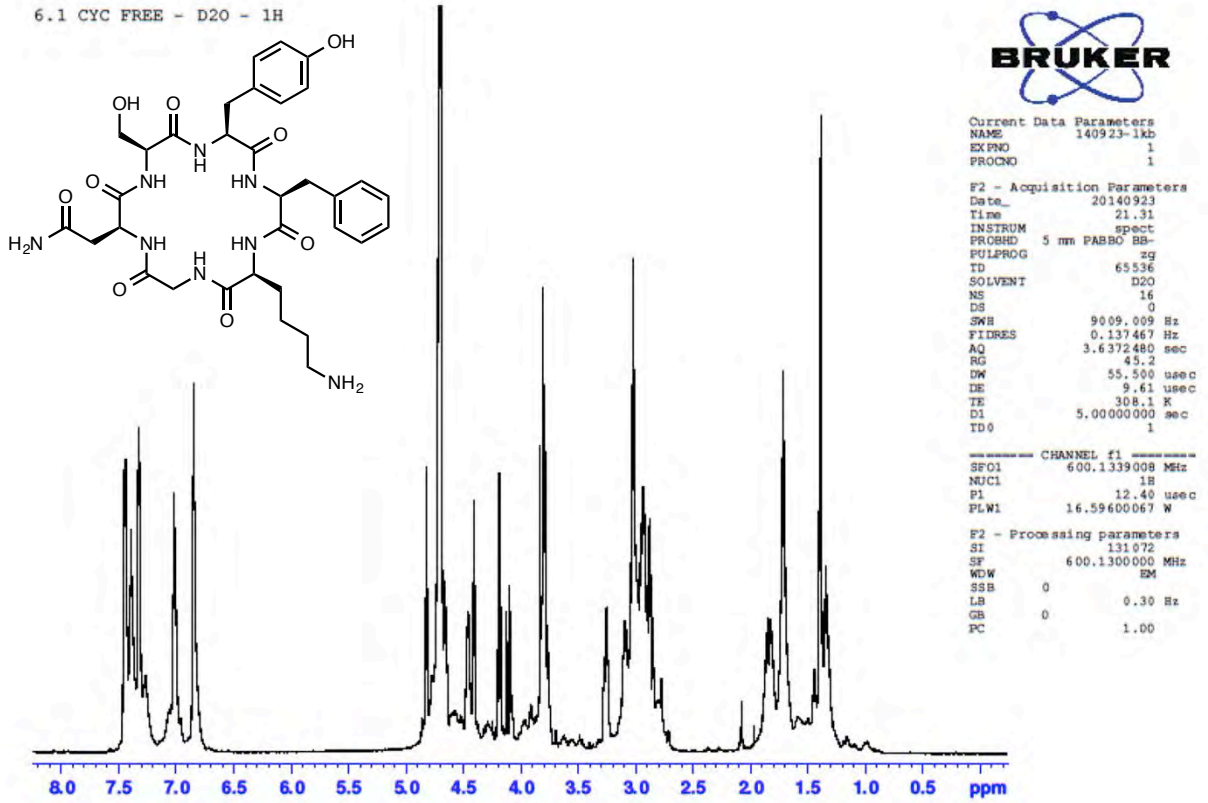

6.1 CYC FREE - D2O - 13C

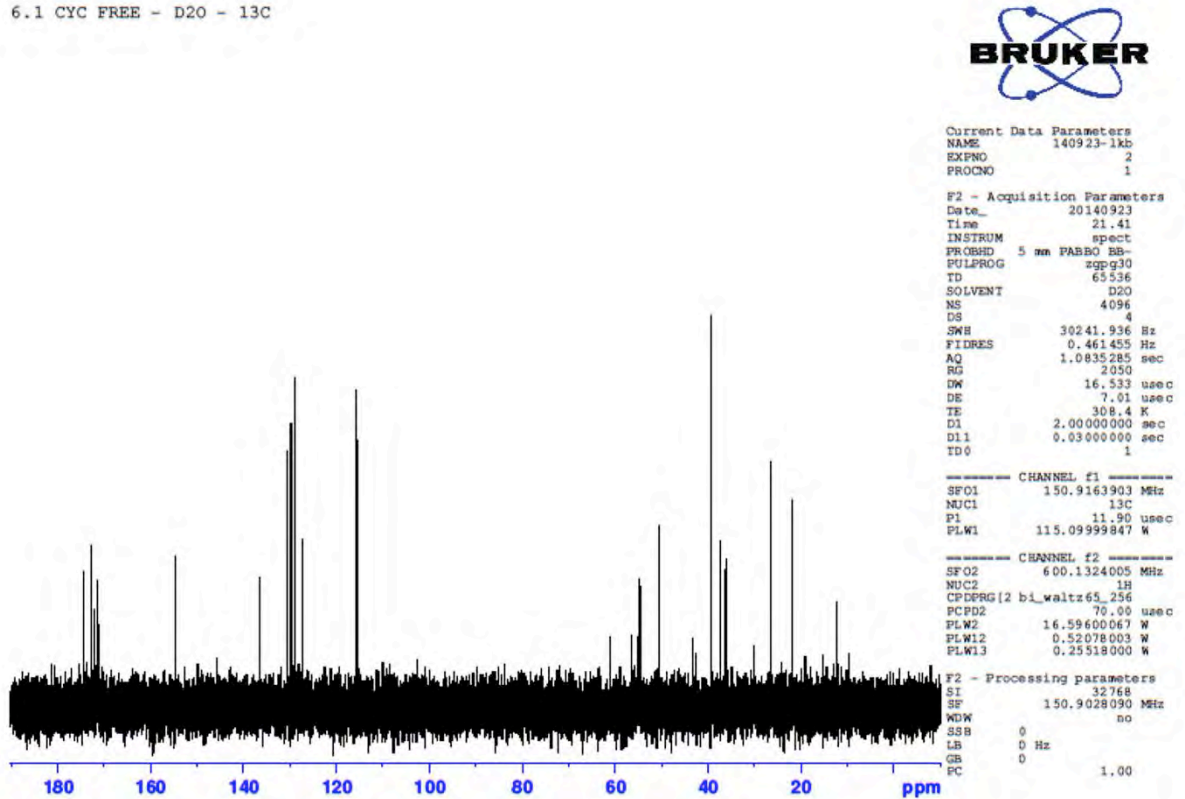

# Supporting Information

## 6.1 CYC: $^1\text{H}$ - $^{13}\text{C}$ HSQC NMR and $^1\text{H}$ - $^{13}\text{C}$ HMBC NMR

6.1 CYC FREE - D2O - HSQC

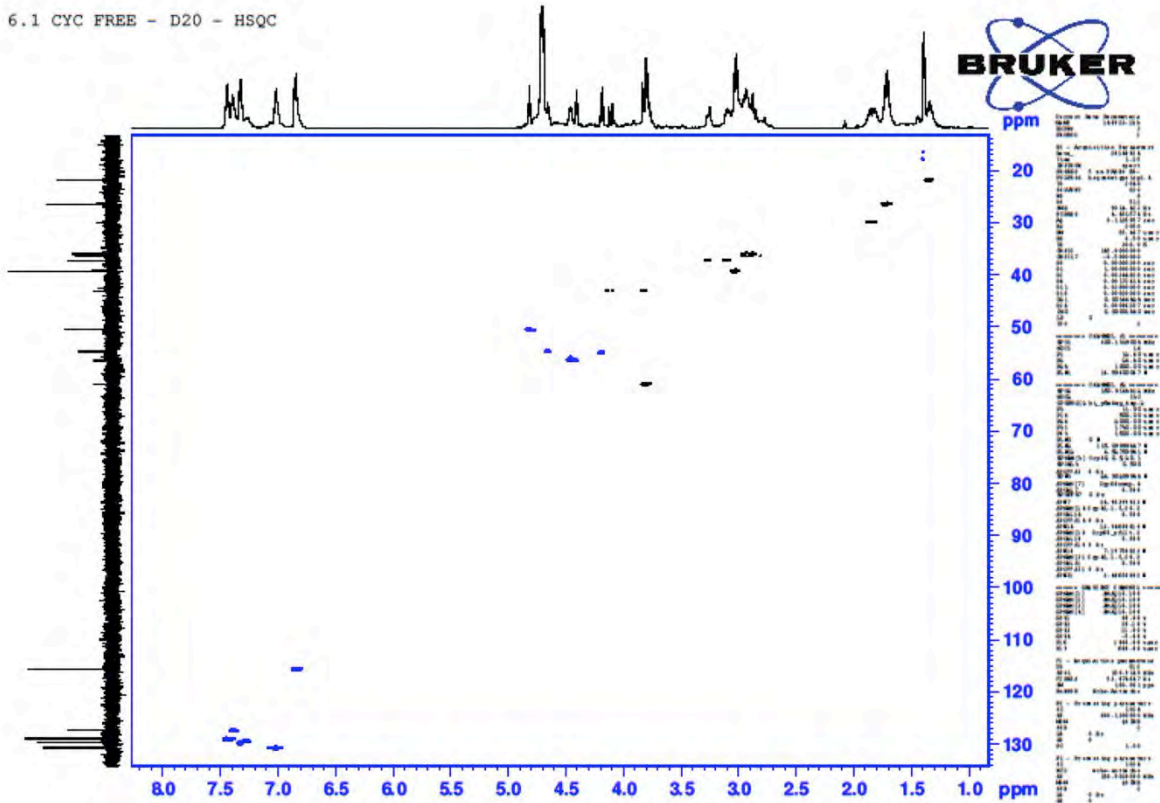

6.1 CYC FREE - D2O - HMBC

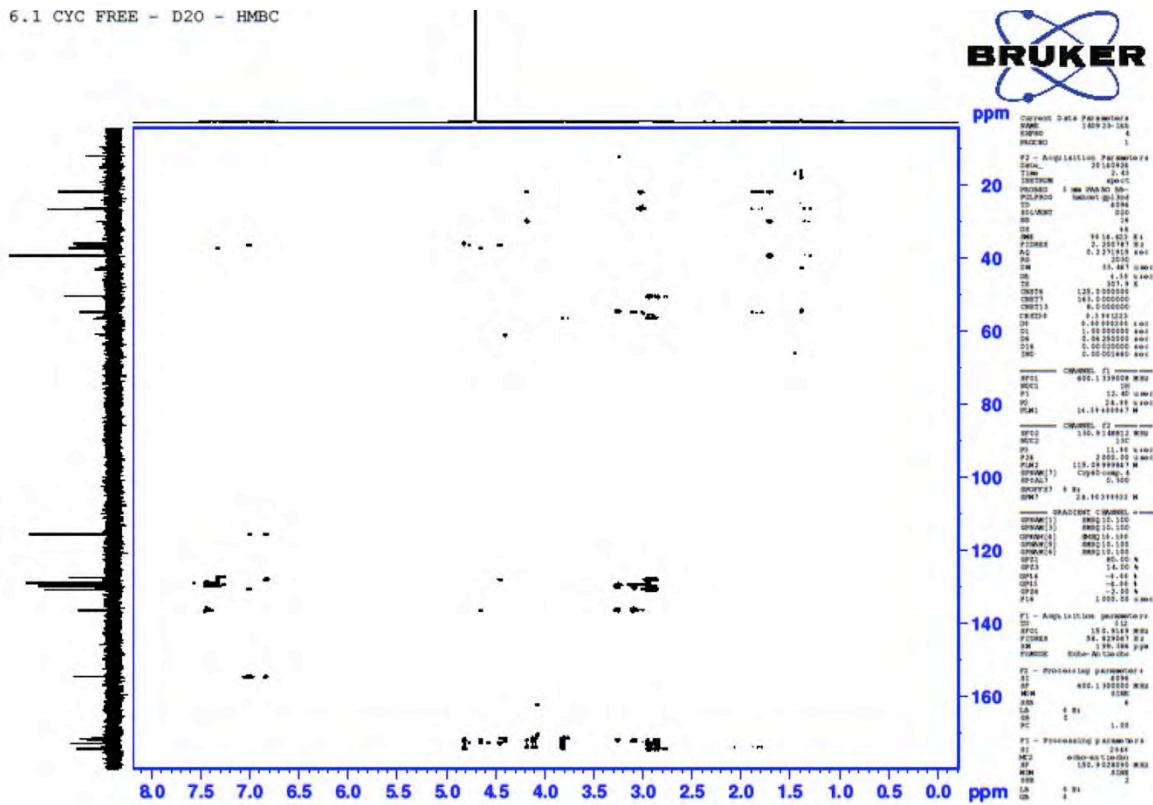

# Supporting Information

## 6.1 CYC: $^1\text{H}$ - $^1\text{H}$ COSY NMR and HRMS

6.1 CYC FREE - D2O - COSY

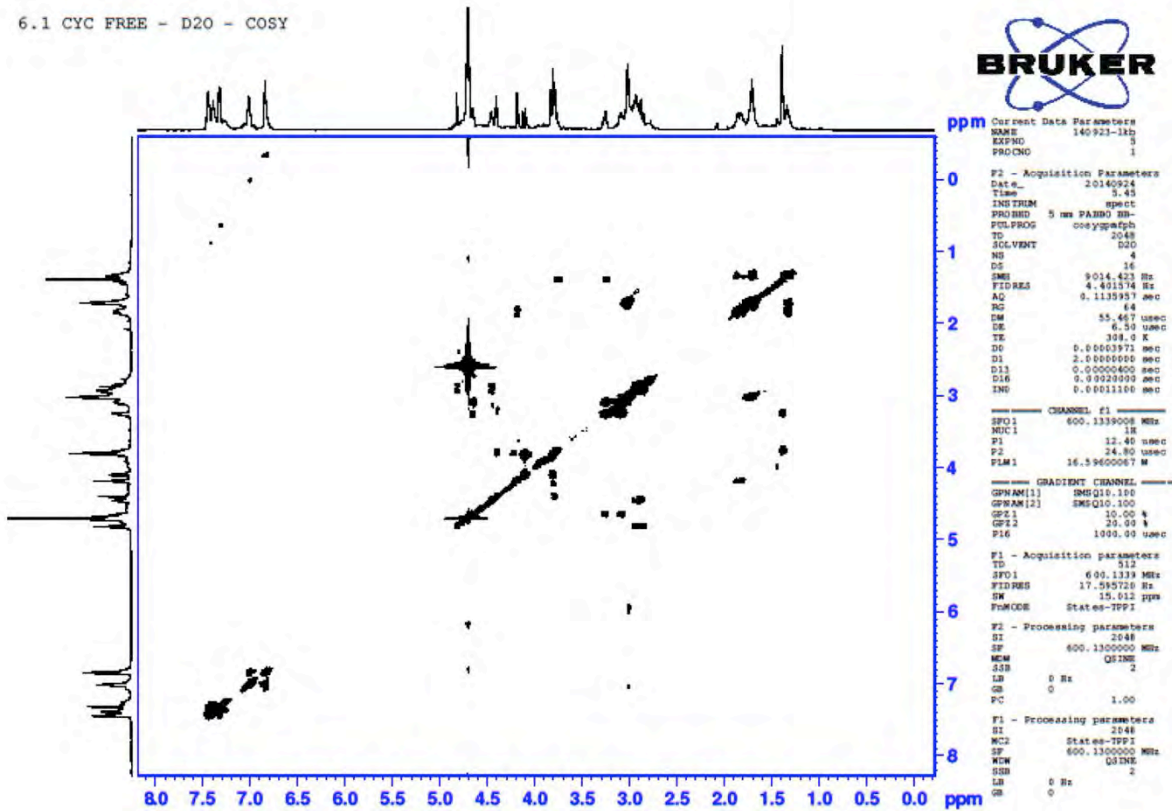

L-4\_Pos\_Full#1 RT: 0.02 AV: 1 NL: 7.06E7  
 T: FTMS + c NSI Full ms [50.00-2000.00]

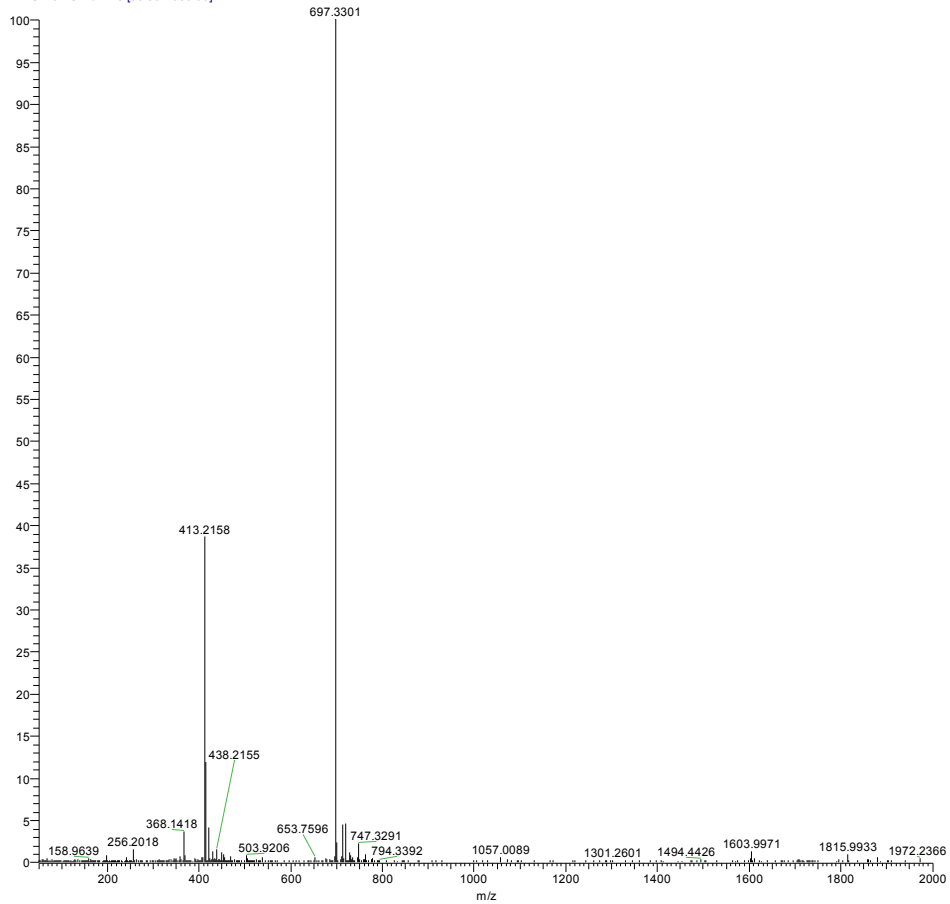



Supporting Information

6.1 CYC: LC/MS

==== Shimadzu LCMSSolution Analysis Report ====

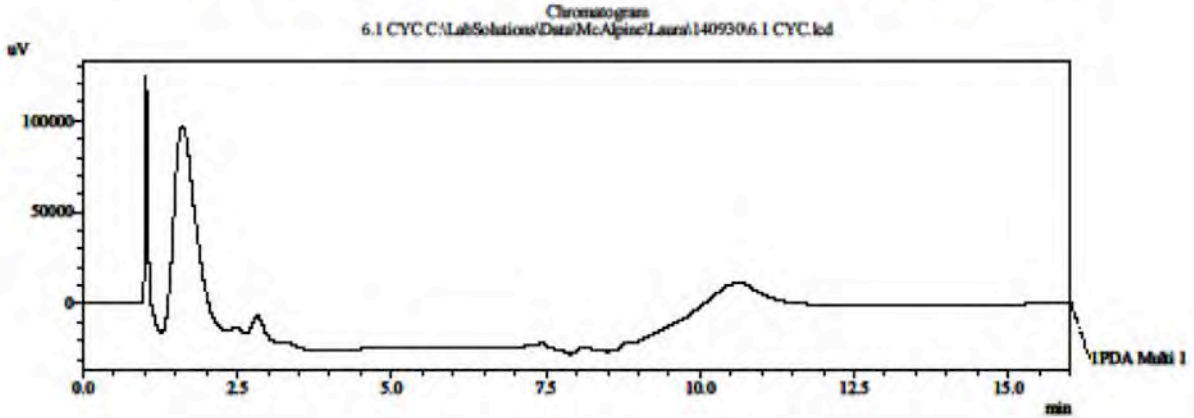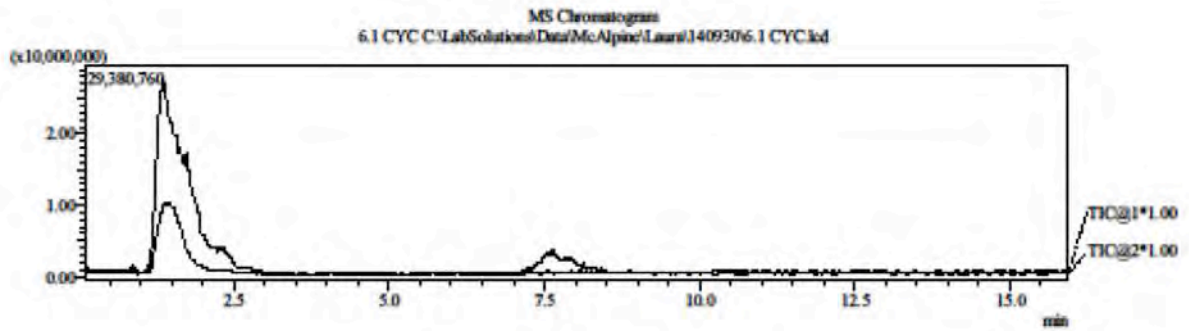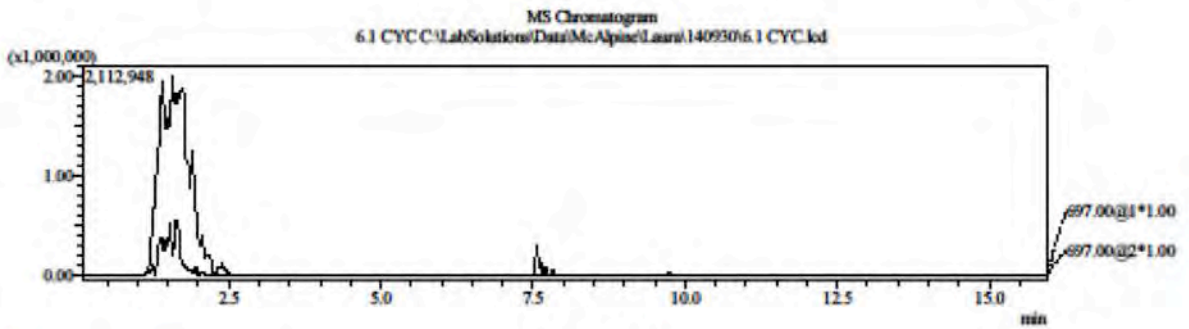

MS Spectrum Graph

#1 Ret. Time: Single 1.367(Scan#:77)  
BG Mode:None  
Mass Peak:1499 Base Peak:696.85(1441060) Polarity:Pos Segment1 - Event1

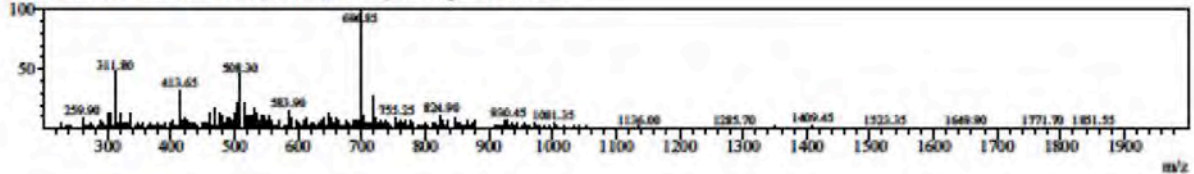

MS Spectrum Graph

#2 Ret. Time: Single 1.383(Scan#:78)  
BG Mode:None  
Mass Peak:1452 Base Peak:694.70(2136140) Polarity:Neg Segment1 - Event2

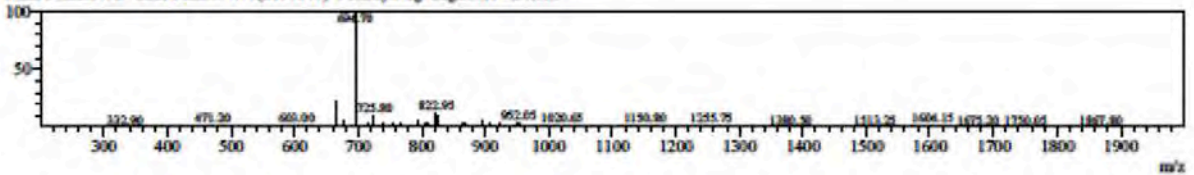

# Supporting Information

## 7.1 LIN: $^1\text{H}$ NMR and $^{13}\text{C}$ NMR

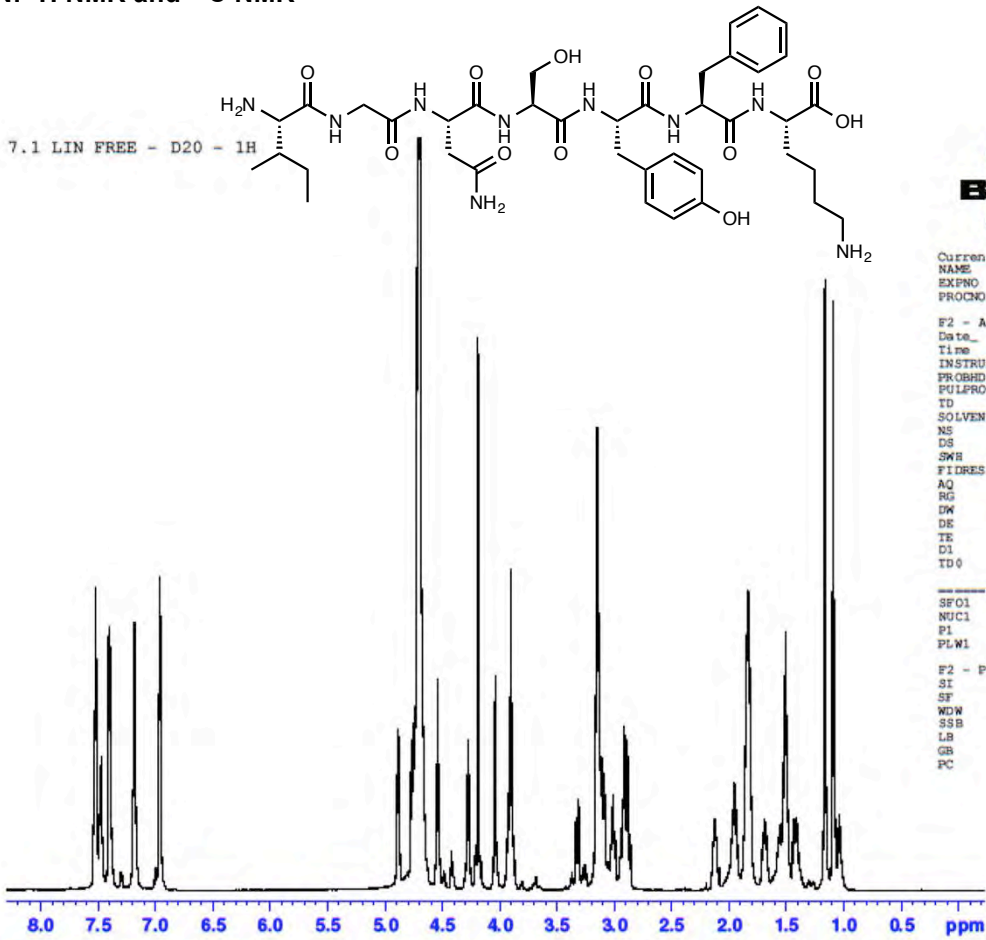

7.1 LIN FREE - D2O - 13C

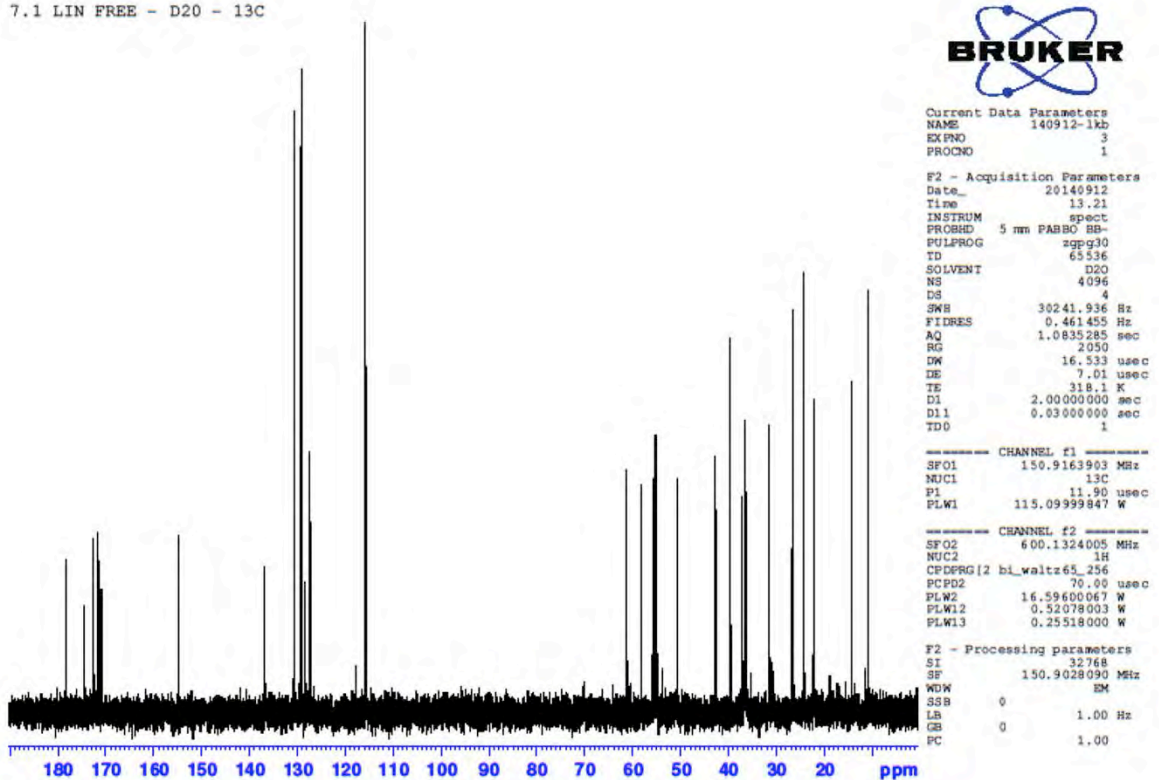

Supporting Information

7.1 LIN:  $^1\text{H}$ - $^{13}\text{C}$  HSQC NMR and  $^1\text{H}$ - $^{13}\text{C}$  HMBC NMR

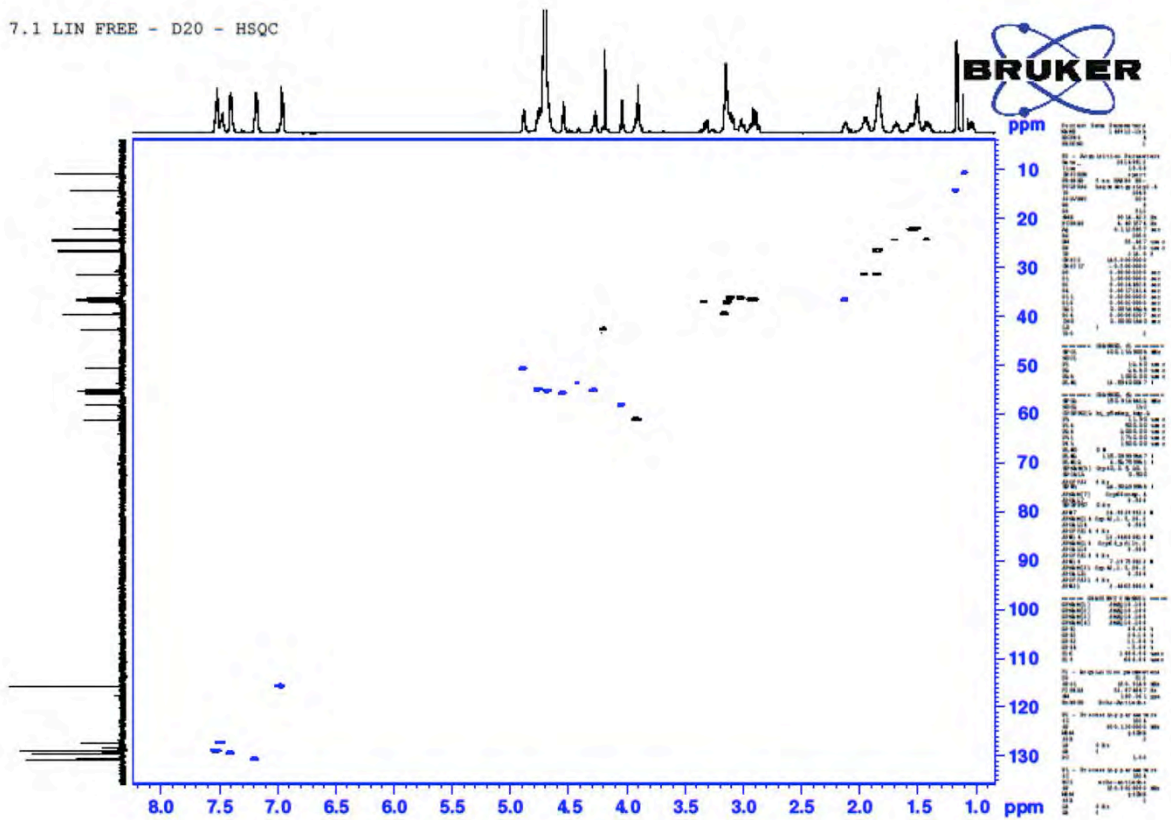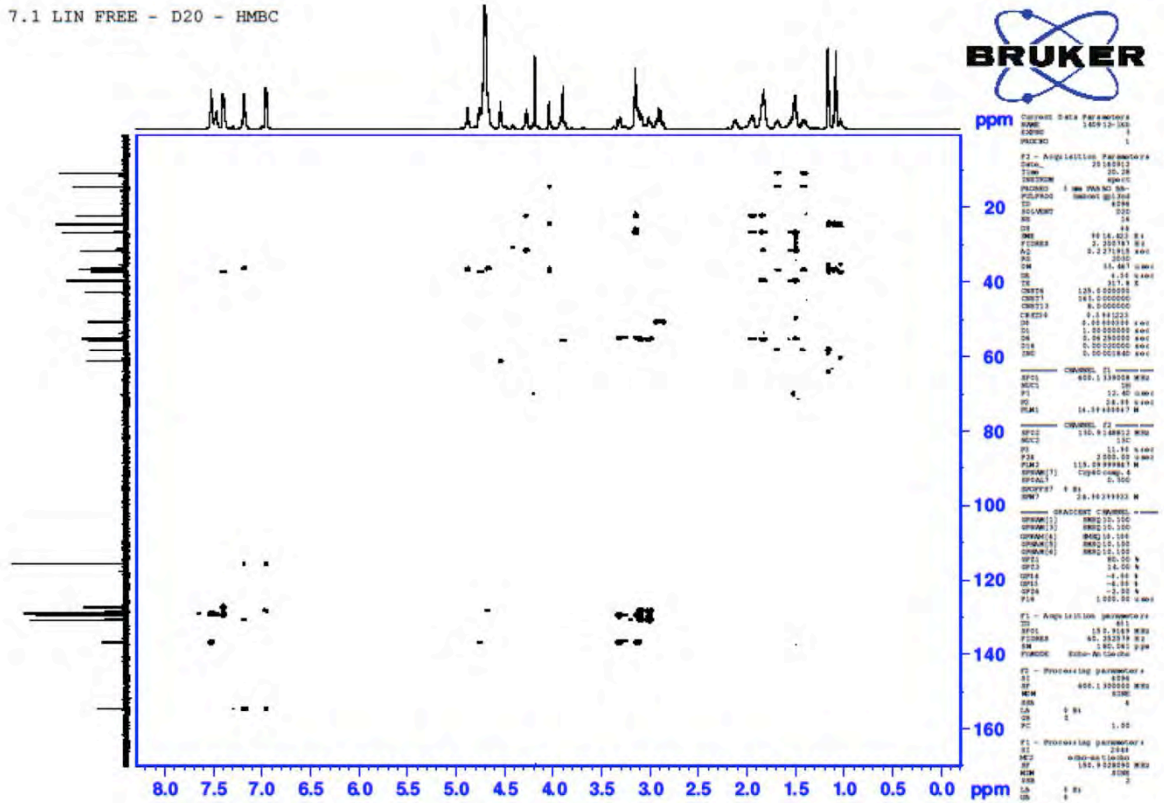

# Supporting Information

## 7.1 LIN: $^1\text{H}$ - $^1\text{H}$ COSY NMR and HRMS

7.1 LIN FREE - D2O - COSY

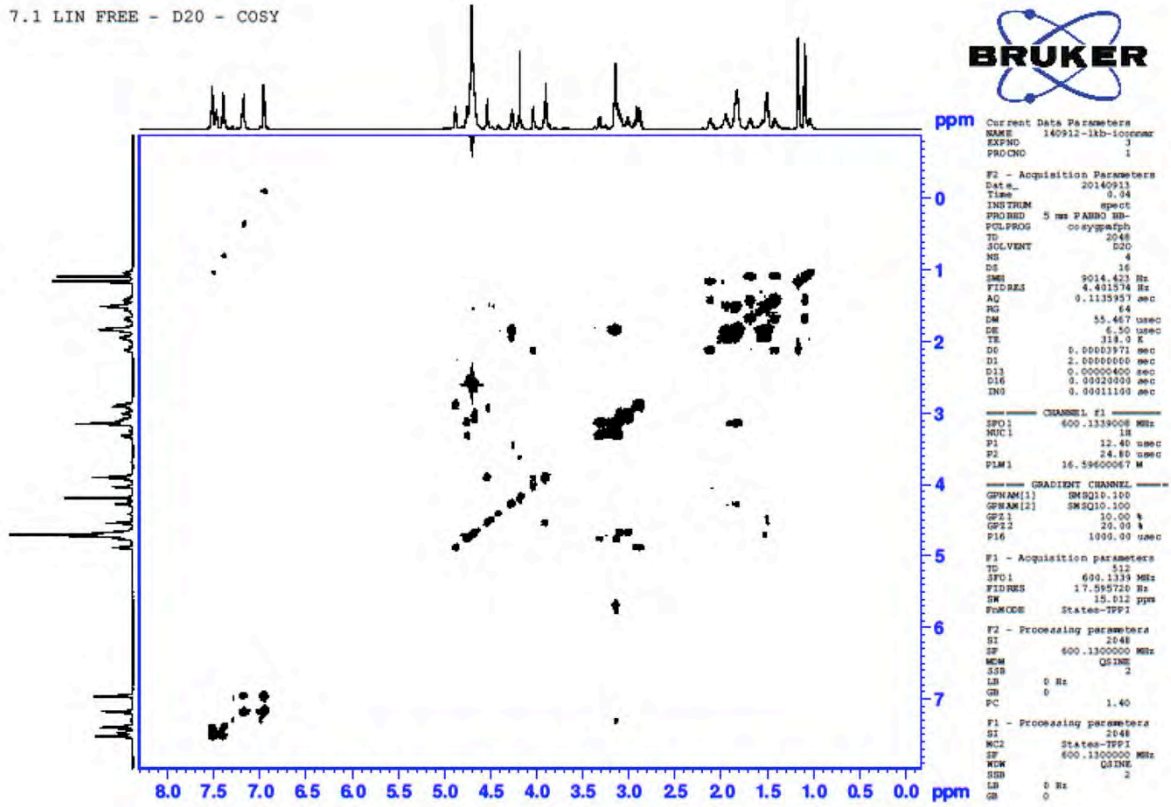

L-5\_Pos\_Full#1 RT: 0.01 AV: 1 NL: 5.67E7  
 T: FTMS + c NSI Full ms [50.00-2000.00]

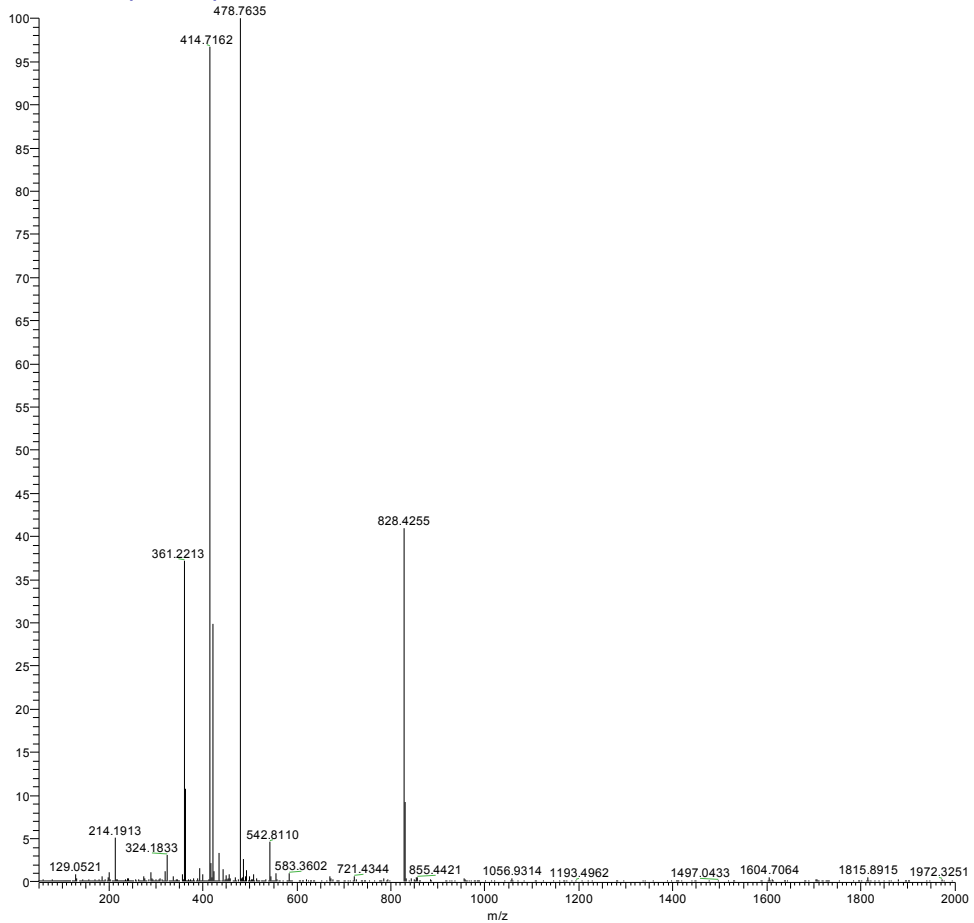

Supporting Information

7.1 LIN: LC/MS

==== Shimadzu LCMSsolution Analysis Report ====

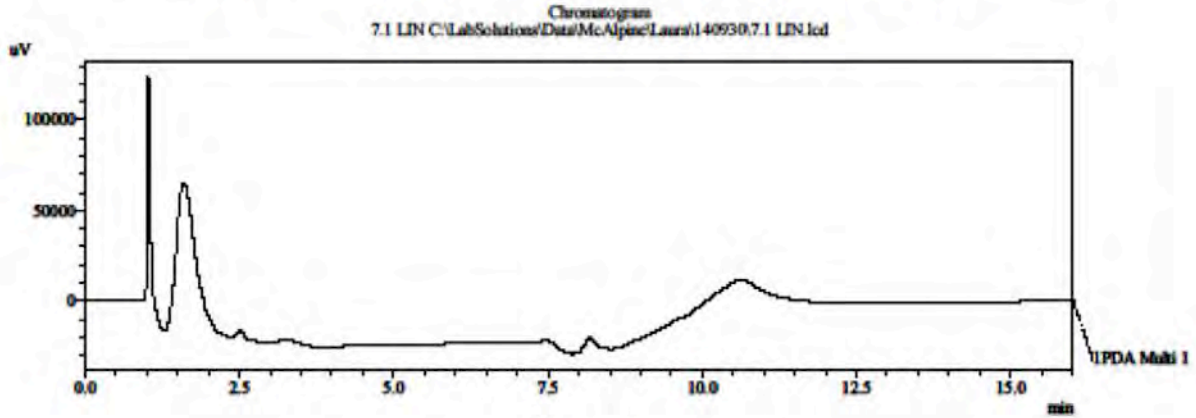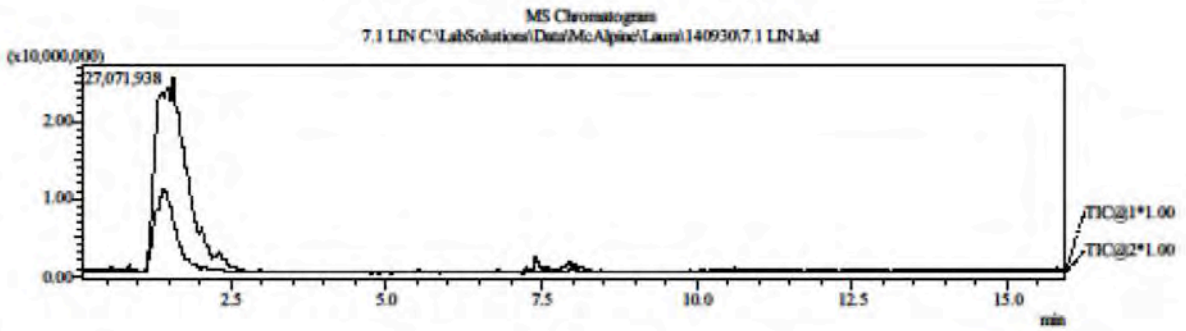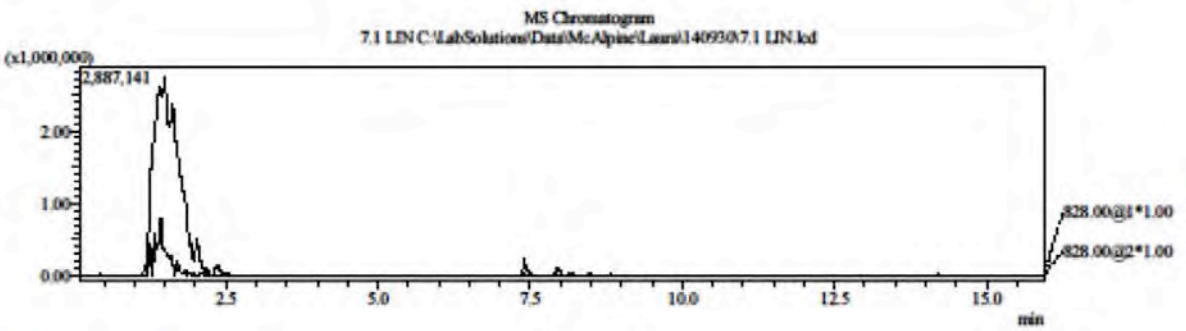

MS Spectrum Graph

#1 Ret.Time:Single 1.467(Scan#83)  
BG Mode:None  
Mass Peaks:1461 Base Peak:414.55(5600904) Polarity:Pos Segment1 - Event1

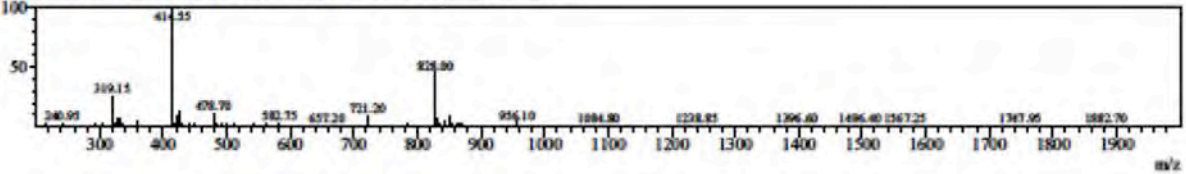

MS Spectrum Graph

#2 Ret.Time:Single 1.483(Scan#84)  
BG Mode:None  
Mass Peaks:1442 Base Peak:825.85(4902102) Polarity:Neg Segment1 - Event2

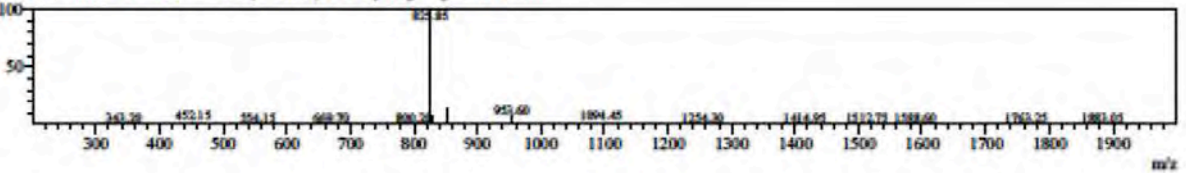

# Supporting Information

## 7.1 CYC: <sup>1</sup>H NMR and <sup>13</sup>C NMR

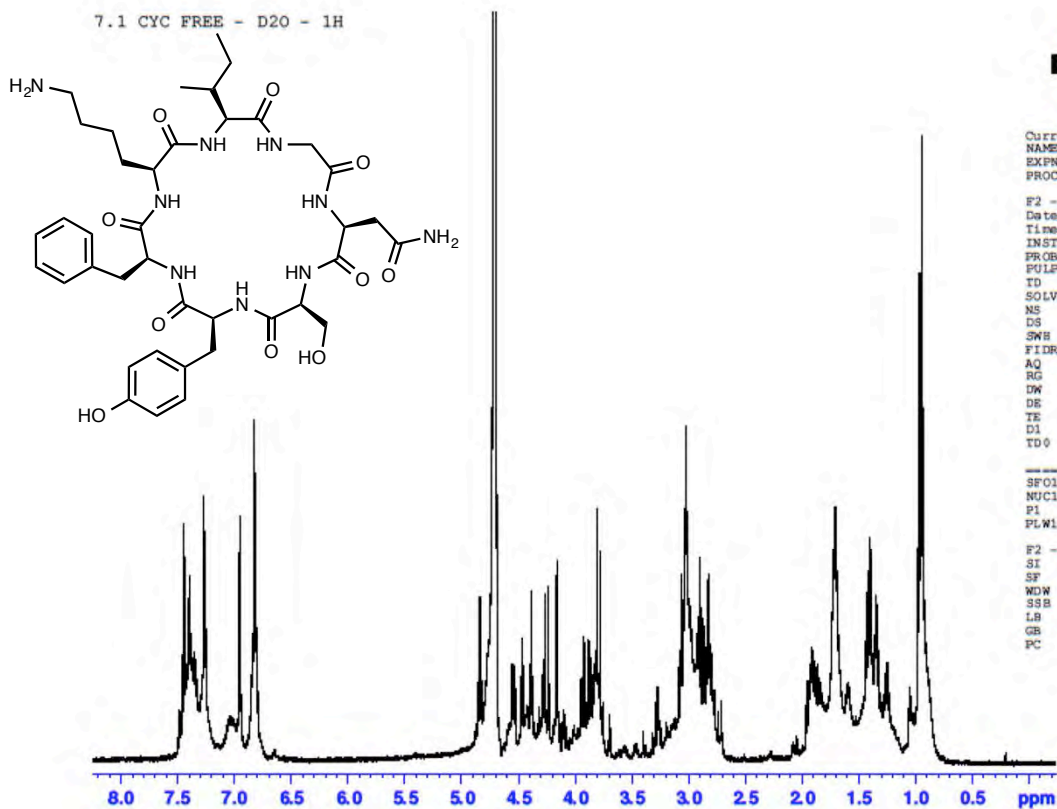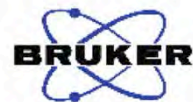

Current Data Parameters  
 NAME 140919-1kb-personal  
 EXPNO 5  
 PROCNO 1

F2 - Acquisition Parameters  
 Date\_ 20140920  
 Time 4.45  
 INSTRUM spect  
 PROBHD 5 mm PABBO BB-  
 PULPROG zg  
 TD 65536  
 SOLVENT D2O  
 NS 16  
 DS 0  
 SWH 9009.009 Hz  
 FIDRES 0.137467 Hz  
 AQ 3.6372480 sec  
 RG 45.2  
 DW 55.500 usec  
 DE 9.39 usec  
 TE 308.1 K  
 D1 5.00000000 sec  
 TD0 1

----- CHANNEL f1 -----  
 SF01 600.1339008 MHz  
 NUC1 1H  
 P1 12.74 usec  
 PLW1 16.5960067 W

F2 - Processing parameters  
 SI 131.072  
 SF 600.1300000 MHz  
 WDW no  
 SSB 0  
 LB 0 Hz  
 GB 0  
 PC 1.00

7.1 CYC FREE - D2O - 13C

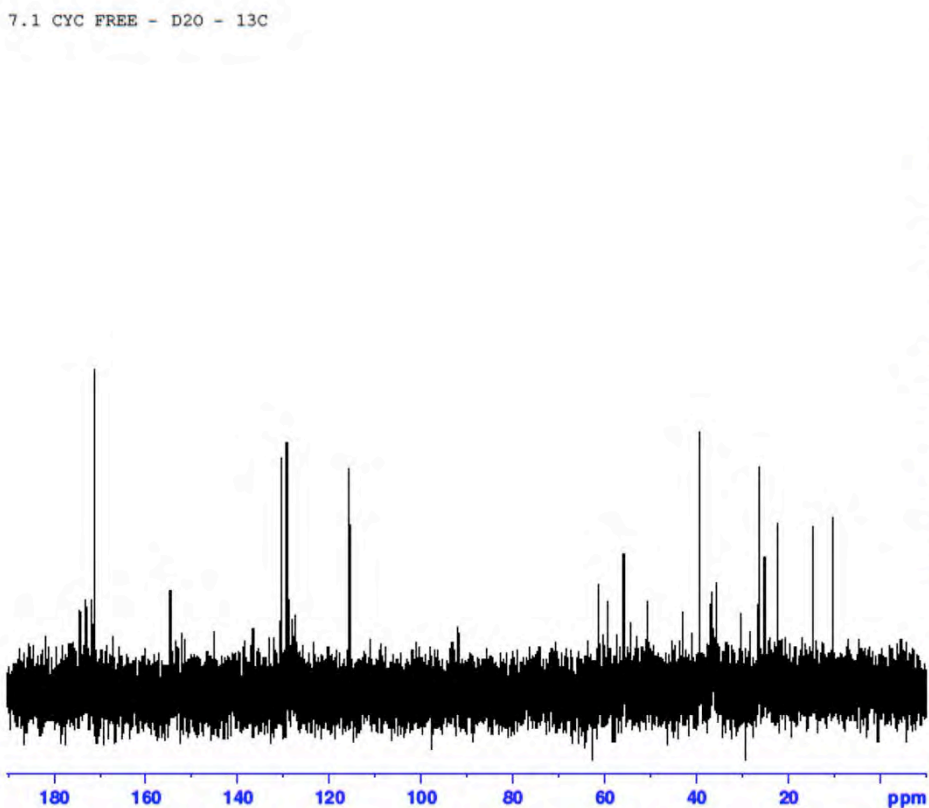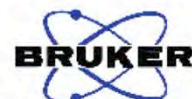

Current Data Parameters  
 NAME 140919-1kb-personal  
 EXPNO 6  
 PROCNO 1

F2 - Acquisition Parameters  
 Date\_ 20140920  
 Time 8.25  
 INSTRUM spect  
 PROBHD 5 mm PABBO BB-  
 PULPROG zgpg30  
 TD 65536  
 SOLVENT D2O  
 NS 4096  
 DS 4  
 SWH 30241.936 Hz  
 FIDRES 0.461455 Hz  
 AQ 1.0835285 sec  
 RG 2050  
 DW 16.533 usec  
 DE 7.01 usec  
 TE 308.0 K  
 D1 2.00000000 sec  
 D11 0.03000000 sec  
 TD0 1

----- CHANNEL f1 -----  
 SF01 150.9163903 MHz  
 NUC1 13C  
 P1 11.90 usec  
 PLW1 115.09999847 W

----- CHANNEL f2 -----  
 SF02 600.1324005 MHz  
 NUC2 1H  
 CPDPRG2 bl\_waltz65\_256  
 PCPD2 70.00 usec  
 PLW2 16.59600067 W  
 PLW12 0.52078003 W  
 PLW13 0.25518000 W

F2 - Processing parameters  
 SI 32768  
 SF 150.9028090 MHz  
 WDW EM  
 SSB 0  
 LB 1.00 Hz  
 GB 0  
 PC 1.40

## Supporting Information

### 7.1 CYC: $^1\text{H}$ - $^{13}\text{C}$ HSQC NMR and $^1\text{H}$ - $^{13}\text{C}$ HMBC NMR

7.1 CYC FREE - D2O - HSQC

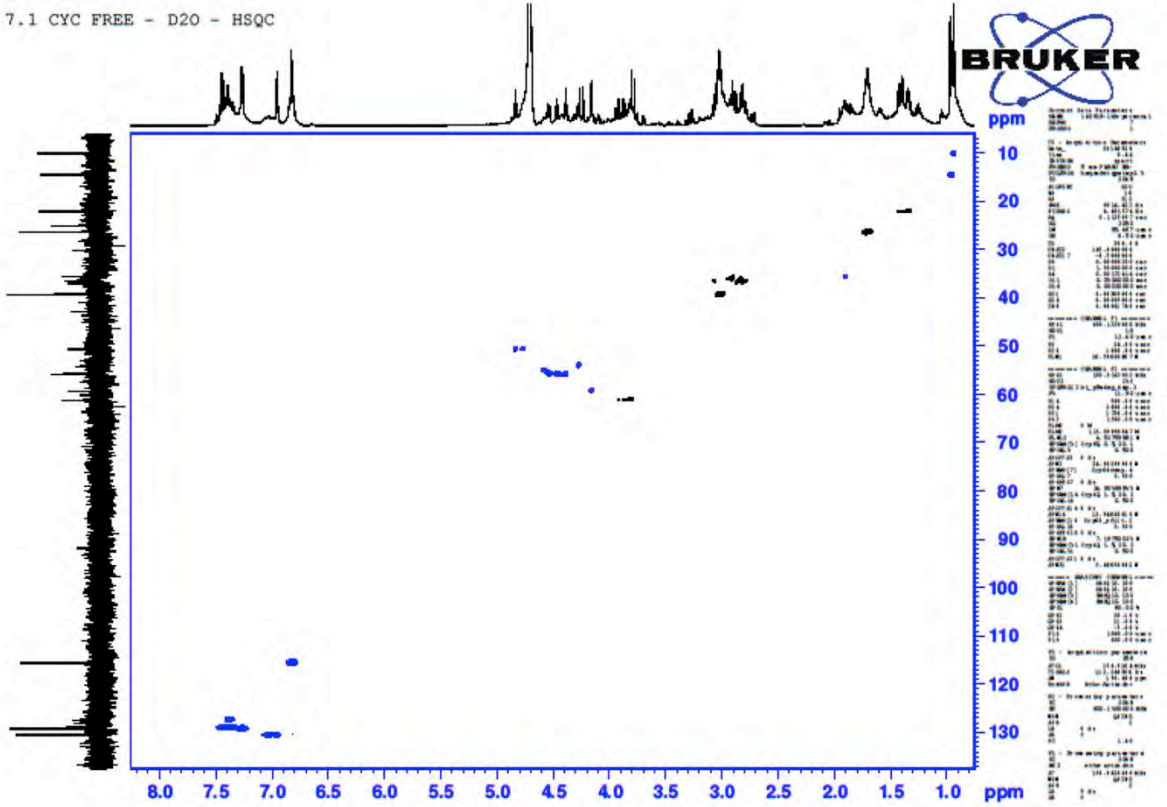

7.1 CYC FREE - D2O - HMBC

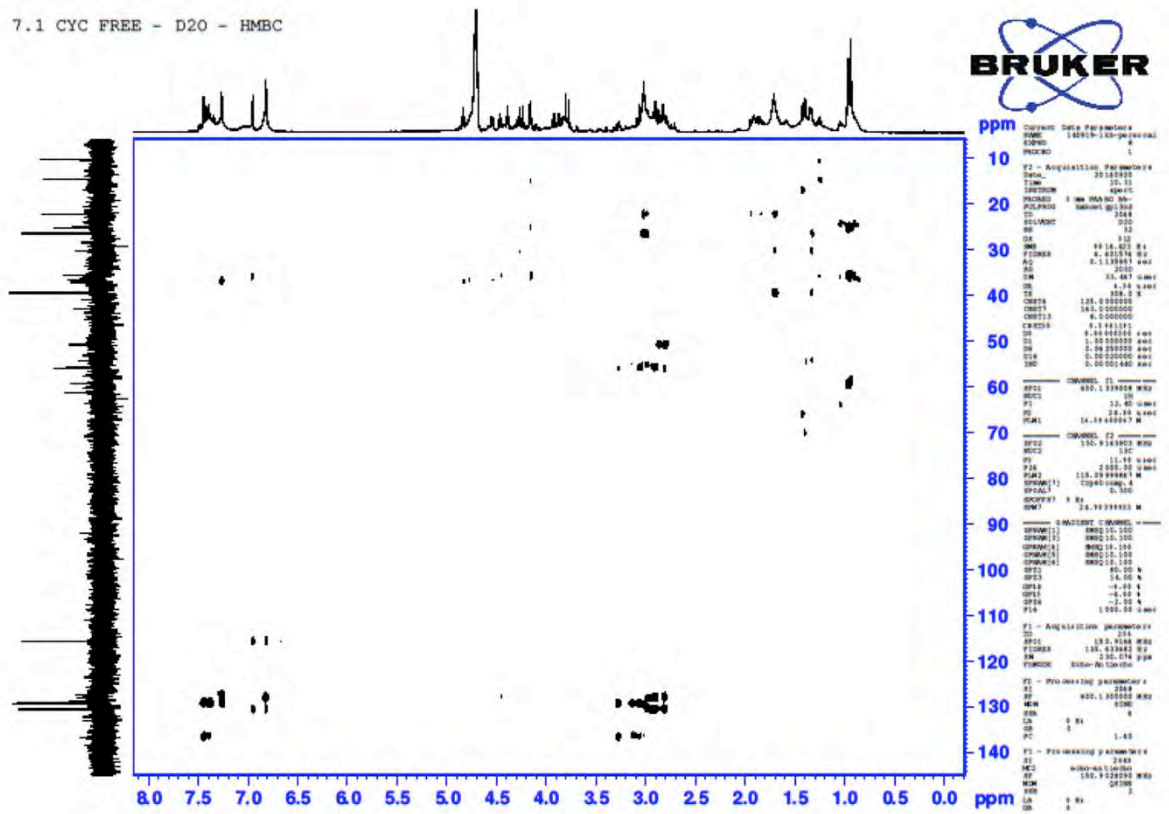

# Supporting Information

## 7.1 CYC: $^1\text{H}$ - $^1\text{H}$ COSY NMR and HRMS

7.1 CYC FREE - D2O - COSY

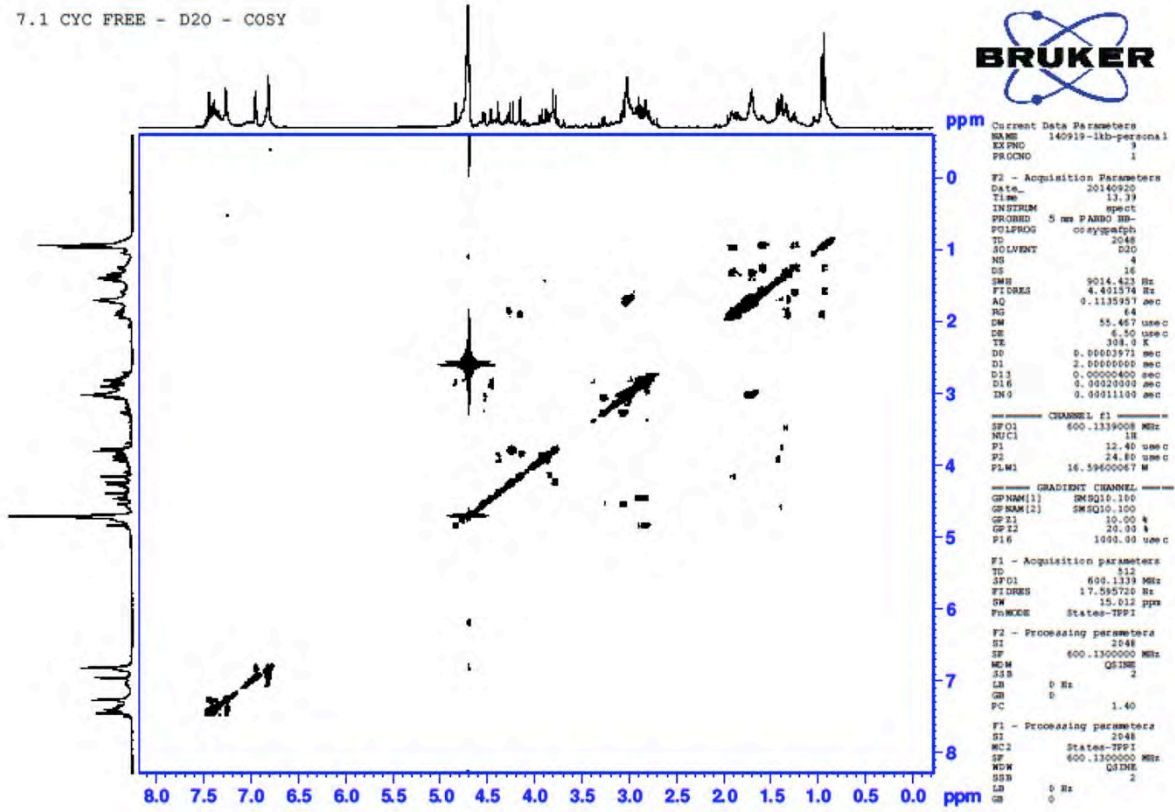

L-6\_Pos\_Full\_a #1 RT: 0.02 AV: 1 NL: 1.65E8  
 T: FTMS + c NSI Full ms [50.00-2000.00]

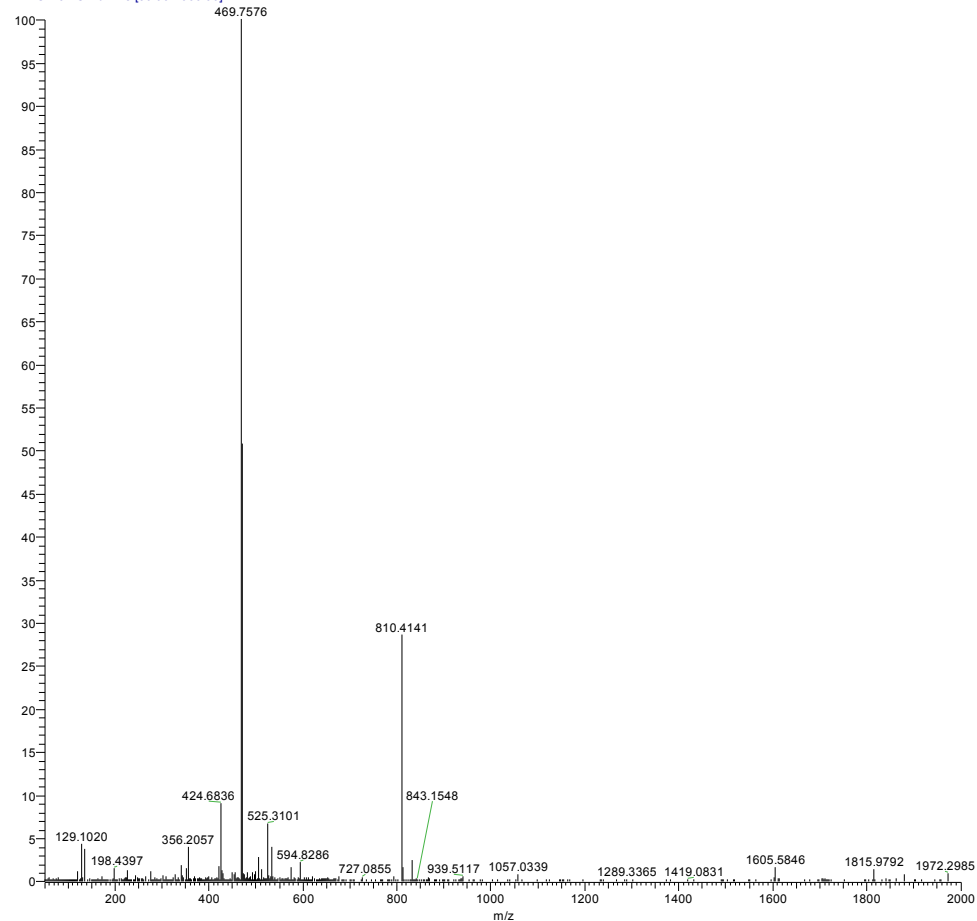



Supporting Information

7.1 CYC: LC/MS

==== Shimadzu LCMSSolution Analysis Report ====

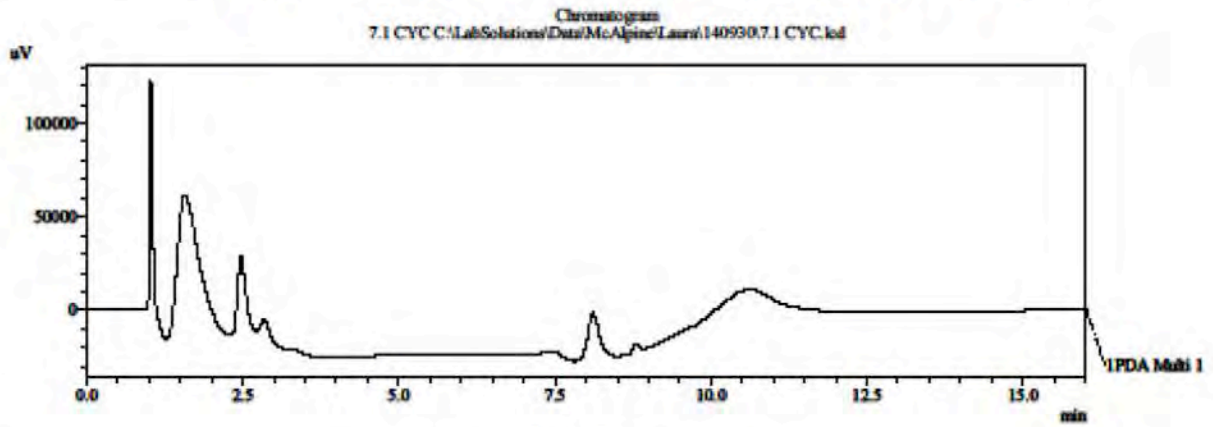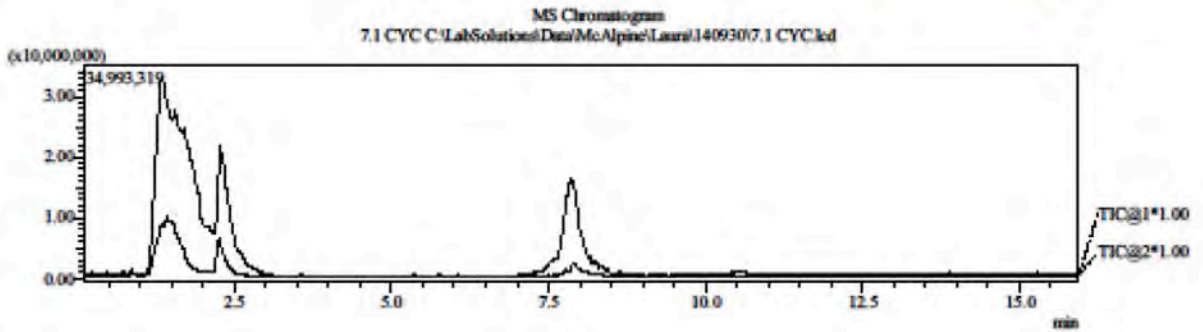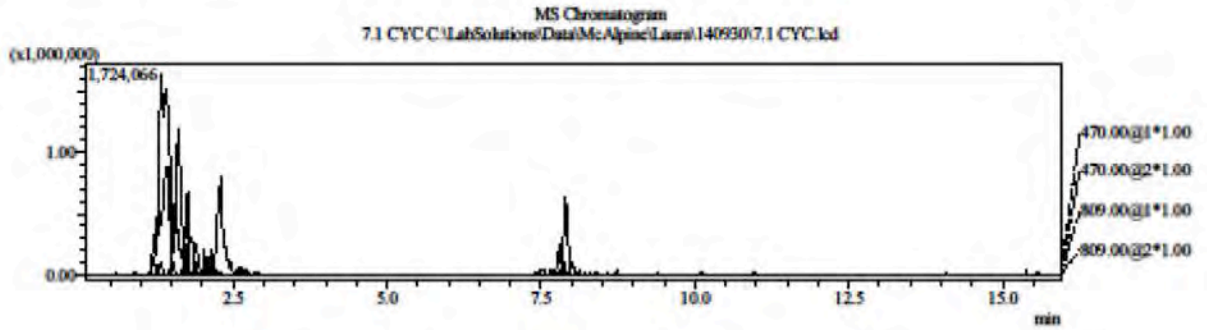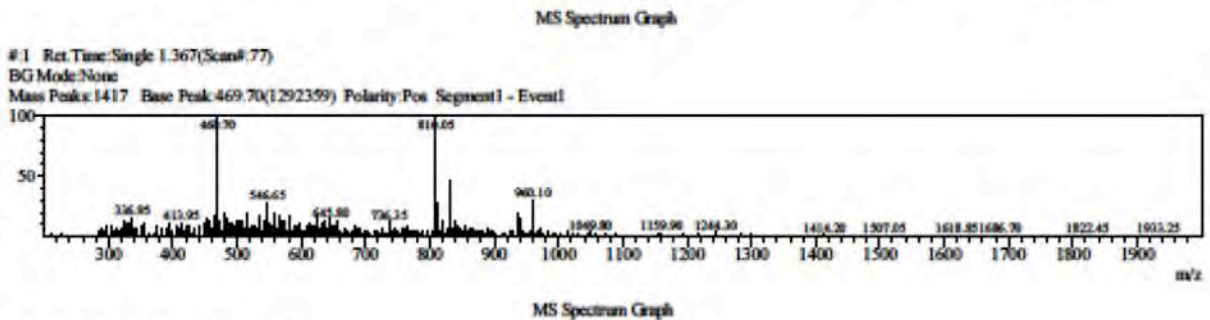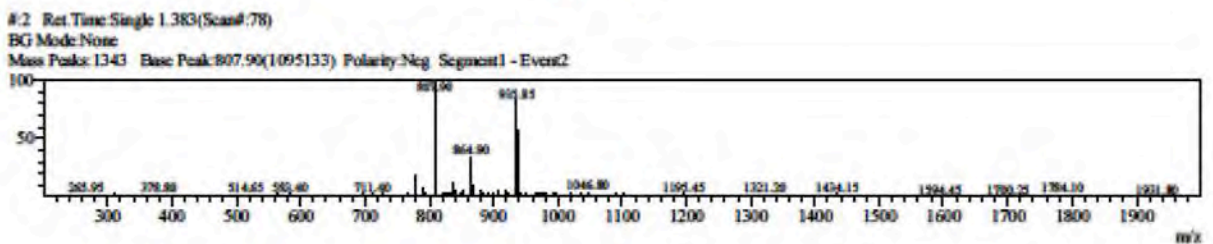

Supporting Information

8.1 LIN: <sup>1</sup>H NMR and <sup>13</sup>C NMR

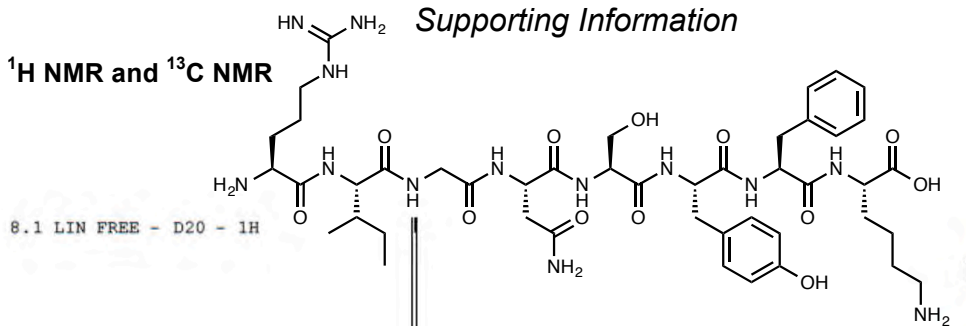

8.1 LIN FREE - D20 - 1H

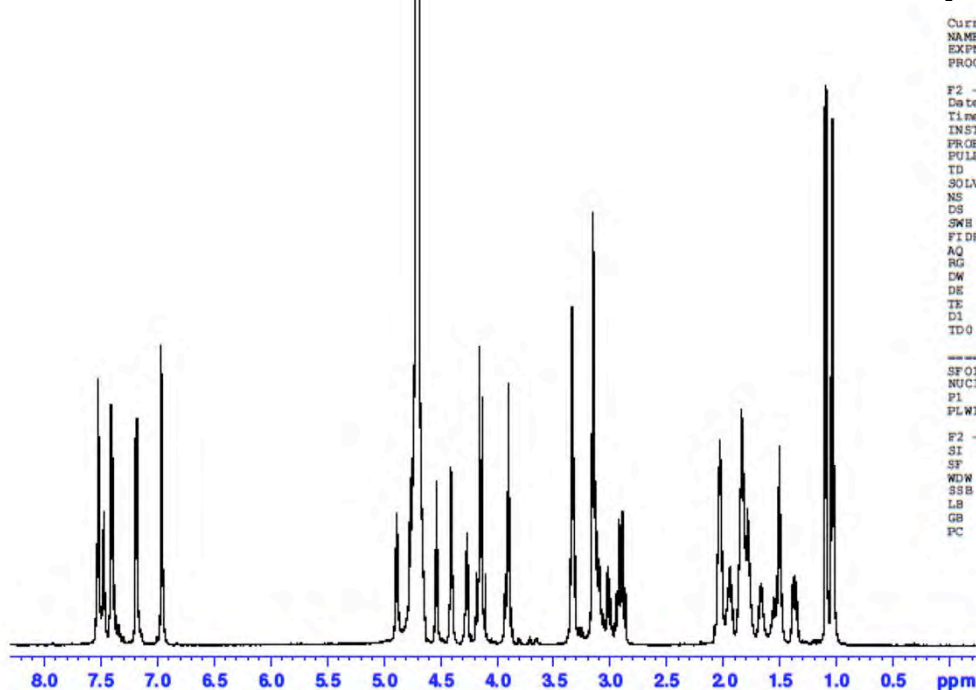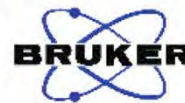

```

Current Data Parameters
NAME      140906-lkb
EXPNO    2
PROCNO   1

F2 - Acquisition Parameters
Date_    20140906
Time     21.10
INSTRUM  spect
PROBHD   5 mm PABBO BB-
PULPROG  zg
TD        65536
SOLVENT  D2O
NS        16
DS        8
SWH       9009.009 Hz
FIDRES    0.137467 Hz
AQ        3.6372480 sec
RG         45.2
DW         55.500 usec
DE         9.61 usec
TE        298.0 K
D1        5.0000000 sec
TD0       1

----- CHANNEL f1 -----
SF01     600.1333007 MHz
NUC1      1H
P1        12.40 usec
PLW1     16.59600067 W

F2 - Processing parameters
SI        131072
SF        600.1300000 MHz
WDW       EM
SSB       0
LB        0.30 Hz
GB        0
PC        1.00
    
```

8.1 LIN FREE - D20 - 13C

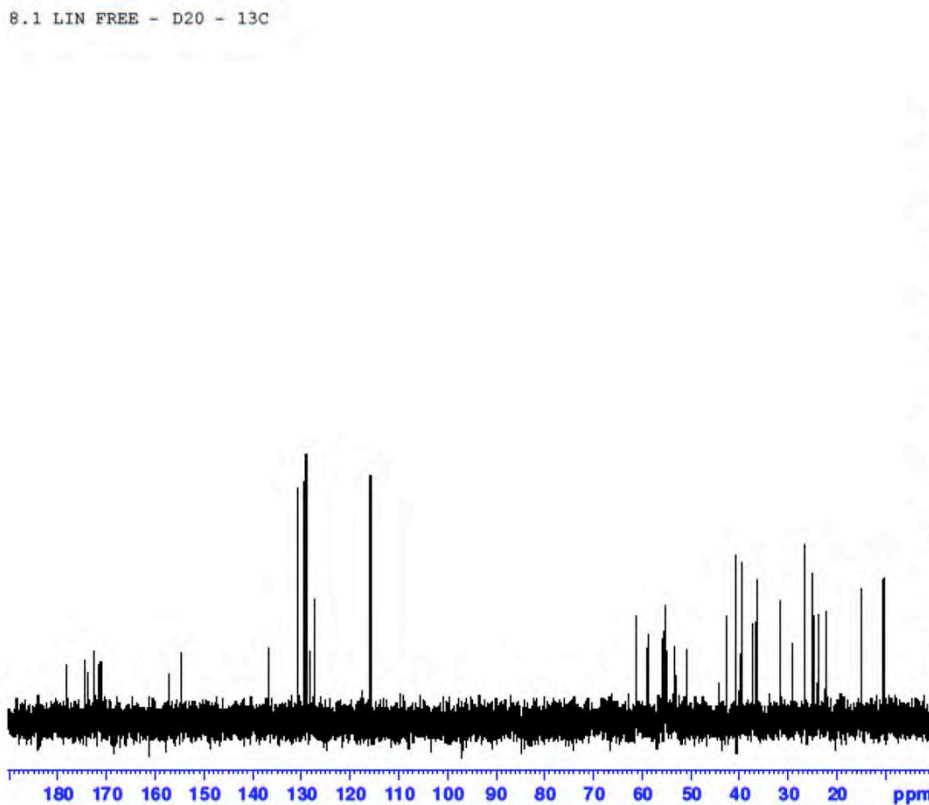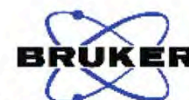

```

Current Data Parameters
NAME      140910-lkb
EXPNO    1
PROCNO   1

F2 - Acquisition Parameters
Date_    20140910
Time     11.52
INSTRUM  spect
PROBHD   5 mm PABBO BB-
PULPROG  zgpg30
TD        65536
SOLVENT  D2O
NS        3072
DS        4
SWH       30241.936 Hz
FIDRES    0.461455 Hz
AQ        1.0835285 sec
RG         2050
DW         16.533 usec
DE         7.01 usec
TE        318.3 K
D1        2.0000000 sec
D11       0.0300000 sec
TD0       1

----- CHANNEL f1 -----
SF01     150.9163903 MHz
NUC1      13C
P1        11.90 usec
PLW1     115.09999847 W

----- CHANNEL f2 -----
SF02     600.1324005 MHz
NUC2      1H
CPDPRG2  [2 bi_waltz65_256
PCPD2     70.00 usec
PLW2     16.59600067 W
PLW12    0.52078003 W
PLW13    0.25518000 W

F2 - Processing parameters
SI        32768
SF        150.9028090 MHz
WDW       EM
SSB       0
LB        1.00 Hz
GB        0
PC        1.40
    
```

# Supporting Information

## 8.1 LIN: ${}^1\text{H}$ - ${}^{13}\text{C}$ HSQC NMR and ${}^1\text{H}$ - ${}^{13}\text{C}$ HMBC NMR

8.1 LIN FREE - D2O - HSQC

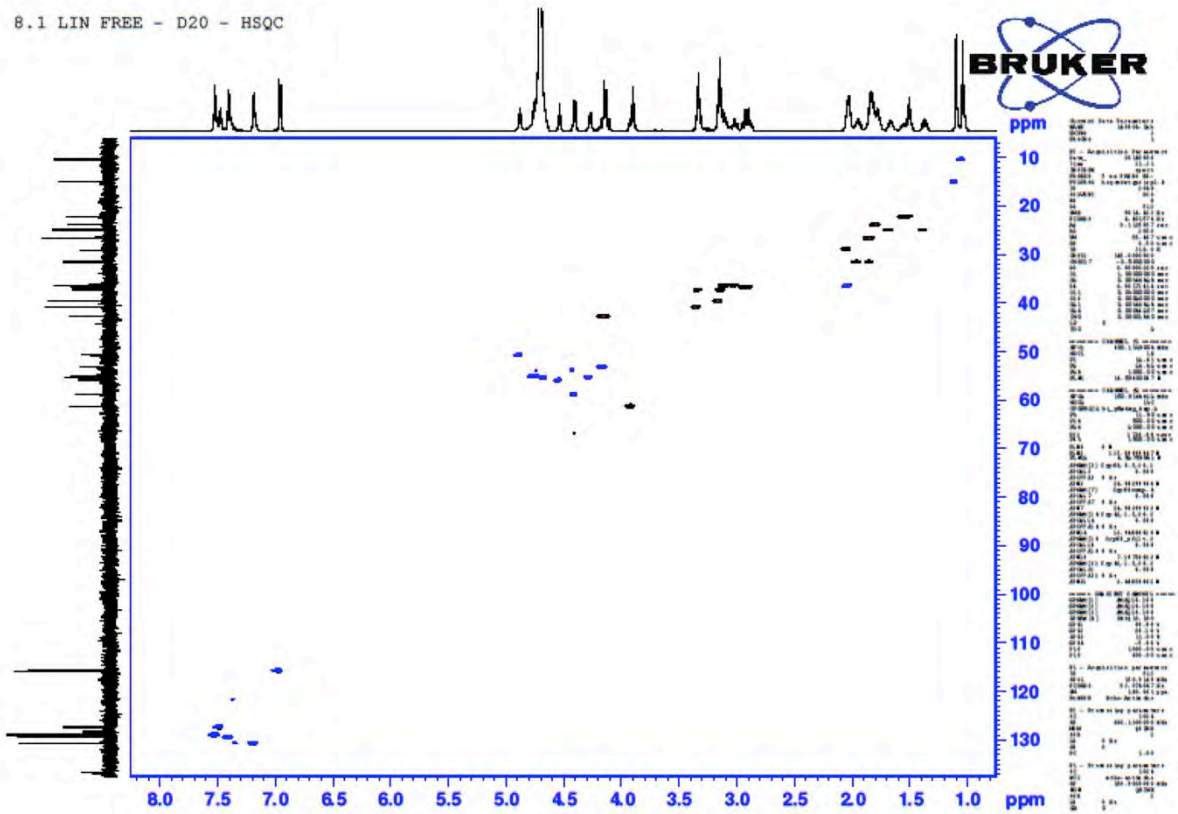

8.1 LIN FREE - D2O - HMBC

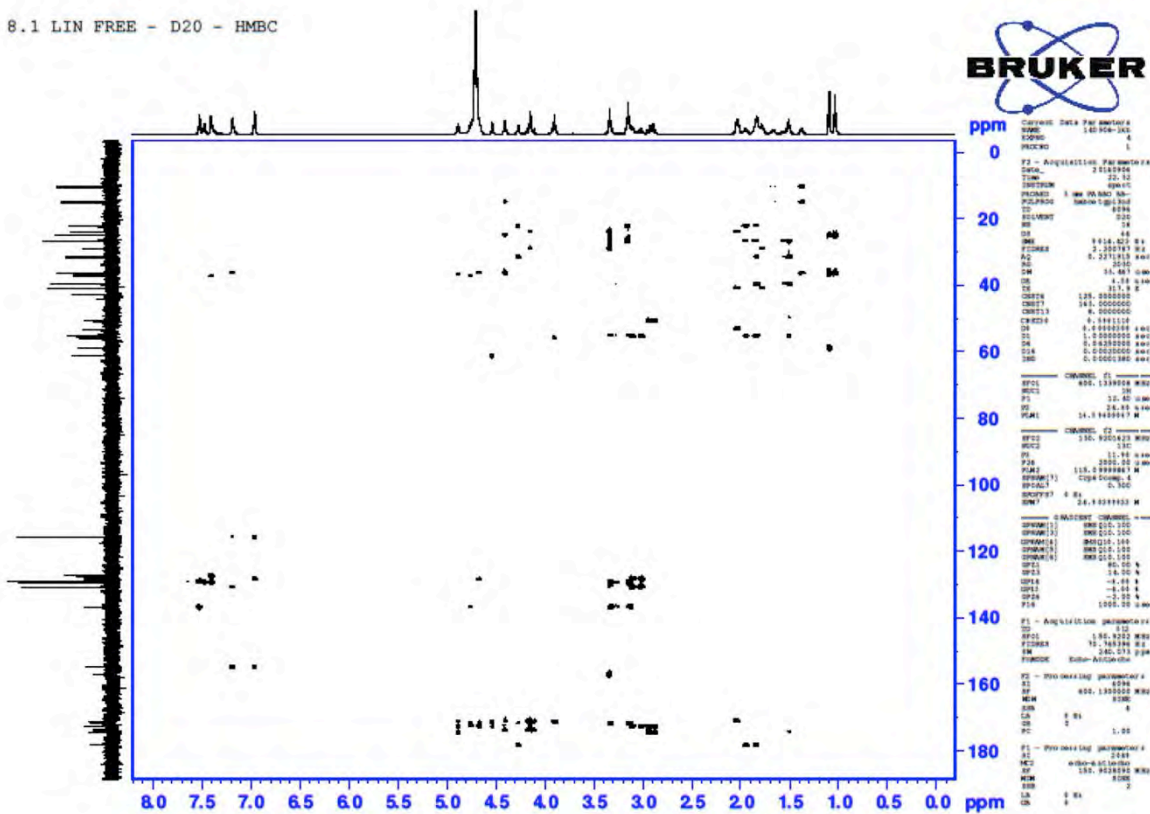

# Supporting Information

## 8.1 LIN: <sup>1</sup>H-<sup>1</sup>H COSY NMR and HRMS

8.1 LIN FREE - D2O - COSY

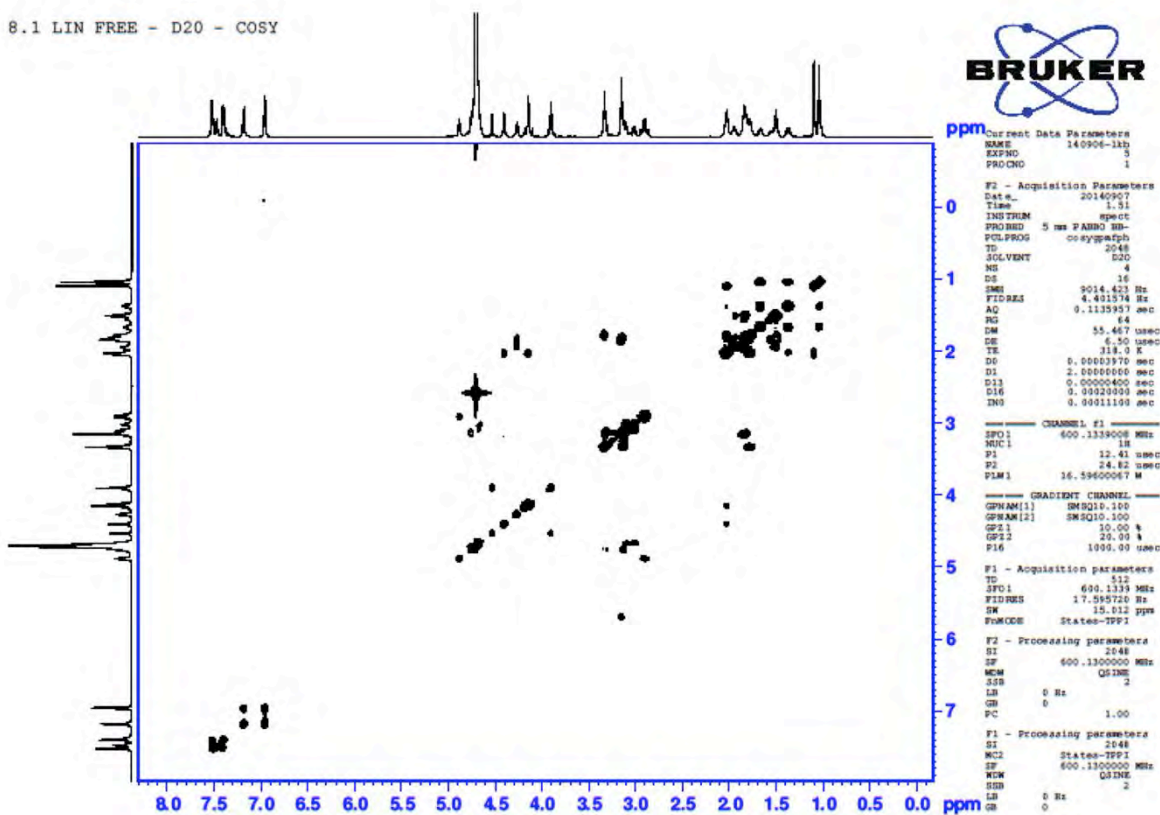

L-7\_Pos\_Full\_a#7 RT: 0.35 AV: 1 NL: 4.66E7  
T: FIMS + c NSI Full ms [50.00-2000.00]

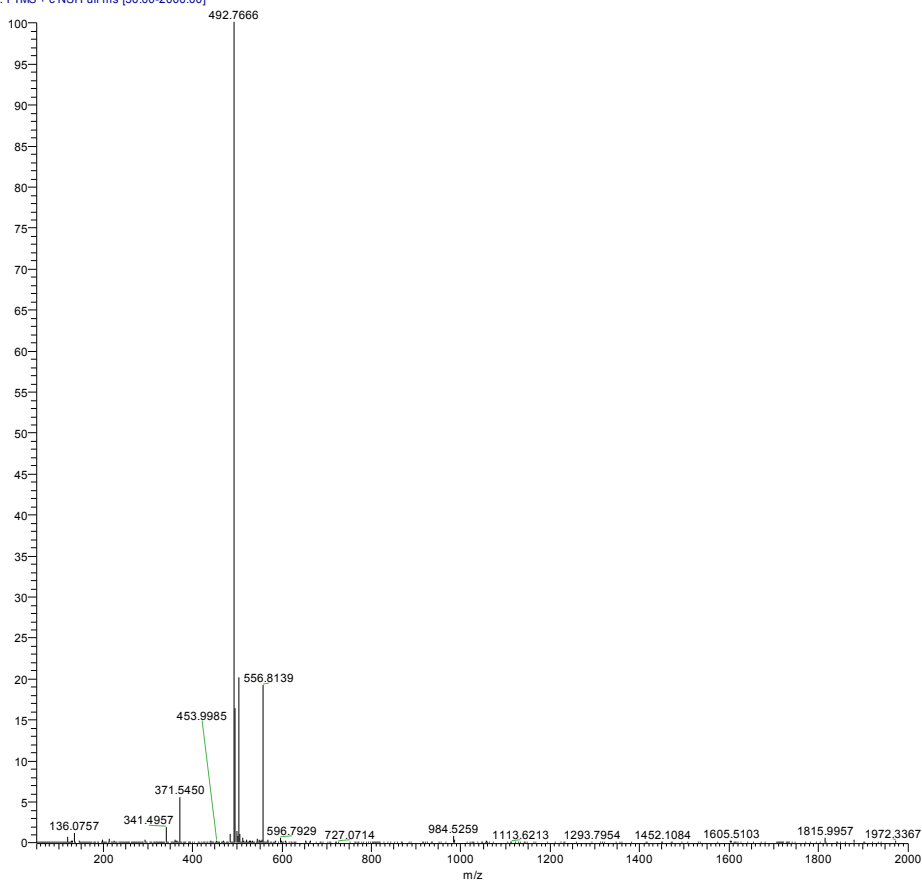

Supporting Information

8.1 LIN: LC/MS

==== Shimadzu LCMSsolution Analysis Report ====

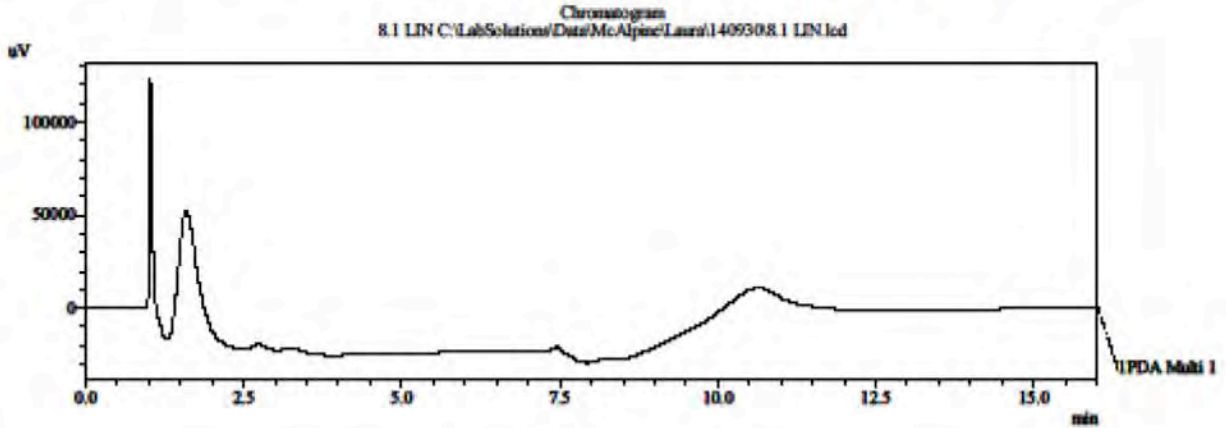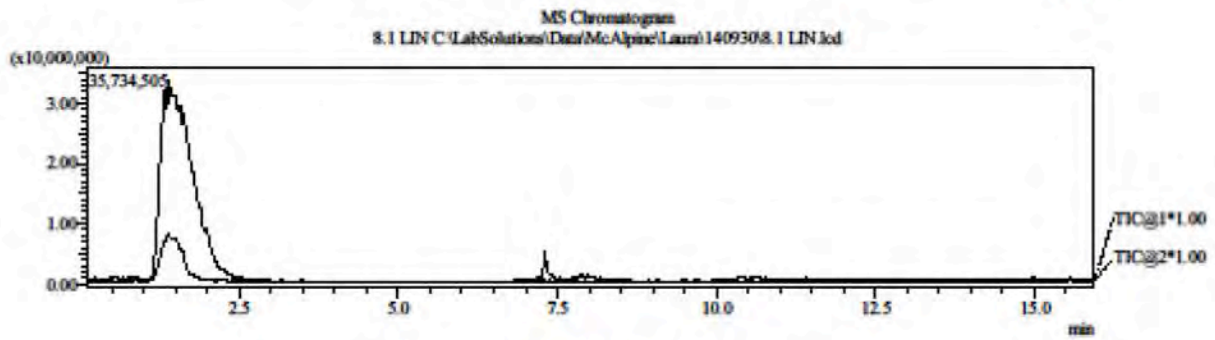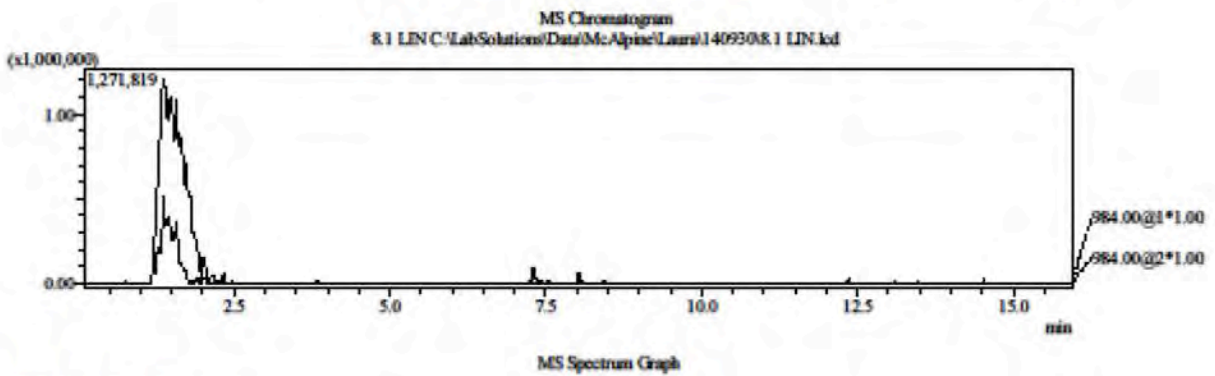

MS Spectrum Graph

#1 Ret.Time:Single 1.400(Scan#79)

BG Mode:None

Mass Peaks:1398 Base Peak:492.70(8053799) Polarity:Pos Segment1 - Event1

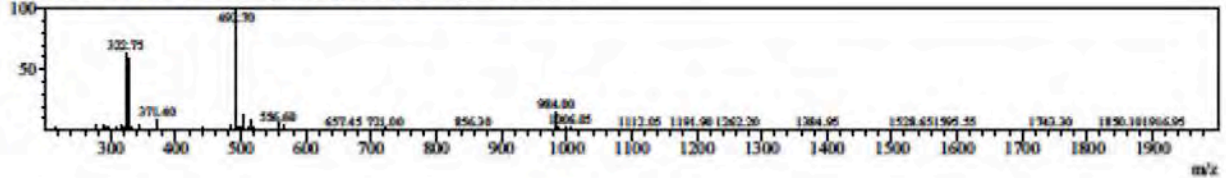

MS Spectrum Graph

#2 Ret.Time:Single 1.417(Scan#80)

BG Mode:None

Mass Peaks:1379 Base Peak:981.80(2853529) Polarity:Neg Segment1 - Event2

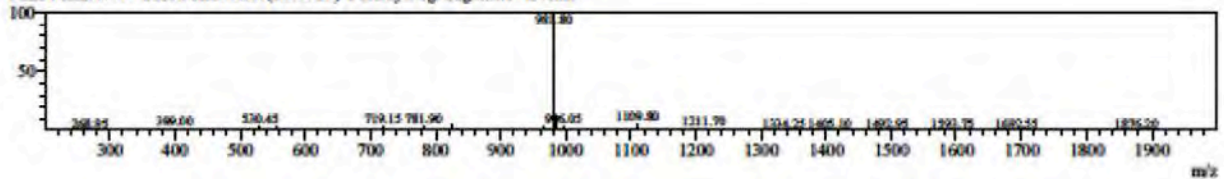

Supporting Information

8.1 CYC: <sup>1</sup>H NMR and <sup>13</sup>C NMR

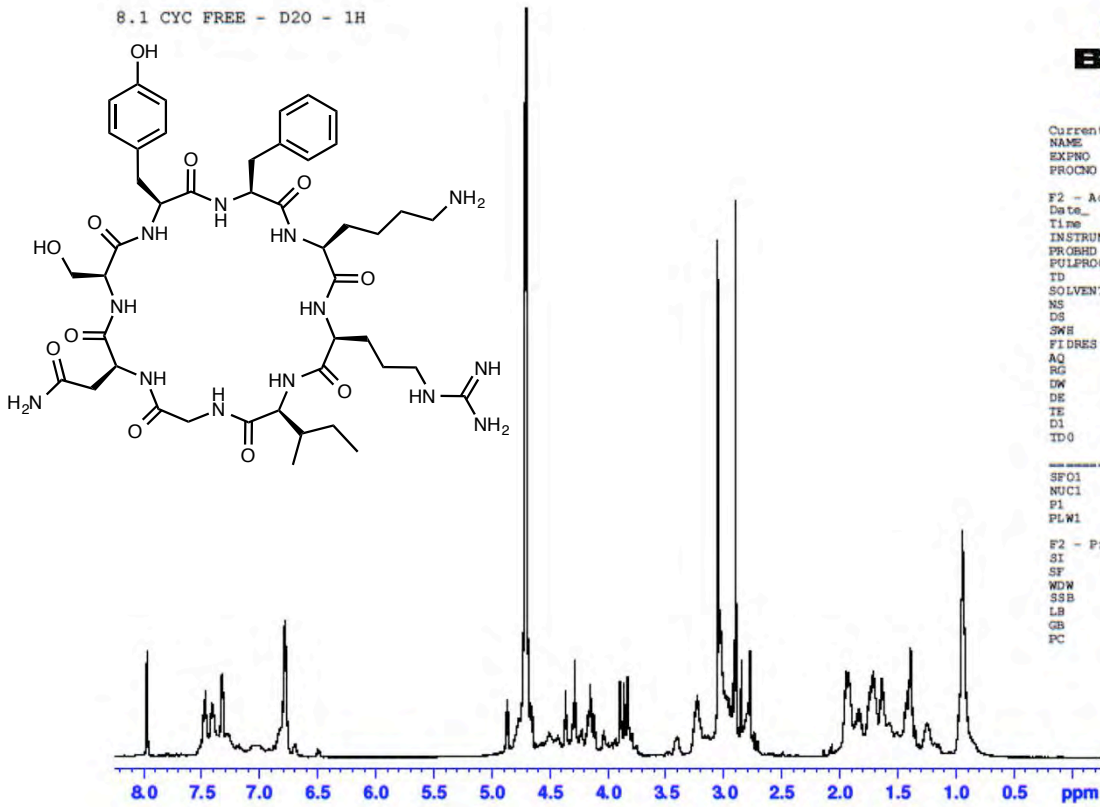

8.1 CYC FREE - D2O - 13C

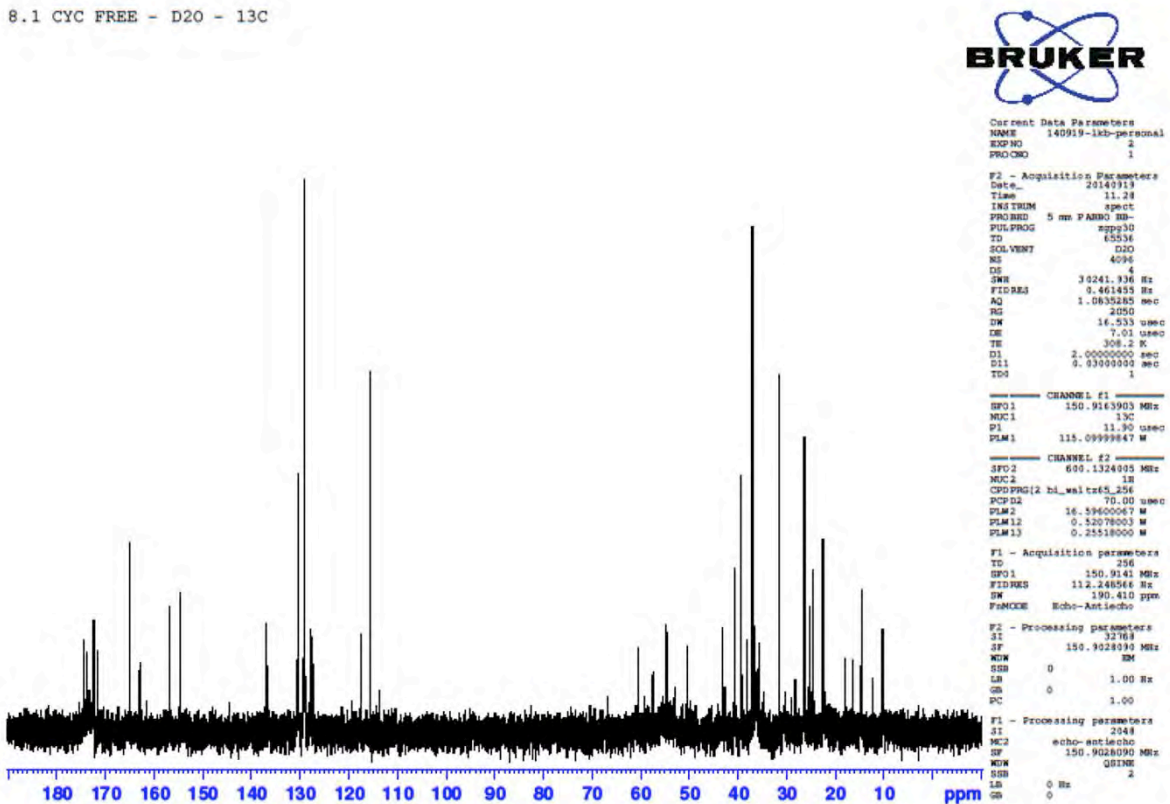

# Supporting Information

## 8.1 CYC: $^1\text{H}$ - $^{13}\text{C}$ HSQC NMR and $^1\text{H}$ - $^{13}\text{C}$ HMBC NMR

8.1 CYC FREE - D2O - HSQC

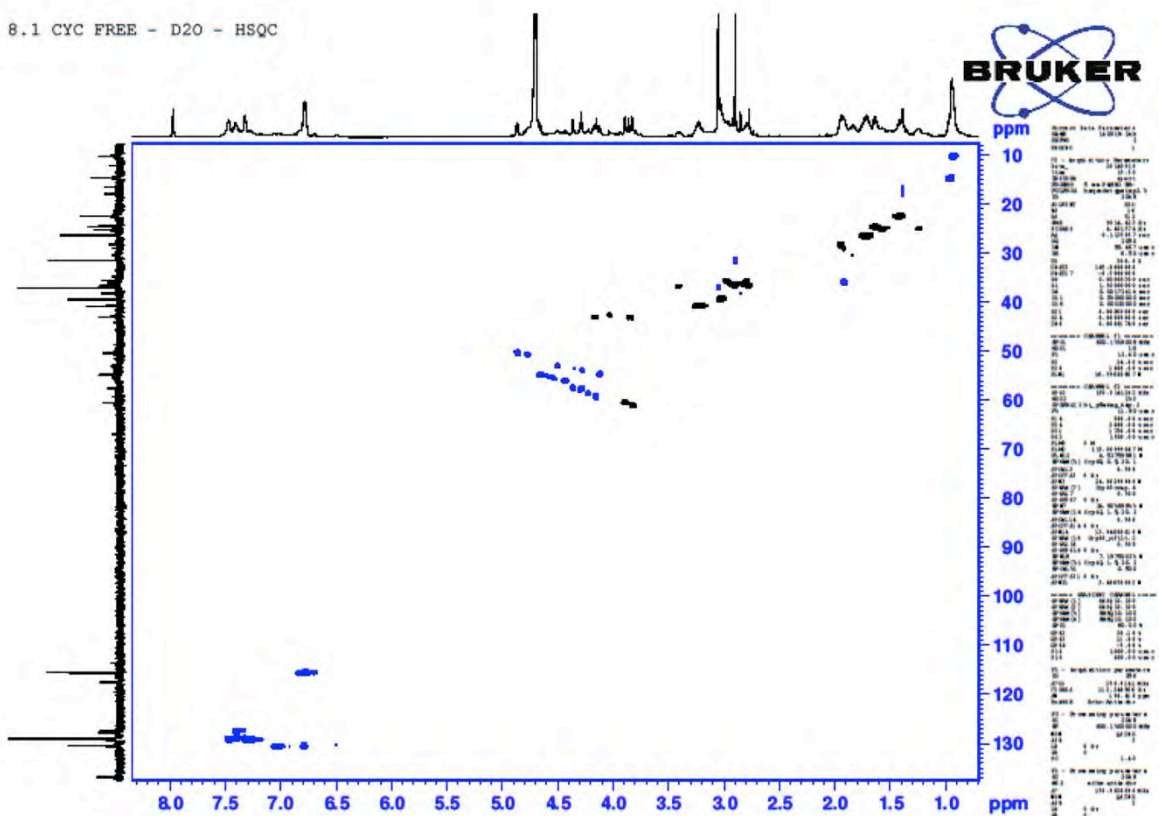

8.1 CYC FREE - D2O - HMBC

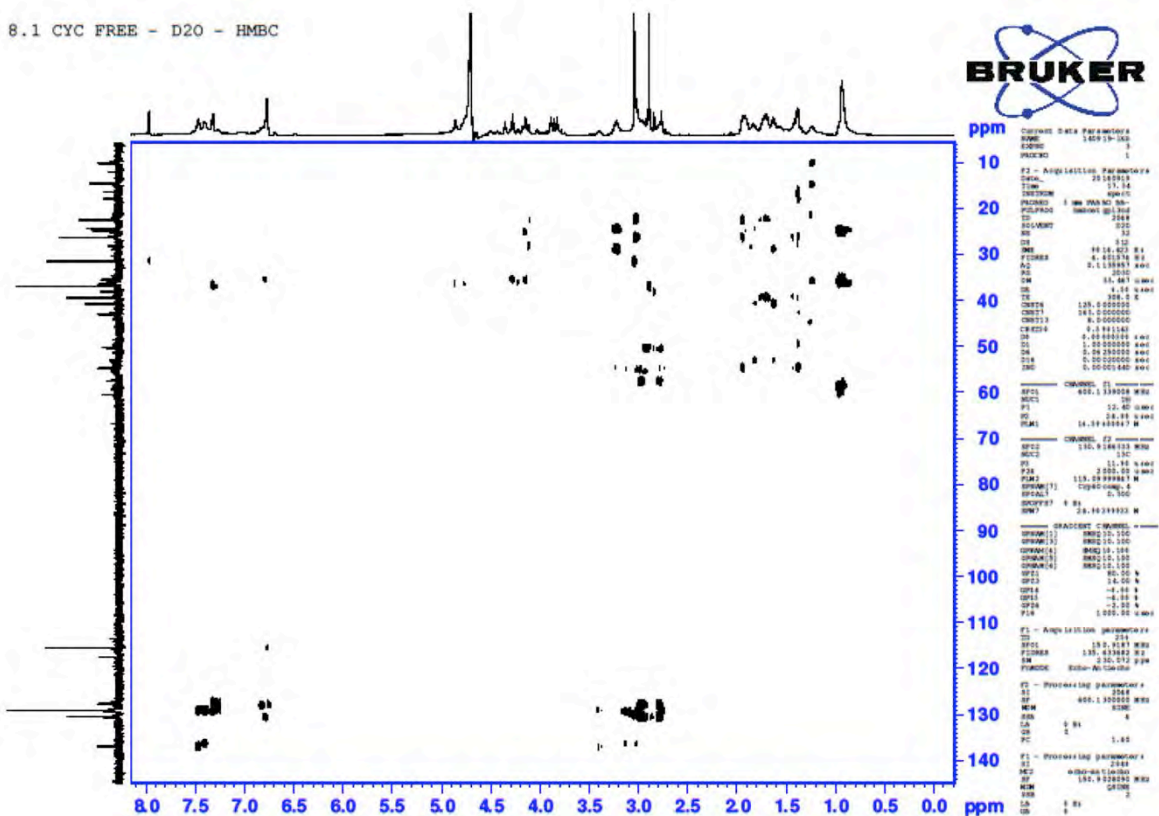

# Supporting Information

## 8.1 CYC: $^1\text{H}$ - $^1\text{H}$ COSY NMR and HRMS

8.1 CYC FREE - D2O - COSY

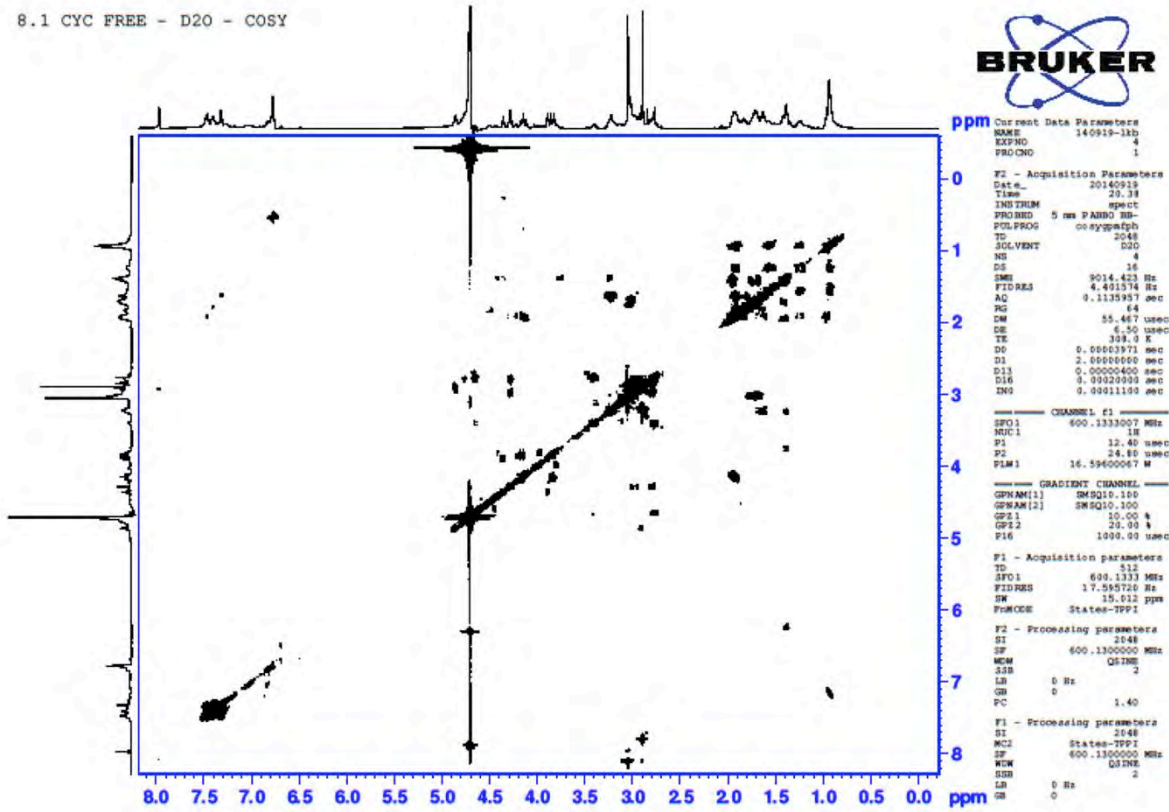

L-8\_Pos\_Full#1 RT: 0.00 AV: 1 NL: 1.64E8  
 T: FTMS + c NSI Full ms [50.00-2000.00]

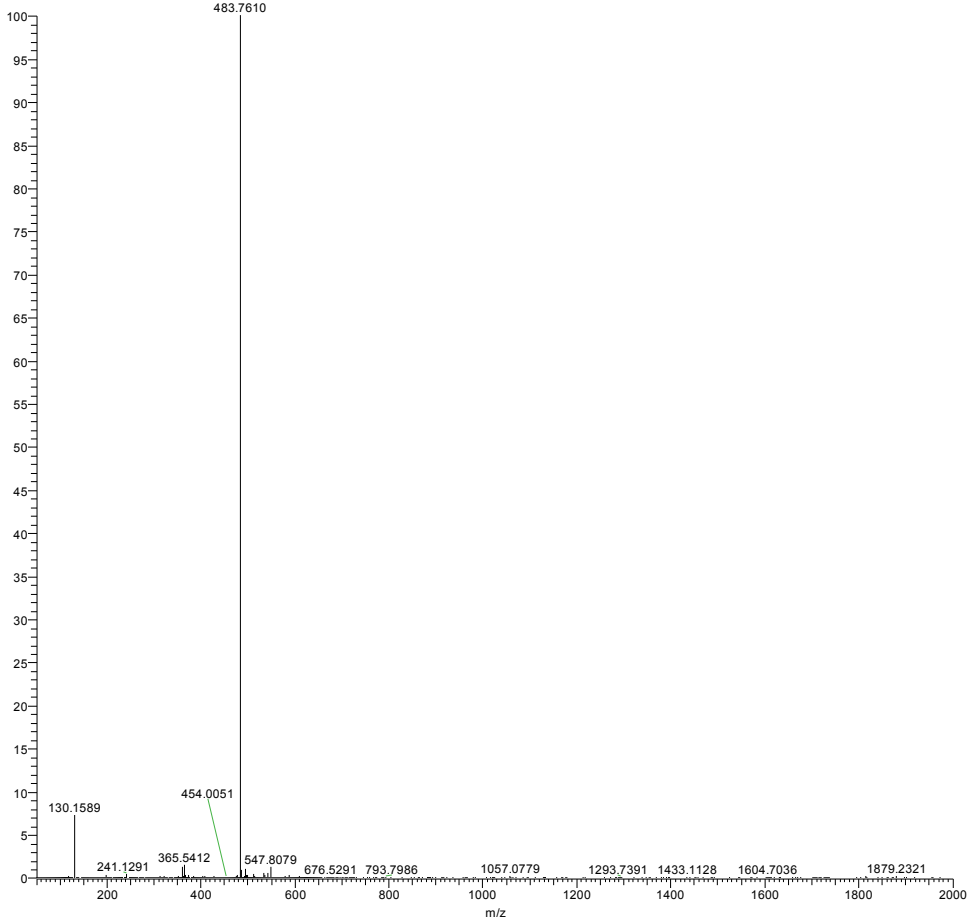



Supporting Information

8.1 CYC: LC/MS

==== Shimadzu LCMSsolution Analysis Report ====

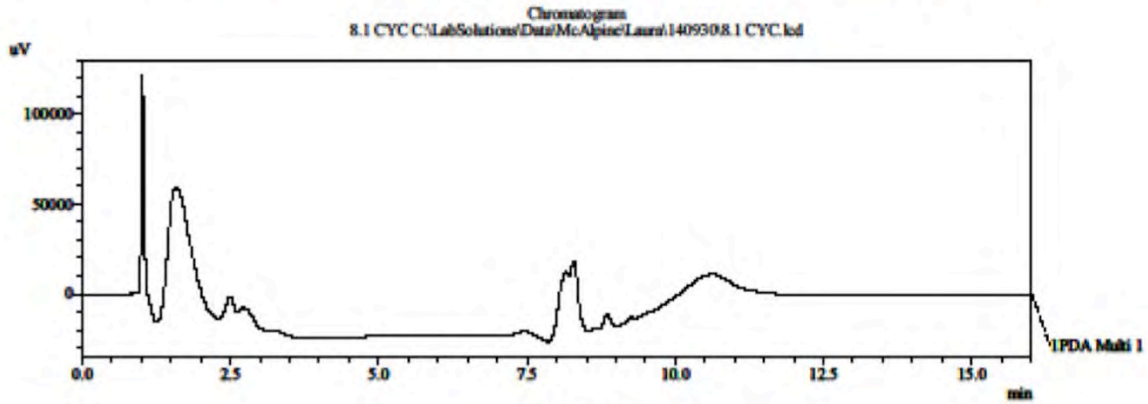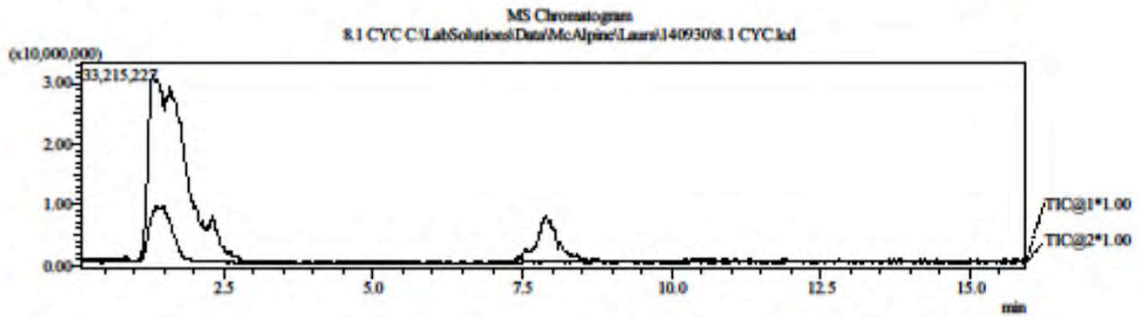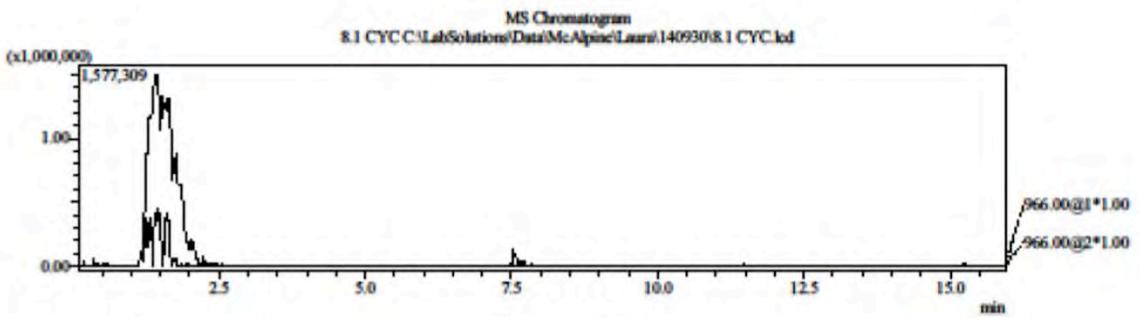

MS Spectrum Graph

#1 Ret.Time:Single 1.400(Scan# 79)  
BG Mode:None  
Mass Peaks:1534 Base Peak:483.65(8818427) Polarity:Pos Segment1 - Event1

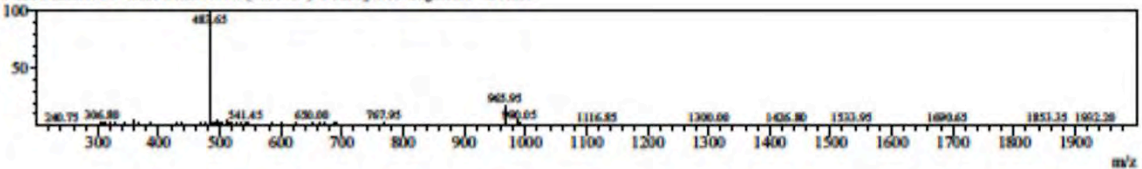

MS Spectrum Graph

#2 Ret.Time:Single 1.417(Scan# 80)  
BG Mode:None  
Mass Peaks:1541 Base Peak:963.90(2523171) Polarity:Neg Segment1 - Event2

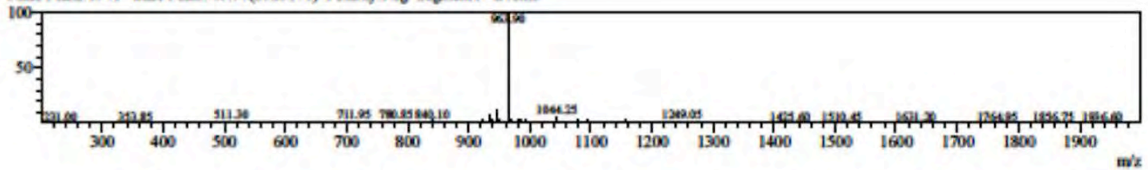

# Supporting Information

## 5.2 LIN: <sup>1</sup>H NMR and <sup>13</sup>C NMR

Lin 5.2 free

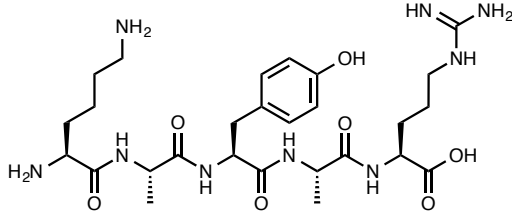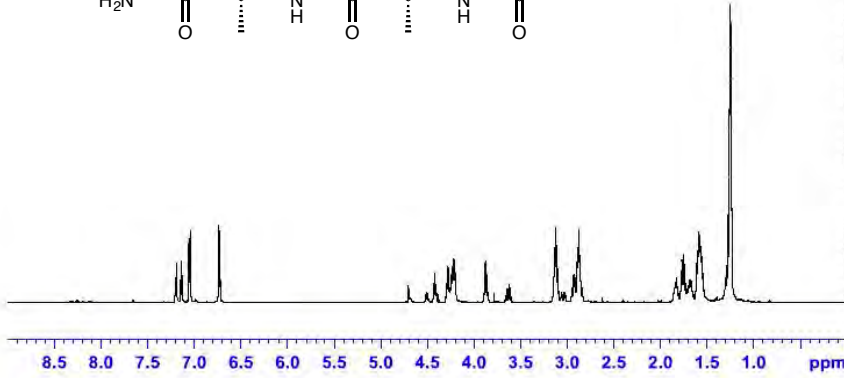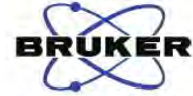

Current Data Parameters  
 NAME 140722-hwa  
 EXPNO 1  
 PROCNO 1

F2 - Acquisition Parameters  
 Date 20140722  
 Time 21.18  
 INSTRUM spect  
 PROBHD 5 mm CPTCI 1H/  
 PULPROG zgpg30  
 TD 48076  
 SOLVENT D2O  
 NS 8  
 DS 4  
 SWH 6302.521 Hz  
 FIDRES 0.131095 Hz  
 AQ 3.8140292 sec  
 RG 55.96  
 DW 79.333 usec  
 DE 39.74 usec  
 TE 298.0 K  
 D1 20.0000000 sec  
 D12 0.30002000 sec  
 TD0 1

CHANNEL F1  
 SF01 600.1628244 MHz  
 NUC1 1H  
 P1 8.00 usec  
 PLW1 3.81069994 W  
 PLW9 0.00000245 W

F2 - Processing parameters  
 SI 131072  
 SF 600.1600000 MHz  
 EM  
 SSB 0  
 LB 0.30 Hz  
 GB 0  
 PC 1.00

Lin 5.2 free C-NMR

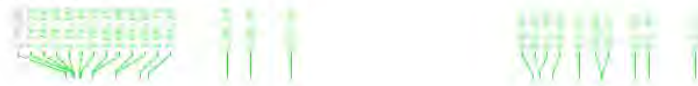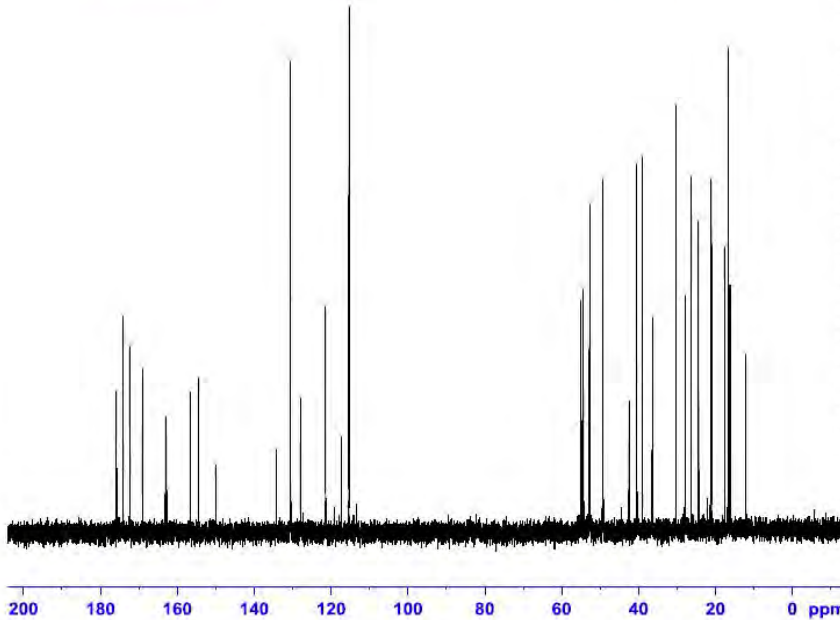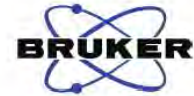

Current Data Parameters  
 NAME 140825-hwa  
 EXPNO 1  
 PROCNO 1

F2 - Acquisition Parameters  
 Date 20140825  
 Time 20.38  
 INSTRUM spect  
 PROBHD 5 mm PABBO BB-  
 PULPROG zgpg30  
 TD 65536  
 SOLVENT D2O  
 NS 16640  
 DS 4  
 SWH 32894.738 Hz  
 FIDRES 0.501934 Hz  
 AQ 0.9961472 sec  
 RG 2050  
 DW 15.200 usec  
 DE 7.93 usec  
 TE 298.2 K  
 D1 2.00000000 sec  
 D11 0.03000000 sec  
 TD0 1

CHANNEL F1  
 SF01 150.9171431 MHz  
 NUC1 13C  
 P1 11.90 usec  
 PLW1 115.09999847 W

CHANNEL F2  
 SF02 600.1324005 MHz  
 NUC2 1H  
 CPDPRG2 bi\_waltz65 256  
 PCPD2 70.00 usec  
 PLW2 16.59600067 W  
 PLW12 0.52078003 W  
 PLW13 0.25518000 W

F2 - Processing parameters  
 SI 32768  
 SF 150.9028090 MHz  
 EM  
 SSB 0  
 LB 1.00 Hz  
 GB 0  
 PC 1.40

# Supporting Information

## 5.2 LIN: HRMS

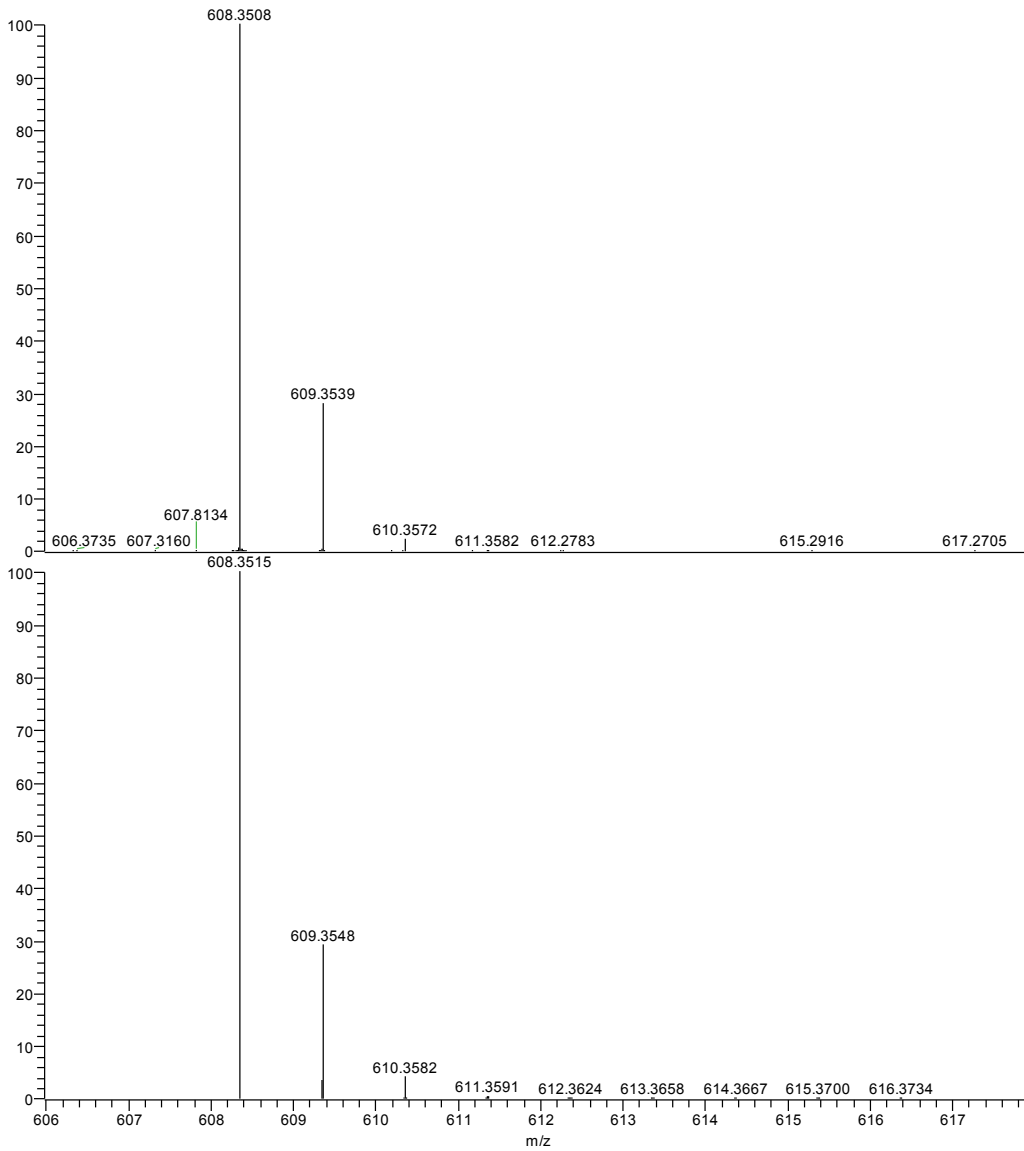

NL:  
3.80E7  
H-1\_Pos\_Full#11  
RT: 0.58 AV: 1 T:  
FTMS + c NSI Full  
ms  
[100.00-2000.00]

NL:  
7.08E5  
C<sub>27</sub>H<sub>45</sub>N<sub>5</sub>O<sub>7</sub>+H:  
C<sub>27</sub>H<sub>46</sub>N<sub>5</sub>O<sub>7</sub>  
pa Chrg 1

# Supporting Information

## 5.2 LIN: LC/MS

### ==== Shimadzu LCMSsolution Analysis Report ====

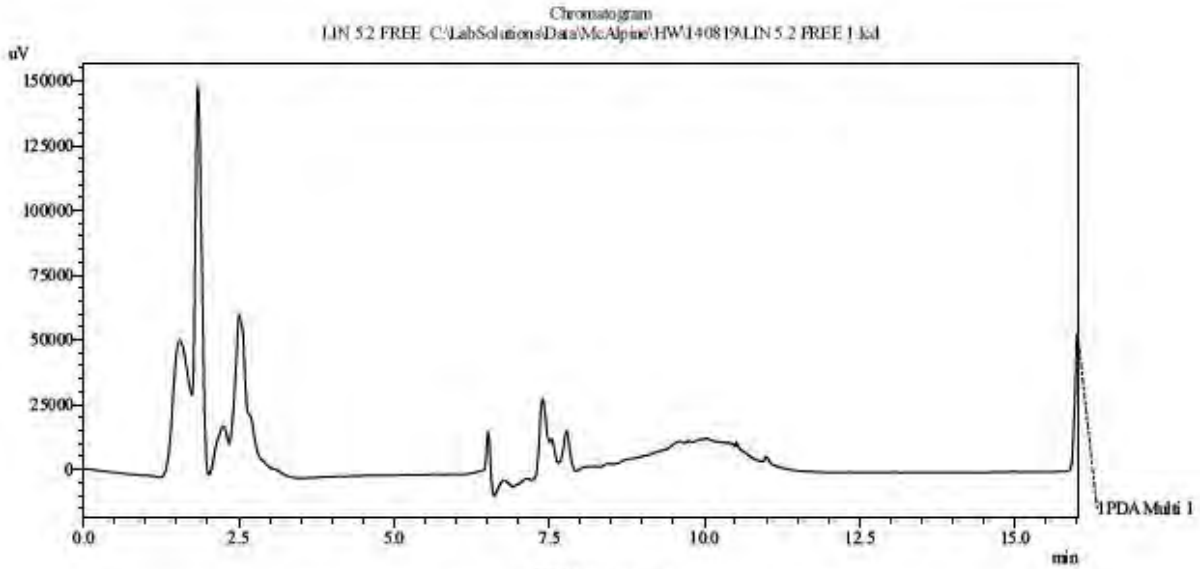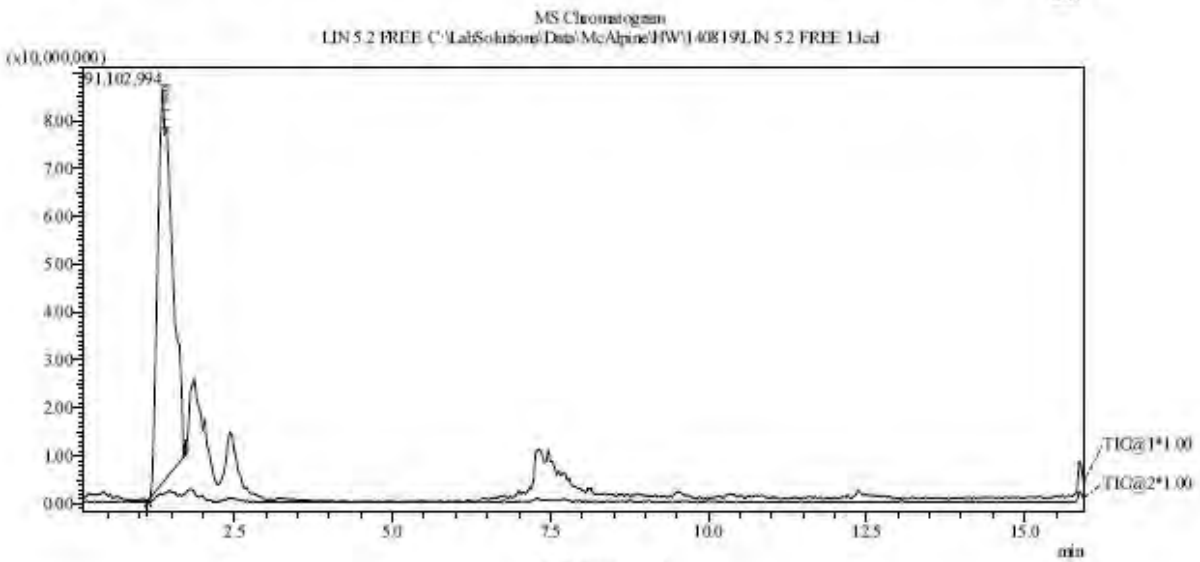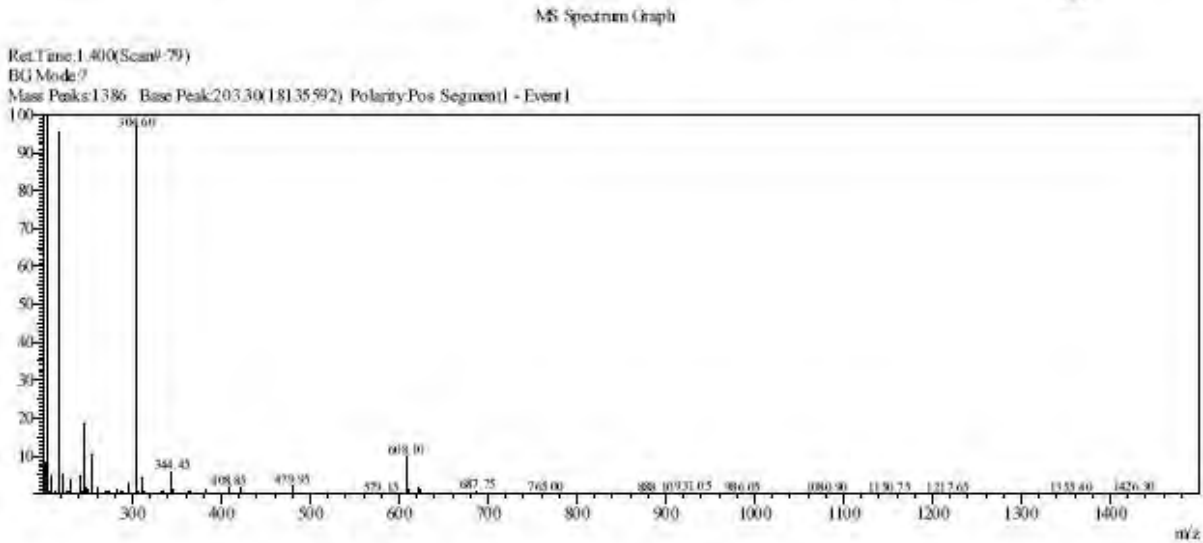

## Supporting Information

### 5.2 CYC: $^1\text{H}$ NMR and $^1\text{H}$ - $^{13}\text{C}$ HSQC NMR

Cyc 5.2 free 2 318K

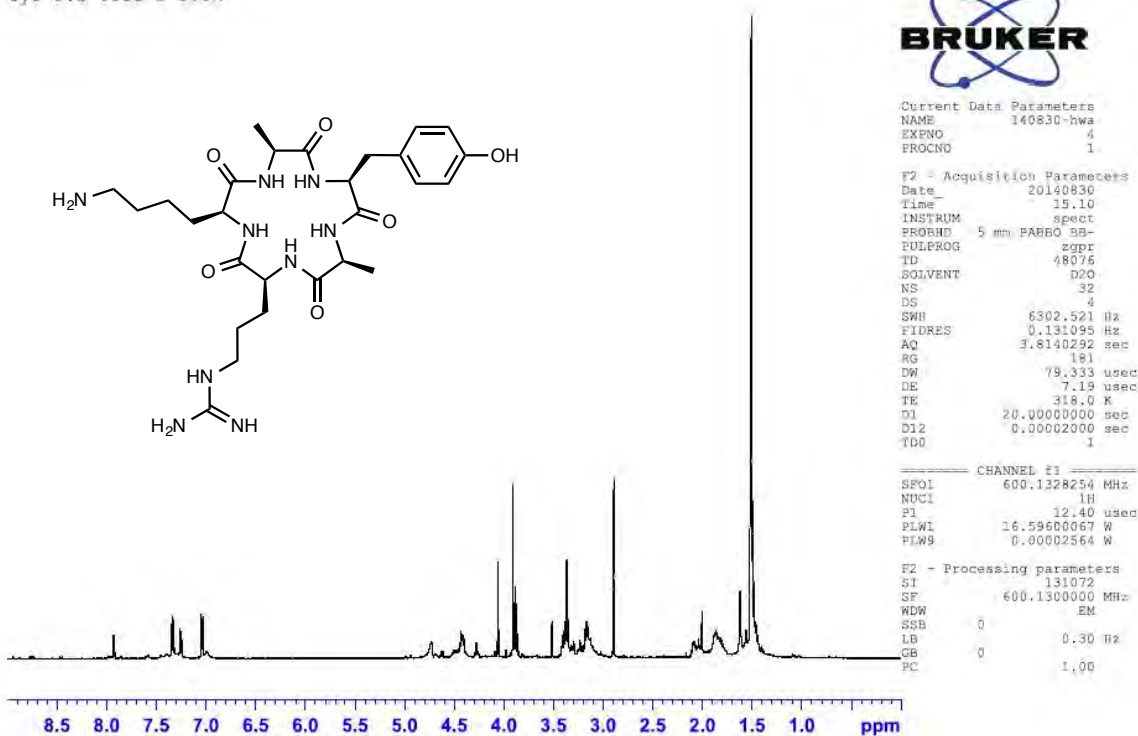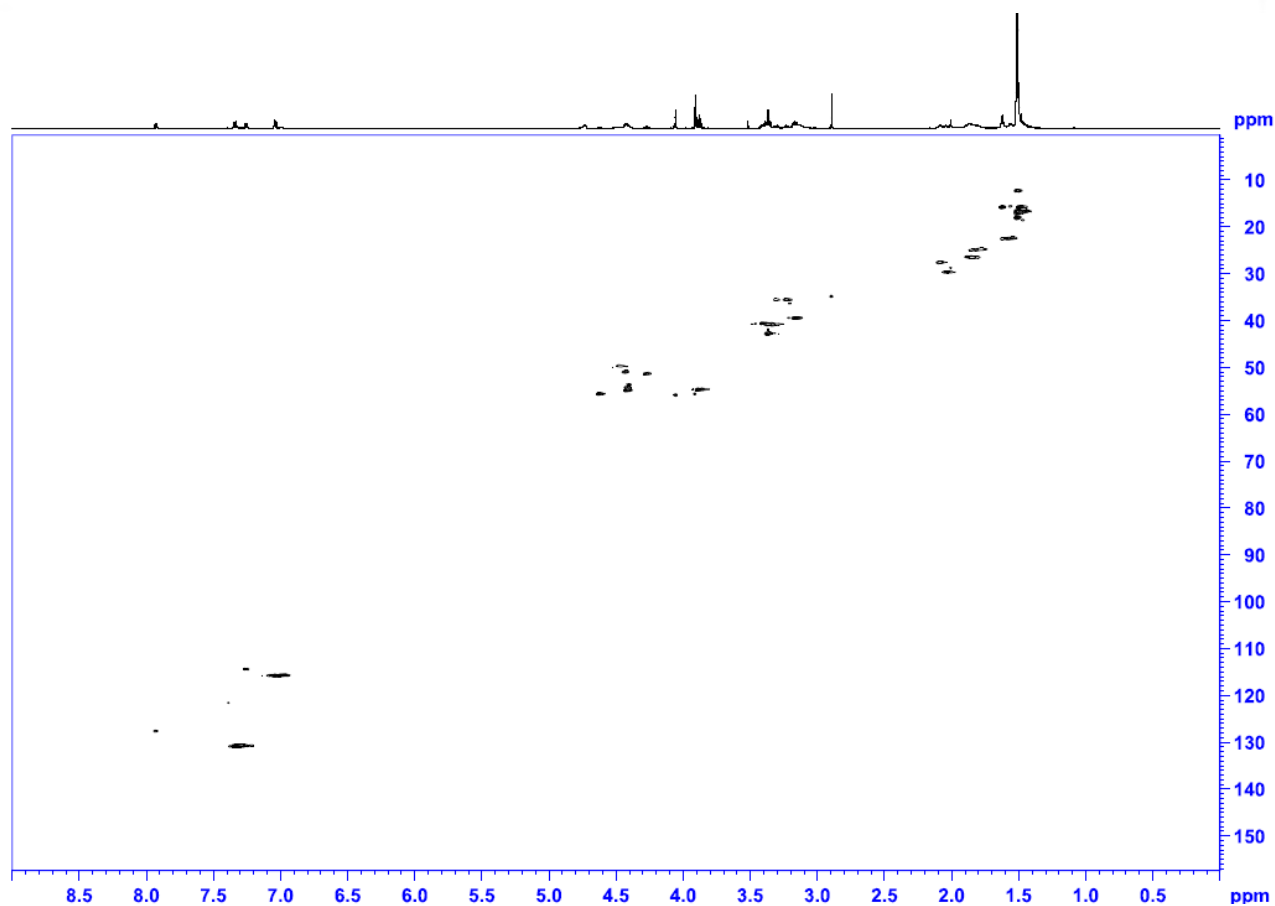

# Supporting Information

## 5.2 CYC: $^1\text{H}$ - $^{13}\text{C}$ HMBC NMR and HRMS

Cyc 5.2 free 2 318K HMBC

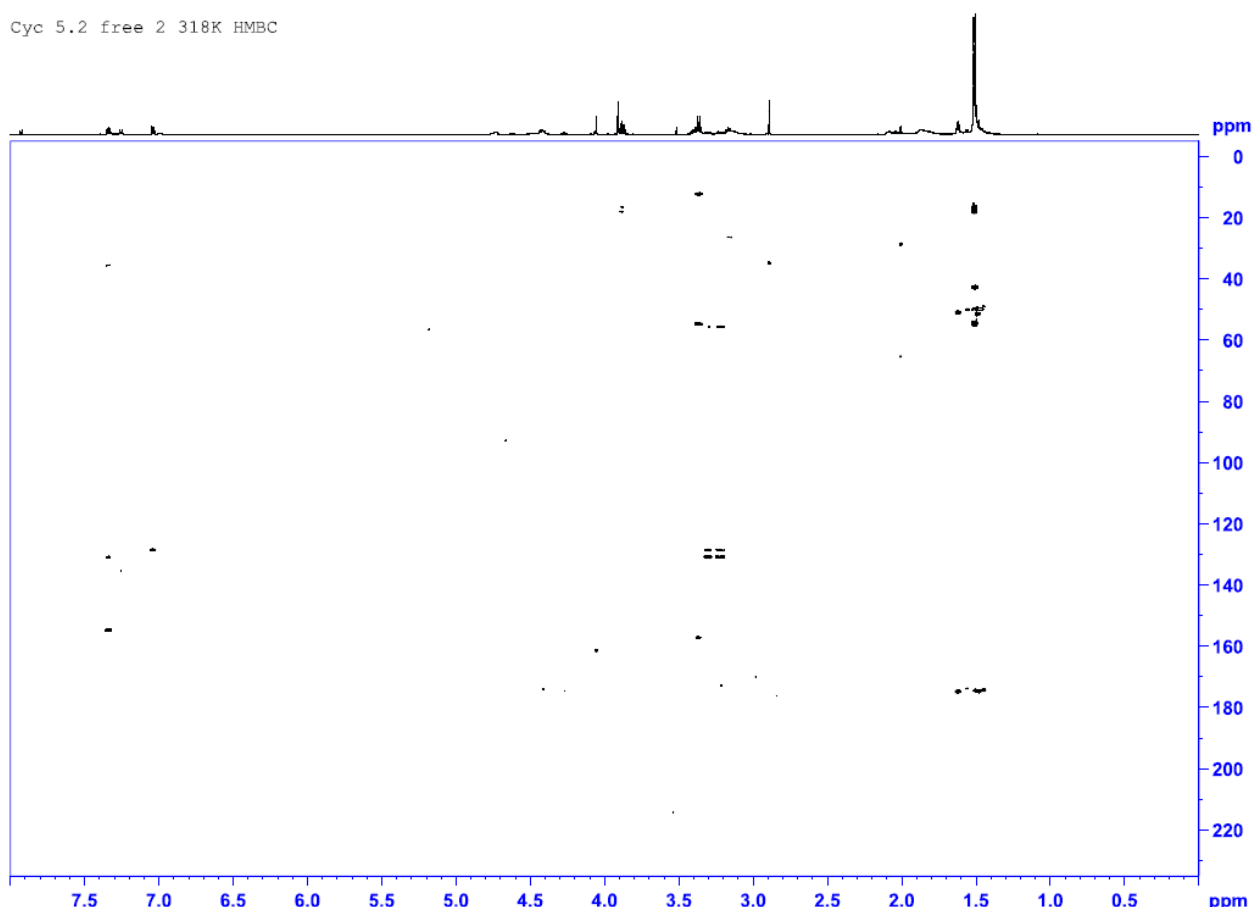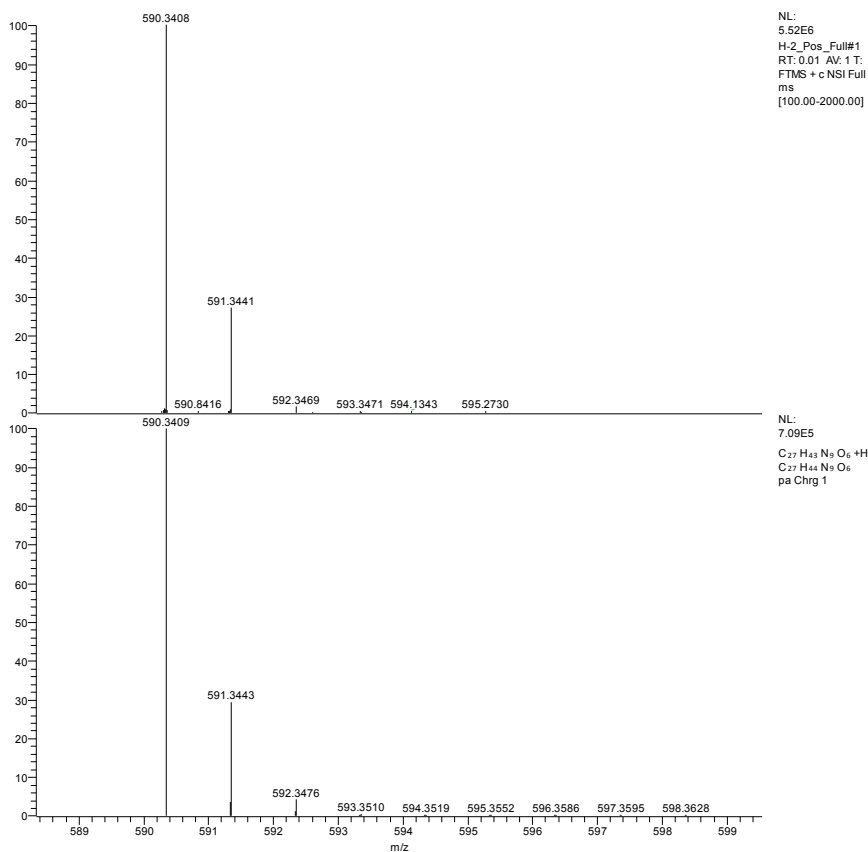

Supporting Information

5.2 CYC: LC/MS

==== Shimadzu LCMSsolution Analysis Report ====

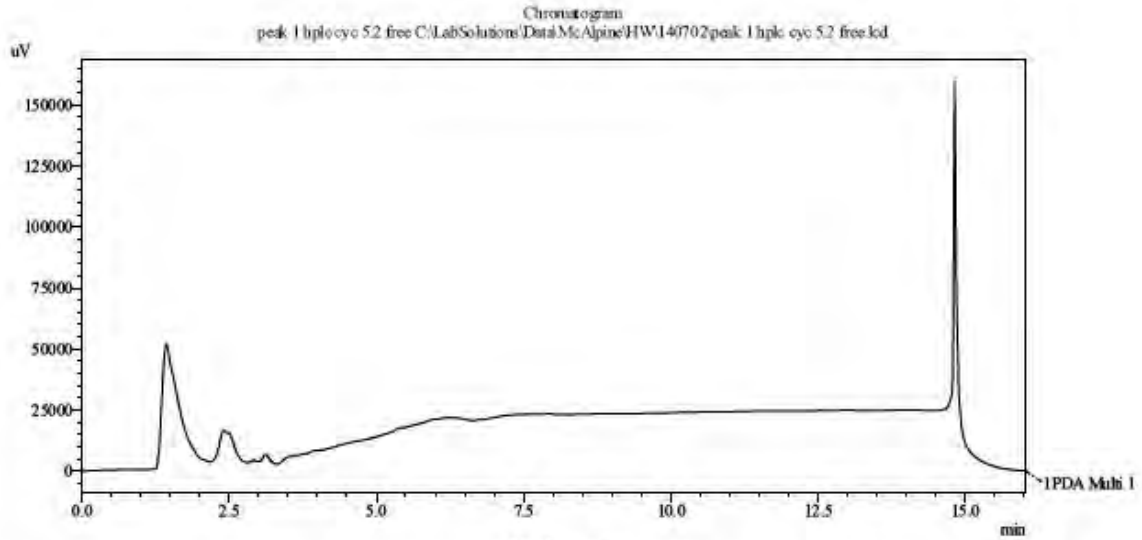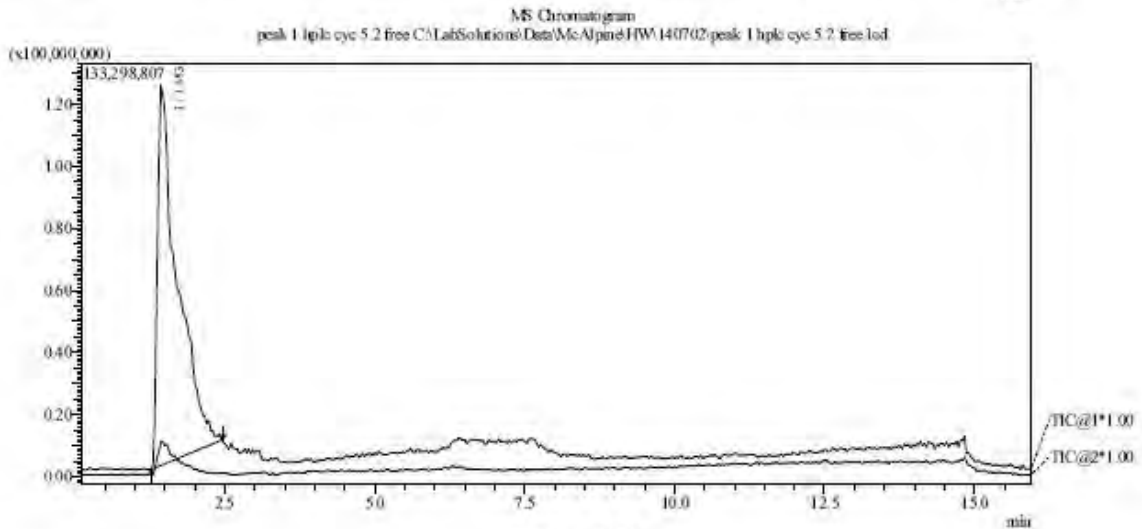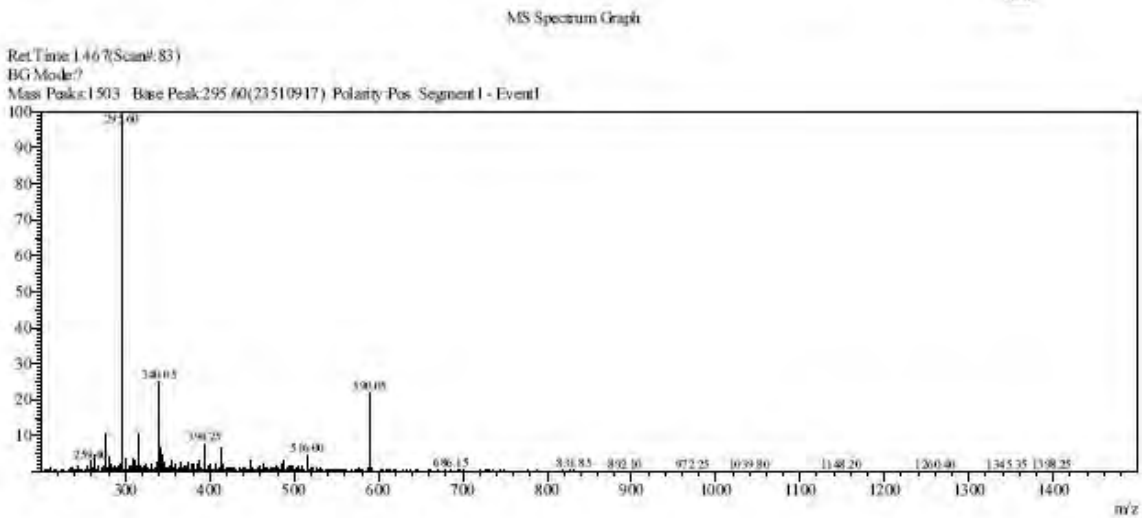

## Supporting Information

### 6.2 LIN: $^1\text{H}$ NMR and $^{13}\text{C}$ NMR

6.2 LIN FREE - D2O - 1H

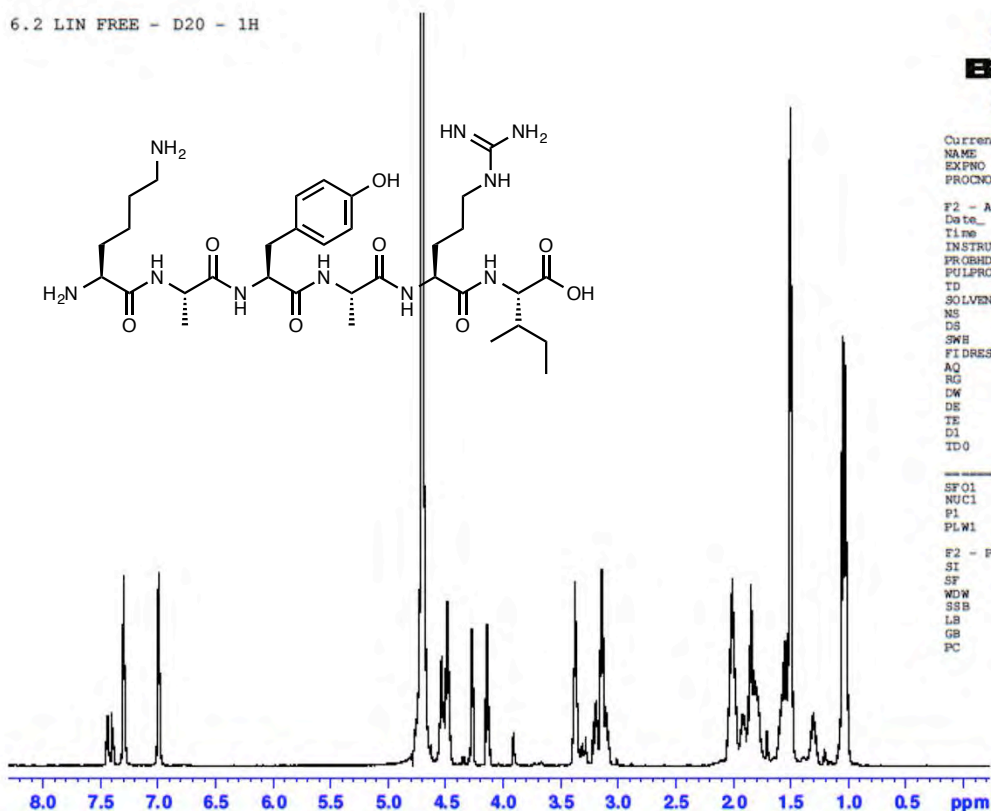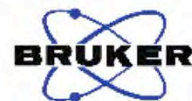

```
Current Data Parameters
NAME      140827-1kb
EXPNO     3
PROCNO    1

F2 - Acquisition Parameters
Date_     20140827
Time      15.20
INSTRUM   spect
PROBHD    5 mm PABBO BB-
PULPROG   zg
TD         65536
SOLVENT   D2O
NS         8
DS         0
SWH        6602.113 Hz
FIDRES     0.100740 Hz
AQ         4.9632597 sec
RG         45.2
DW         75.733 usec
DE         6.51 usec
TE         318.0 K
D1         5.0000000 sec
TD0        1

----- CHANNEL f1 -----
SF01      600.1326982 MHz
NUC1       1H
P1         12.40 usec
PLW1      16.59600067 W

F2 - Processing parameters
SI         131072
SF         600.1300000 MHz
WDW        EM
SSB        0
LB         0.30 Hz
GB         0
PC         1.00
```

6.2 LIN FREE - D2O - 13C

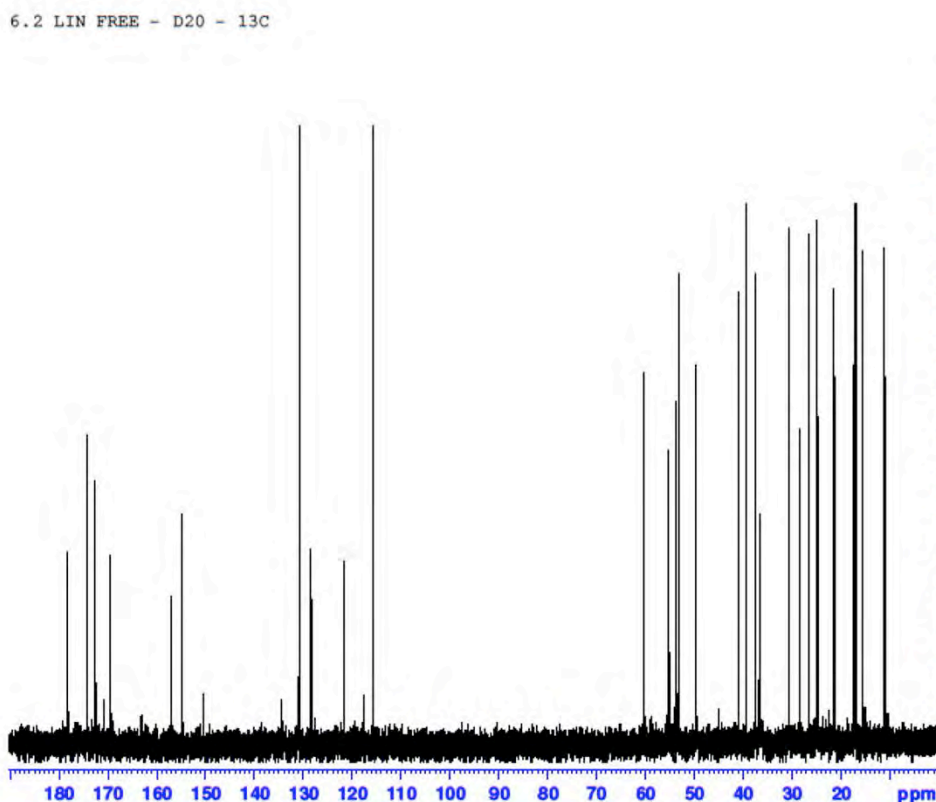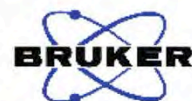

```
Current Data Parameters
NAME      140910-1kb
EXPNO     2
PROCNO    1

F2 - Acquisition Parameters
Date_     20140910
Time      14.57
INSTRUM   spect
PROBHD    5 mm PABBO BB-
PULPROG   zgpg30
TD         65536
SOLVENT   D2O
NS         2777
DS         4
SWH        30241.936 Hz
FIDRES     0.461455 Hz
AQ         1.0835285 sec
RG         2050
DW         16.533 usec
DE         7.01 usec
TE         318.0 K
D1         2.0000000 sec
D11        0.0300000 sec
TD0        1

----- CHANNEL f1 -----
SF01      150.9163903 MHz
NUC1       13C
P1         11.90 usec
PLW1      115.09999847 W

----- CHANNEL f2 -----
SF02      600.1324005 MHz
NUC2       1H
CPDPRG2   [2 bi_waltz65_256
PCPD2      70.00 usec
PLW2      16.59600067 W
PLW12     0.52078003 W
PLW13     0.25518000 W

F2 - Processing parameters
SI         32768
SF         150.9028090 MHz
WDW        EM
SSB        0
LB         1.00 Hz
GB         0
PC         1.40
```



Supporting Information

6.2 LIN: <sup>1</sup>H-<sup>13</sup>C HSQC NMR and <sup>1</sup>H-<sup>13</sup>C HMBC NMR

6.2 LIN FREE - D2O - HSQC

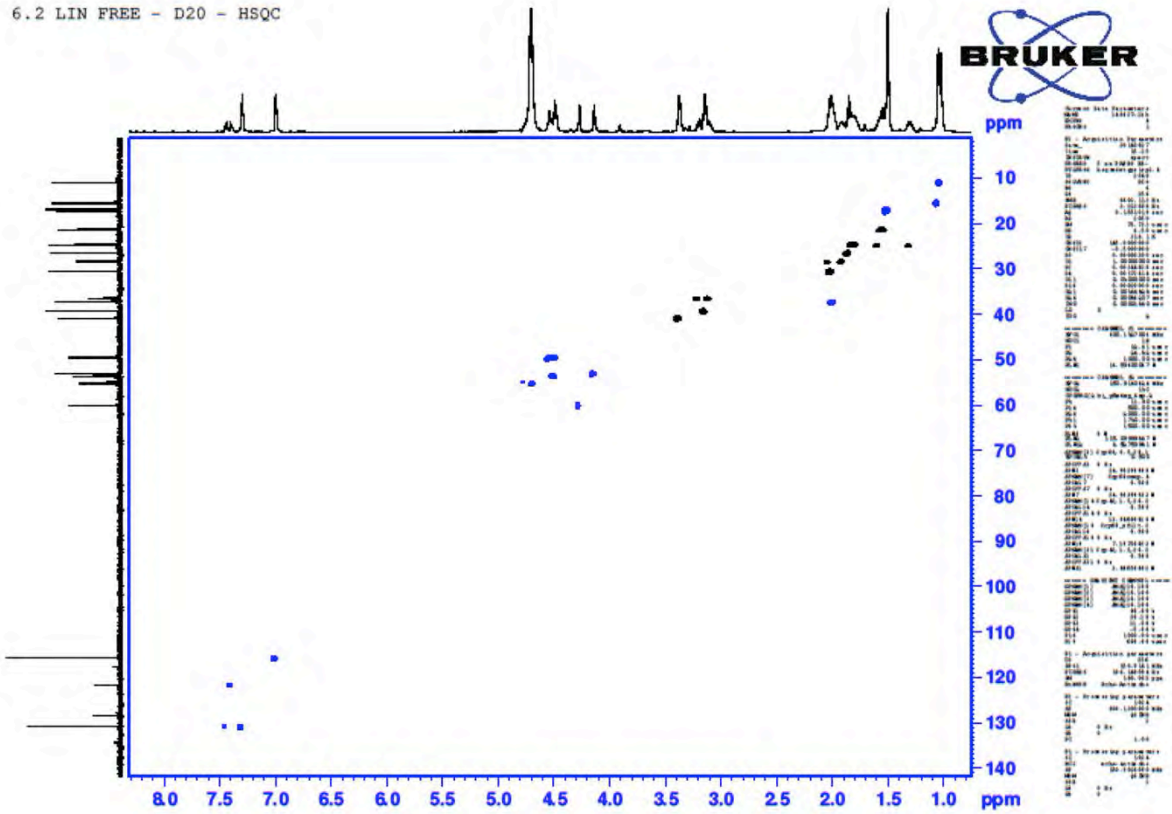

6.2 LIN FREE - D2O - HMBC

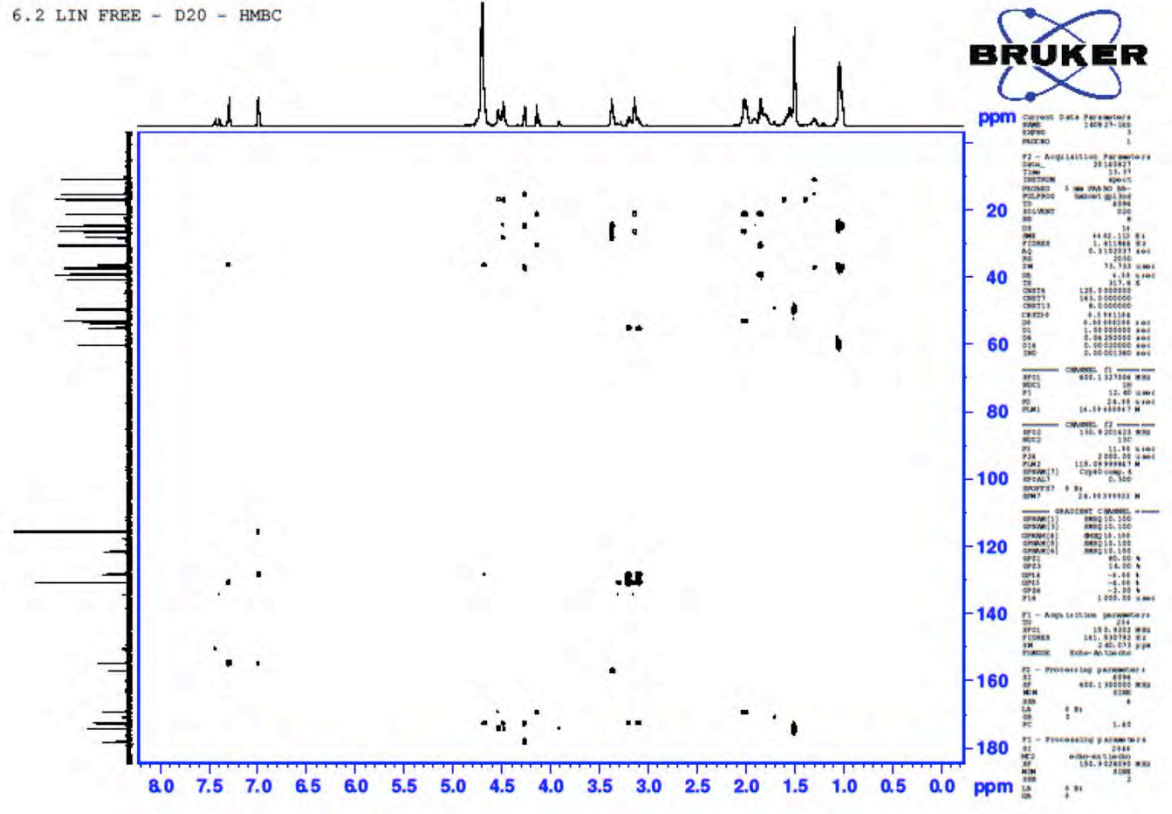

# Supporting Information

## 6.2 LIN: $^1\text{H}$ - $^1\text{H}$ COSY NMR and HRMS

6.2 LIN FREE - D2O - COSY

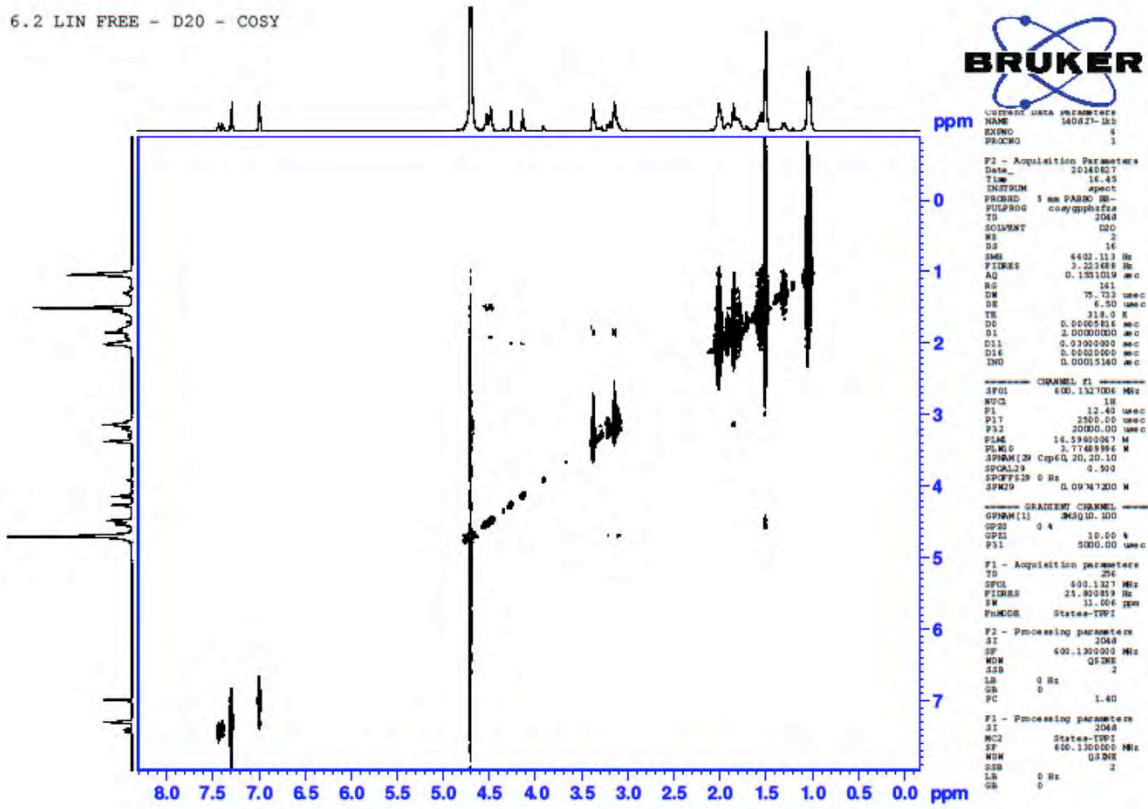

L-9\_Pos\_Full #6 RT: 0.30 AV: 1 NL: 7.73E7  
 T: FTMS + c NSI Full ms [50.00-2000.00]

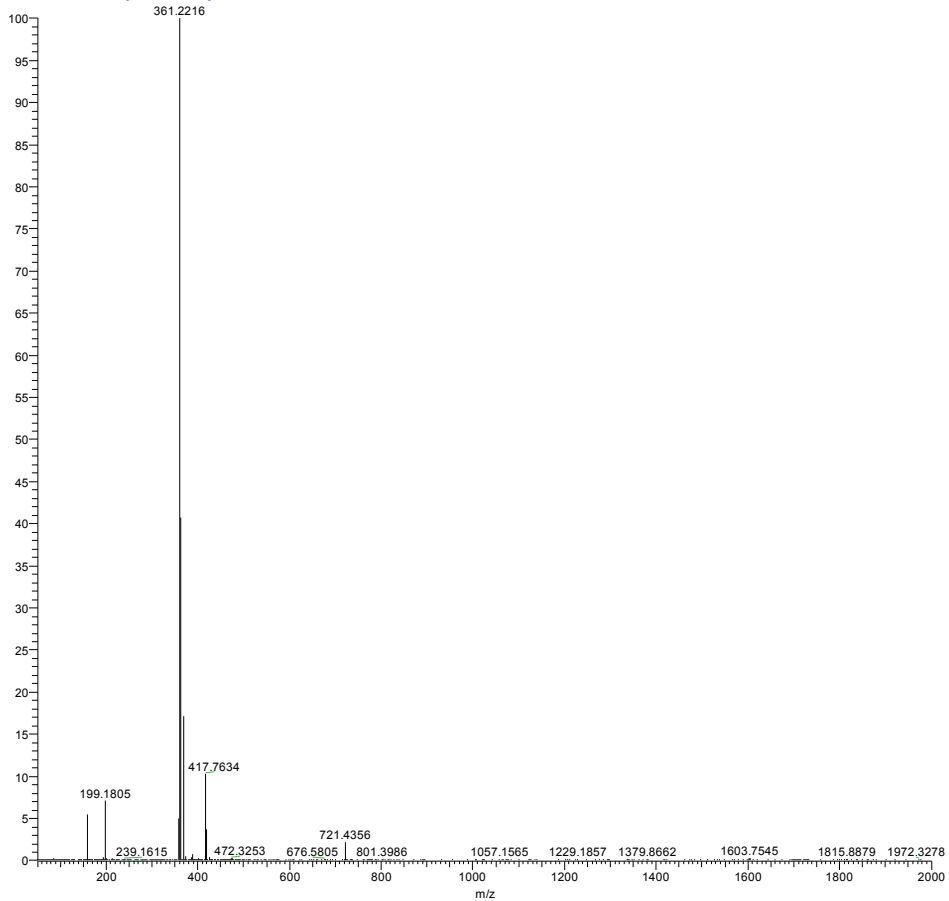

Supporting Information

6.2 LIN: LC/MS

==== Shimadzu LCMSsolution Analysis Report ====

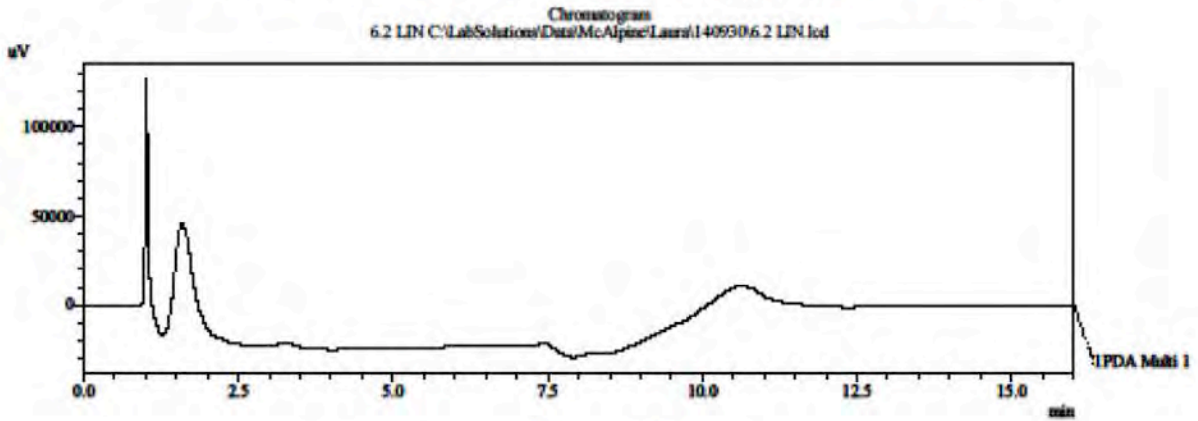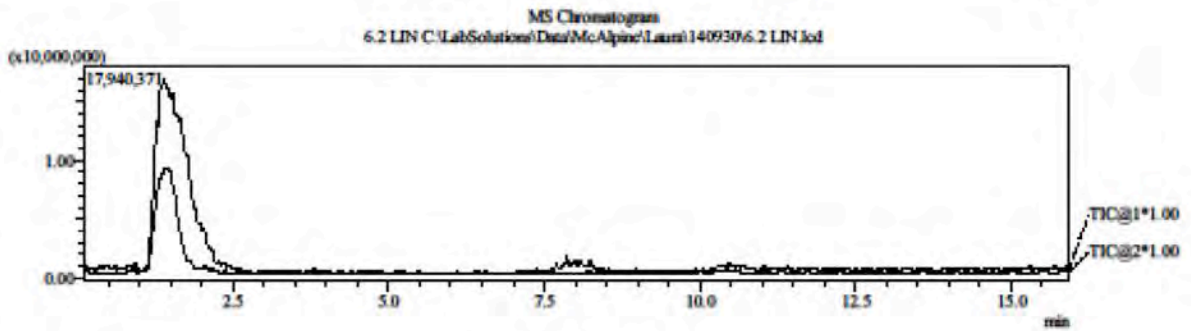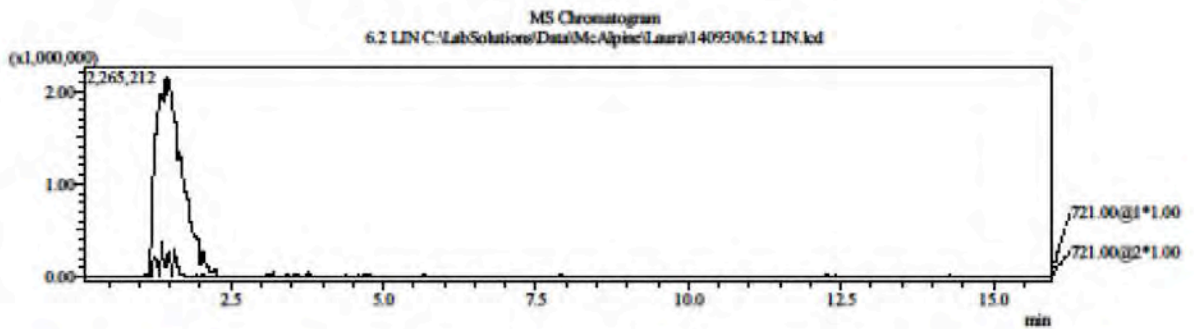

MS Spectrum Graph

#1 Ret Time: Single 1.433(Scan#81)

BG Mode:None

Mass Peaks:1394 Base Peak:361.10(2748606) Polarity:Pos Segment1 - Event1

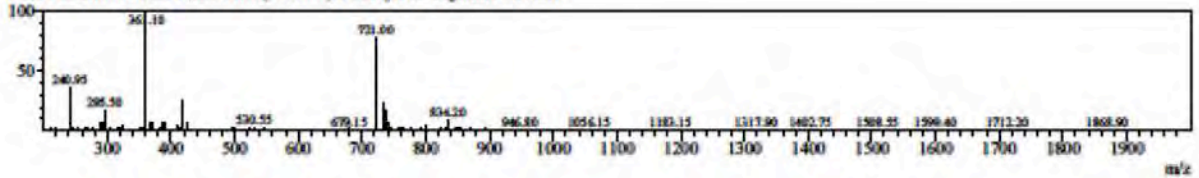

MS Spectrum Graph

#2 Ret Time: Single 1.450(Scan#82)

BG Mode:None

Mass Peaks:1371 Base Peak:718.90(3328614) Polarity:Neg Segment1 - Event2

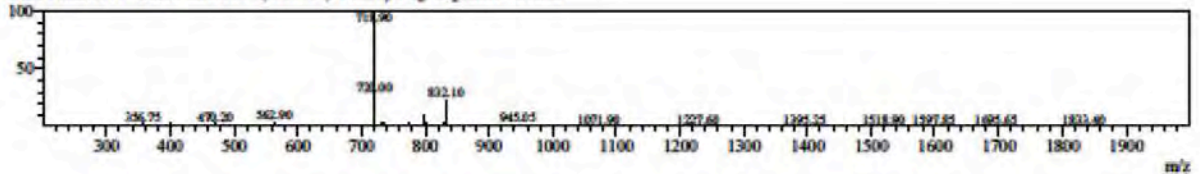

# Supporting Information

## 6.2 CYC: <sup>1</sup>H NMR and <sup>13</sup>C NMR

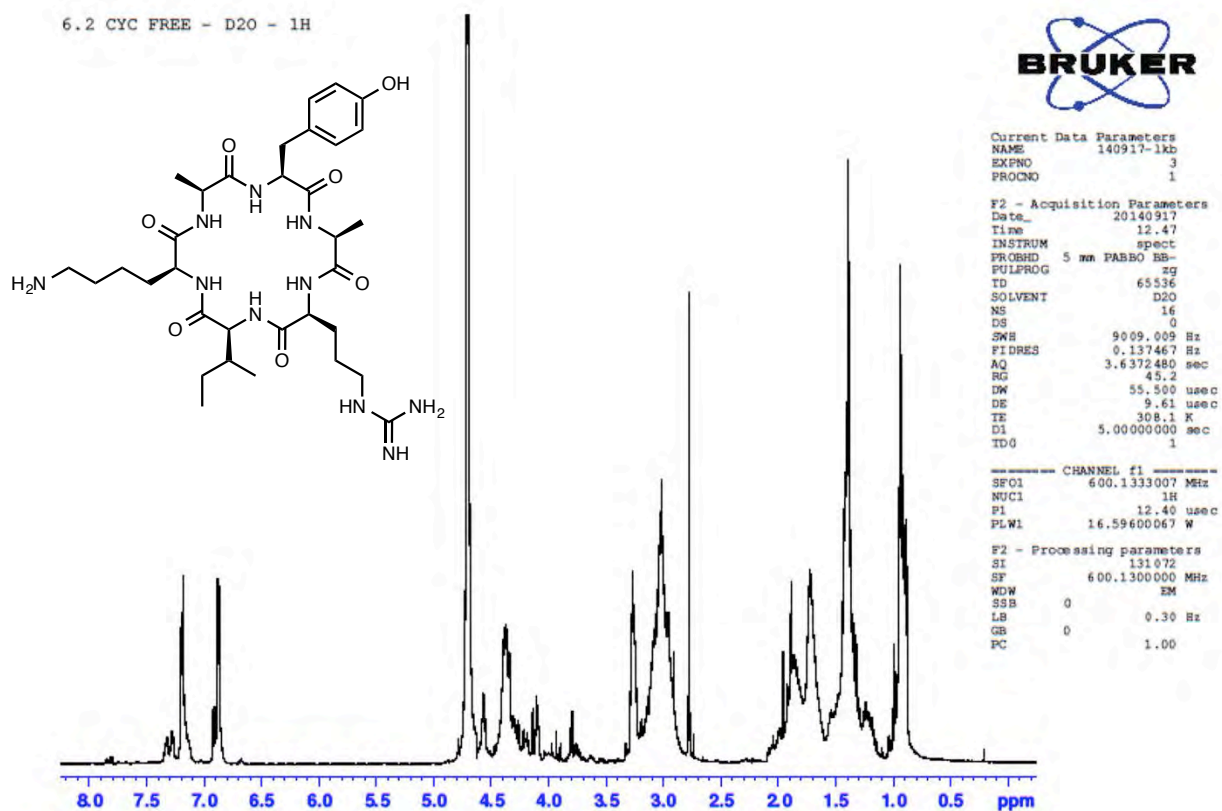

## 6.2 CYC FREE - D2O - 13C

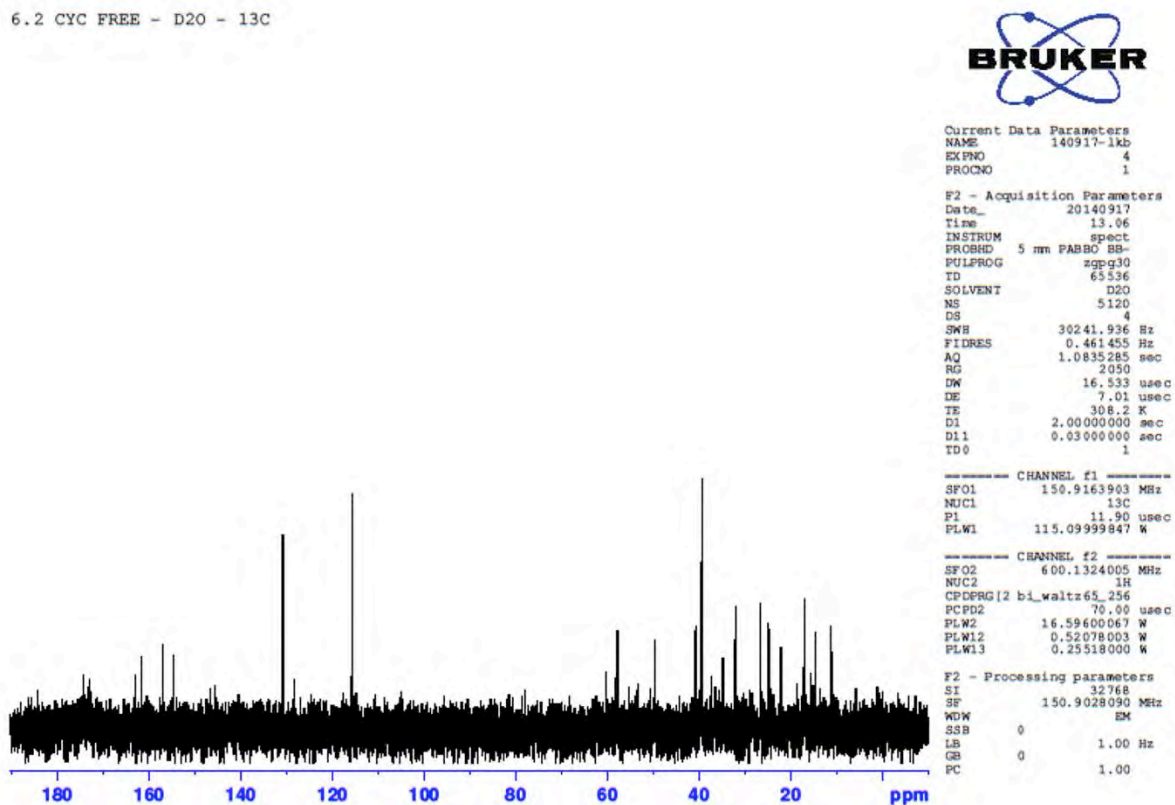

Supporting Information

6.2 CYC:  $^1\text{H}$ - $^{13}\text{C}$  HSQC NMR and  $^1\text{H}$ - $^{13}\text{C}$  HMBC NMR

6.2 CYC FREE - D2O - HSQC

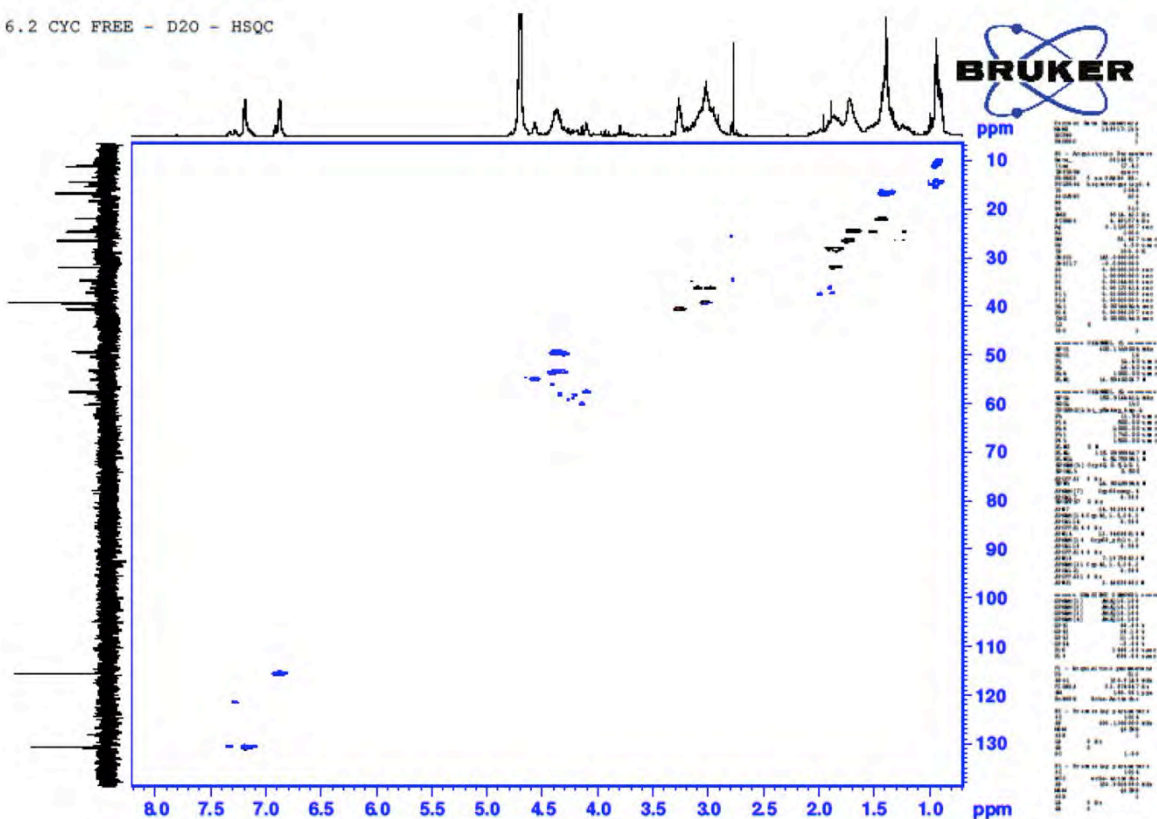

6.2 CYC FREE - D2O - HMBC

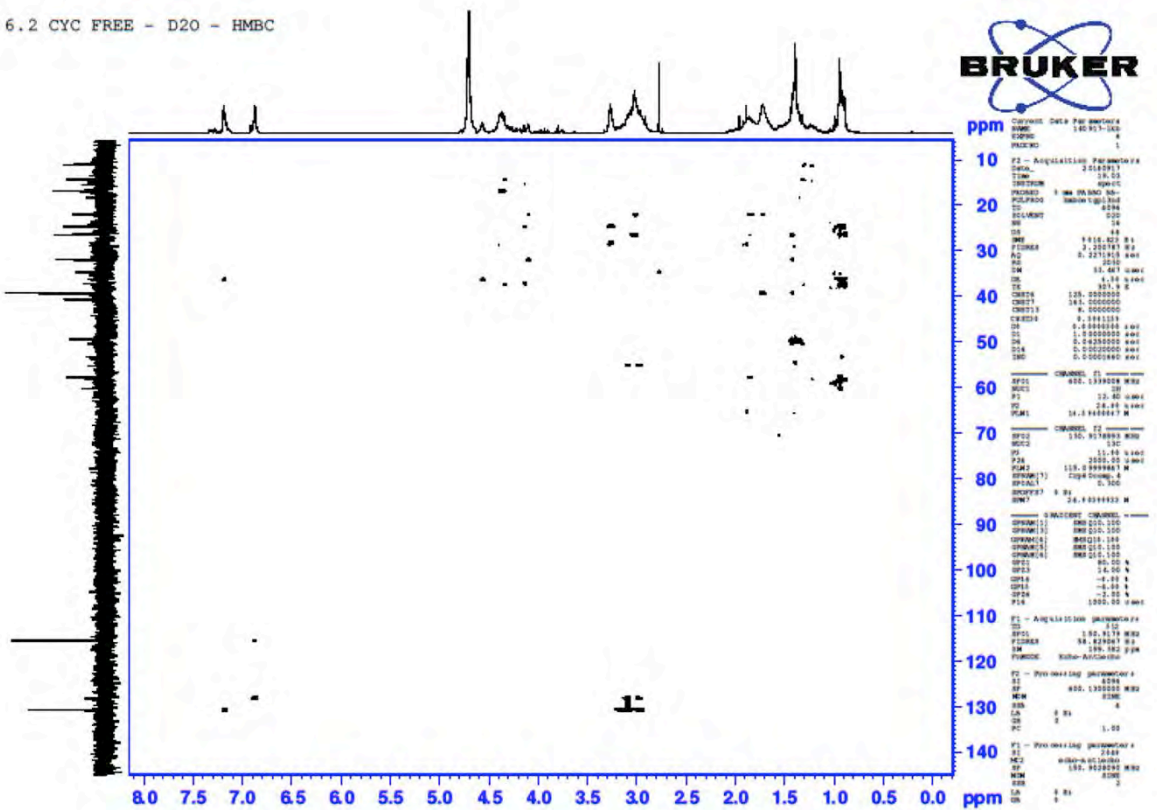

## Supporting Information

### 6.2 CYC: $^1\text{H}$ - $^1\text{H}$ COSY NMR and HRMS

6.2 CYC FREE - D2O - COSY

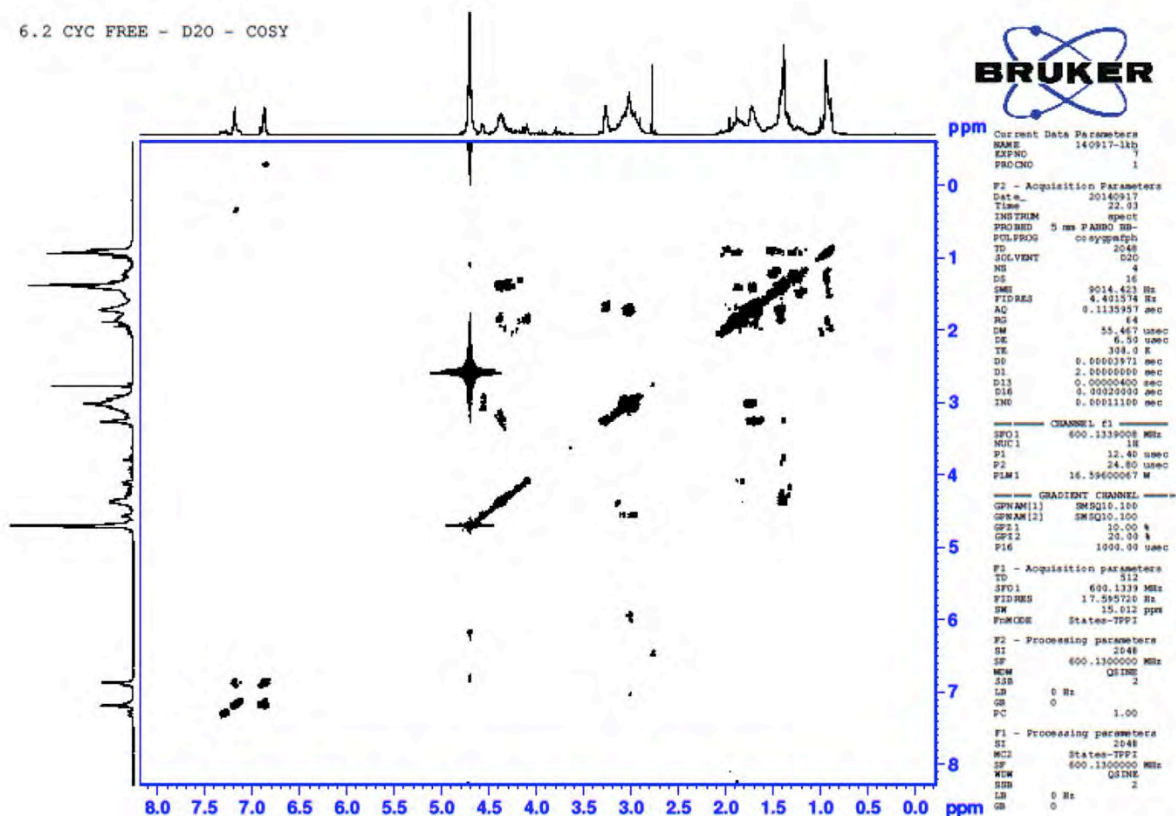

L-10\_Pos\_Full#7 RT: 0.34 AV: 1 NL: 2.41E7  
 T: FTMS + c NSI Full ms [50.00-2000.00]

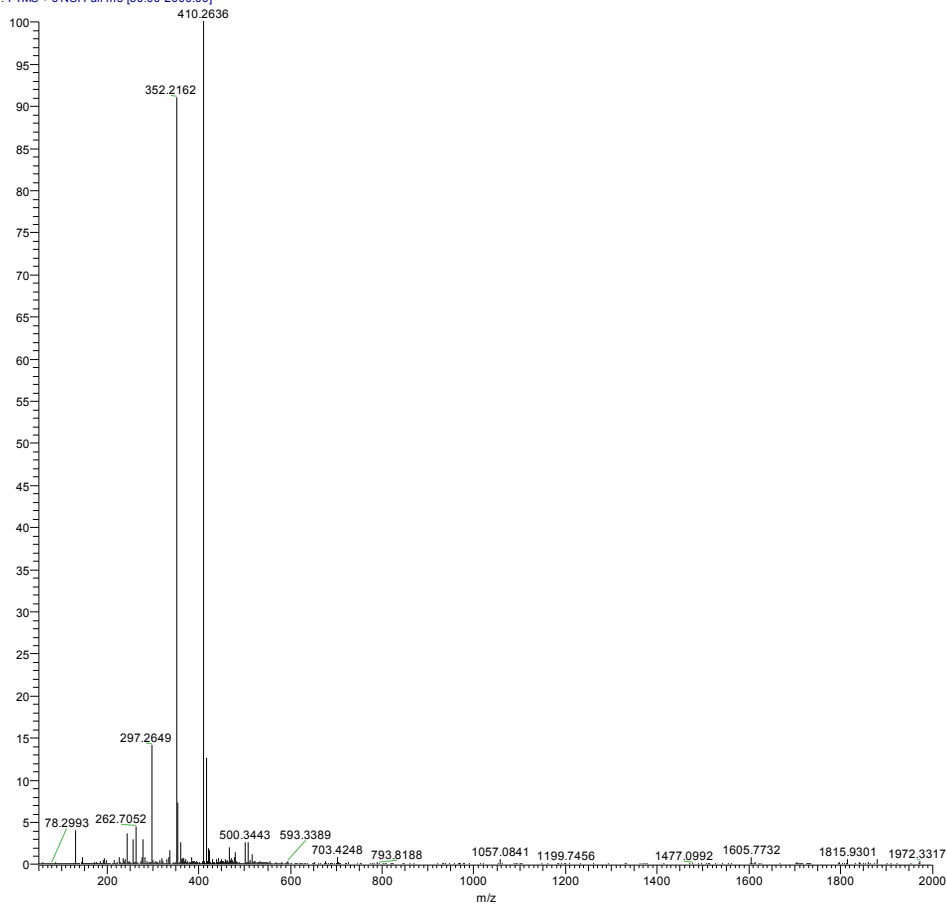

6.2 CYC: LC/MS

==== Shimadzu LCMSSolution Analysis Report ====

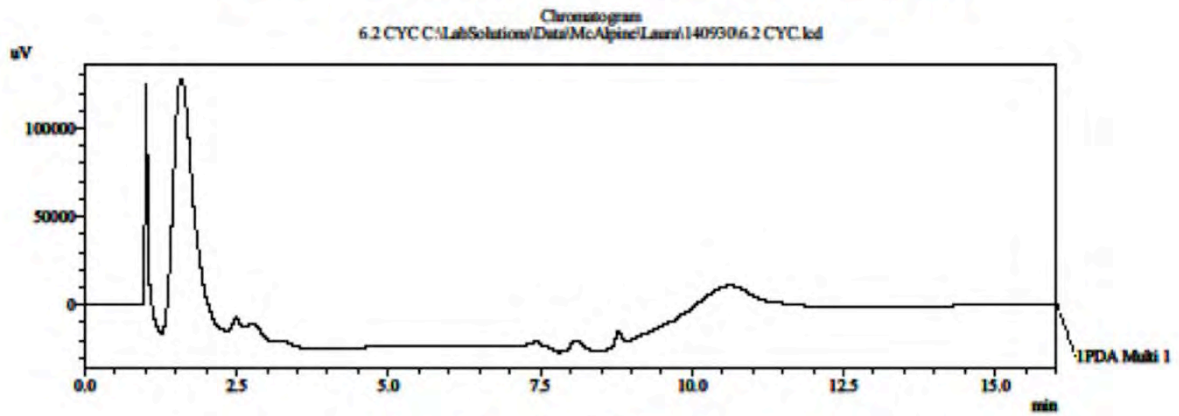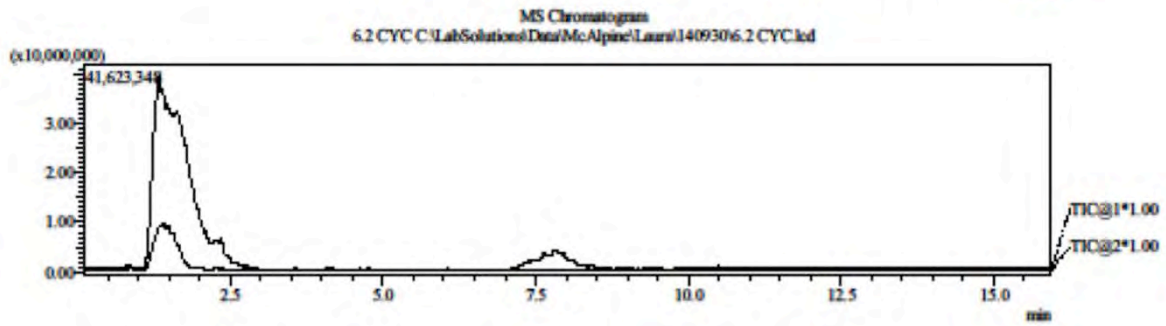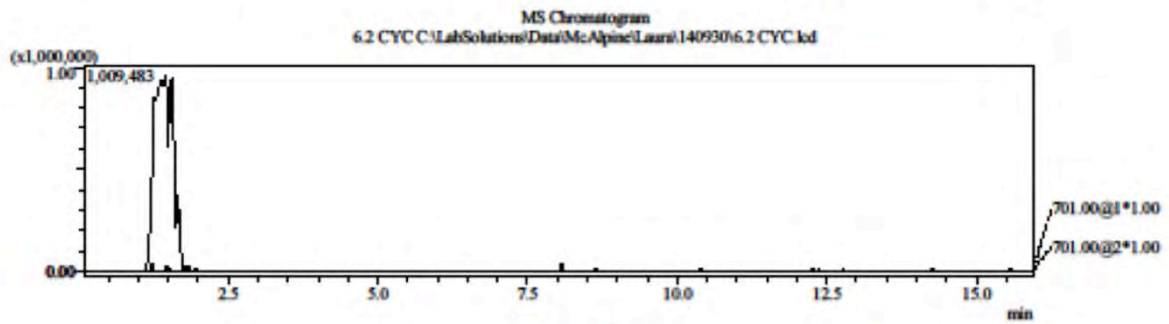

MS Spectrum Graph

#1 Ret.Time:Single 1.600(Scan#91)  
BG Mode:None  
Mass Peaks:1438 Base Peak:273.65(2246114) Polarity:Pos Segment1 - Event1

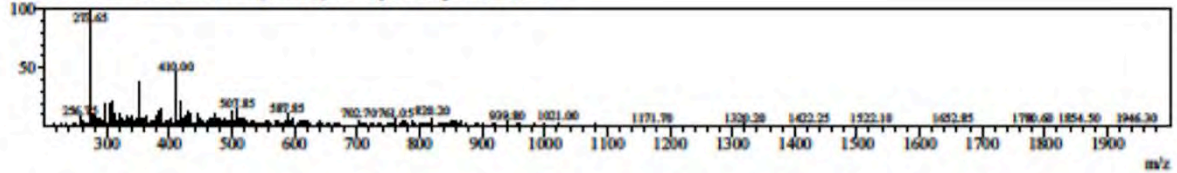

MS Spectrum Graph

#2 Ret.Time:Single 1.617(Scan#92)  
BG Mode:None  
Mass Peaks:1401 Base Peak:700.90(579864) Polarity:Neg Segment1 - Event2

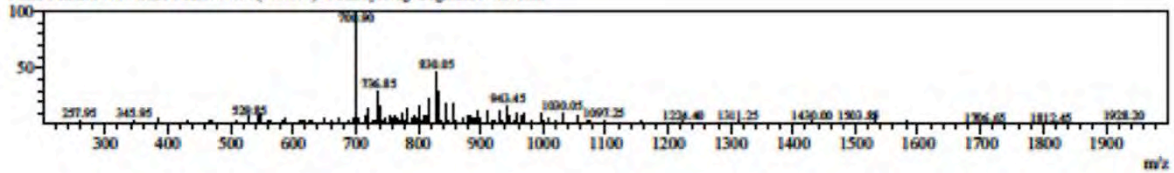

# Supporting Information

## 7.2 LIN: <sup>1</sup>H NMR and <sup>13</sup>C NMR

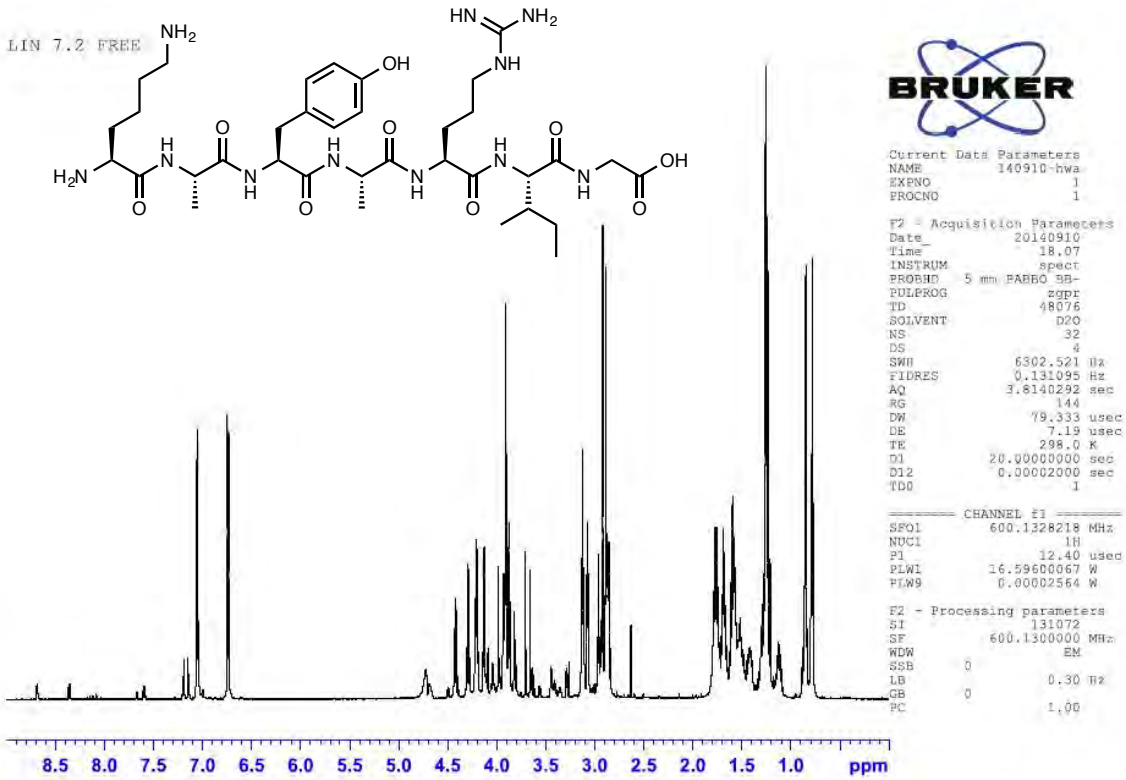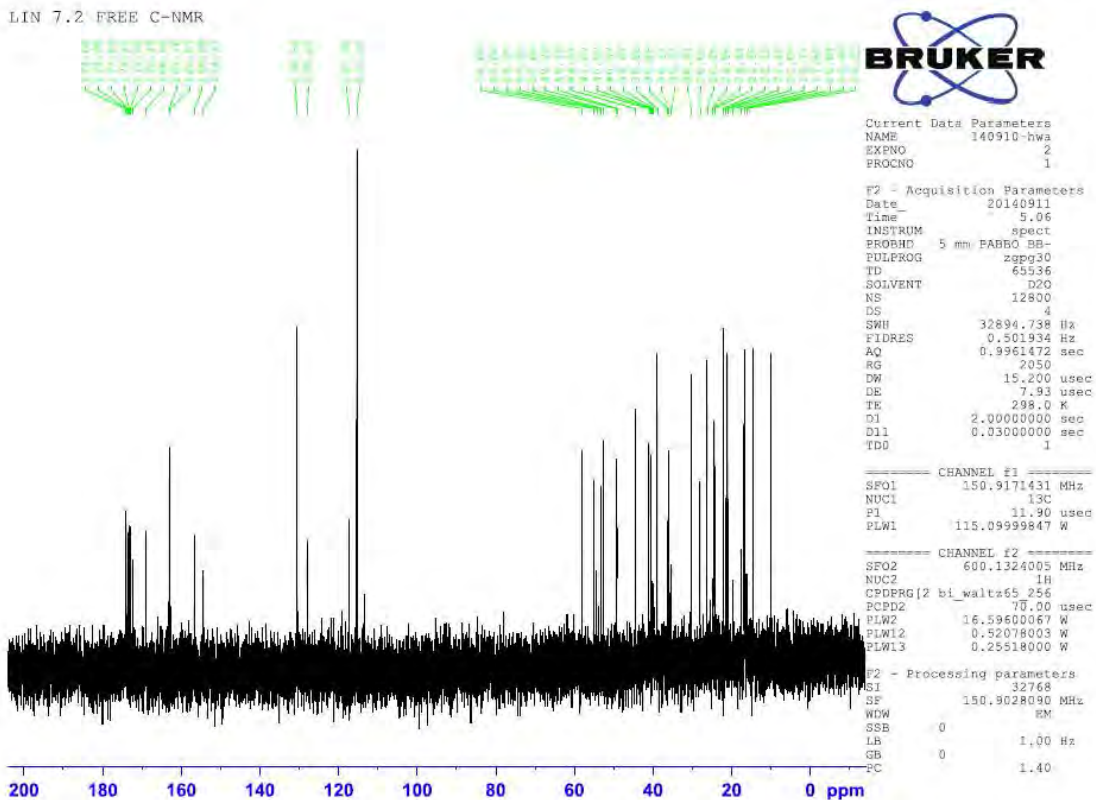



# Supporting Information

## 7.2 LIN: HRMS

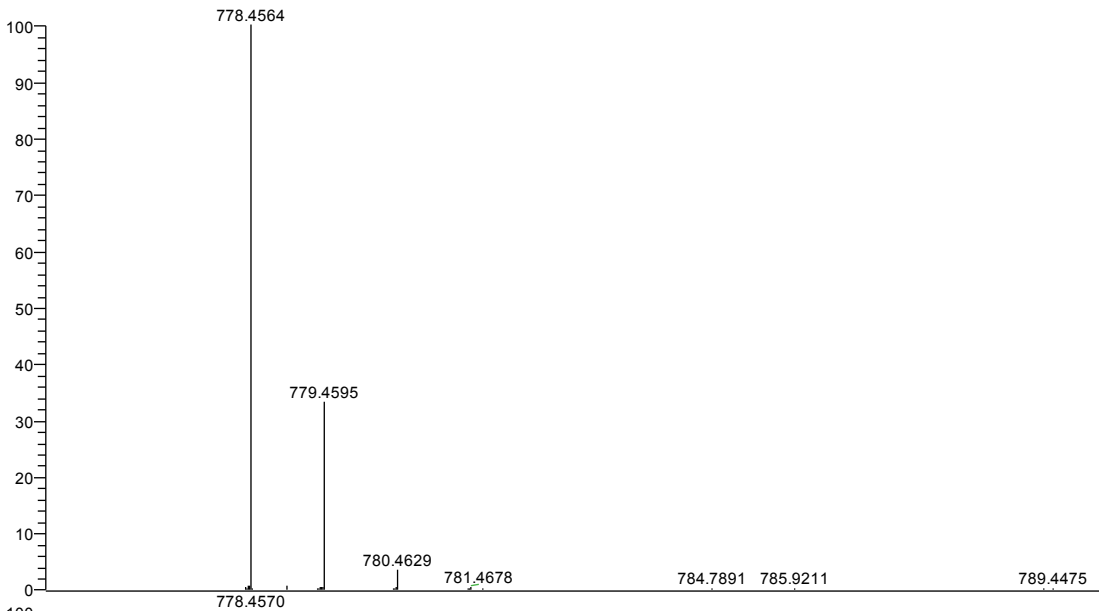

NL:  
7.46E6  
H-3\_Pos\_Full#6  
RT: 0.30 AV: 1 T:  
FTMS + c NSI Full  
ms  
[100.00-2000.00]

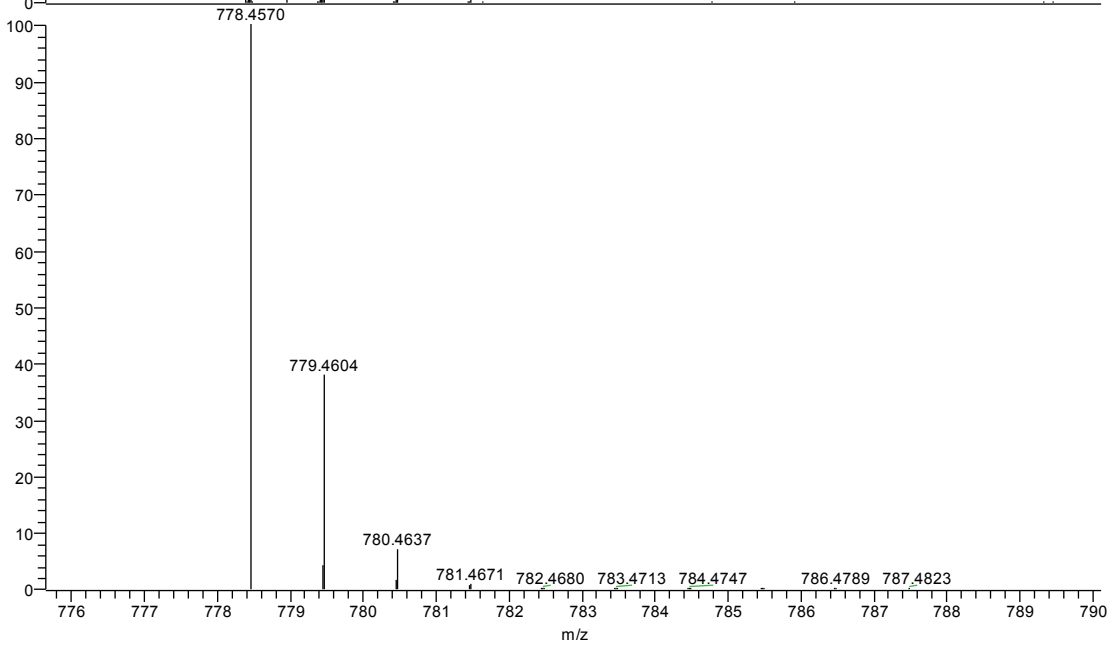

NL:  
6.40E5  
C<sub>35</sub>H<sub>59</sub>N<sub>11</sub>O<sub>9</sub>+H:  
C<sub>35</sub>H<sub>60</sub>N<sub>11</sub>O<sub>9</sub>  
pa Chrg 1

Supporting Information

7.2 LIN: LC/MS

==== Shimadzu LCMSsolution Analysis Report ====

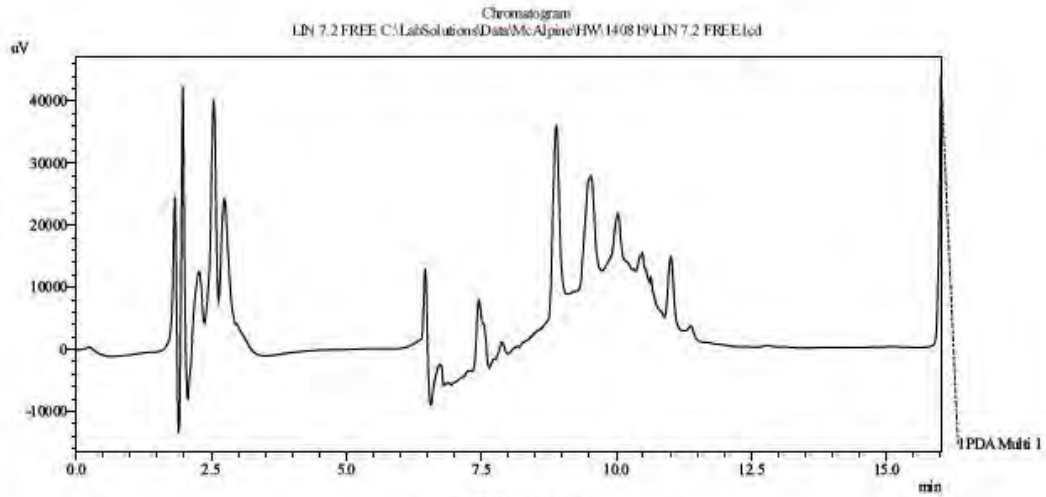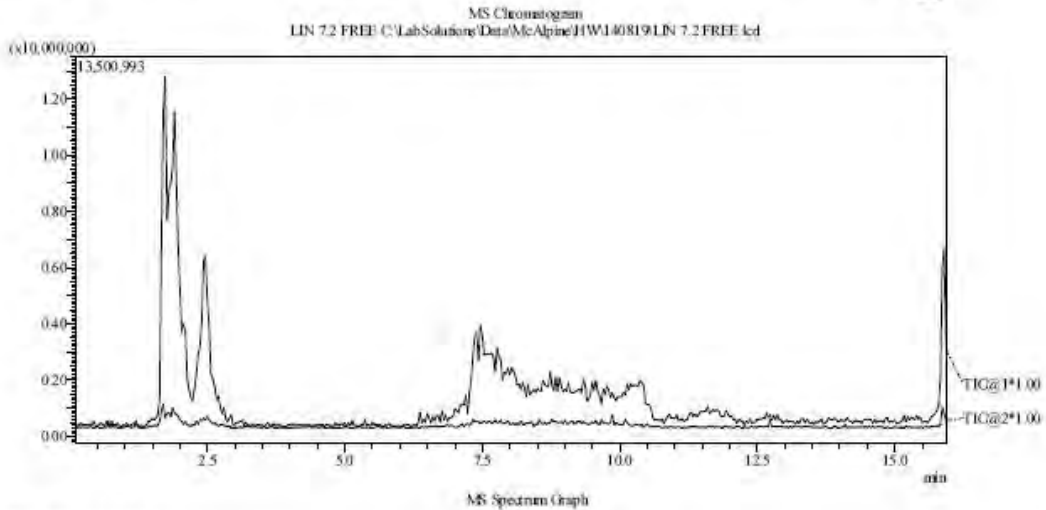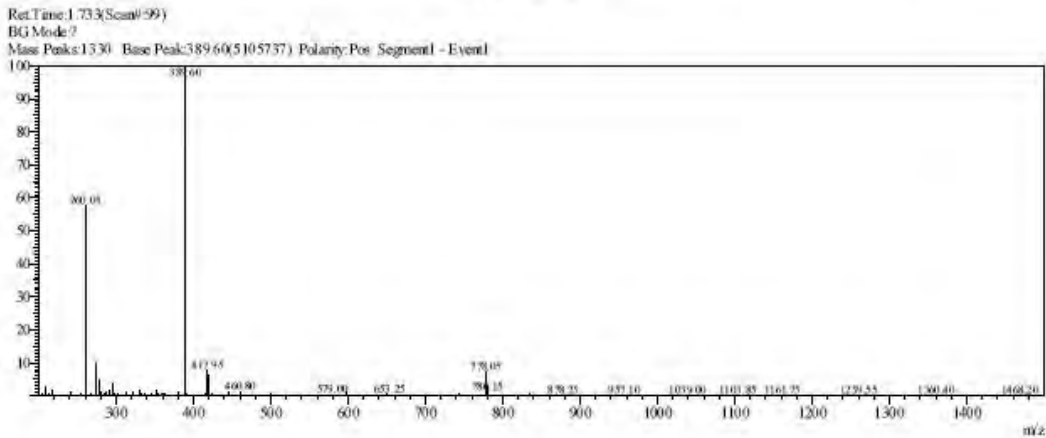

## Supporting Information

### 7.2 CYC: $^1\text{H}$ NMR and $^1\text{H}$ - $^{13}\text{C}$ HSQC NMR

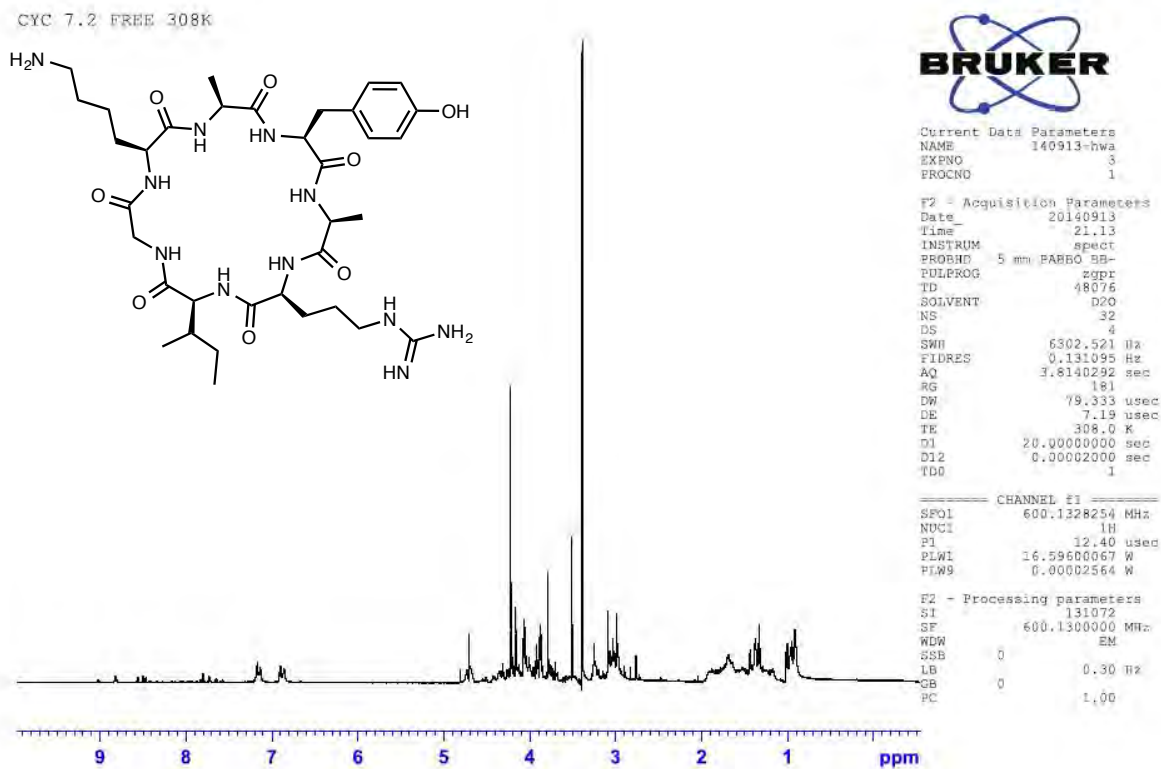

Cyc 7.2 free  
1h13c.hsqc.aded D2O F:\ iconnmr 6

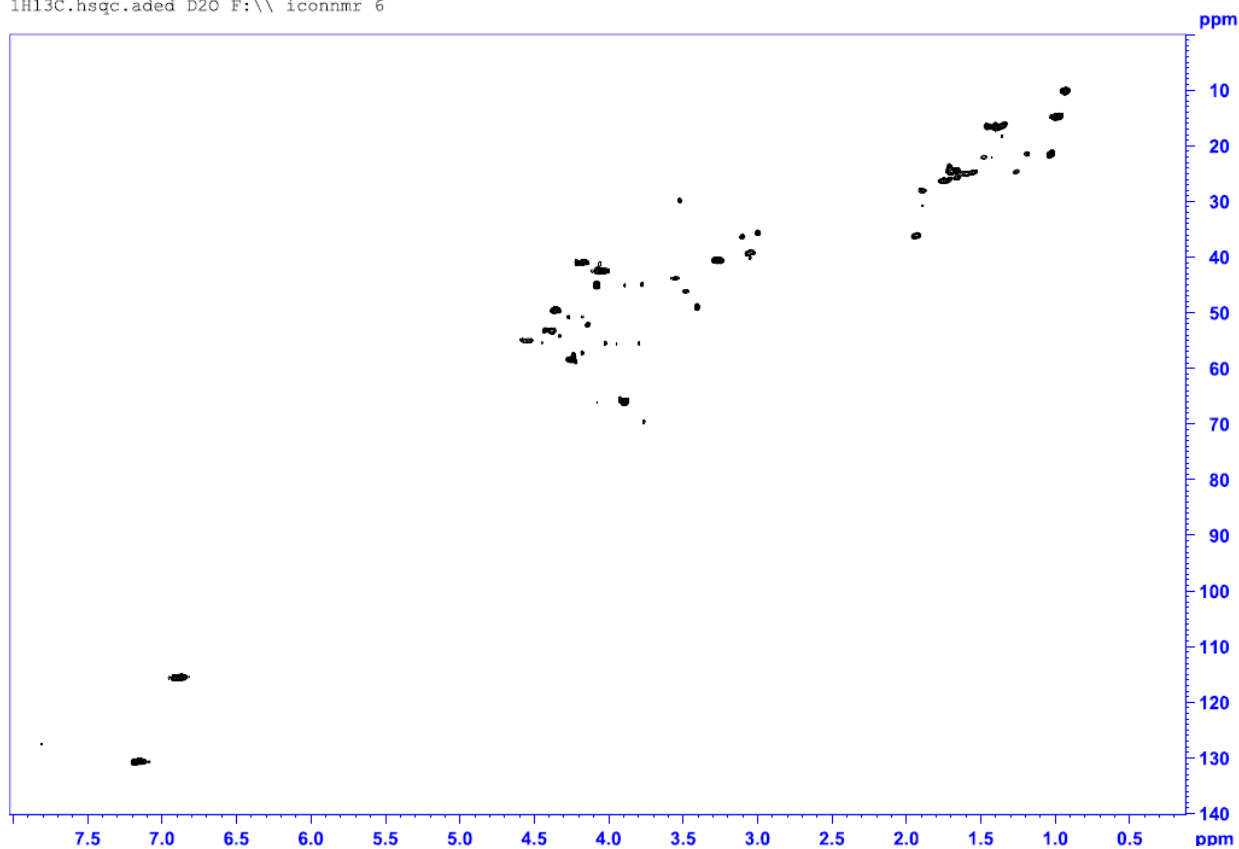

# Supporting Information

## 7.2 CYC: $^1\text{H}$ - $^{13}\text{C}$ HMBC NMR and HRMS

Supervisor McAlpine  
Cyc 7.2 free  
1H13C.hmbc D2O F:\ iconnmr 6

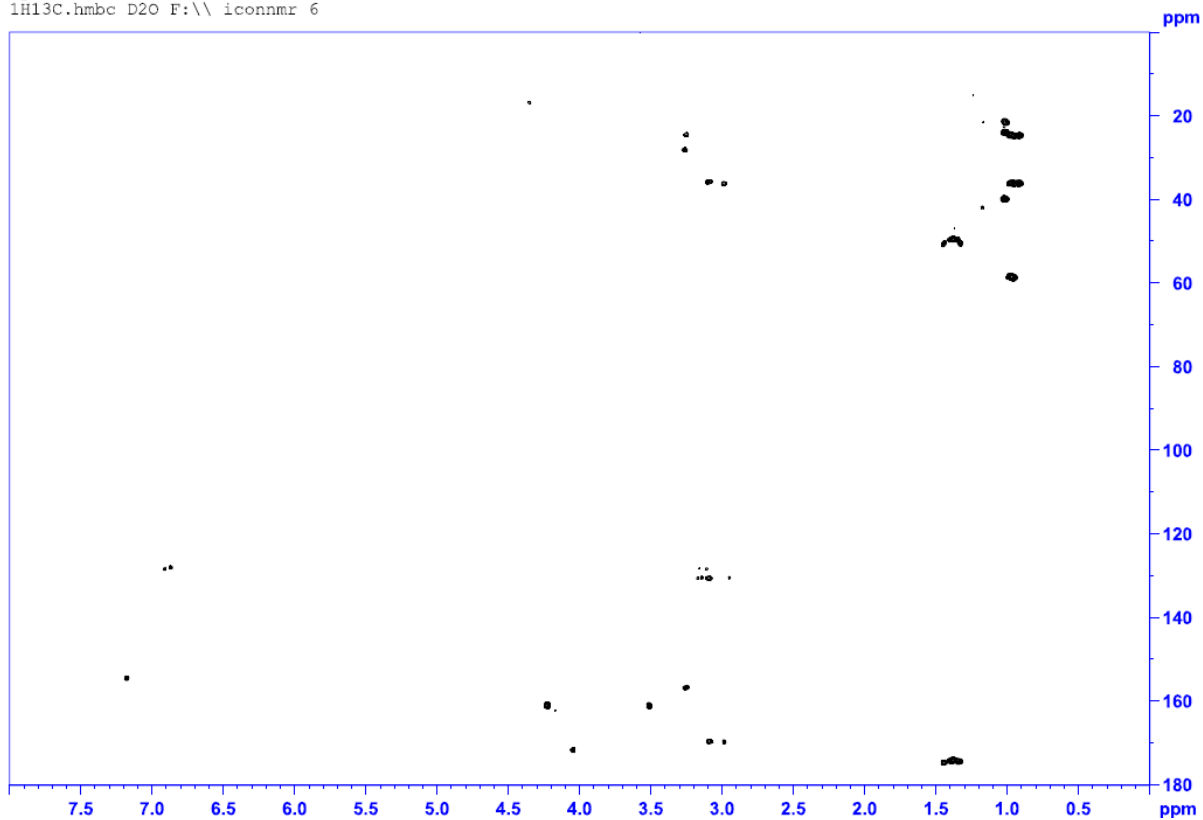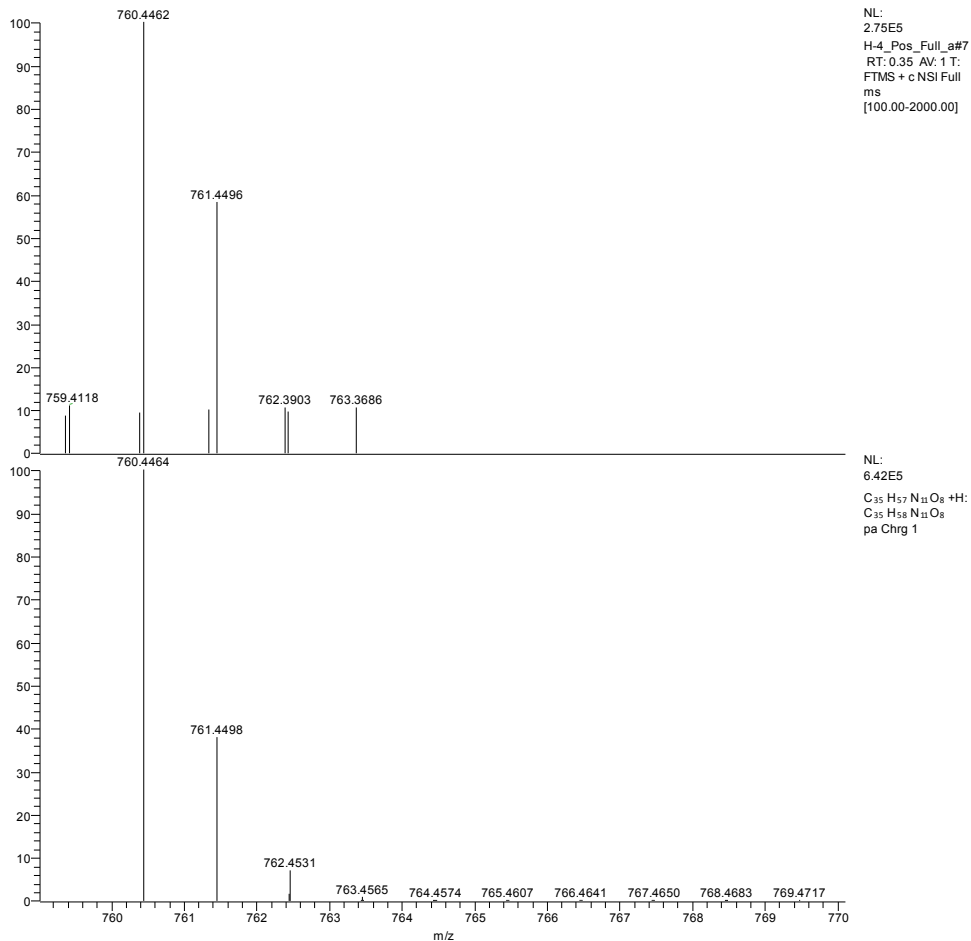

Supporting Information

7.2 CYC: LC/MS

==== Shimadzu LCMSsolution Analysis Report ====

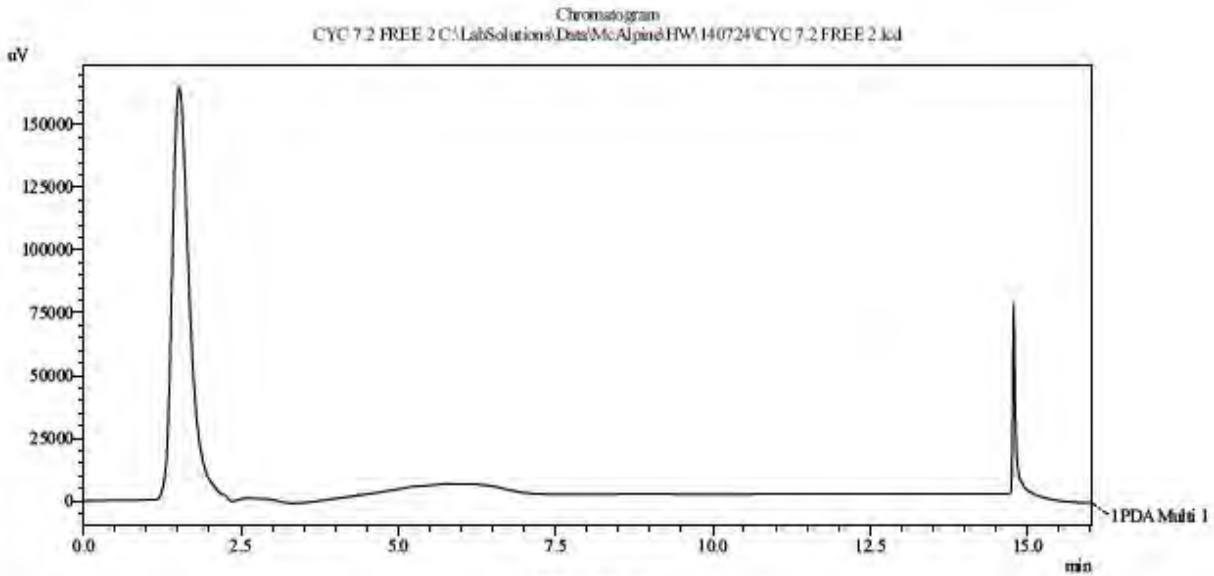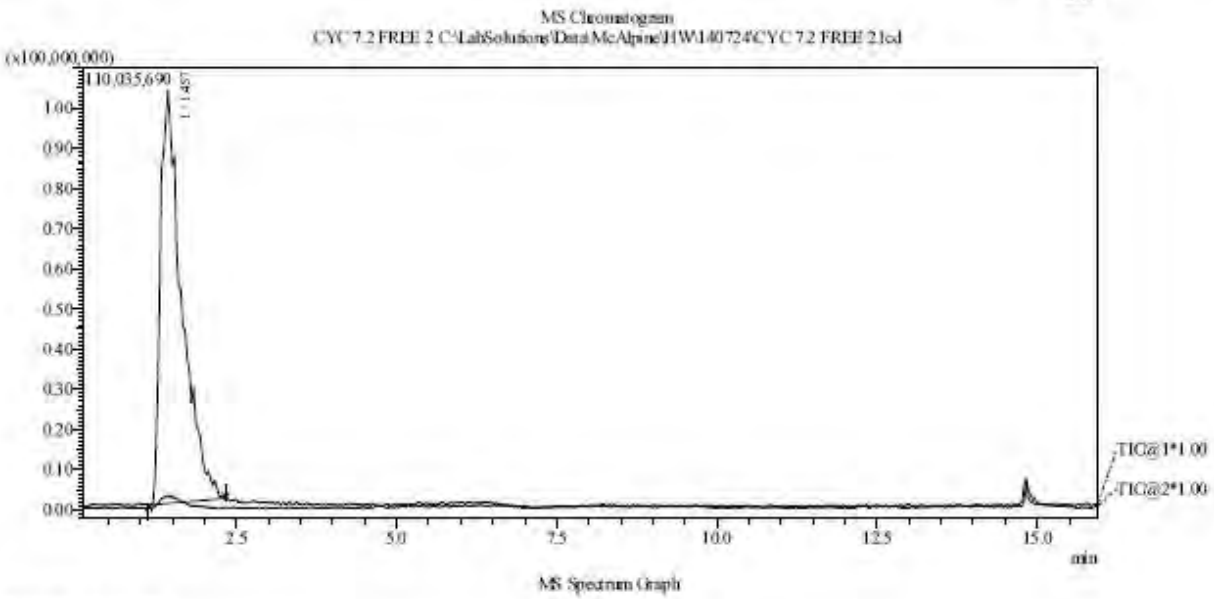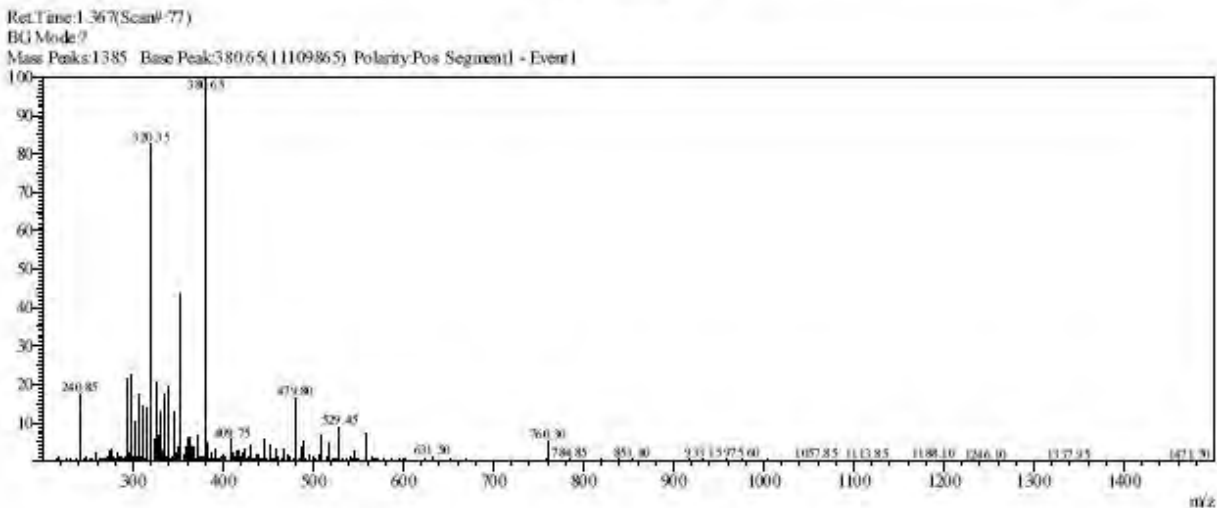

# Supporting Information

## 8.2 LIN: $^1\text{H}$ NMR and $^{13}\text{C}$ NMR

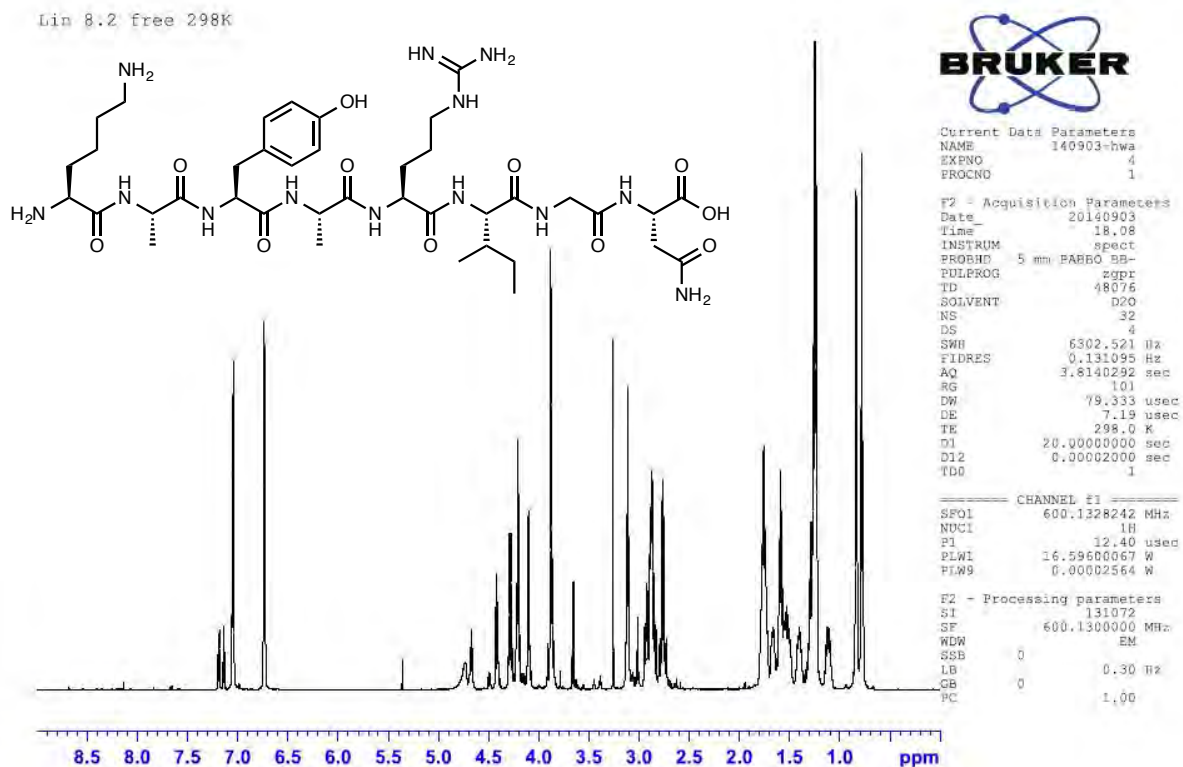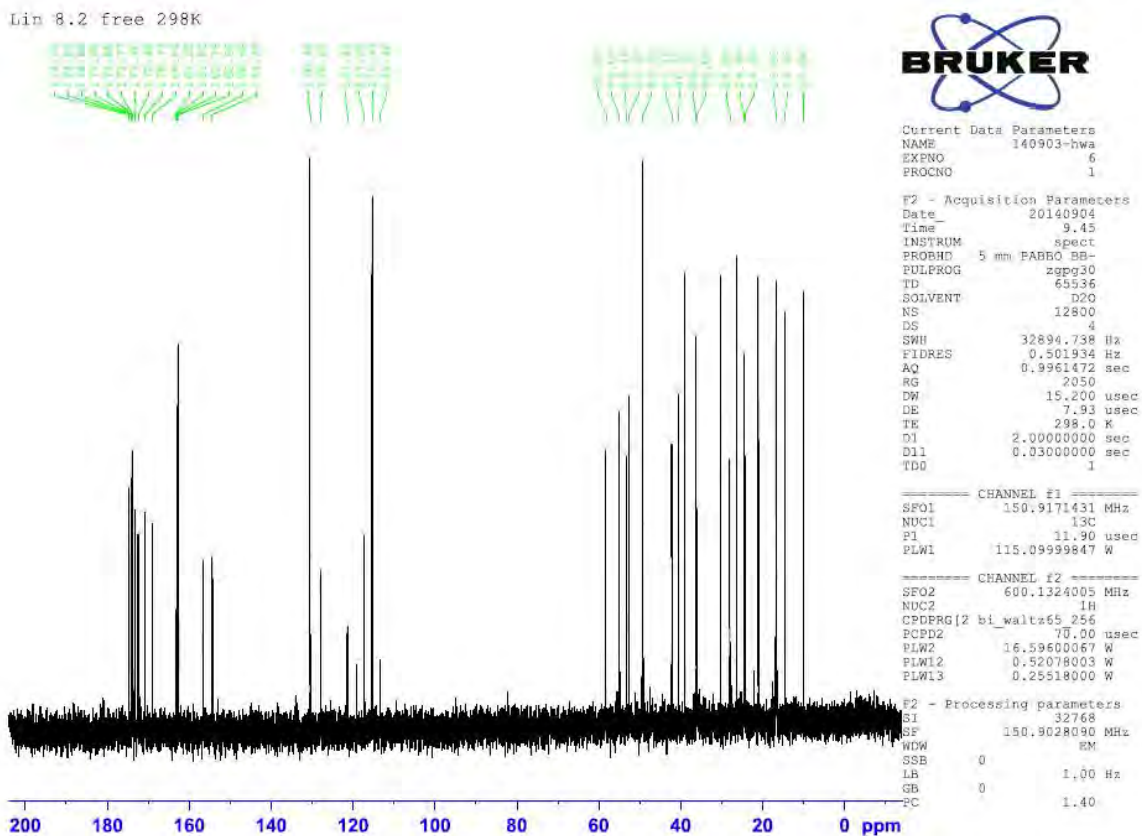

# Supporting Information

## 8.2 LIN: HRMS

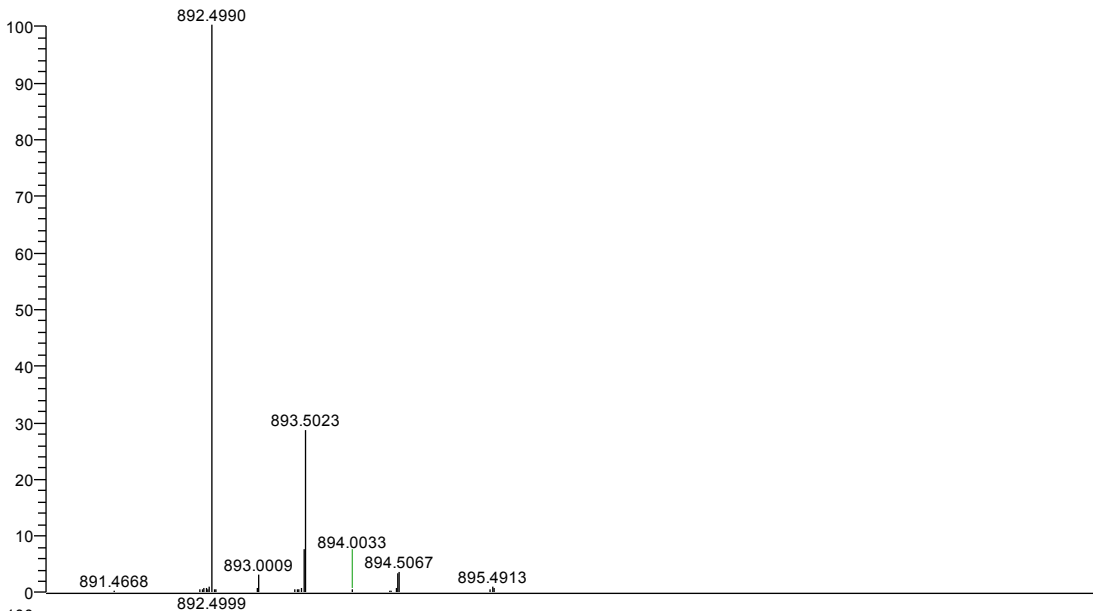

NL:  
1.93E7  
H-5\_Pos\_Full#4  
RT: 0.17 AV: 1 T:  
FTMS + c NSI Full  
ms  
[100.00-2000.00]

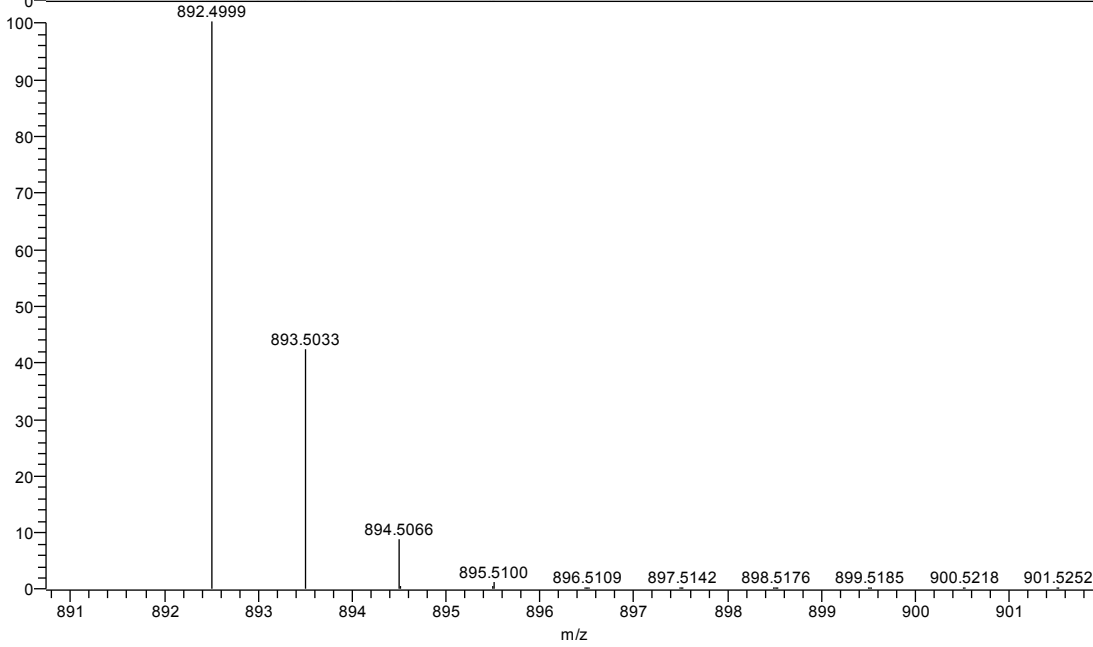

NL:  
6.05E5  
C<sub>39</sub>H<sub>65</sub>N<sub>3</sub>O<sub>11</sub>+H:  
C<sub>39</sub>H<sub>66</sub>N<sub>3</sub>O<sub>11</sub>  
pa Chrg 1

Supporting Information

8.2 LIN: LC/MS

==== Shimadzu LCMSsolution Analysis Report ====

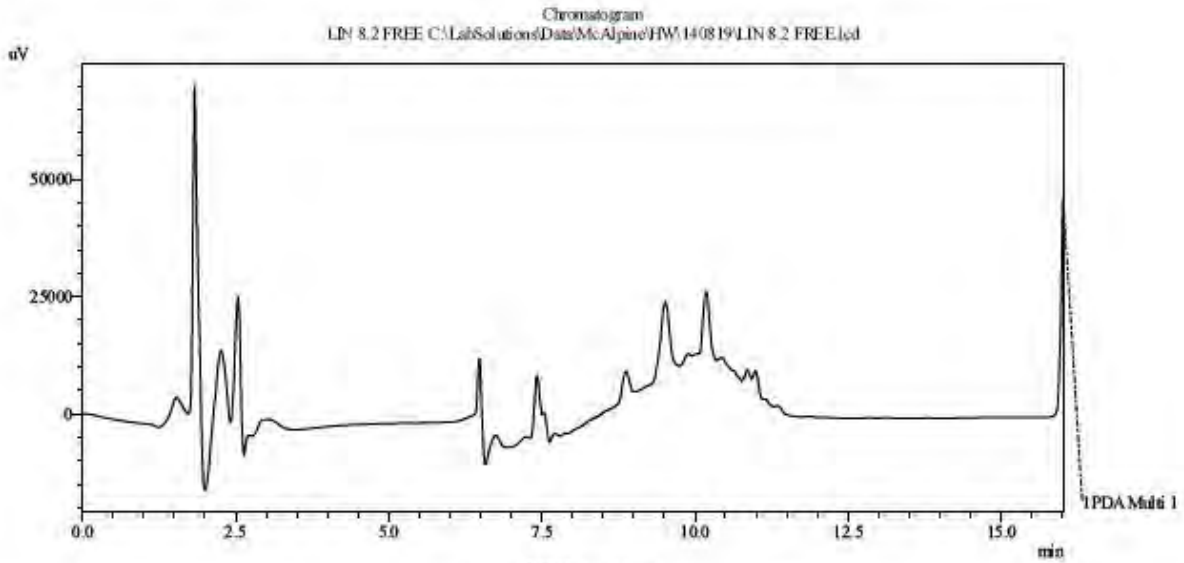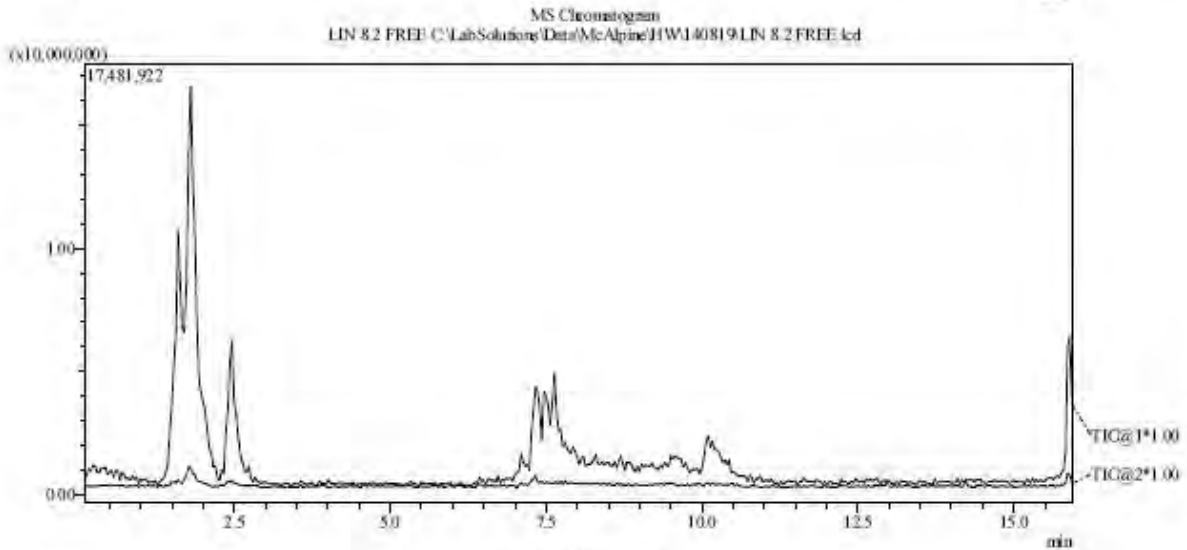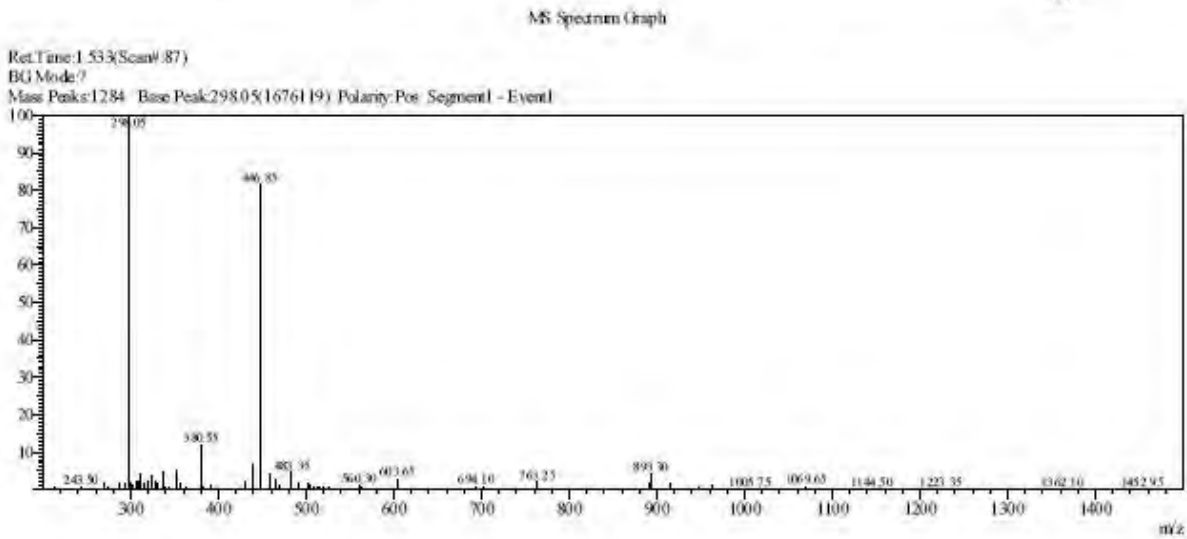



## Supporting Information

### 8.2 CYC: $^1\text{H}$ NMR and $^1\text{H}$ - $^{13}\text{C}$ HSQC NMR

Cyc 8.2 free 308K

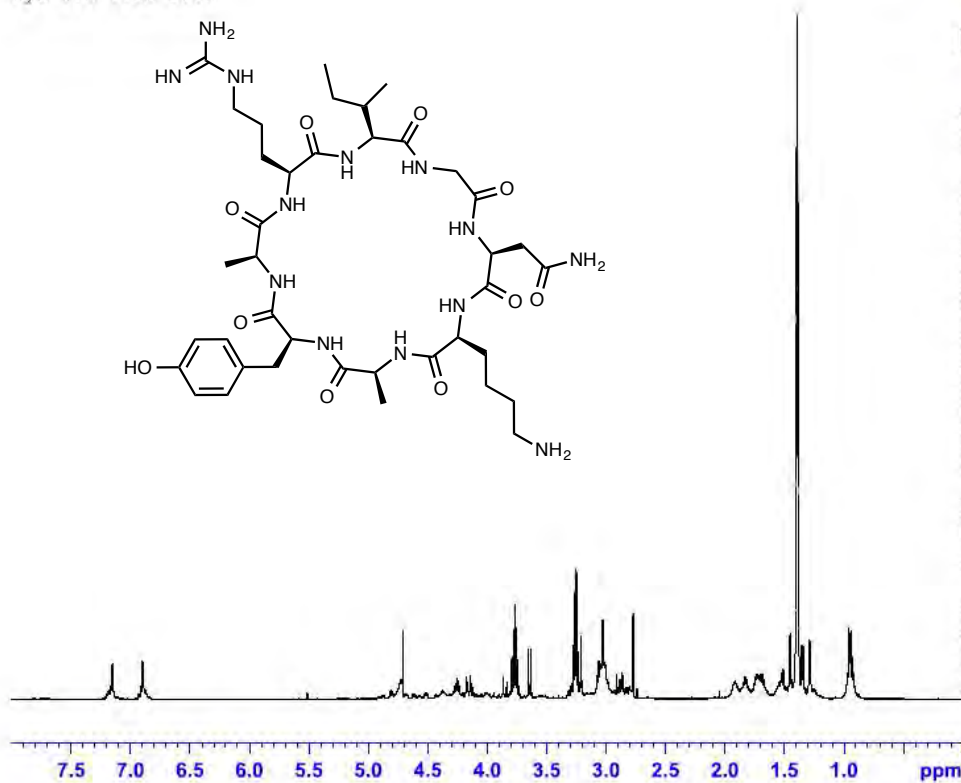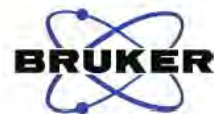

Current Data Parameters  
 NAME 140905-hwa  
 EXPNO 3  
 PROCNO 1

F2 - Acquisition Parameters  
 Date 20140905  
 Time 17.51  
 INSTRUM spect  
 PROBE 5 mm PABBO BB-  
 PULPROG zgpg30  
 TD 48076  
 SOLVENT D2O  
 NS 32  
 DS 4  
 SWH 6302.521 Hz  
 FIDRES 0.131095 Hz  
 AQ 3.8140292 sec  
 RG 144  
 DW 79.333 usec  
 DE 7.19 usec  
 TE 308.0 K  
 D1 20.0000000 sec  
 D12 0.0002000 sec  
 TDD 1

CHANNEL f1  
 SF01 600.1328218 MHz  
 NUCL1 1H  
 P1 12.40 usec  
 PLW1 16.59600067 W  
 PIW9 0.00002564 W

F2 - Processing parameters  
 SI 131072  
 SF 600.1300000 MHz  
 WDW EM  
 SSB 0  
 LB 0.30 Hz  
 GB 0  
 PC 1.00

Cyc 8.2 free 308K HSQC

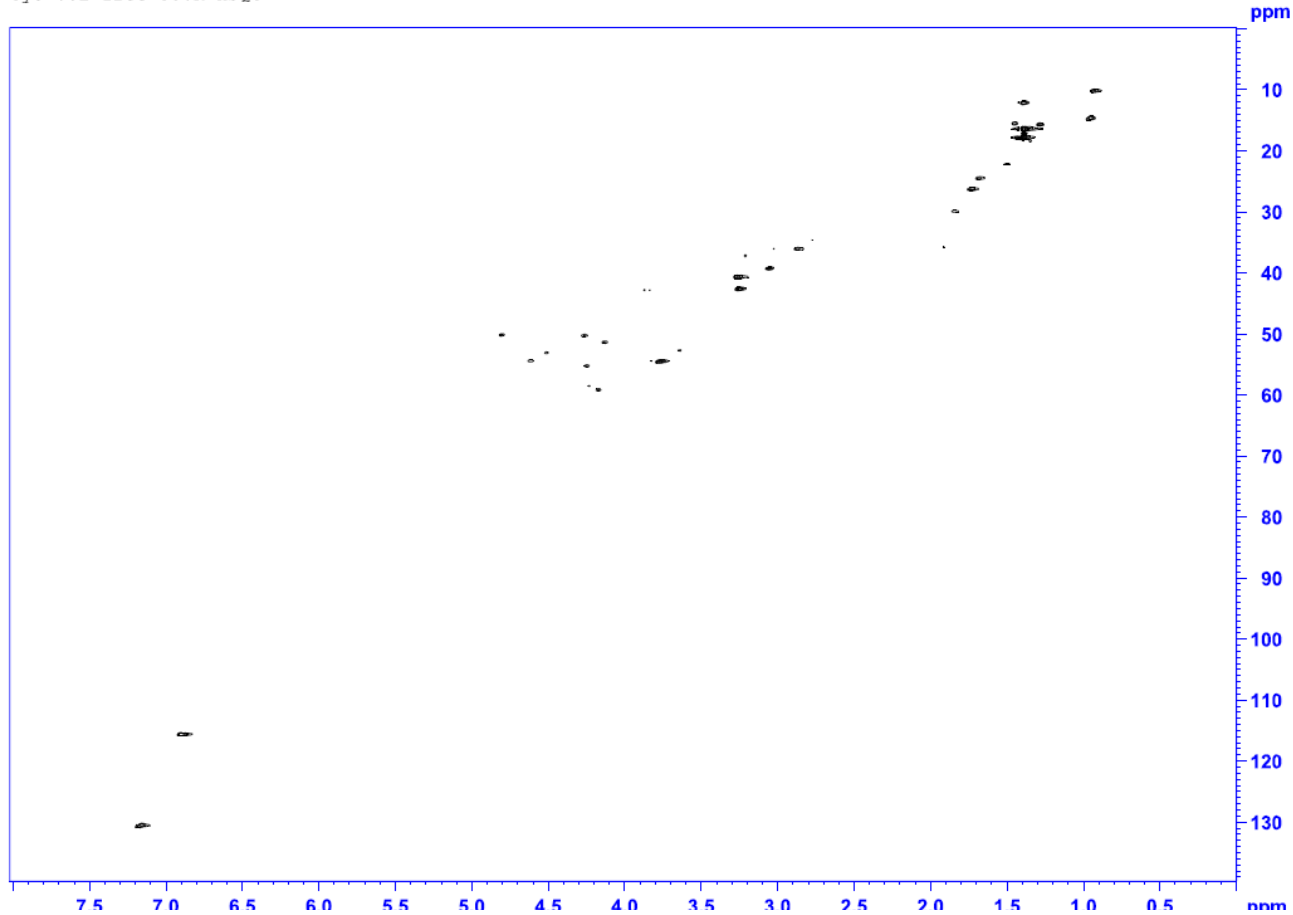

# Supporting Information

## 8.2 CYC: $^1\text{H}$ - $^{13}\text{C}$ HMBC NMR and HRMS

Cyc 8.2 free 308K HMBC

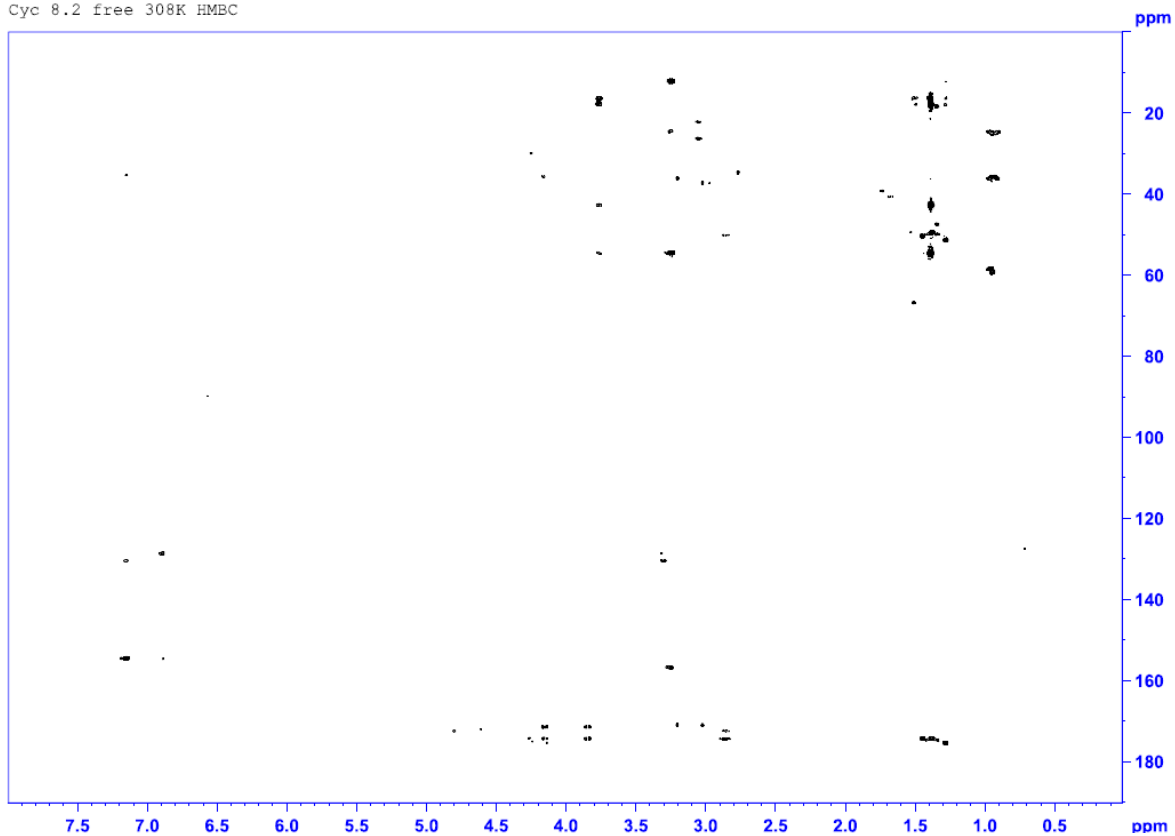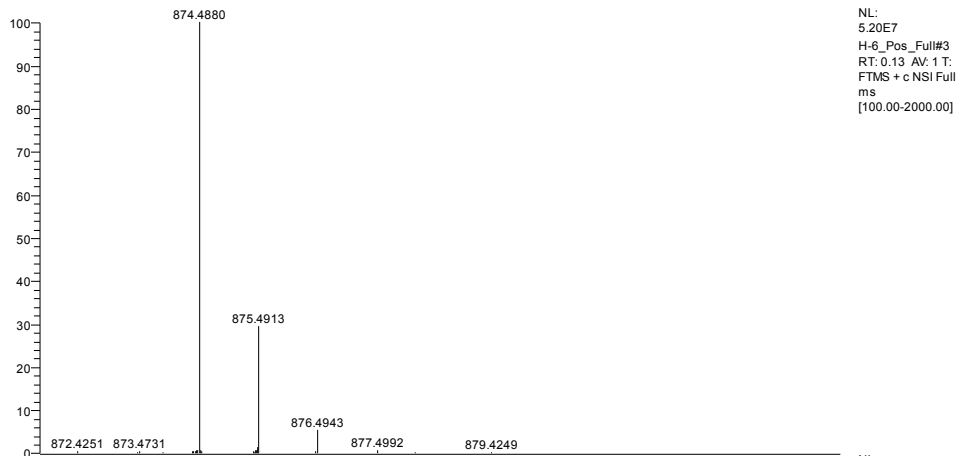

NL:  
5.20E7  
H-6\_Pos\_Full#3  
RT: 0.13 AV: 1 T:  
FTMS + c NSI Full  
ms  
[100.00-2000.00]

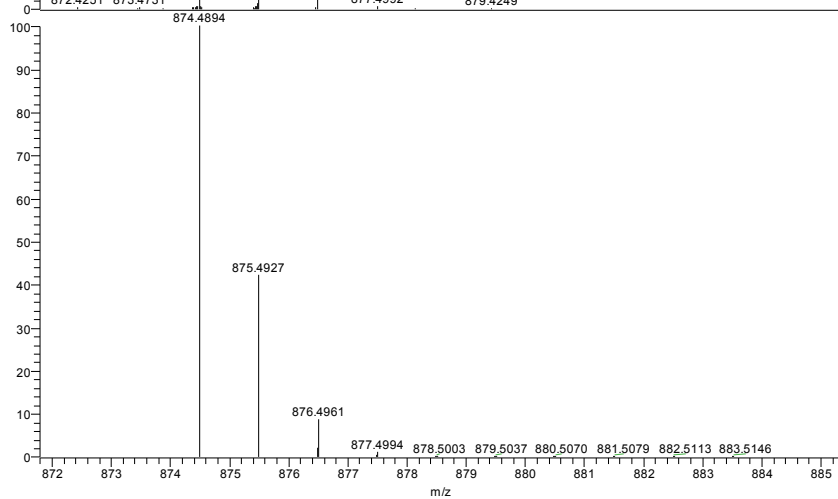

NL:  
6.07E5  
C<sub>39</sub>H<sub>63</sub>N<sub>3</sub>O<sub>2</sub>+H:  
C<sub>39</sub>H<sub>64</sub>N<sub>3</sub>O<sub>2</sub>  
pa Chrg 1

8.2 CYC: LC/MS

==== Shimadzu LCMSsolution Analysis Report ====

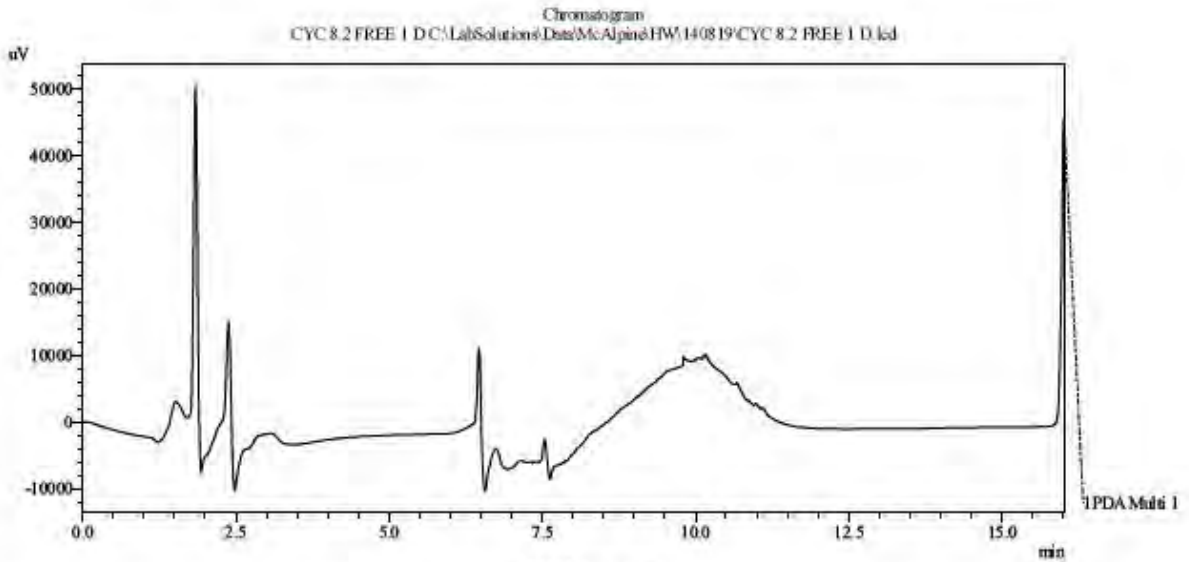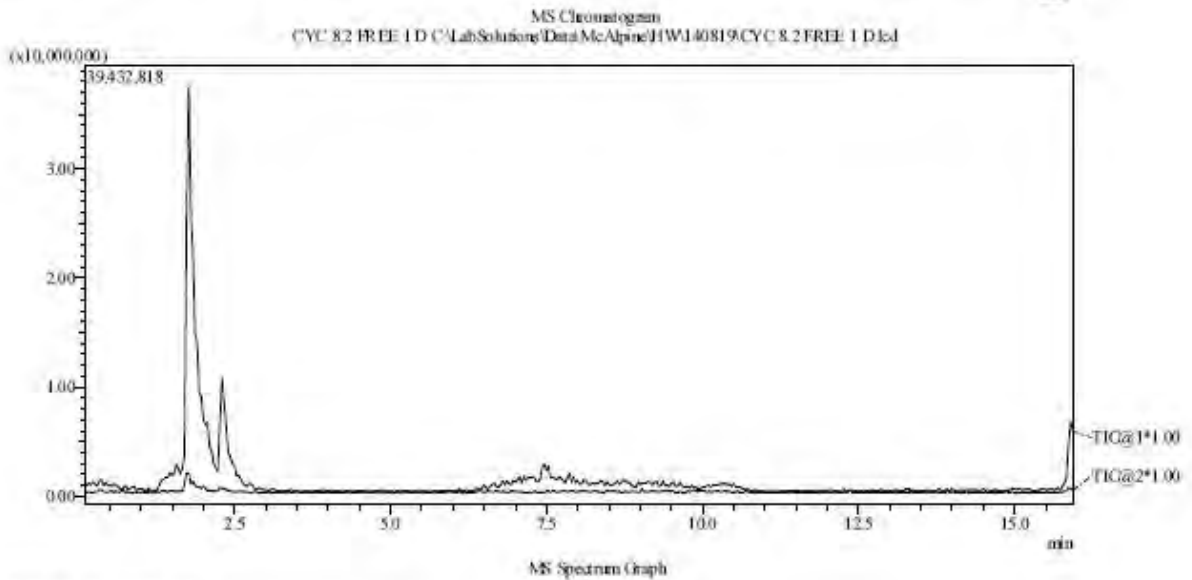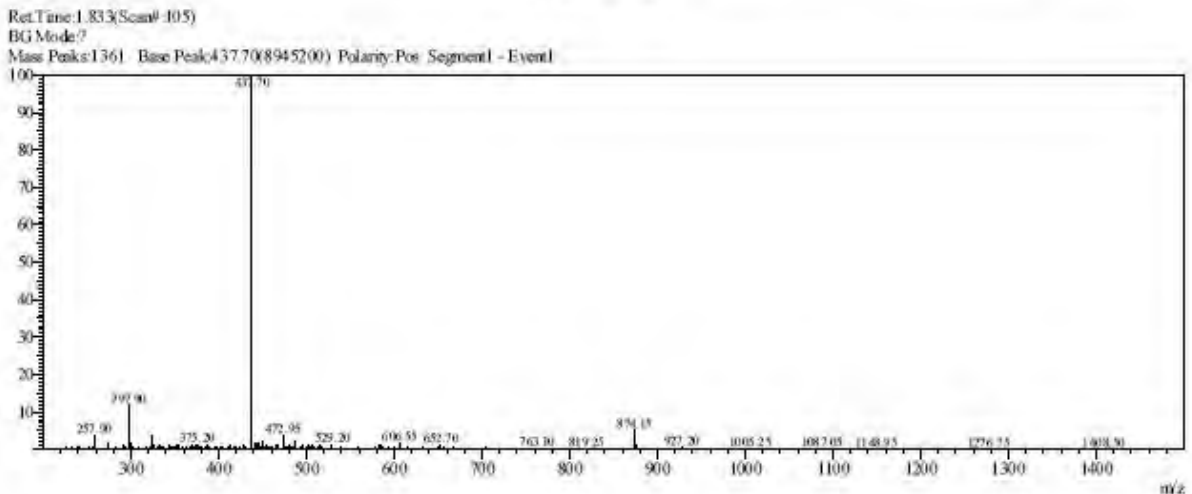

# Supporting Information

## TPR Peptide: <sup>1</sup>H NMR and <sup>13</sup>C NMR

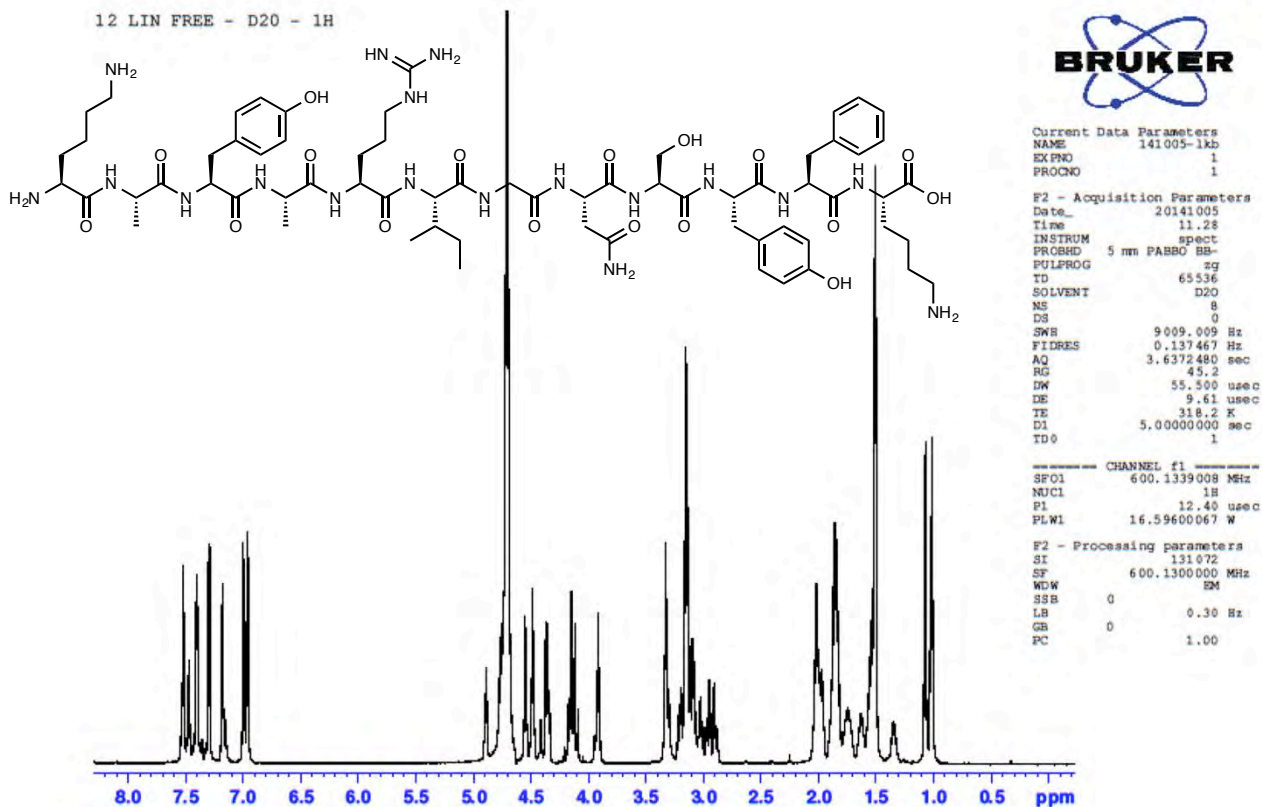

12 LIN FREE - D20 -13C

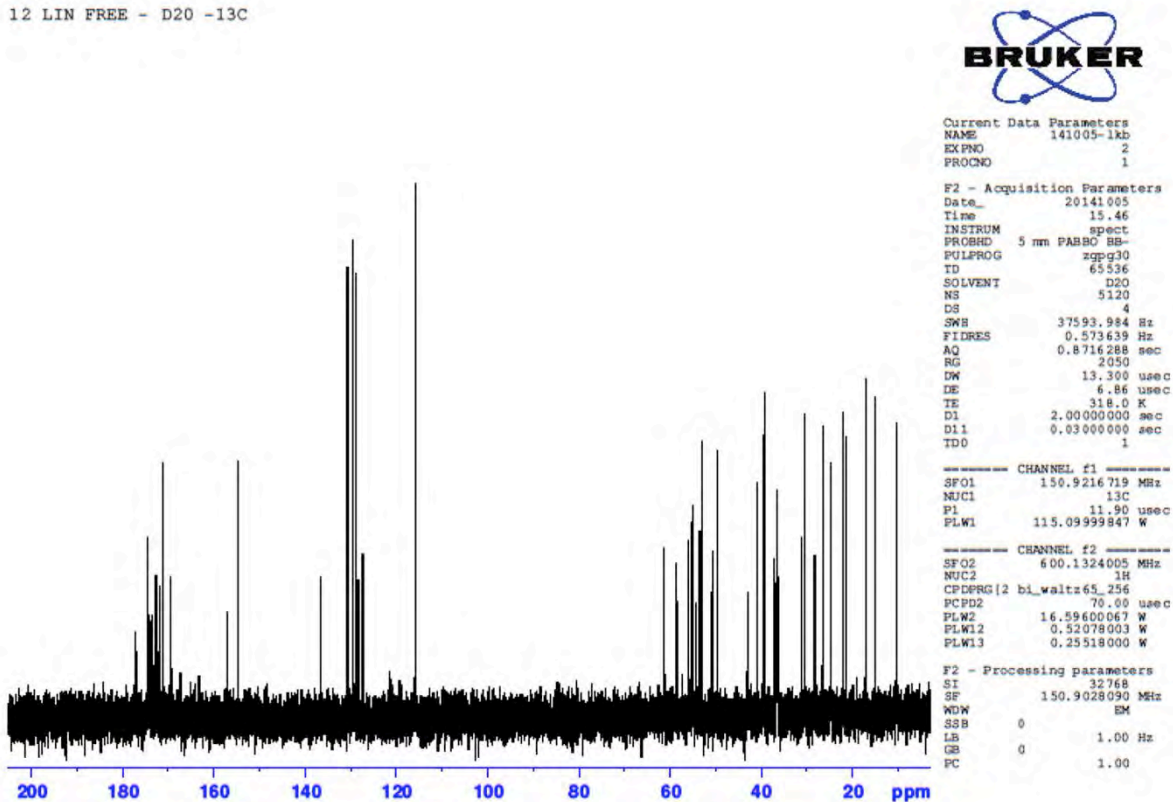

# Supporting Information

## TPR Peptide: $^1\text{H}$ - $^{13}\text{C}$ HSQC NMR and $^1\text{H}$ - $^{13}\text{C}$ HMBC NMR

12 LIN FREE - D2O - HSQC

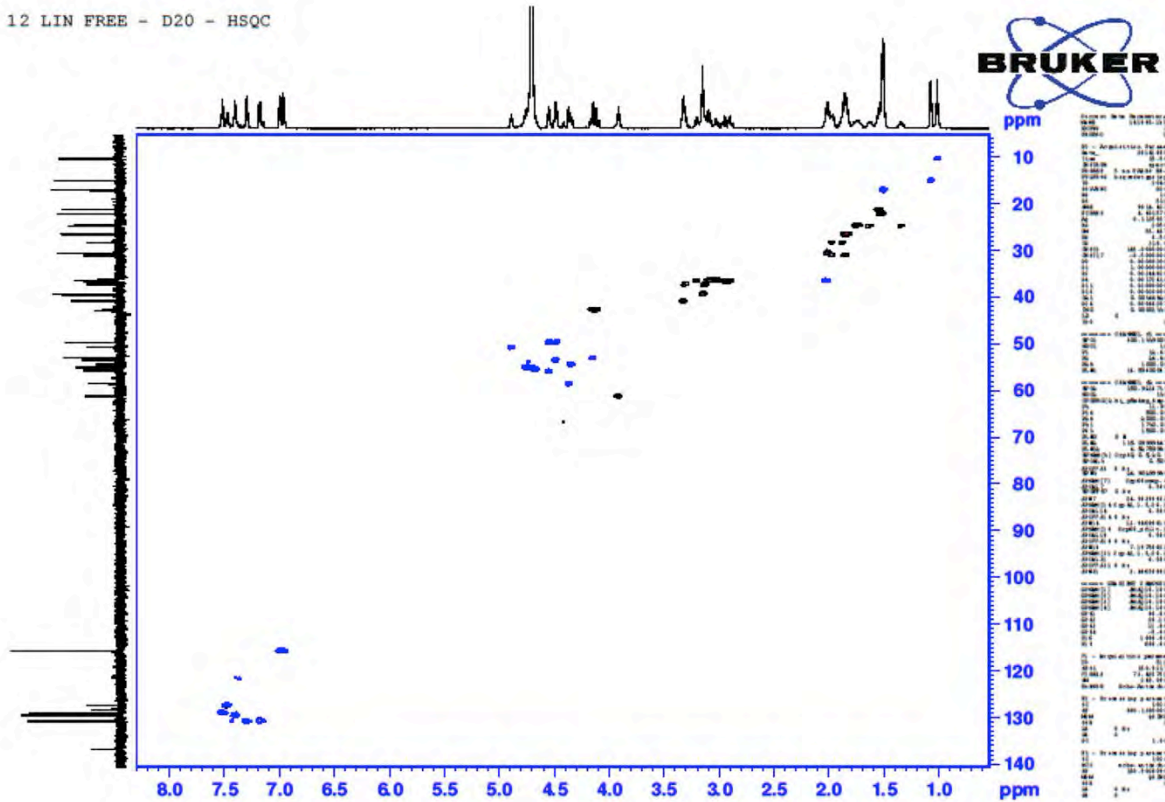

12 LIN FREE - D2O - HMBC

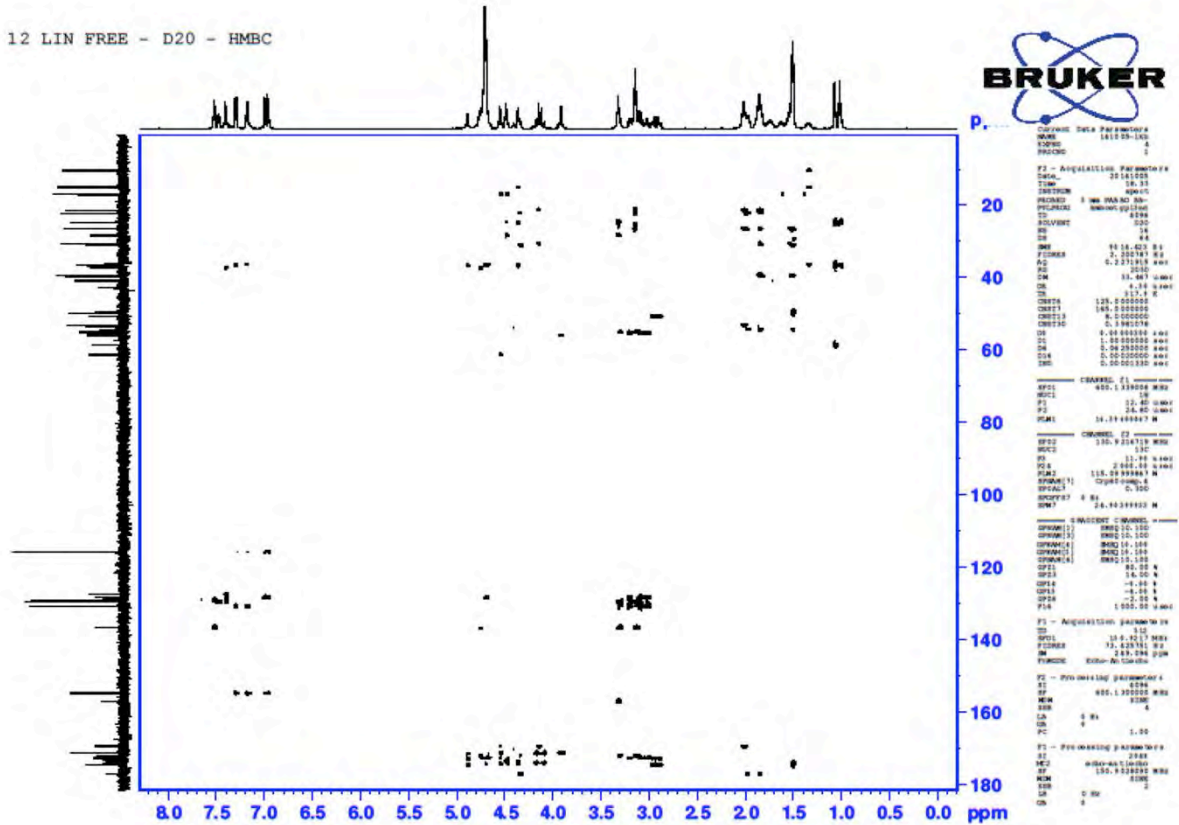

# Supporting Information

## TPR Peptide: $^1\text{H}$ - $^1\text{H}$ COSY NMR and HRMS

12 LIN FREE - D2O - COSY

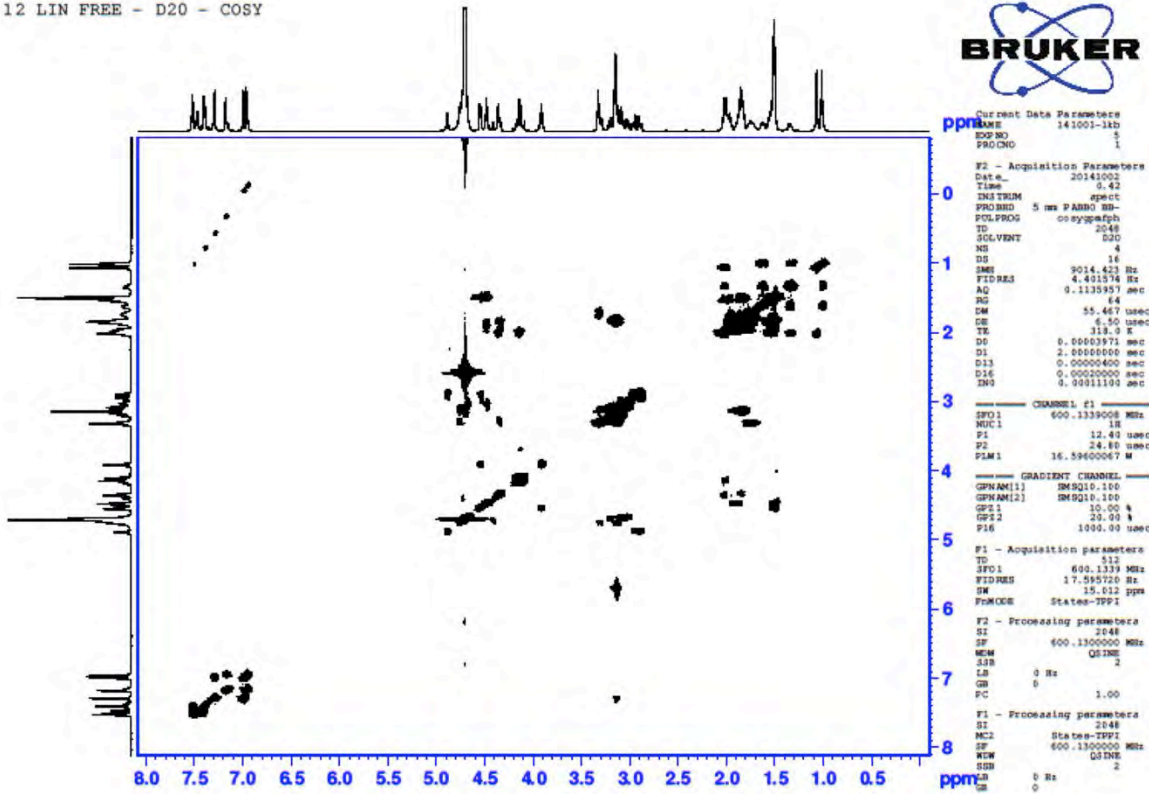

L-11\_Pos\_Full#3 RT: 0.11 AV: 1 NL: 8.35E6  
 T: FTMS + c NSI Full ms [50.00-2000.00]

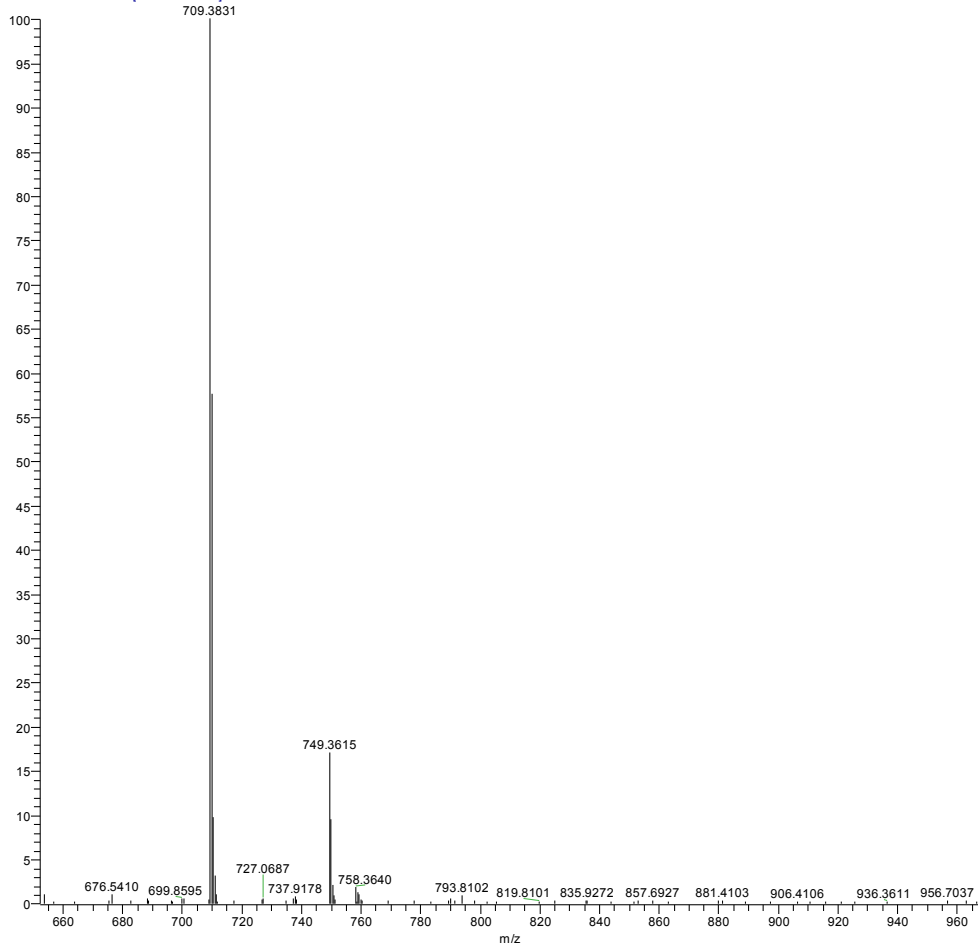

Supporting Information

TPR Peptide: LC/MS

==== Shimadzu LCMSsolution Analysis Report ====

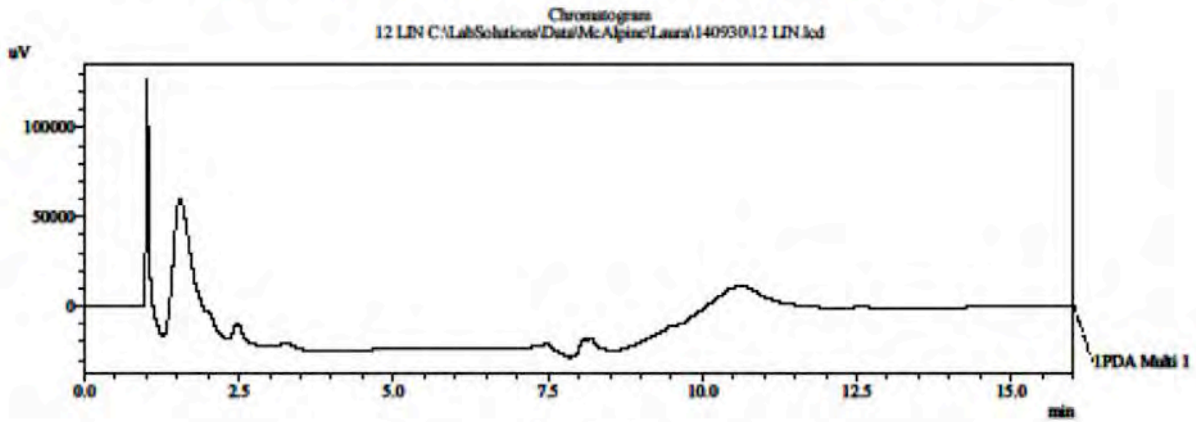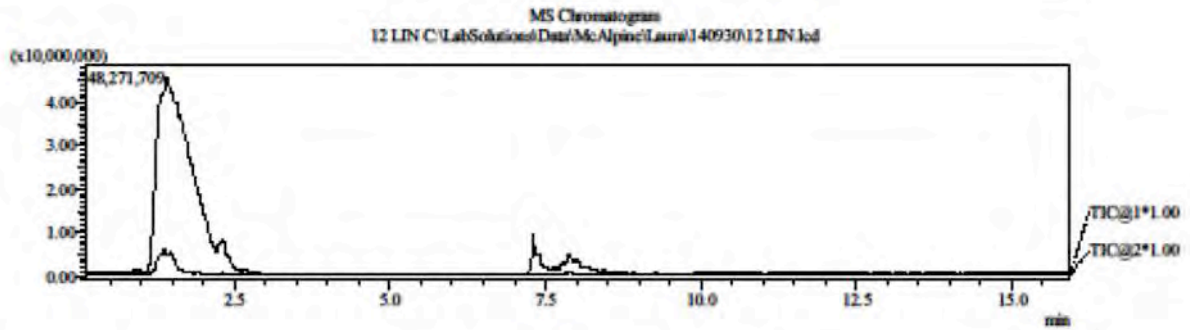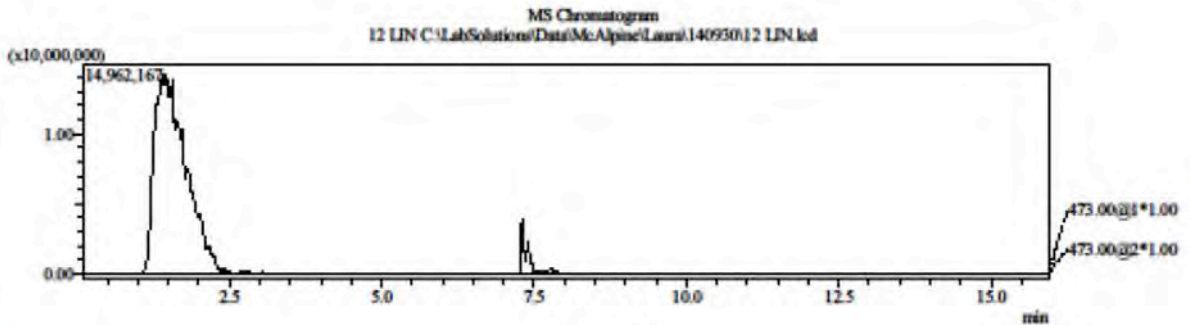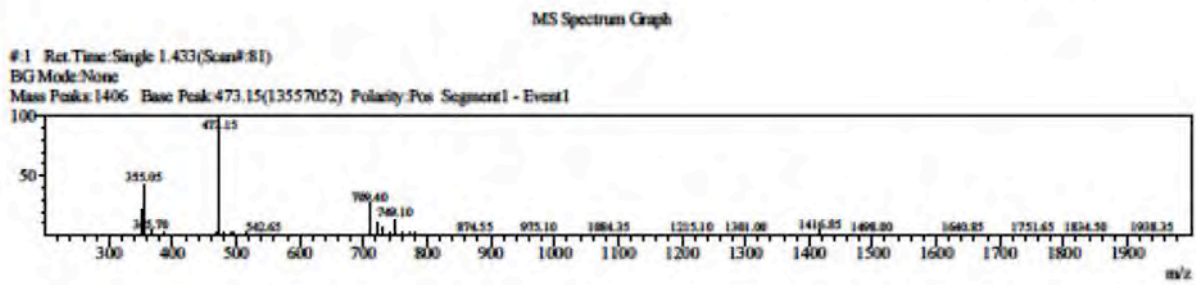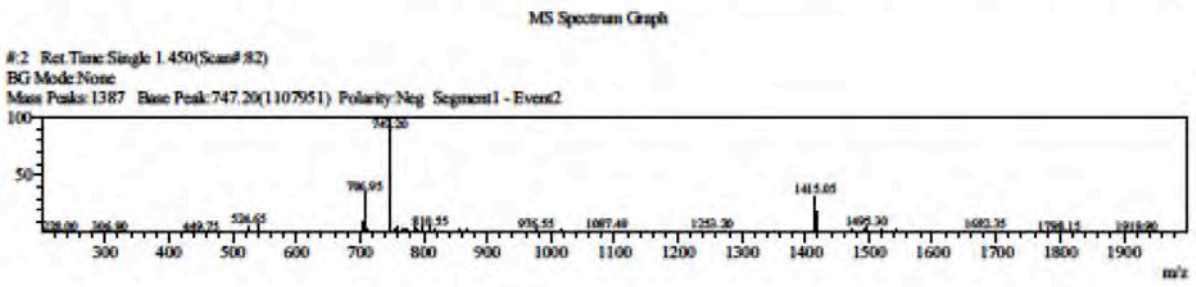

## Supporting Information

### **Protein Binding Assay**

The binding assays were performed using either a HSP90 $\alpha$  (C-terminal) Inhibitor Screening Kit (cat. 50317) or HSP90 $\beta$  (C-terminal) Inhibitor Screening Kit (cat. 50314) purchased from BPS Bioscience. The assay was performed according to the manufacturer's protocol and utilised AlphaScreen technology (PerkinElmer). The test compounds were dissolved in 100% DMSO and diluted with water to the desired concentration so that the final dilution was dissolved in 5% DMSO with water. 2  $\mu$ L of the dilution was added to a 10  $\mu$ L reaction so that the final concentration of DMSO was 1% in all reactions. The reactions were conducted at room temperature for 30 min in a 10  $\mu$ L mixture containing assay buffer, 6 ng (24 nM) of a C-terminal fragment of either HSP90 $\alpha$  (Uniprot P07900, a.a. 535-732) or HSP90 $\beta$  (Uniprot P08238, a.a. 527-724), 40 ng (100 nM) cyp40, and the test compound. After the 30 min incubation, 10  $\mu$ L of detection buffer containing 20  $\mu$ g/ml glutathione acceptor beads (Perkin Elmer) were added to the reaction mix and incubated for 30 min in the dark. 10  $\mu$ L of 40  $\mu$ g/ml streptavidin donor beads (Perkin Elmer) were then added and the final 30  $\mu$ L mixture was incubated for one hour in the dark. The AlphaScreen signal was measured using EnSpire multimode plate reader (Perkin Elmer).

### **Luciferase Protein Renaturation Assay**

Protocol was adapted from the following paper:

L. Galam, M. K. Hadden, Z. Ma, Q. Z. Ye, B. G. Yun, B. S. Blagg and R. L. Matts, *Bioorganic & medicinal chemistry*, 2007, **15**, 1939.

Luciferase (L9506, Sigma-Aldrich) was dissolved in stability buffer (25 mM Tricine HCl (pH 7.8), 8 mM MgSO<sub>4</sub>, 0.1 mM EDTA and 10 mg/mL acetylated BSA) before adding 1% Triton X-100 and 10% glycerol. Luciferase solution was then aliquoted and stored at -80°C. 1  $\mu$ L of protein was thawed on ice and denatured at 40°C for 1.5 minutes. Denatured luciferase was immediately stored on ice before being diluted with 64  $\mu$ L cold mix (100 mM TrisHCl pH 7.7, 10 mM Mg(OAc)<sub>2</sub>, 375 mM KCl, 15 mM ATP, and 25 mM creatine phosphate), 6.4  $\mu$ L creatine phosphokinase (CPK) in 50% glycerol and 8.4  $\mu$ L milli-Q water to produce a final volume of 80  $\mu$ L. The denatured luciferase solution was then diluted 1:10 with the same ratio of cold mix, CPK and milli-Q water. 10  $\mu$ L of diluted luciferase solution was added to rabbit reticulocyte lysate (RRL, Promega) that had been diluted with RNase-free water (1:4 v/v) and pre-incubated at room temperature with DMSO (1%), test compound or control compound for 5 hours. Denatured luciferase was incubated for 3 hours with the lysate before 30  $\mu$ L of the reaction mixture was removed and combined with 40  $\mu$ L of Bright-Glo Luciferase Assay System (Promega) and read on an illuminometer (Berthold Orion Microplate Luminometer).

### **<sup>1</sup>H NMR Titration Experiments**

<sup>1</sup>H NMR spectra were obtained on Bruker Avance III 600 MHz. All samples were dissolved in a buffer consisting of 25 mM dibasic sodium phosphate and 25 mM sodium chloride in deuterium oxide (D<sub>2</sub>O) with a pH of 7.2. Spectra were obtained at 298K (25°C).



Full Spectra of  $^1\text{H}$  NMR Titration Experiment

MEEVD + 5.1 CYC

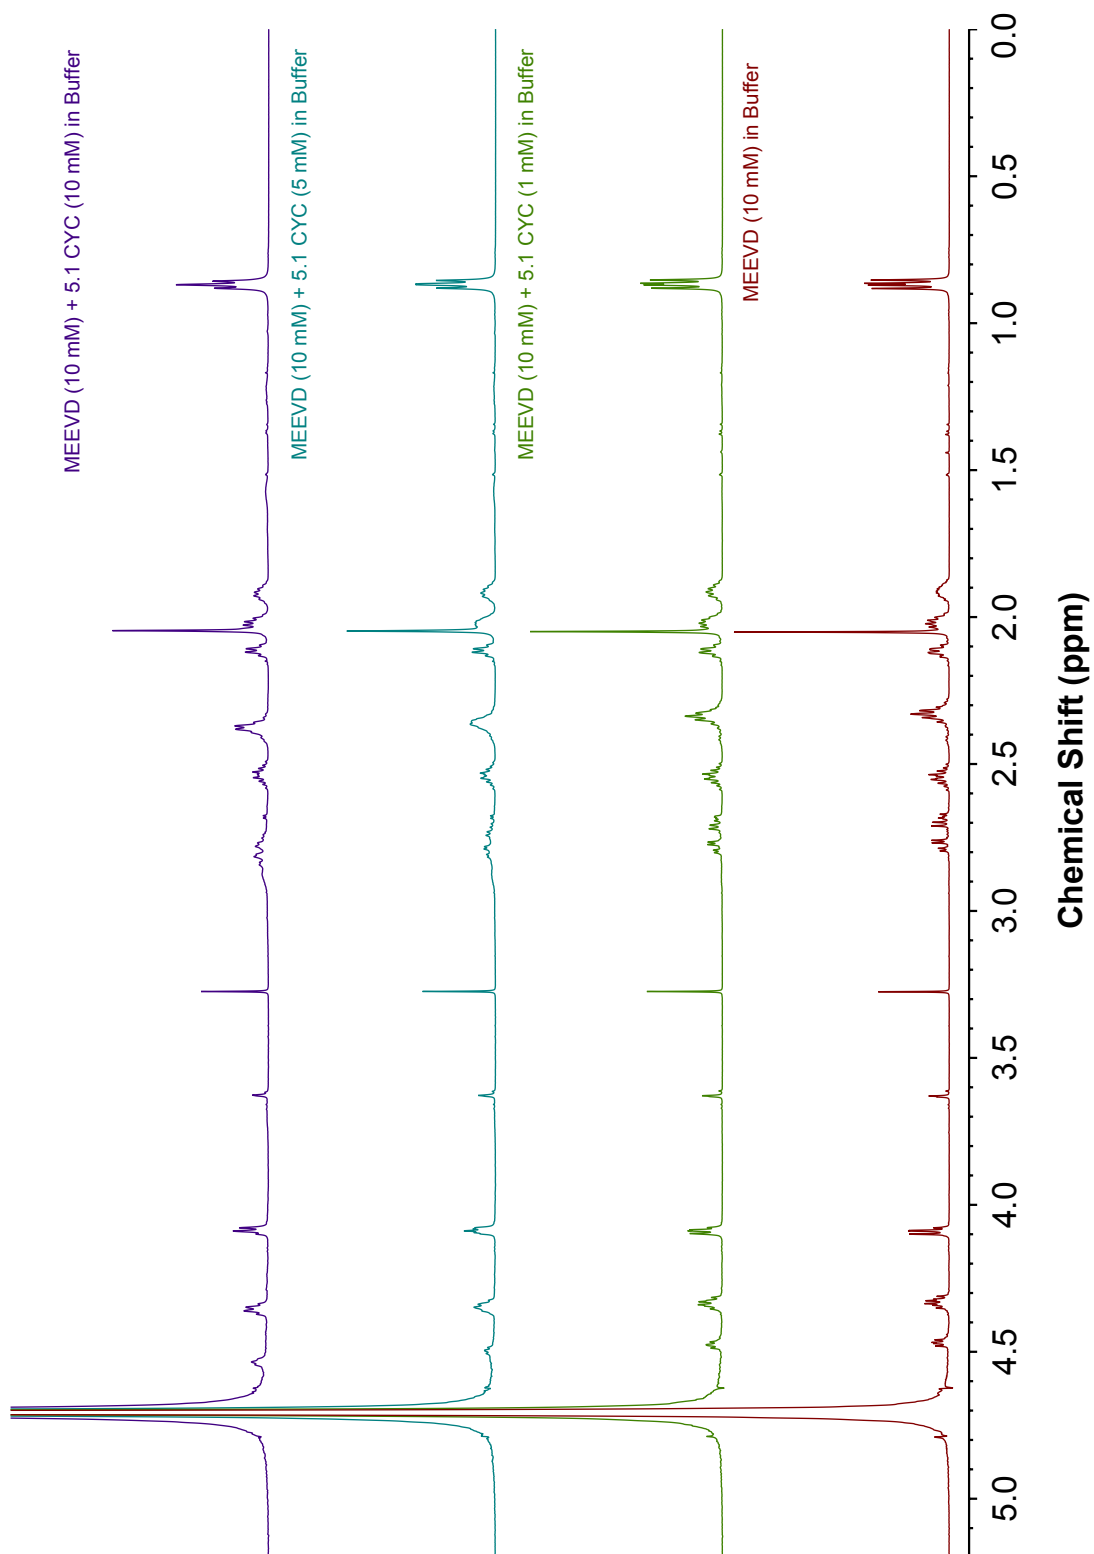

MEEVD + Novobiocin

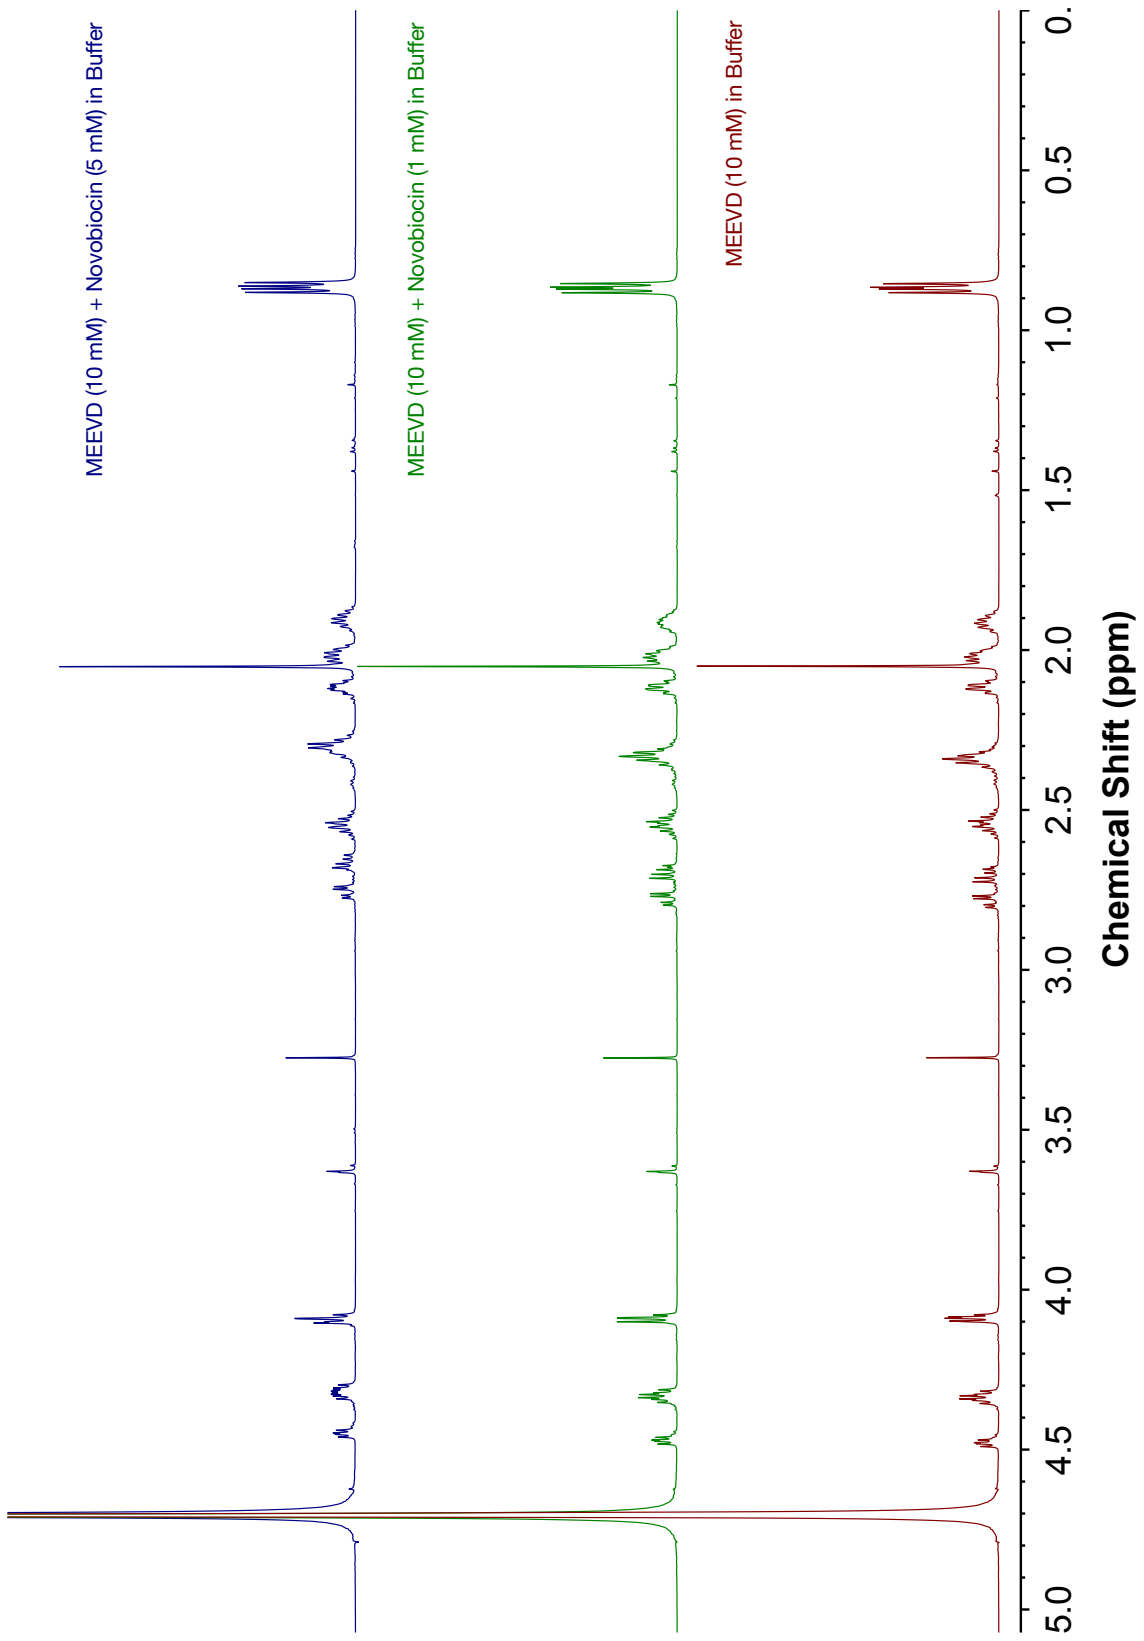

MEEVD + TPR

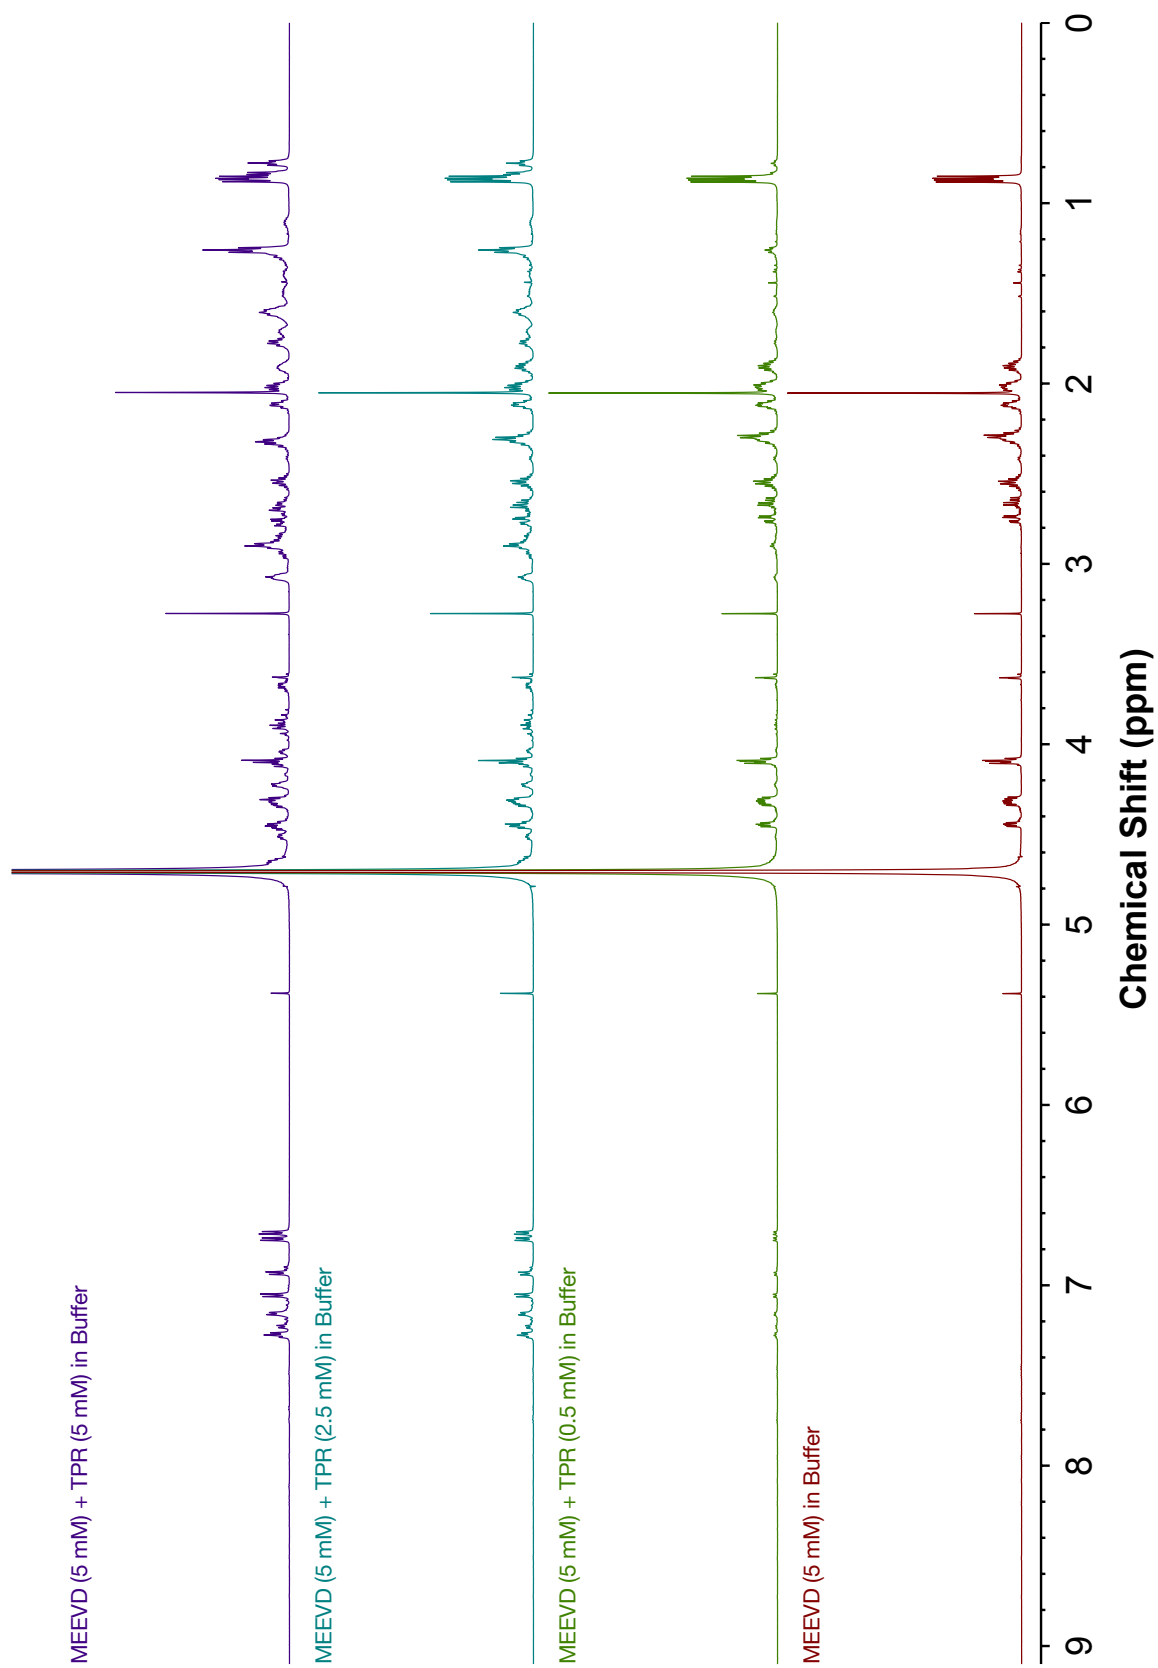

TPR + 5.1 CYC

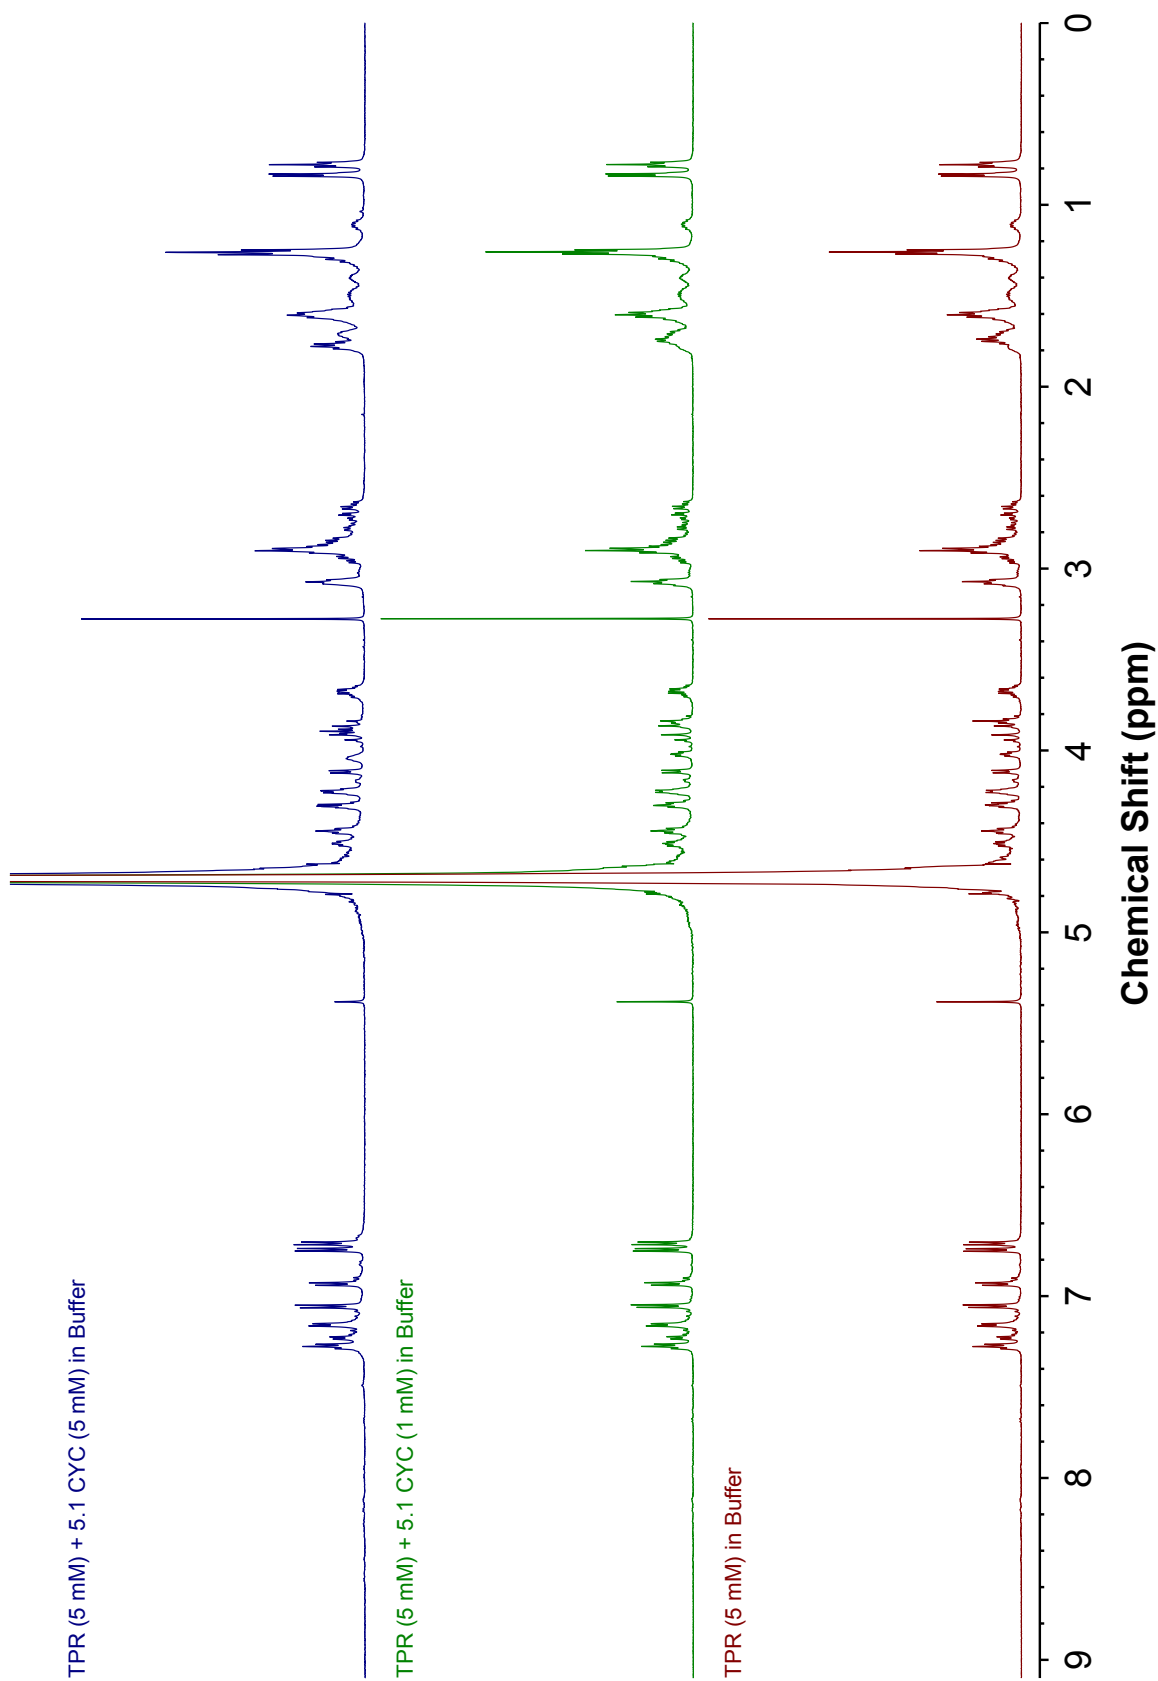

## Supporting Information

### 5.1 CYC

5.1 CYC (5 mM) in Buffer

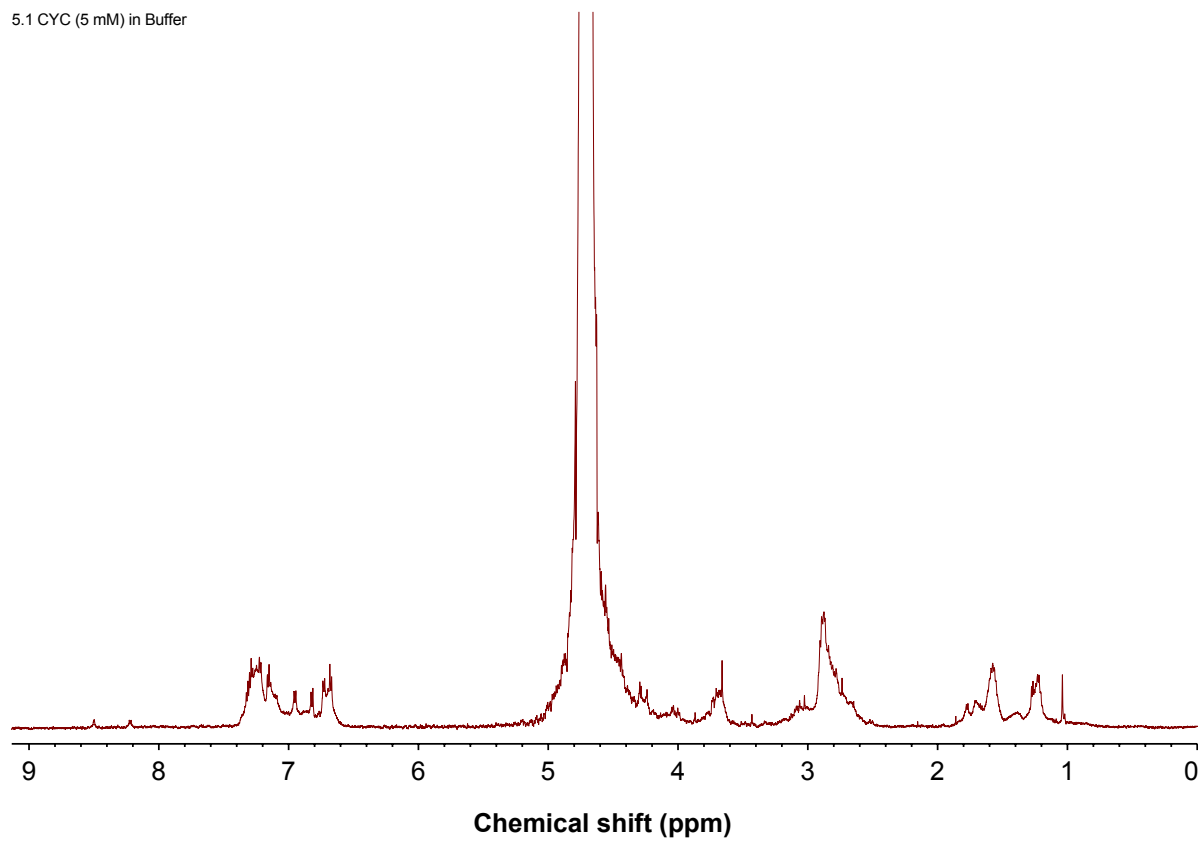

### Novobiocin

Novobiocin (10 mM) in Buffer

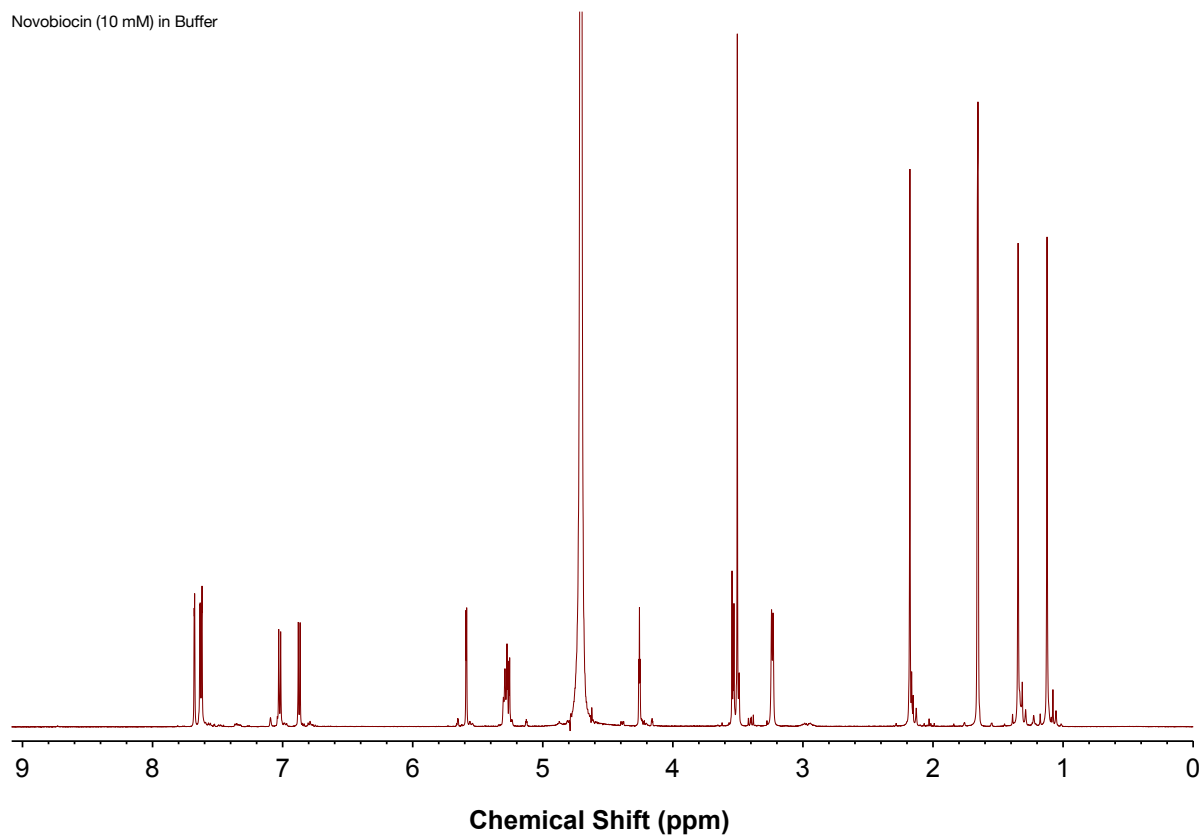

## Supporting Information

### Enlarged Spectra of $^1\text{H}$ NMR Titration Experiment

#### MEEVD + 5.1 CYC

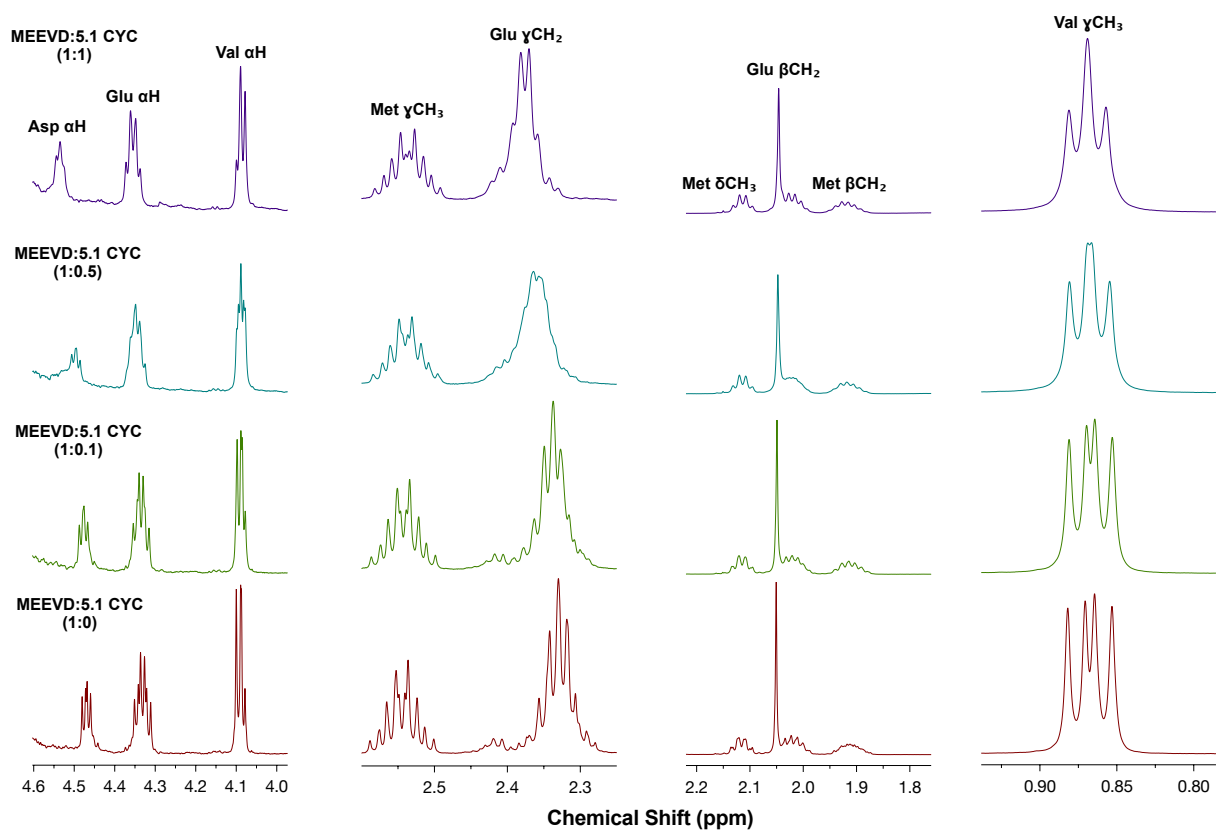

#### MEEVD + Novobiocin

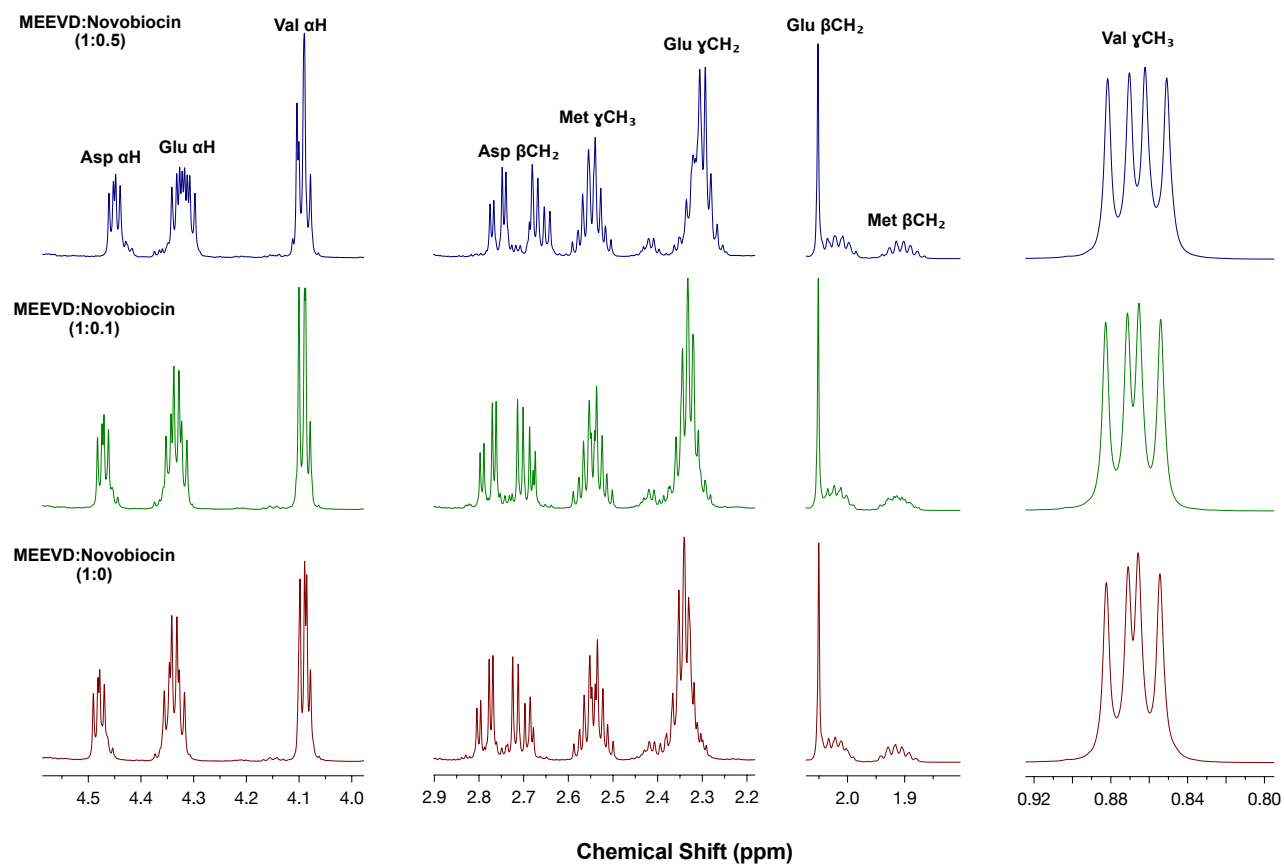

## Supporting Information

### MEEVD + TPR

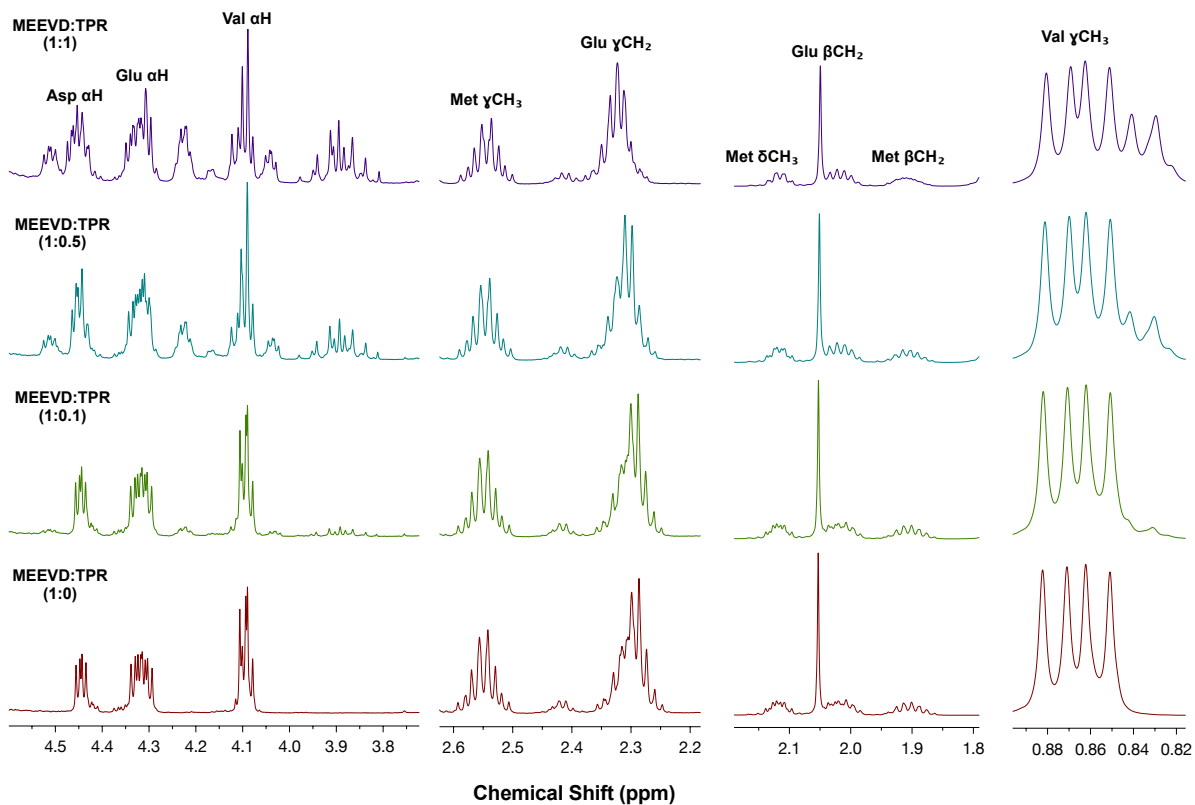

### TPR + 5.1 CYC

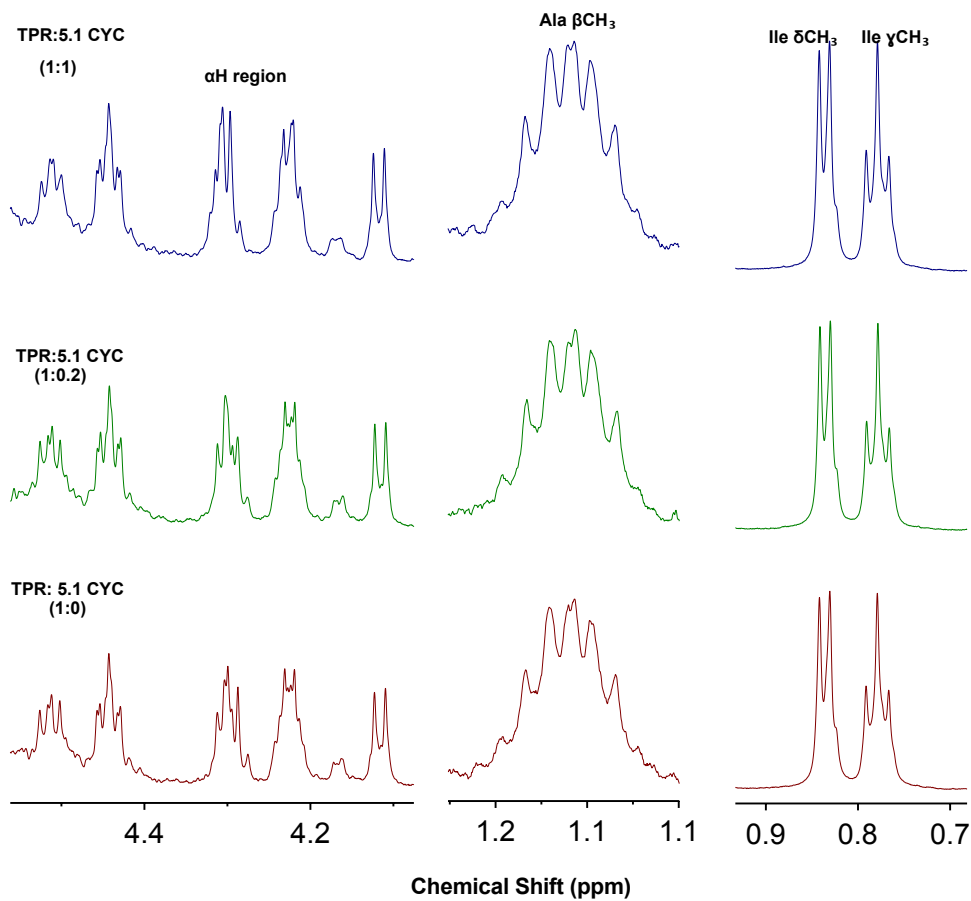

Supplement: c5cc03245h1.pdf [file c5cc03245h1.pdf]
